# Supplementary material for: Facile synthesis of 5α-functionalized pyrroles via multicomponent reactions of vicinal tricarbonyl compounds, enamines, and nucleophiles
Source: Royal Society of Chemistry journal article supplement (doi:10.1039/d4qo00951g), 2024-01-01
Supplement: d4qo00951g1.pdf [file d4qo00951g1.pdf]

## Supporting Information

### Facile Synthesis of 5 $\alpha$ -Functionalized Pyrroles *via* Multicomponent Reactions of Vicinal Tricarbonyl Compounds, Enamines, and Nucleophiles

Hua-li Wan,<sup>a,#</sup> Zhao-ping Shi,<sup>a,#</sup> and Qiang Sha<sup>a,\*</sup>

<sup>a</sup> Jiangsu Key Laboratory of Pesticide Science and Department of Chemistry, College of Sciences, Nanjing Agricultural University, 1 Weigang Road, Xuanwu District, Nanjing 210095, P. R. China.

E-mail: [qsha@njau.edu.cn](mailto:qsha@njau.edu.cn)

#### Table of Contents

|                                                                                                                               |                  |
|-------------------------------------------------------------------------------------------------------------------------------|------------------|
| <b>General</b>                                                                                                                | <b>S2</b>        |
| <b>General procedure for the synthesis of 1,3-dicarbonyl compounds</b>                                                        | <b>S2</b>        |
| <b>General procedure for the synthesis of enamines 2</b>                                                                      | <b>S3</b>        |
| <b>General procedure for the synthesis of nucleophilic substrates 3</b>                                                       | <b>S4</b>        |
| <b>General procedure for the synthesis of vicinal tricarbonyl compounds 1</b>                                                 | <b>S4</b>        |
| <b>Procedure for B(C<sub>6</sub>F<sub>5</sub>)<sub>3</sub> catalyzed three component reactions of 1, 2 and H<sub>2</sub>O</b> | <b>S4-S5</b>     |
| <b>Procedure for B(C<sub>6</sub>F<sub>5</sub>)<sub>3</sub> catalyzed three component reactions of 1, 2 and alcohol</b>        | <b>S5</b>        |
| <b>Procedure for B(C<sub>6</sub>F<sub>5</sub>)<sub>3</sub> catalyzed three component reactions of 1, 2 and nucleophiles</b>   | <b>S5</b>        |
| <b>Procedure for B(C<sub>6</sub>F<sub>5</sub>)<sub>3</sub> catalyzed three component reactions of 1a, 18 and 19</b>           | <b>S6</b>        |
| <b>Procedure for B(C<sub>6</sub>F<sub>5</sub>)<sub>3</sub> catalyzed three component reactions of 1a, 19 and 20</b>           | <b>S6</b>        |
| <b>Procedure for B(C<sub>6</sub>F<sub>5</sub>)<sub>3</sub> catalyzed three component reactions of 1a, 19 and 21</b>           | <b>S7</b>        |
| <b>General procedure for gram-scale synthesis of 4aa</b>                                                                      | <b>S7</b>        |
| <b>Characterization data of 1,3-dicarbonyl compounds</b>                                                                      | <b>S8-S9</b>     |
| <b>Characterization data of enamines 2</b>                                                                                    | <b>S9-S16</b>    |
| <b>Characterization data of pyrrole products 4-17</b>                                                                         | <b>S16-S50</b>   |
| <b>References</b>                                                                                                             | <b>S51</b>       |
| <b><sup>1</sup>H and <sup>13</sup>C spectra of starting materials, pyrroles 4-17</b>                                          | <b>S52-S144</b>  |
| <b>Crystallographic data for compound 4ag</b>                                                                                 | <b>S145-S160</b> |

**General.**  $^1\text{H}$  NMR and  $^{13}\text{C}$  NMR spectra were recorded in  $\text{CDCl}_3$  or  $\text{DMSO}-d_6$  on a Bruker Avance III 400 MHz spectrometer or JNM-ECZ500R JEOL-500 MHz spectrometer. Chemical shifts are reported in ppm with the solvent signals as reference, and coupling constants ( $J$ ) are given in Hertz (Hz). The peak information is described as: s = singlet, d = doublet, t = triplet, q = quartet, m = multiplet. Analytical thin layer chromatography was performed on 0.25 mm extra hard silica gel plates with UV254 fluorescent indicator. High-resolution mass spectra (HRMS) were performed on a microTOF-ESI mass spectrometer using  $\text{CsOAc}$  as the standard. Melting points were obtained uncorrected from an Electrothermo Mel-Temp DLX 104 device. Unless otherwise noted, all reagents and solvents (AR grade) were obtained from commercial sources (aladdin, energy-chemical, J&K chemical) and used directly without purification. Unless otherwise noted, all reactions were performed under air atmosphere.

### General procedure for the synthesis of 1,3-dicarbonyl compounds

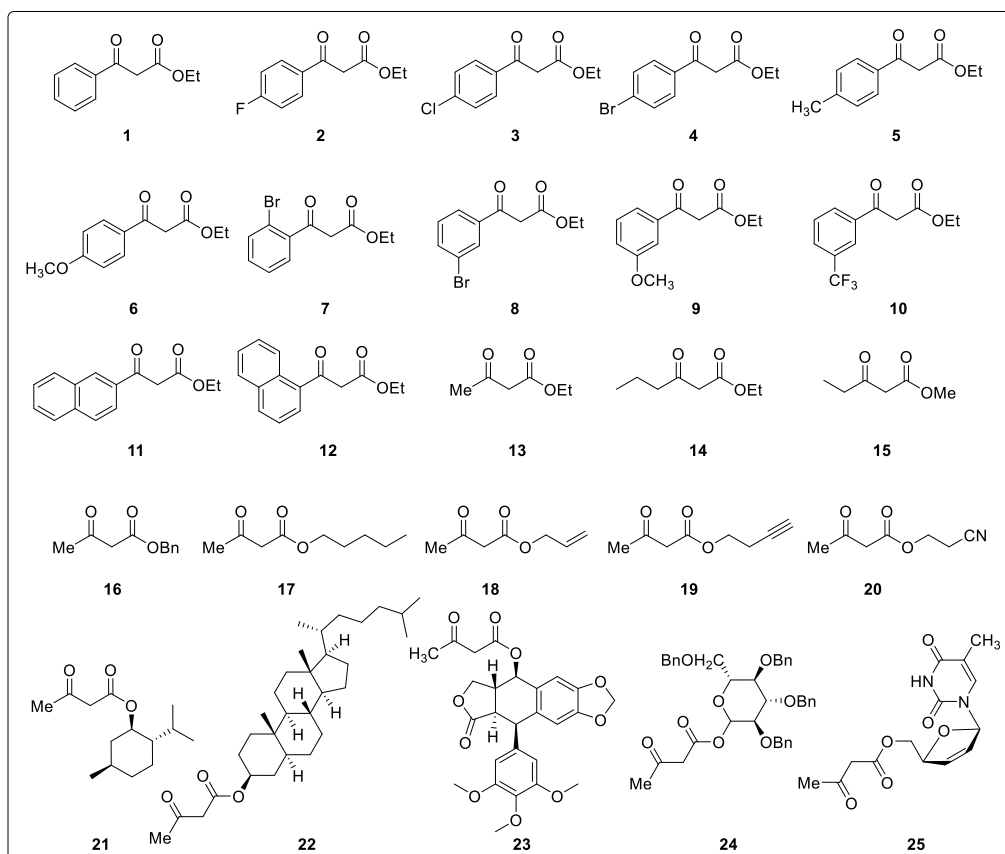

1,3-Dicarbonyl compound **1**, **13-17** was purchased from chemical companies. 1,3-Dicarbonyl compounds **2-12** were synthesized from corresponding ketones and diethyl carbonate.<sup>[1]</sup> 1,3-Dicarbonyl compounds **18-25** were synthesized from corresponding alcohols and 2,2,6-trimethyl-4*H*-1,3-dioxin-4-one.<sup>[2]</sup>

## General procedure for the synthesis of enamines 2

The enamines **1-34** were synthesized by condensation reactions of amines with 1,3-dicarbonyl compounds according to literature procedure.<sup>[4]</sup>

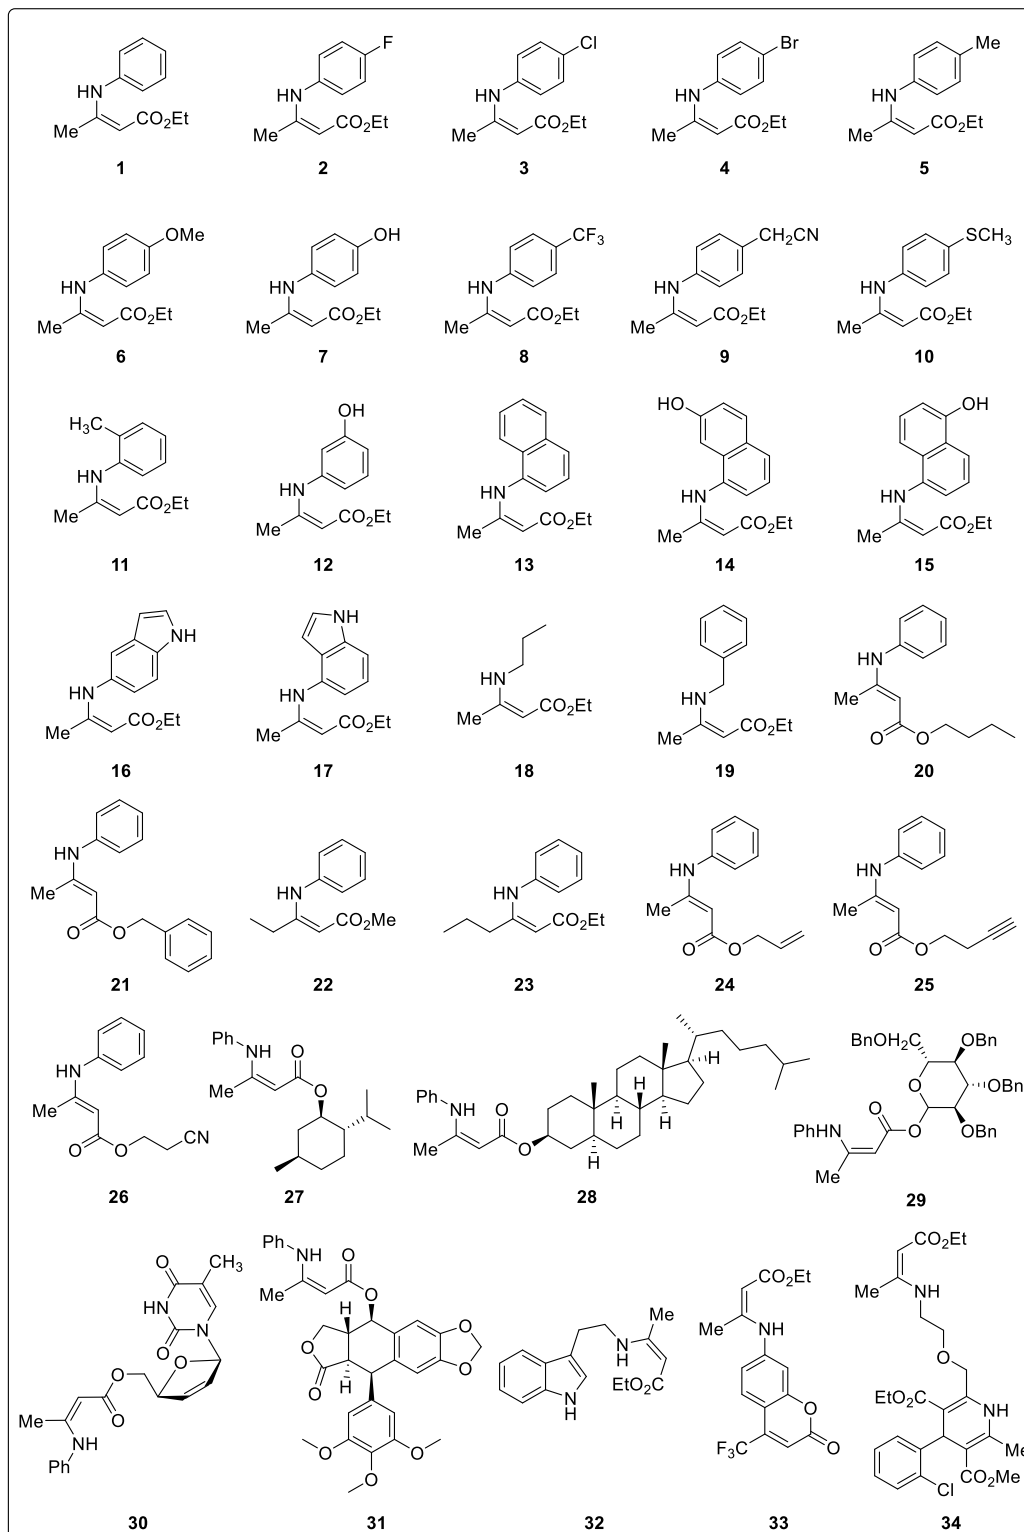

### General procedure for the synthesis of nucleophilic substrates 3

All the nucleophilic substrates that used were purchased from chemical companies and used directly as received.

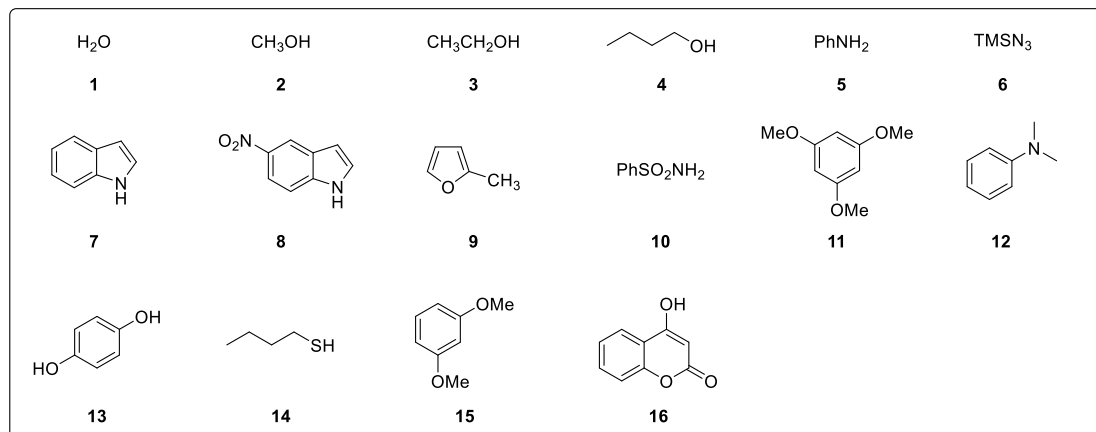

### General procedure for the synthesis of vicinal tricarbonyl compounds 1

The vicinal tricarbonyl compounds were known compounds and were synthesized according to literature.<sup>[5-9]</sup>

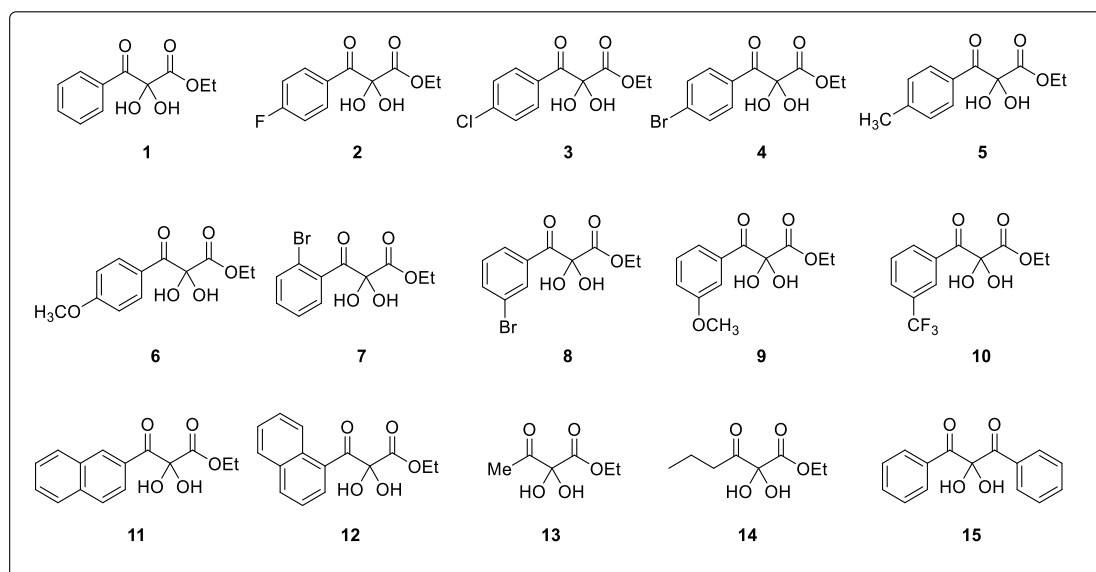

### Procedure for B(C<sub>6</sub>F<sub>5</sub>)<sub>3</sub> catalyzed three component reactions of 1, 2 and H<sub>2</sub>O

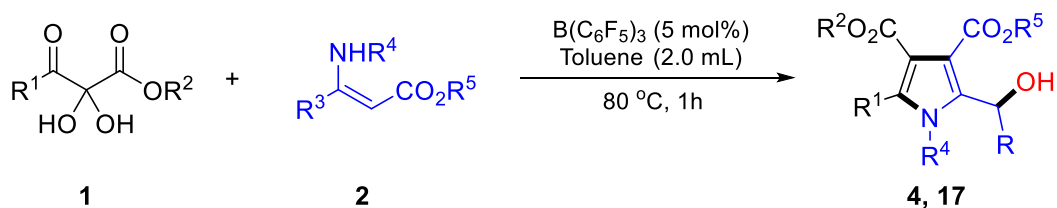

Under air atmosphere, a Schlenk tube with a magnetic stir bar charged with 2,3-diketoester 1



(0.2 mmol), enamine **2** (0.24 mmol, 1.2 equiv.), toluene (2.0 mL) and  $B(C_6F_5)_3$  (0.01 mmol, 5mol%). After being stirred for 1h at 80°C, the mixture was cooled down to room temperature and poured into 10%  $Na_2CO_3$  solution (10 mL), and the resultant mixture was extracted with EtOAc (3×10 mL). The organic layers were combined, washed with brine (2×20 mL), dried over  $Na_2SO_4$ . At this time, the solvent was removed from the reaction mixture under vacuum and the crude reaction mixture was purified by medium pressure chromatography to give **4**, **17** as a solid or oil.

**Procedure for  $B(C_6F_5)_3$  catalyzed three component reactions of **1**, **2** and alcohol**

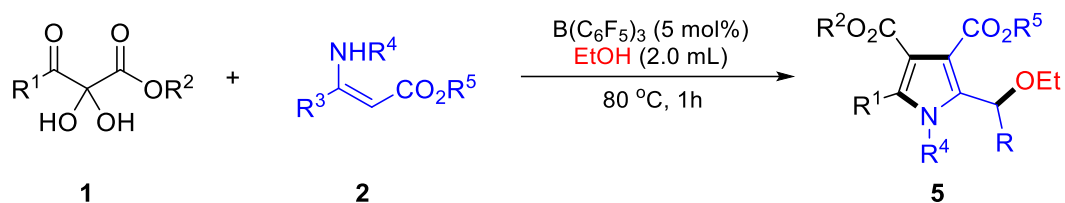

Under air atmosphere, a Schlenk tube with a magnetic stir bar charged with 2,3-diketoester **1** (0.2 mmol), enamine **2** (0.24 mmol, 1.2 equiv.), ethanol (2.0 mL) and  $B(C_6F_5)_3$  (0.01 mmol, 5 mol%). After being stirred for 1h at 80°C, the solvent was removed from the reaction mixture under vacuum and the crude reaction mixture was purified by medium pressure chromatography to give **5** as oil. MeOH (2.0 mL) was used for the synthesis of **5ab**. *n*-BuOH/toluene (1:1, 2.0 mL) was used for the synthesis of **5ac**.

**Procedure for  $B(C_6F_5)_3$  catalyzed three component reactions of **1**, **2** and nucleophiles**

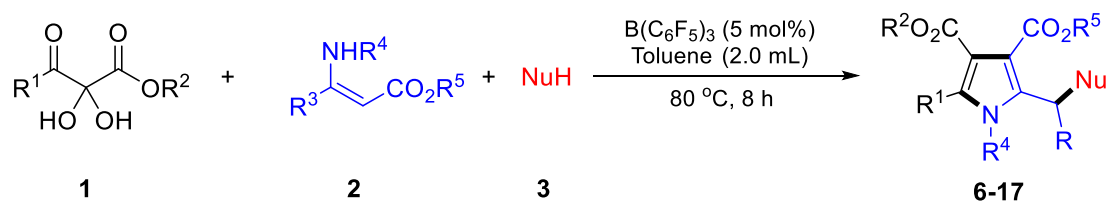

Under air atmosphere, a Schlenk tube with a magnetic stir bar charged with 2,3-diketoester **1** (0.2 mmol), enamine **2** (0.24 mmol, 1.2 equiv.), nucleophilic reagents **3** (0.6 mmol, 3.0 equiv.), toluene (2.0 mL) and  $B(C_6F_5)_3$  (0.01 mmol, 5mol%). After being stirred for corresponding time at 80°C, the solvent was removed from the reaction mixture under vacuum and the crude reaction mixture was purified by medium pressure chromatography to give pure products **6-17**.

### Procedure for B(C<sub>6</sub>F<sub>5</sub>)<sub>3</sub> catalyzed three component reactions of **1a**, **18** and **19**

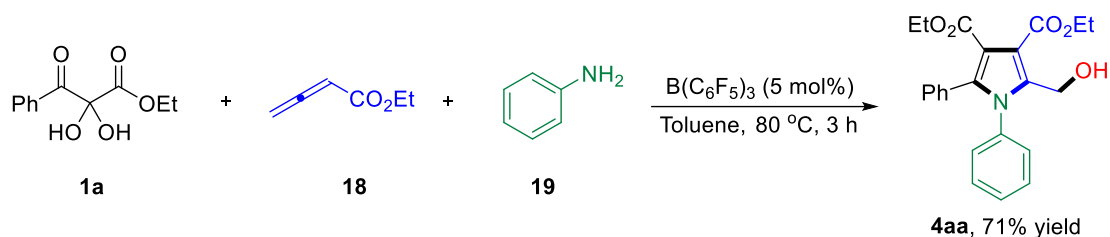

Under air atmosphere, a Schlenk tube with a magnetic stir bar charged with 2,3-diketoester **1a** (0.2 mmol), ethyl buta-2,3-dienoate **18** (0.24 mmol, 1.2 equiv.), aniline **19** (0.24 mmol, 1.2 equiv.), toluene (2.0 mL) and B(C<sub>6</sub>F<sub>5</sub>)<sub>3</sub> (0.01 mmol, 5mol%). After being stirred for 3h at 80°C, the mixture was cooled down to room temperature and poured into 10% Na<sub>2</sub>CO<sub>3</sub> solution (10 mL), and the resultant mixture was extracted with EtOAc (3×10 mL). The organic layers were combined, washed with brine (2×20 mL), dried over Na<sub>2</sub>SO<sub>4</sub>. At this time, the solvent was removed from the reaction mixture under vacuum and the crude reaction mixture was purified by medium pressure chromatography to give **4aa** in 71% yield.

### Procedure for B(C<sub>6</sub>F<sub>5</sub>)<sub>3</sub> catalyzed three component reactions of **1a**, **19** and **20**

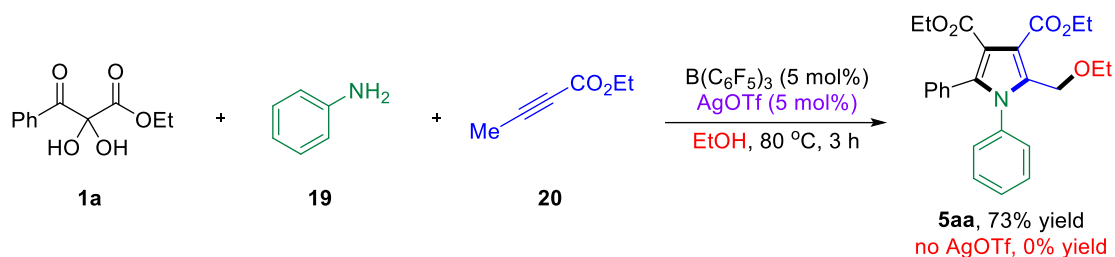

Under air atmosphere, a Schlenk tube with a magnetic stir bar charged with 2,3-diketoester **1a** (0.2 mmol), aniline **19** (0.24 mmol, 1.2 equiv.), ethyl but-2-ynoate **20** (0.24 mmol, 1.2 equiv.), ethanol (2.0 mL), AgOTf (0.01 mmol, 5mol%) and B(C<sub>6</sub>F<sub>5</sub>)<sub>3</sub> (0.01 mmol, 5mol%). After being stirred for 3h at 80°C, the mixture was cooled down to room temperature and poured into 10% Na<sub>2</sub>CO<sub>3</sub> solution (10 mL), and the resultant mixture was extracted with EtOAc (3×10 mL). The organic layers were combined, washed with brine (2×20 mL), dried over Na<sub>2</sub>SO<sub>4</sub>. At this time, the solvent was removed from the reaction mixture under vacuum and the crude reaction mixture was purified by medium pressure chromatography to give **5aa** in 73% yield.

### Procedure for B(C<sub>6</sub>F<sub>5</sub>)<sub>3</sub> catalyzed three component reactions of **1a**, **19** and **21**

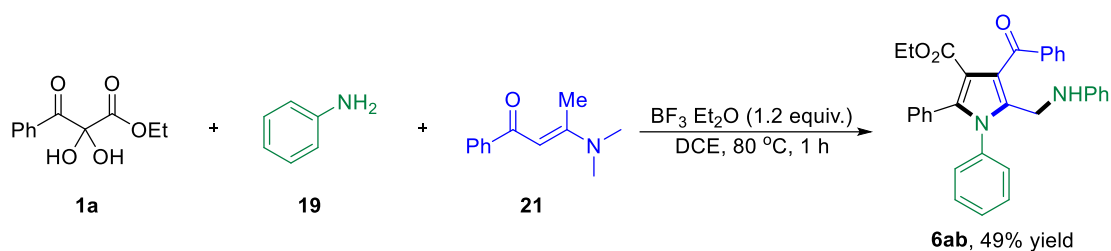

Under air atmosphere, a Schlenk tube with a magnetic stir bar charged with 2,3-diketoester **1a** (0.2 mmol), aniline **19** (0.4 mmol, 2.0 equiv.), (*E*)-3-(dimethylamino)-1-phenylbut-2-en-1-one **21** (0.2 mmol, 1.0 equiv.), DCE (2.0 mL) and BF<sub>3</sub>·Et<sub>2</sub>O (0.24 mmol, 1.2 equiv.). After being stirred for 1h at 80°C, the mixture was cooled down to room temperature and poured into 10% Na<sub>2</sub>CO<sub>3</sub> solution (10 mL), and the resultant mixture was extracted with EtOAc (3×10 mL). The organic layers were combined, washed with brine (2×20 mL), dried over Na<sub>2</sub>SO<sub>4</sub>. At this time, the solvent was removed from the reaction mixture under vacuum and the crude reaction mixture was purified by medium pressure chromatography to give **6ab** in 49% yield.

### General procedure for gram-scale synthesis of **4a**

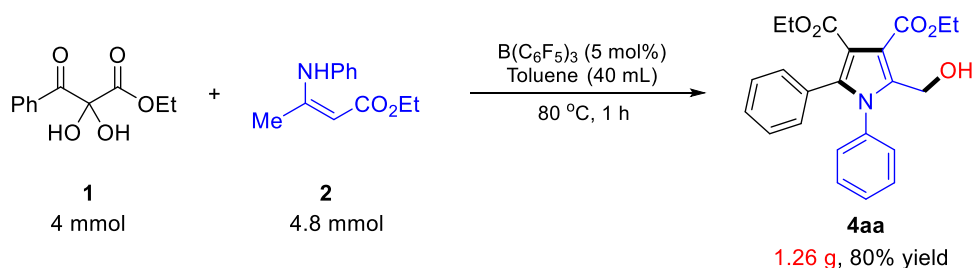

Under air atmosphere, a Schlenk tube with a magnetic stir bar charged with ethyl 2,2-dihydroxy-3-oxo-3-phenylpropanoate **1a** (4 mmol, 0.896 g), ethyl (*Z*)-3-(phenylamino)but-2-enoate **2a** (0.24 mmol, 1.2 equiv.), toluene (40 mL) and B(C<sub>6</sub>F<sub>5</sub>)<sub>3</sub> (0.2 mmol, 102.4 mg, 5 mol%). After being stirred for 1h at 80°C, the mixture was cooled down to room temperature and poured into 10% Na<sub>2</sub>CO<sub>3</sub> solution (100 mL), and the resultant mixture was extracted with EtOAc (3×50 mL). The organic layers were combined, washed with brine (2×100 mL), dried over Na<sub>2</sub>SO<sub>4</sub>. At this time, the solvent was removed from the reaction mixture under vacuum and the crude reaction mixture was purified by medium pressure chromatography to give **4aa** as colorless oil (1.26 g, 80% yield).

## Characterization data of 1,3-dicarbonyl compounds

### But-3-yn-1-yl 3-oxobutanoate (19) <sup>[3]</sup>

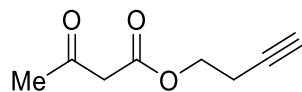

Light yellow oil;

<sup>1</sup>H NMR (500 MHz, CDCl<sub>3</sub>) δ 4.24 (t, *J* = 6.8 Hz, 2H), 3.47 (s, 2H), 2.54 (td, *J* = 6.8 Hz, 2.6 Hz, 2H), 2.27 (s, 3H), 1.99 (t, *J* = 2.6 Hz, 1H);

<sup>13</sup>C NMR (125 MHz, CDCl<sub>3</sub>) δ 200.4, 166.9, 79.8, 70.2, 63.0, 50.0, 30.3, 18.9.

### 2-Cyanoethyl 3-oxobutanoate (20) <sup>[2]</sup>

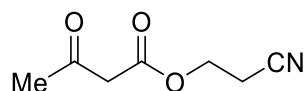

Light yellow oil, *R<sub>f</sub>* = 0.28 (PE/EtOAc = 2:1);

<sup>1</sup>H NMR (500 MHz, CDCl<sub>3</sub>) δ 4.34 (t, *J* = 6.3 Hz, 2H), 3.52 (s, 2H), 2.73 (t, *J* = 6.3 Hz, 2H), 2.27 (s, 3H);

<sup>13</sup>C NMR (125 MHz, CDCl<sub>3</sub>) δ 200.0, 166.6, 116.7, 59.5, 49.7, 30.4, 18.0.

### (5*R*,5*aR*,8*aR*,9*R*)-8-Oxo-9-(3,4,5-trimethoxyphenyl)-5,5*a*,6,8,8*a*,9-hexahydrofuro[3',4':6,7]

### naphtho[2,3-*d*][1,3]dioxol-5-yl 3-oxobutanoate (23)

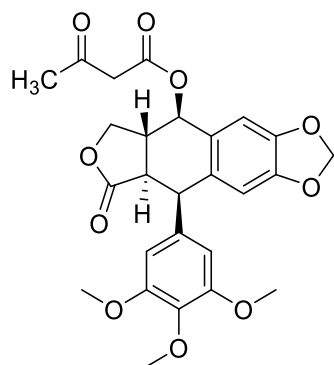

White solid, m.p. 133-135 °C, *R<sub>f</sub>* = 0.14 (PE/EtOAc = 2:1);

<sup>1</sup>H NMR (500 MHz, CDCl<sub>3</sub>) δ 6.83 (s, 1H), 6.51 (s, 1H), 6.35 (s, 2H), 5.96-5.93 (m, 3H), 4.58 (d, *J* = 2.0 Hz, 1H), 4.46-4.43 (m, 1H), 4.21-4.17 (m, 1H), 3.79-3.78 (m, 3H), 3.72 (s, 6H), 3.61 (d, *J* = 16.2 Hz, 1H), 3.57 (d, *J* = 16.2 Hz, 1H), 2.93-2.83 (m, 2H), 2.27 (s, 3H);

<sup>13</sup>C NMR (101 MHz, CDCl<sub>3</sub>) δ 200.0, 173.6, 167.6, 152.7, 148.2, 147.6, 137.3, 134.8, 132.4,

127.9, 109.7, 108.2, 107.1, 101.6, 74.6, 71.3, 60.8, 56.2, 50.1, 45.5, 43.7, 38.6, 30.4;

HRMS (ESI)  $m/z$  calculated for  $[C_{26}H_{26}O_{10}+Na]^+$   $[M+Na]^+$  521.1418, found: 521.1424.

**((2*S*,5*R*)-5-(5-Methyl-2,4-dioxo-3,4-dihydropyrimidin-1(2*H*)-yl)-2,5-dihydrofuran-2-yl)methyl 3-oxobutanoate (25)**

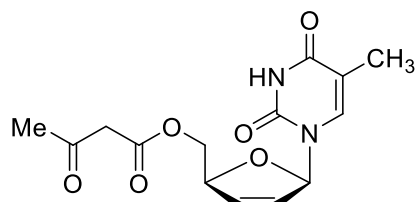

White solid, m.p. 191-193 °C,  $R_f$  = 0.32 (EtOAc);

$^1H$  NMR (500 MHz,  $CDCl_3$ )  $\delta$  9.18 (s, 1H), 7.12 (s, 1H), 6.97 (d,  $J$  = 1.6 Hz, 1H), 6.28 (d,  $J$  = 5.9 Hz, 1H), 5.91 (d,  $J$  = 5.6 Hz, 1H), 5.02 (s, 1H), 4.42 (dd,  $J$  = 12.2 Hz, 4.8 Hz, 1H), 4.27 (dd,  $J$  = 12.1 Hz, 3.1 Hz, 1H), 3.51 (d,  $J$  = 15.8 Hz, 1H), 3.44 (d,  $J$  = 15.8 Hz, 1H), 2.25 (s, 3H), 1.89 (s, 3H);

$^{13}C$  NMR (101 MHz,  $CDCl_3$ )  $\delta$  200.1, 166.8, 163.9, 150.9, 135.4, 133.2, 127.5, 111.3, 90.0, 84.0, 65.6, 49.9, 30.4, 12.6;

HRMS (ESI)  $m/z$  calculated for  $[C_{14}H_{16}N_2O_6+H]^+$   $[M+H]^+$  309.1081, found: 309.1082.

**Characterization data of enamines 2**

**Ethyl (Z)-3-((4-(cyanomethyl)phenyl)amino)but-2-enoate (9)**

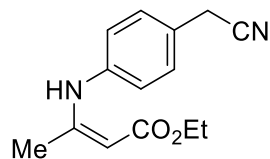

Light yellow solid, m.p. 112-114 °C,  $R_f$  = 0.11 (PE/EtOAc = 10:1);

$^1H$  NMR (500 MHz,  $CDCl_3$ )  $\delta$  10.4 (s, 1H), 7.25 (d,  $J$  = 8.3 Hz, 2H), 7.05 (d,  $J$  = 8.4 Hz, 2H), 4.69 (s, 1H), 4.11 (q,  $J$  = 7.1 Hz, 2H), 3.70 (s, 2H), 1.98 (s, 3H), 1.25 (t,  $J$  = 7.1 Hz, 3H);

$^{13}C$  NMR (125 MHz,  $CDCl_3$ )  $\delta$  170.4, 158.4, 139.4, 128.8, 126.2, 124.6, 117.9, 87.0, 59.0, 23.1, 20.4, 14.7;

HRMS (ESI)  $m/z$  calculated for  $[C_{14}H_{16}N_2O_2+H]^+$   $[M+H]^+$  245.1285, found: 245.1287.

**Ethyl (Z)-3-((4-(methylthio)phenyl)amino)but-2-enoate (10)**

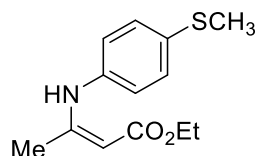

Light yellow solid, m.p. 137-139 °C,  $R_f$  = 0.56 (PE/EtOAc = 10:1);

$^1\text{H NMR}$  (500 MHz,  $\text{CDCl}_3$ )  $\delta$  10.30 (s, 1H), 7.19 (d,  $J$  = 8.6 Hz, 2H), 6.99 (d,  $J$  = 8.5 Hz, 2H), 4.66 (s, 1H), 4.12 (q,  $J$  = 7.1 Hz, 2H), 2.45 (s, 3H), 1.95 (s, 3H), 1.26 (t,  $J$  = 7.1 Hz, 3H);

$^{13}\text{C NMR}$  (125 MHz,  $\text{CDCl}_3$ )  $\delta$  170.5, 159.0, 136.7, 134.8, 127.6, 125.1, 86.1, 58.9, 20.4, 16.4, 14.7;

HRMS (ESI)  $m/z$  calculated for  $[\text{C}_{13}\text{H}_{17}\text{NO}_2\text{S}+\text{H}]^+$   $[\text{M}+\text{H}]^+$  252.1053, found: 252.1052.

#### Ethyl (Z)-3-((7-hydroxynaphthalen-1-yl)amino)but-2-enoate (14)

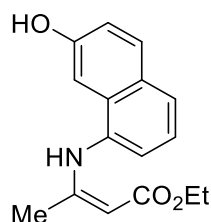

Light yellow solid, m.p. 173-175 °C,  $R_f$  = 0.21 (PE/EtOAc = 10:1);

$^1\text{H NMR}$  (500 MHz,  $\text{CDCl}_3$ )  $\delta$  10.37 (s, 1H), 7.70 (d,  $J$  = 8.9 Hz, 1H), 7.62 (d,  $J$  = 7.7 Hz, 1H), 7.38 (d,  $J$  = 1.8 Hz, 1H), 7.24-7.19 (m, 2H), 7.15 (dd,  $J$  = 8.8 Hz, 2.3 Hz, 1H), 6.46 (brs, 1H), 4.80 (s, 1H), 4.20 (q,  $J$  = 7.1 Hz, 2H), 1.82 (s, 3H), 1.29 (t,  $J$  = 7.1 Hz, 3H);

$^{13}\text{C NMR}$  (125 MHz,  $\text{CDCl}_3$ )  $\delta$  171.5, 161.8, 155.8, 133.5, 132.0, 130.3, 129.4, 126.8, 124.4, 122.5, 119.0, 104.3, 84.9, 59.3, 20.2, 14.6;

HRMS (ESI)  $m/z$  calculated for  $[\text{C}_{16}\text{H}_{17}\text{NO}_3+\text{H}]^+$   $[\text{M}+\text{H}]^+$  272.1281, found: 272.1282.

#### Ethyl (Z)-3-((5-hydroxynaphthalen-1-yl)amino)but-2-enoate (15)

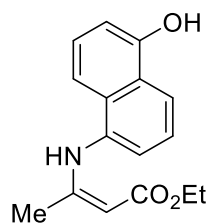

Light yellow solid, m.p. 187-188 °C,  $R_f$  = 0.15 (PE/EtOAc = 10:1);

$^1\text{H NMR}$  (500 MHz,  $\text{CDCl}_3$ )  $\delta$  10.38 (s, 1H), 8.14 (d,  $J$  = 8.4 Hz, 1H), 7.39-7.32 (m, 2H), 7.18 (d,  $J$  = 7.2 Hz, 1H), 7.08-7.05 (m, 1H), 6.86 (d,  $J$  = 7.5 Hz, 1H), 6.70 (brs, 1H), 4.82 (s, 1H), 4.26 (q,  $J$  = 7.1 Hz, 2H), 1.83 (s, 3H), 1.34 (t,  $J$  = 7.1 Hz, 3H);

$^{13}\text{C}$  NMR (125 MHz,  $\text{CDCl}_3$ )  $\delta$  171.5, 161.6, 152.6, 134.7, 131.9, 126.9, 125.8, 124.32, 124.26, 121.1, 114.5, 109.4, 85.2, 59.4, 20.2, 14.7;

HRMS (ESI)  $m/z$  calculated for  $[\text{C}_{16}\text{H}_{17}\text{NO}_3+\text{H}]^+$   $[\text{M}+\text{H}]^+$  272.1281, found: 272.1283.

**Ethyl (Z)-3-((1H-indol-5-yl)amino)but-2-enoate (16)**

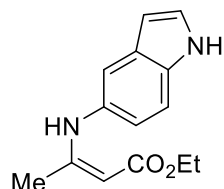

Light yellow solid, m.p. 163-164 °C,  $R_f$  = 0.12 (PE/EtOAc = 10:1);

$^1\text{H}$  NMR (500 MHz,  $\text{CDCl}_3$ )  $\delta$  10.27 (s, 1H), 8.35 (s, 1H), 7.36 (s, 1H), 7.32 (d,  $J$  = 8.5 Hz, 1H), 7.32 (t,  $J$  = 2.7 Hz, 1H), 6.93 (dd,  $J$  = 8.5 Hz, 1.9 Hz, 1H), 6.51 (t,  $J$  = 2.1 Hz, 1H), 4.66 (s, 1H), 4.16 (q,  $J$  = 7.1 Hz, 2H), 1.90 (s, 3H), 1.29 (t,  $J$  = 7.1 Hz, 3H);

$^{13}\text{C}$  NMR (125 MHz,  $\text{CDCl}_3$ )  $\delta$  179.8, 161.1, 134.1, 131.7, 128.1, 125.5, 121.1, 117.9, 111.3, 102.8, 83.9, 58.7, 20.4, 14.8;

HRMS (ESI)  $m/z$  calculated for  $[\text{C}_{14}\text{H}_{16}\text{N}_2\text{O}_2+\text{H}]^+$   $[\text{M}+\text{H}]^+$  245.1285, found: 245.1283.

**Allyl (Z)-3-(phenylamino)but-2-enoate (24)**

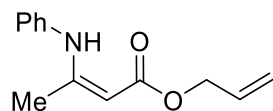

Colorless oil,  $R_f$  = 0.74 (PE/EtOAc = 10:1);

$^1\text{H}$  NMR (500 MHz,  $\text{CDCl}_3$ )  $\delta$  10.36 (brs, 1H), 7.34-7.31 (m, 2H), 7.17-7.14 (m, 1H), 7.09 (d,  $J$  = 7.6 Hz, 2H), 6.02-5.94 (m, 1H), 5.34 (dq,  $J$  = 17.2 Hz, 1.6 Hz, 1H), 5.22 (dq,  $J$  = 10.5 Hz, 1.3 Hz, 1H), 4.74 (d,  $J$  = 0.4 Hz, 1H), 4.61 (dt,  $J$  = 5.6 Hz, 1.5 Hz, 2H), 2.00 (s, 3H);

$^{13}\text{C}$  NMR (125 MHz,  $\text{CDCl}_3$ )  $\delta$  170.0, 159.5, 139.3, 133.4, 129.2, 125.2, 124.6, 117.4, 85.6, 63.7, 20.5;

HRMS (ESI)  $m/z$  calculated for  $[\text{C}_{13}\text{H}_{15}\text{NO}_2+\text{H}]^+$   $[\text{M}+\text{H}]^+$  218.1176, found: 218.1174.

**But-3-yn-1-yl (Z)-3-(phenylamino)but-2-enoate (25)**

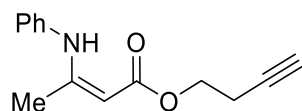

Colorless oil,  $R_f = 0.61$  (PE/EtOAc = 10:1);

$^1\text{H}$  NMR (500 MHz,  $\text{CDCl}_3$ )  $\delta$  10.32 (s, 1H), 7.34-7.31 (m, 2H), 7.18-7.15 (m, 1H), 7.08 (d,  $J = 7.6$  Hz, 2H), 4.72 (s, 1H), 4.21 (t,  $J = 6.9$  Hz, 2H), 2.56 (td,  $J = 6.9$  Hz, 2.7 Hz, 2H), 2.01 (t,  $J = 2.7$  Hz, 1H), 1.99 (s, 3H);

$^{13}\text{C}$  NMR (125 MHz,  $\text{CDCl}_3$ )  $\delta$  170.0, 159.7, 139.2, 129.2, 125.2, 124.7, 85.5, 80.8, 69.8, 60.8, 20.4, 19.4;

HRMS (ESI)  $m/z$  calculated for  $[\text{C}_{14}\text{H}_{15}\text{NO}_2 + \text{H}]^+$   $[\text{M} + \text{H}]^+$  230.1176, found: 230.1175.

### 2-Cyanoethyl (Z)-3-(phenylamino)but-2-enoate (26)

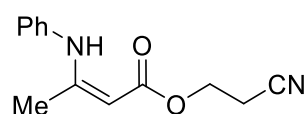

White solid, m.p. 103-105 °C,  $R_f = 0.12$  (PE/EtOAc = 10:1);

$^1\text{H}$  NMR (500 MHz,  $\text{CDCl}_3$ )  $\delta$  10.26 (s, 1H), 7.35-7.32 (m, 2H), 7.20-7.17 (m, 1H), 7.09 (d,  $J = 7.8$  Hz, 2H), 4.72 (s, 1H), 4.29 (t,  $J = 6.4$  Hz, 2H), 2.72 (t,  $J = 6.4$  Hz, 2H), 1.99 (s, 3H);

$^{13}\text{C}$  NMR (125 MHz,  $\text{CDCl}_3$ )  $\delta$  169.4, 160.7, 138.9, 129.2, 125.6, 124.9, 117.5, 84.8, 57.3, 20.4, 18.5;

HRMS (ESI)  $m/z$  calculated for  $[\text{C}_{13}\text{H}_{14}\text{N}_2\text{O}_2 + \text{H}]^+$   $[\text{M} + \text{H}]^+$  231.1128, found: 231.1126.

### (1R,2S,5R)-2-isopropyl-5-methylcyclohexyl (Z)-3-(phenylamino)but-2-enoate (27)

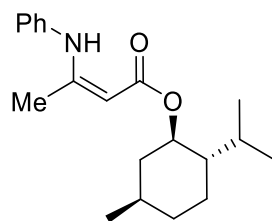

White solid, m.p. 187-189 °C,  $R_f = 0.74$  (PE/EtOAc = 10:1);

$^1\text{H}$  NMR (500 MHz,  $\text{CDCl}_3$ )  $\delta$  10.42 (s, 1H), 7.31-7.28 (m, 2H), 7.14-7.11 (m, 1H), 7.07 (d,  $J = 7.8$  Hz, 2H), 4.70 (dd,  $J = 10.8$  Hz, 4.2 Hz, 1H), 4.67 (s, 1H), 2.06-2.03 (m, 1H), 1.99 (s, 3H), 1.96-1.94 (m, 1H), 1.68-1.63 (m, 2H), 1.51-1.50 (m, 1H), 1.40-1.35 (m, 1H), 1.09-0.98 (m, 2H), 0.90-0.86 (m, 7H), 0.79 (d,  $J = 6.9$  Hz, 3H);

$^{13}\text{C}$  NMR (125 MHz,  $\text{CDCl}_3$ )  $\delta$  170.2, 158.8, 139.5, 129.1, 124.8, 124.3, 86.5, 72.3, 47.3, 41.6, 34.5, 31.6, 26.4, 23.7, 22.2, 20.9, 20.5, 16.6;



HRMS (ESI)  $m/z$  calculated for  $[C_{20}H_{29}NO_2+H]^+$   $[M+H]^+$  316.2271, found: 316.2276.

**(3*S*,5*S*,8*R*,9*S*,10*S*,13*R*,14*S*,17*R*)-10,13-dimethyl-17-((*R*)-6-methylheptan-2-yl)hexadecahydro-1*H*-cyclopenta[*a*]phenanthren-3-yl (*Z*)-3-(phenylamino)but-2-enoate (28)**

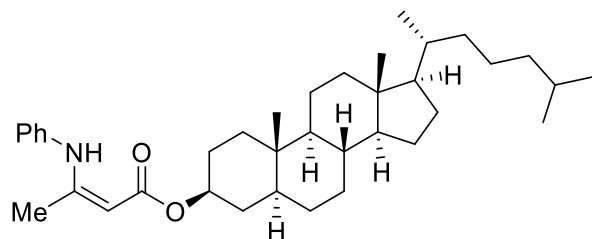

White solid, m.p. 201-203 °C,  $R_f$  = 0.77 (PE/EtOAc = 10:1);

$^1H$  NMR (500 MHz,  $CDCl_3$ )  $\delta$  10.43 (s, 1H), 7.33-7.30 (m, 2H), 7.15-7.12 (m, 1H), 7.08 (d,  $J$  = 7.7 Hz, 2H), 4.75-4.69 (m, 1H), 4.66 (s, 1H), 2.00 (s, 3H), 1.96 (dt,  $J$  = 12.7 Hz, 3.4 Hz, 1H), 1.85-1.78 (m, 2H), 1.74 (dt,  $J$  = 13.3 Hz, 3.4 Hz, 1H), 1.66-1.62 (m, 2H), 1.56-1.47 (m, 4H), 1.40-1.21 (m, 10H), 1.16-0.97 (m, 10H), 0.90 (d,  $J$  = 6.5 Hz, 3H), 0.87 (d,  $J$  = 2.3 Hz, 3H), 0.85 (d,  $J$  = 2.3 Hz, 3H), 0.83 (s, 3H), 0.67-0.62 (m, 4H);

$^{13}C$  NMR (125 MHz,  $CDCl_3$ )  $\delta$  170.1, 158.9, 139.5, 129.1, 124.9, 124.3, 86.6, 72.1, 56.5, 56.3, 54.3, 44.9, 42.7, 40.1, 39.6, 37.0, 36.3, 35.9, 35.61, 35.57, 34.6, 32.1, 28.8, 28.4, 28.1, 28.0, 24.3, 23.9, 22.9, 22.7, 21.3, 20.5, 18.8, 12.4, 12.2;

HRMS (ESI)  $m/z$  calculated for  $[C_{37}H_{57}NO_2+H]^+$   $[M+H]^+$  548.4462, found: 548.4466.

**(3*R*,4*S*,5*R*,6*R*)-3,4,5-Tris(benzyloxy)-6-((benzyloxy)methyl)tetrahydro-2*H*-pyran-2-yl (*Z*)-3-(phenylamino)but-2-enoate (29)**

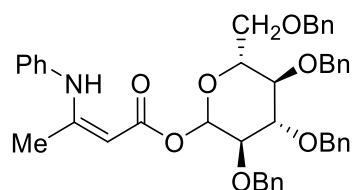

White solid, m.p. 183-185 °C,  $R_f$  = 0.20 (PE/EtOAc = 10:1);

$^1H$  NMR (500 MHz,  $CDCl_3$ )  $\delta$  10.45 (s, 1H), 7.42-7.29 (m, 2H), 7.22-7.18 (m, 2H), 7.13 (d,  $J$  = 7.6 Hz, 2H), 6.47 (d,  $J$  = 3.5 Hz, 1H), 5.05 (d,  $J$  = 10.9 Hz, 1H), 4.92-4.88 (m, 2H), 4.82-4.80 (m, 2H), 4.72 (d,  $J$  = 11.8 Hz, 1H), 4.67 (d,  $J$  = 12.2 Hz, 1H), 4.55 (d,  $J$  = 10.6 Hz, 1H), 4.51 (d,  $J$  = 12.1 Hz, 1H), 4.12-4.08 (m, 1H), 3.98 (d,  $J$  = 10.0 Hz, 1H), 3.85 (d,  $J$  = 9.7 Hz, 1H), 3.84-3.77 (m, 2H), 3.71 (dd,  $J$  = 10.8 Hz, 1.6 Hz, 1H), 2.03 (s, 3H);

$^{13}\text{C}$  NMR (125 MHz,  $\text{CDCl}_3$ )  $\delta$  168.6, 161.0, 139.1, 139.0, 138.4, 138.1, 138.0, 129.3, 128.58, 128.56, 128.5, 128.24, 128.19, 128.13, 128.08, 128.0, 127.90, 127.86, 127.8, 125.5, 124.8, 88.7, 85.4, 82.2, 79.0, 75.9, 75.4, 73.7, 72.9, 72.4, 68.3, 20.5;

HRMS (ESI)  $m/z$  calculated for  $[\text{C}_{44}\text{H}_{45}\text{NO}_7+\text{H}]^+$   $[\text{M}+\text{H}]^+$  700.3269, found: 700.3273.

**((2*S*,5*R*)-5-(5-Methyl-2,4-dioxo-3,4-dihydropyrimidin-1(2*H*)-yl)-2,5-dihydrofuran-2-yl)methyl (Z)-3-(phenylamino)but-2-enoate (30)**

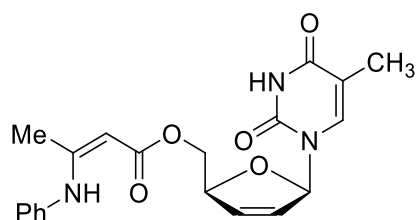

White solid, m.p. 235-237 °C,  $R_f$  = 0.55 (EtOAc);

$^1\text{H}$  NMR (500 MHz,  $\text{CDCl}_3$ )  $\delta$  10.30 (s, 1H), 9.18 (s, 1H), 7.37 (s, 1H), 7.34-7.30 (m, 2H), 7.19-7.16 (m, 1H), 7.07 (d,  $J$  = 8.1 Hz, 2H), 7.01 (d,  $J$  = 1.6 Hz, 1H), 6.30 (d,  $J$  = 5.9 Hz, 1H), 5.84 (d,  $J$  = 4.9 Hz, 1H), 5.04 (s, 1H), 4.64 (s, 1H), 4.48 (dd,  $J$  = 12.5 Hz, 2.9 Hz, 1H), 4.25 (dd,  $J$  = 12.6 Hz, 2.2 Hz, 1H), 1.96 (s, 3H), 1.94 (s, 3H);

$^{13}\text{C}$  NMR (125 MHz,  $\text{CDCl}_3$ )  $\delta$  169.5, 164.1, 160.5, 151.0, 138.9, 136.2, 133.8, 129.3, 127.0, 125.6, 124.8, 110.9, 89.7, 85.1, 84.8, 62.8, 20.4, 12.6;

HRMS (ESI)  $m/z$  calculated for  $[\text{C}_{20}\text{H}_{21}\text{N}_3\text{O}_5+\text{H}]^+$   $[\text{M}+\text{H}]^+$  384.1554, found: 384.1557.

**(5*R*,5*aR*,8*aR*,9*R*)-8-Oxo-9-(3,4,5-trimethoxyphenyl)-5,5*a*,6,8,8*a*,9-hexahydrofuro[3',4':6,7]naphtho[2,3-*d*][1,3]dioxol-5-yl (Z)-3-(phenylamino)but-2-enoate (31)**

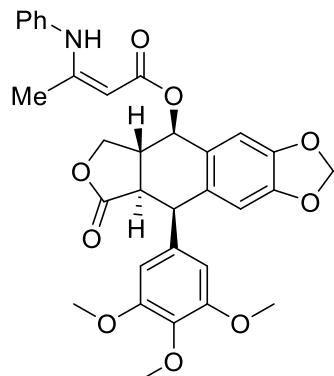

White solid, m.p. 193-195 °C,  $R_f$  = 0.53 (PE/EtOAc = 2:1);

$^1\text{H}$  NMR (500 MHz,  $\text{CDCl}_3$ )  $\delta$  10.31 (s, 1H), 7.34-7.31 (m, 2H), 7.19-7.16 (m, 1H), 7.10-7.09 (m, 2H), 6.85 (s, 1H), 6.49 (s, 1H), 6.40 (s, 2H), 5.94-5.93 (m, 2H), 5.89 (d,  $J = 8.8$  Hz, 1H), 4.73 (s, 1H), 4.57 (d,  $J = 3.9$  Hz, 1H), 4.45-4.42 (m, 1H), 4.23-4.19 (m, 1H), 3.78 (s, 3H), 3.74 (s, 6H), 2.93-2.82 (m, 2H), 1.99 (s, 3H);

$^{13}\text{C}$  NMR (125 MHz,  $\text{CDCl}_3$ )  $\delta$  174.2, 170.3, 160.7, 152.6, 147.9, 147.6, 138.9, 135.3, 132.1, 129.8, 129.3, 125.7, 124.9, 109.6, 108.2, 107.4, 101.6, 84.8, 71.9, 71.7, 60.8, 56.2, 45.7, 43.9, 39.0, 20.4;

HRMS (ESI)  $m/z$  calculated for  $[\text{C}_{32}\text{H}_{31}\text{NO}_9+\text{H}]^+$   $[\text{M}+\text{H}]^+$  574.2072, found: 574.2076.

### Ethyl (Z)-3-((2-(1H-indol-3-yl)ethyl)amino)but-2-enoate (32)

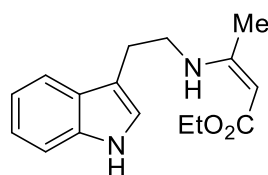

Colorless oil,  $R_f = 0.50$  (PE/EtOAc = 3:1);

$^1\text{H}$  NMR (500 MHz,  $\text{CDCl}_3$ )  $\delta$  8.67 (s, 1H), 8.22 (s, 1H), 7.57 (d,  $J = 7.9$  Hz, 1H), 7.34-7.32 (m, 1H), 7.20-7.17 (m, 1H), 7.14-7.10 (m, 1H), 7.03 (d,  $J = 2.3$  Hz, 1H), 4.43 (s, 1H), 4.09 (q,  $J = 7.1$  Hz, 2H), 3.51 (q,  $J = 7.0$  Hz, 2H), 3.00 (t,  $J = 7.1$  Hz, 2H), 1.84 (d,  $J = 0.5$  Hz, 3H), 1.24 (t,  $J = 7.1$  Hz, 3H);

$^{13}\text{C}$  NMR (125 MHz,  $\text{CDCl}_3$ )  $\delta$  170.8, 162.0, 136.4, 127.2, 122.5, 122.1, 119.5, 118.5, 112.5, 111.4, 82.1, 58.4, 43.6, 26.6, 19.6, 14.8;

HRMS (ESI)  $m/z$  calculated for  $[\text{C}_{16}\text{H}_{20}\text{N}_2\text{O}_2+\text{H}]^+$   $[\text{M}+\text{H}]^+$  273.1598, found: 273.1603.

### Ethyl (Z)-3-((2-oxo-4-(trifluoromethyl)-2H-chromen-7-yl)amino)but-2-enoate (33)

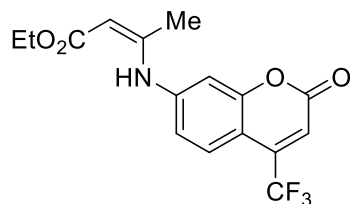

Yellow solid, m.p. 177-179  $^{\circ}\text{C}$ ,  $R_f = 0.48$  (PE/EtOAc = 10:1);

$^1\text{H}$  NMR (500 MHz,  $\text{CDCl}_3$ )  $\delta$  10.90 (s, 1H), 7.60 (dd,  $J = 8.8$  Hz, 1.7 Hz, 1H), 7.06 (d,  $J = 2.2$  Hz, 1H), 6.97 (dd,  $J = 8.8$  Hz, 2.3 Hz, 1H), 6.64 (s, 1H), 4.86 (s, 1H), 4.16 (q,  $J = 7.1$  Hz, 2H), 2.22 (s, 3H), 1.28 (t,  $J = 7.1$  Hz, 3H);

$^{13}\text{C}$  NMR (125 MHz,  $\text{CDCl}_3$ )  $\delta$  170.1, 159.2, 155.8, 155.6, 144.5, 141.4 (q,  $J = 32.7$  Hz), 126.2 (q,  $J = 2.4$  Hz), 122.7, 118.5, 113.2 (q,  $J = 5.7$  Hz), 108.7, 108.2, 91.7, 59.6, 21.2, 14.5.

$^{19}\text{F}$  NMR (470 MHz,  $\text{CDCl}_3$ )  $\delta$  -64.60;

HRMS (ESI)  $m/z$  calculated for  $[\text{C}_{16}\text{H}_{14}\text{F}_3\text{NO}_4+\text{H}]^+$   $[\text{M}+\text{H}]^+$  342.0948, found: 342.0952.

**3-Ethyl 5-methyl (Z)-4-(2-chlorophenyl)-2-((2-((4-ethoxy-4-oxobut-2-en-2-yl)amino)ethoxy) methyl)-6-methyl-1,4-dihydropyridine-3,5-dicarboxylate (34)**

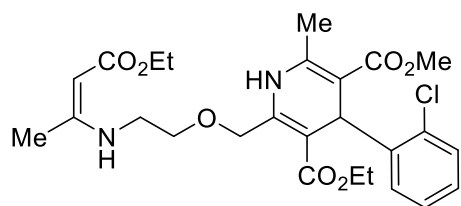

Light yellow solid, m.p. 241-243 °C,  $R_f = 0.31$  (PE/EtOAc = 3:1);

$^1\text{H}$  NMR (500 MHz,  $\text{CDCl}_3$ )  $\delta$  8.98 (s, 1H), 7.38 (dd,  $J = 7.8$  Hz, 1.6 Hz, 1H), 7.21 (dd,  $J = 8.0$  Hz, 1.3 Hz, 1H), 7.14-7.10 (m, 2H), 7.04-7.02 (m, 1H), 5.39 (s, 1H), 4.79 (d,  $J = 15.8$  Hz, 1H), 4.71 (d,  $J = 15.8$  Hz, 1H), 4.52 (s, 1H), 4.08-4.02 (m, 4H), 3.60 (s, 3H), 3.47 (q,  $J = 5.5$  Hz, 2H), 2.36 (s, 3H), 1.94 (s, 3H), 1.22 (t,  $J = 7.2$  Hz, 3H), 1.17 (t,  $J = 7.2$  Hz, 3H);

$^{13}\text{C}$  NMR (125 MHz,  $\text{CDCl}_3$ )  $\delta$  170.9, 168.1, 167.3, 161.5, 145.9, 145.0, 144.7, 132.3, 131.6, 129.2, 127.4, 127.0, 103.9, 101.9, 83.5, 70.2, 68.0, 59.9, 58.6, 50.9, 42.3, 37.1, 19.5, 19.2, 14.7, 14.4;

HRMS (ESI)  $m/z$  calculated for  $[\text{C}_{26}\text{H}_{33}\text{ClN}_2\text{O}_7+\text{H}]^+$   $[\text{M}+\text{H}]^+$  521.2049, found: 521.2048.

**Characterization data of pyrrole products 4-17**

**Diethyl 2-(hydroxymethyl)-1,5-diphenyl-1H-pyrrole-3,4-dicarboxylate (4aa)**

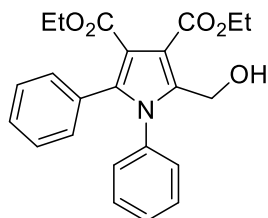

68.4 mg, 87% yield, white solid, m.p. 134-136 °C,  $R_f = 0.31$  (PE/EtOAc = 3:1);

$^1\text{H}$  NMR (500 MHz,  $\text{CDCl}_3$ )  $\delta$  7.32-7.29 (m, 3H), 7.18-7.09 (m, 7H), 4.48 (d,  $J = 4.8$  Hz, 2H), 4.35 (q,  $J = 7.1$  Hz, 2H), 4.17 (q,  $J = 7.2$  Hz, 2H), 3.76 (t,  $J = 5.9$  Hz, 1H), 1.36 (t,  $J = 7.2$  Hz, 3H), 1.16 (t,  $J = 7.2$  Hz, 3H);

$^{13}\text{C}$  NMR (125 MHz,  $\text{CDCl}_3$ )  $\delta$  165.8, 165.6, 139.8, 136.1, 135.0, 130.6, 130.0, 129.2, 128.9, 128.5, 128.2, 127.8, 116.4, 113.4, 61.0, 55.2, 14.3, 14.1;

HRMS (ESI)  $m/z$  calculated for  $[\text{C}_{23}\text{H}_{23}\text{NO}_5+\text{H}]^+$   $[\text{M}+\text{H}]^+$  394.1649, found: 394.1654.

**Diethyl 2-(4-fluorophenyl)-5-(hydroxymethyl)-1-phenyl-1H-pyrrole-3,4-dicarboxylate (4ba)**

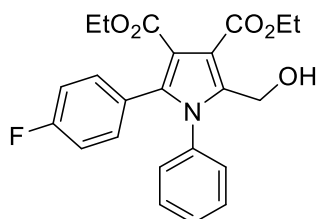

55.9 mg, 68% yield, light yellow solid, m.p. 166-168 °C,  $R_f$  = 0.26 (PE/EtOAc = 3:1);

$^1\text{H}$  NMR (500 MHz,  $\text{CDCl}_3$ )  $\delta$  7.34-7.31 (m, 3H), 7.13-7.09 (m, 4H), 6.88-6.84 (m, 2H), 4.47 (d,  $J$  = 6.5 Hz, 2H), 4.35 (q,  $J$  = 7.2 Hz, 2H), 4.18 (q,  $J$  = 7.1 Hz, 2H), 3.74 (t,  $J$  = 6.9 Hz, 1H), 1.36 (t,  $J$  = 7.1 Hz, 3H), 1.18 (t,  $J$  = 7.2 Hz, 3H);

$^{13}\text{C}$  NMR (125 MHz,  $\text{CDCl}_3$ )  $\delta$  165.6, 165.5, 162.5 (d,  $J$  = 247.1 Hz), 139.8, 135.9, 134.1, 132.6 (d,  $J$  = 8.3 Hz), 129.3, 129.0, 128.5, 126.0 (d,  $J$  = 3.4 Hz), 116.5, 115.0 (d,  $J$  = 21.6 Hz), 113.6, 61.1, 61.0, 55.2, 14.3, 14.1;

$^{19}\text{F}$  NMR (470 MHz,  $\text{CDCl}_3$ )  $\delta$  112.56;

HRMS (ESI)  $m/z$  calculated for  $[\text{C}_{23}\text{H}_{22}\text{FNO}_5+\text{H}]^+$   $[\text{M}+\text{H}]^+$  412.1555, found: 412.1563.

**Diethyl 2-(4-chlorophenyl)-5-(hydroxymethyl)-1-phenyl-1H-pyrrole-3,4-dicarboxylate (4ca)**

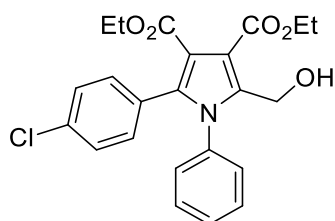

50.5 mg, 59% yield, light yellow solid, m.p. 162-164 °C,  $R_f$  = 0.25 (PE/EtOAc = 3:1);

$^1\text{H}$  NMR (500 MHz,  $\text{CDCl}_3$ )  $\delta$  7.33-7.31 (m, 3H), 7.13 (d,  $J$  = 8.7 Hz, 2H), 7.10-7.08 (m, 2H), 7.06 (d,  $J$  = 8.7 Hz, 2H), 4.46 (d,  $J$  = 7.1 Hz, 2H), 4.34 (q,  $J$  = 7.2 Hz, 2H), 4.17 (q,  $J$  = 7.2 Hz, 2H), 3.72 (t,  $J$  = 7.2 Hz, 1H), 1.34 (t,  $J$  = 7.2 Hz, 3H), 1.18 (t,  $J$  = 7.2 Hz, 3H);

$^{13}\text{C}$  NMR (125 MHz,  $\text{CDCl}_3$ )  $\delta$  165.5, 165.4, 140.0, 135.9, 134.4, 133.7, 131.9, 129.4, 129.1, 128.47, 128.46, 128.2, 116.7, 113.7, 61.12, 61.08, 55.1, 14.3, 14.1;

HRMS (ESI)  $m/z$  calculated for  $[\text{C}_{23}\text{H}_{22}\text{ClNO}_5+\text{H}]^+$   $[\text{M}+\text{H}]^+$  428.1259, found: 428.1267.

**Diethyl 2-(4-bromophenyl)-5-(hydroxymethyl)-1-phenyl-1H-pyrrole-3,4-dicarboxylate (4da)**

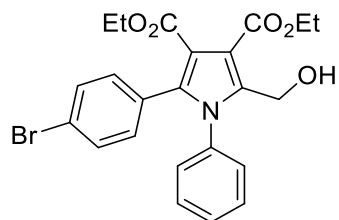

49.7 mg, 53% yield, light yellow solid, m.p. 180-182 °C,  $R_f = 0.28$  (PE/EtOAc = 3:1);

$^1\text{H NMR}$  (500 MHz,  $\text{CDCl}_3$ )  $\delta$  7.36-7.34 (m, 3H), 7.30 (d,  $J = 8.7$  Hz, 2H), 7.11-7.09 (m, 2H), 7.01 (d,  $J = 8.7$  Hz, ); 4.48 (d,  $J = 5.7$  Hz, 2H), 4.36 (q,  $J = 7.1$  Hz, 2H), 4.19 (q,  $J = 7.1$  Hz, 2H), 3.72 (t,  $J = 6.5$  Hz, 1H), 1.37 (t,  $J = 7.1$  Hz, 3H), 1.21 (t,  $J = 7.1$  Hz, 3H);

$^{13}\text{C NMR}$  (125 MHz,  $\text{CDCl}_3$ )  $\delta$  165.6, 165.4, 140.0, 135.9, 133.7, 132.1, 131.1, 129.5, 129.1, 128.9, 128.5, 122.7, 116.7, 113.7, 61.2, 61.1, 55.2, 14.3, 14.2;

HRMS (ESI)  $m/z$  calculated for  $[\text{C}_{23}\text{H}_{22}\text{BrNO}_5 + \text{H}]^+$   $[\text{M} + \text{H}]^+$  472.0754, found: 472.0761.

**Diethyl 2-(hydroxymethyl)-1-phenyl-5-(p-tolyl)-1H-pyrrole-3,4-dicarboxylate (4ea)**

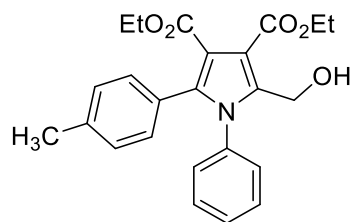

46.4 mg, 57% yield, light yellow solid, m.p. 151-152 °C,  $R_f = 0.31$  (PE/EtOAc = 3:1);

$^1\text{H NMR}$  (500 MHz,  $\text{CDCl}_3$ )  $\delta$  7.33-7.30 (m, 3H), 7.13-7.10 (m, 2H), 7.02 (d,  $J = 8.2$  Hz), 6.96 (d,  $J = 8.0$  Hz, 2H), 4.48 (d,  $J = 6.7$  Hz, 2H), 4.35 (q,  $J = 7.2$  Hz, 2H), 4.18 (q,  $J = 7.2$  Hz, 2H), 3.77 (t,  $J = 7.0$  Hz, 1H), 2.24 (s, 3H), 1.36 (t,  $J = 7.2$  Hz, 3H), 1.19 (t,  $J = 7.2$  Hz, 3H);

$^{13}\text{C NMR}$  (125 MHz,  $\text{CDCl}_3$ )  $\delta$  165.9, 165.6, 139.7, 138.1, 136.2, 135.1, 130.4, 129.2, 128.8, 128.6, 128.5, 126.9, 116.2, 113.4, 61.00, 60.97, 55.2, 21.3, 14.3, 14.1;

HRMS (ESI)  $m/z$  calculated for  $[\text{C}_{24}\text{H}_{25}\text{NO}_5 + \text{H}]^+$   $[\text{M} + \text{H}]^+$  408.1805, found: 408.1808.

**Diethyl 2-(hydroxymethyl)-5-(4-methoxyphenyl)-1-phenyl-1H-pyrrole-3,4-dicarboxylate (4fa)**

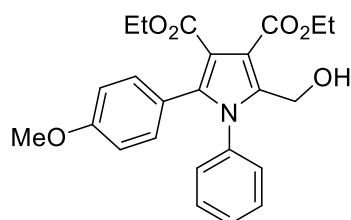

35.5 mg, 42% yield, colorless oil,  $R_f = 0.21$  (PE/EtOAc = 3:1);

$^1\text{H NMR}$  (500 MHz,  $\text{CDCl}_3$ )  $\delta$  7.31-7.30 (m, 3H), 7.10-7.08 (m, 2H), 7.05 (d,  $J = 8.8$  Hz, 2H), 6.68 (d,  $J = 8.8$  Hz, 2H), 4.46 (s, 2H), 4.34 (q,  $J = 7.2$  Hz, 2H), 4.17 (q,  $J = 7.2$  Hz, 2H), 3.74 (brs, 1H), 3.71 (s, 3H), 1.35 (t,  $J = 7.2$  Hz, 3H), 1.19 (t,  $J = 7.2$  Hz, 3H);

$^{13}\text{C NMR}$  (125 MHz,  $\text{CDCl}_3$ )  $\delta$  165.9, 165.7, 159.4, 139.5, 136.2, 135.1, 132.0, 129.2, 128.8, 128.5, 122.2, 116.0, 113.4, 113.3, 61.0, 55.3, 55.2, 14.3, 14.2;

HRMS (ESI)  $m/z$  calculated for  $[\text{C}_{24}\text{H}_{25}\text{NO}_6 + \text{H}]^+$   $[\text{M} + \text{H}]^+$  424.1755, found: 424.1760.

**Diethyl 2-(2-bromophenyl)-5-(hydroxymethyl)-1-phenyl-1H-pyrrole-3,4-dicarboxylate (4ga)**

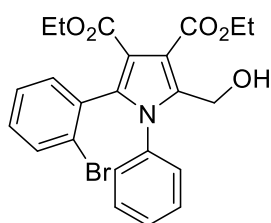

57.5 mg, 61% yield, light yellow solid, m.p. 171-173 °C,  $R_f = 0.25$  (PE/EtOAc = 3:1);

$^1\text{H NMR}$  (500 MHz,  $\text{CDCl}_3$ )  $\delta$  7.37 (dd,  $J = 8.0$  Hz, 1.1 Hz, 1H), 7.25-7.20 (m, 4H), 7.14-7.07 (m, 2H), 7.04-7.01 (m, 2H), 4.39 (d,  $J = 6.7$  Hz, 2H), 4.30 (q,  $J = 7.2$  Hz, 2H), 4.02 (q,  $J = 7.2$  Hz, 2H), 3.68 (t,  $J = 7.0$  Hz, 1H), 1.31 (t,  $J = 7.2$  Hz, 3H), 0.96 (t,  $J = 7.2$  Hz, 3H);

$^{13}\text{C NMR}$  (125 MHz,  $\text{CDCl}_3$ )  $\delta$  165.9, 164.2, 139.6, 135.7, 133.4, 132.3, 132.2, 130.4, 129.0, 128.2, 126.6, 125.9, 116.1, 114.0, 61.2, 60.5, 55.2, 14.3, 13.9;

HRMS (ESI)  $m/z$  calculated for  $[\text{C}_{23}\text{H}_{22}\text{BrNO}_5 + \text{H}]^+$   $[\text{M} + \text{H}]^+$  472.0754, found: 472.0758.

**Diethyl 2-(3-bromophenyl)-5-(hydroxymethyl)-1-phenyl-1H-pyrrole-3,4-dicarboxylate (4ha)**

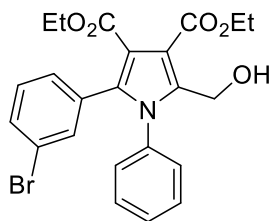

60.3 mg, 64% yield, light yellow solid, m.p. 177-179 °C,  $R_f = 0.29$  (PE/EtOAc = 3:1);

$^1\text{H NMR}$  (500 MHz,  $\text{CDCl}_3$ )  $\delta$  7.36-7.34 (m, 1H), 7.33-7.31 (m, 1H), 7.12-7.10 (m, 2H), 7.03-6.98 (m, 2H), 4.48 (d,  $J = 6.2$  Hz, 2H), 4.35 (q,  $J = 7.2$  Hz, 2H), 4.20 (q,  $J = 7.3$  Hz, 2H), 3.75 (t,  $J = 6.8$  Hz, 1H), 1.36 (t,  $J = 7.3$  Hz, 3H), 1.21 (t,  $J = 7.3$  Hz, 3H);

$^{13}\text{C}$  NMR (125 MHz,  $\text{CDCl}_3$ )  $\delta$  165.42, 165.40, 140.1, 135.8, 133.5, 133.1, 132.0, 131.3, 129.4, 129.3, 129.2, 129.1, 128.5, 121.8, 117.0, 113.7, 61.2, 61.1, 55.1, 14.3, 14.2;

HRMS (ESI)  $m/z$  calculated for  $[\text{C}_{23}\text{H}_{22}\text{BrNO}_5+\text{Na}]^+$   $[\text{M}+\text{Na}]^+$  494.0574, found: 494.0588.

**Diethyl 2-(hydroxymethyl)-5-(3-methoxyphenyl)-1-phenyl-1H-pyrrole-3,4-dicarboxylate (4ia)**

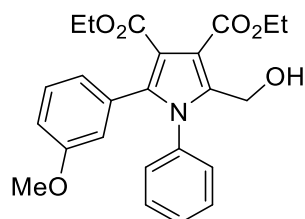

30.1 mg, 36% yield, colorless oil,  $R_f$  = 0.22 (PE/EtOAc = 3:1);

$^1\text{H}$  NMR (500 MHz,  $\text{CDCl}_3$ )  $\delta$  7.33-7.31 (m, 3H), 7.12-7.11 (m, 2H), 7.10-7.04 (m, 1H), 6.73-6.70 (m, 2H), 6.65-6.64 (m, 1H), 4.49 (d,  $J$  = 7.1 Hz, 2H), 4.34 (q,  $J$  = 7.2 Hz, 2H), 4.19 (q,  $J$  = 7.2 Hz, 2H), 3.77 (q,  $J$  = 7.2 Hz, 1H), 3.58 (s, 3H), 1.35 (t,  $J$  = 7.2 Hz, 3H), 1.19 (t,  $J$  = 7.2 Hz, 3H);

$^{13}\text{C}$  NMR (125 MHz,  $\text{CDCl}_3$ )  $\delta$  165.9, 165.5, 158.9, 139.9, 136.2, 134.5, 131.1, 129.3, 128.90, 128.89, 128.5, 123.0, 116.6, 115.5, 114.5, 113.3, 61.1, 61.0, 55.2, 55.1, 14.3, 14.1;

HRMS (ESI)  $m/z$  calculated for  $[\text{C}_{24}\text{H}_{25}\text{NO}_6+\text{H}]^+$   $[\text{M}+\text{H}]^+$  424.1755, found: 424.1757.

**Diethyl 2-(hydroxymethyl)-1-phenyl-5-(3-(trifluoromethyl)phenyl)-1H-pyrrole-3,4-dicarboxylate (4ja)**

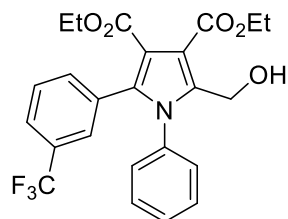

70.1 mg, 76% yield, white solid, m.p. 152-154 °C,  $R_f$  = 0.33 (PE/EtOAc = 3:1);

$^1\text{H}$  NMR (500 MHz,  $\text{CDCl}_3$ )  $\delta$  7.45-7.42 (m, 2H), 7.34-7.33 (m, 3H), 7.29-7.27 (m, 2H), 7.11-7.09 (m, 2H), 4.49 (s, 2H), 4.35 (q,  $J$  = 7.1 Hz, 2H), 4.18 (q,  $J$  = 7.2 Hz, 2H), 3.73 (brs, 1H), 1.36 (t,  $J$  = 7.1 Hz, 3H), 1.18 (t,  $J$  = 7.2 Hz, 3H);

$^{13}\text{C}$  NMR (125 MHz,  $\text{CDCl}_3$ )  $\delta$  165.39, 165.37, 140.3, 135.7, 133.8 (q,  $J$  = 1.2 Hz), 133.1, 130.8, 130.3 (q,  $J$  = 32.4 Hz), 129.5, 129.2, 128.5, 128.4, 127.5 (q,  $J$  = 3.9 Hz), 124.9 (q,  $J$  = 3.7 Hz), 123.8 (q,  $J$  = 270.7 Hz), 117.1, 113.8, 61.23, 61.15, 55.1, 14.3, 14.0;

$^{19}\text{F}$  NMR (470 MHz,  $\text{CDCl}_3$ )  $\delta$  -63.84;



HRMS (ESI)  $m/z$  calculated for  $[C_{24}H_{22}F_3NO_5+H]^+$   $[M+H]^+$  462.1523, found: 462.1532.

**Diethyl 2-(hydroxymethyl)-5-(naphthalen-2-yl)-1-phenyl-1H-pyrrole-3,4-dicarboxylate (4ka)**

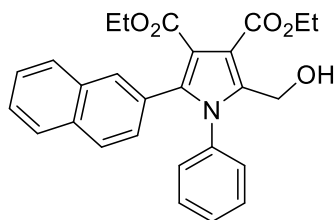

38.1 mg, 43% yield, white solid, m.p. 144-145 °C,  $R_f$  = 0.26 (PE/EtOAc = 3:1);

$^1H$  NMR (500 MHz,  $CDCl_3$ )  $\delta$  7.76 (d,  $J$  = 1.2 Hz, 1H), 7.74-7.69 (m, 2H), 7.59 (d,  $J$  = 8.6 Hz, 1H), 7.46-7.42 (m, 2H), 7.31-7.28 (m, 3H), 7.17-7.15 (m, 2H), 7.12 (dd,  $J$  = 8.5 Hz, 1.8 Hz, 1H), 4.54 (d,  $J$  = 6.3 Hz, 2H), 4.38 (q,  $J$  = 7.2 Hz, 2H), 4.17 (q,  $J$  = 7.2 Hz, 2H), 3.80 (t,  $J$  = 6.9 Hz, 1H), 1.39 (t,  $J$  = 7.2 Hz, 3H), 1.15 (t,  $J$  = 7.2 Hz, 3H);

$^{13}C$  NMR (125 MHz,  $CDCl_3$ )  $\delta$  165.9, 165.6, 140.0, 136.1, 134.7, 132.74, 132.69, 130.4, 129.3, 128.9, 128.5, 128.2, 127.7, 127.6, 127.43, 127.38, 126.7, 126.3, 116.9, 113.5, 61.10, 61.05, 55.3, 14.3, 14.1;

HRMS (ESI)  $m/z$  calculated for  $[C_{27}H_{25}NO_5+H]^+$   $[M+H]^+$  444.1805, found: 444.1809.

**Diethyl 2-(hydroxymethyl)-5-(naphthalen-1-yl)-1-phenyl-1H-pyrrole-3,4-dicarboxylate (4la)**

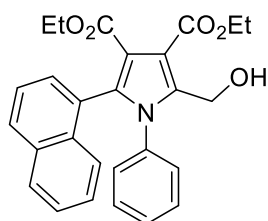

37.2 mg, 42% yield, colorless oil,  $R_f$  = 0.25 (PE/EtOAc = 3:1);

$^1H$  NMR (500 MHz,  $CDCl_3$ )  $\delta$  7.74 (m, 2H), 7.67-7.65 (m, 1H), 7.40-7.38 (m, 2H), 7.28-7.25 (m, 2H), 7.23-7.14 (m, 2H), 7.12-7.09 (m, 1H), 6.98-6.92 (m, 2H), 4.52 (s, 2H), 4.39 (q,  $J$  = 7.2 Hz, 2H), 3.90-3.85 (m, 3H), 1.38 (t,  $J$  = 7.2 Hz, 3H), 0.72 (t,  $J$  = 7.2 Hz, 3H);

$^{13}C$  NMR (125 MHz,  $CDCl_3$ )  $\delta$  166.0, 164.8, 139.8, 136.0, 134.5, 133.4, 133.1, 130.1, 129.3, 128.9, 128.7, 128.2, 128.1, 126.5, 125.95, 125.92, 124.6, 117.3, 113.9, 61.1, 60.4, 55.4, 14.3, 13.6;

HRMS (ESI)  $m/z$  calculated for  $[C_{27}H_{25}NO_5+H]^+$   $[M+H]^+$  444.1805, found: 444.1809.

**Ethyl 4-benzoyl-2-(hydroxymethyl)-1,5-diphenyl-1H-pyrrole-3-carboxylate (4ma)**

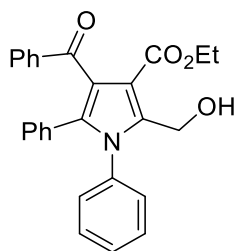

33.2 mg, 39% yield, white solid, m.p. 177-178 °C,  $R_f$  = 0.31 (PE/EtOAc = 3:1);

$^1\text{H}$  NMR (500 MHz,  $\text{CDCl}_3$ )  $\delta$  7.89-7.87 (m, 2H), 7.51-7.48 (m, 1H), 7.41-7.38 (m, 2H), 7.36-7.35 (m, 3H), 7.19-7.17 (m, 2H), 7.10-7.06 (m, 5H), 4.59 (d,  $J$  = 6.2 Hz, 2H), 4.20 (t,  $J$  = 7.0 Hz, 1H), 3.95 (q,  $J$  = 7.2 Hz, 2H), 0.80 (t,  $J$  = 7.2 Hz, 3H);

$^{13}\text{C}$  NMR (125 MHz,  $\text{CDCl}_3$ )  $\delta$  193.7, 165.6, 140.3, 139.0, 136.2, 134.4, 132.8, 130.6, 129.8, 129.4, 129.3, 128.9, 128.6, 128.4, 128.0, 127.9, 123.0, 113.8, 60.7, 55.5, 13.4;

HRMS (ESI)  $m/z$  calculated for  $[\text{C}_{27}\text{H}_{23}\text{NO}_4+\text{H}]^+$   $[\text{M}+\text{H}]^+$  426.1700, found: 426.1710.

**Diethyl 1-(4-fluorophenyl)-2-(hydroxymethyl)-5-phenyl-1H-pyrrole-3,4-dicarboxylate (4ab)**

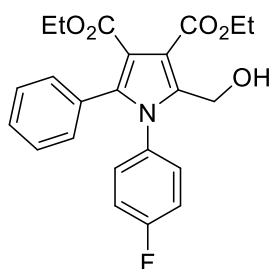

50.2 mg, 61% yield, colorless oil,  $R_f$  = 0.27 (PE/EtOAc = 3:1);

$^1\text{H}$  NMR (500 MHz,  $\text{CDCl}_3$ )  $\delta$  7.20-7.15 (m, 3H), 7.12-7.08 (m, 4H), 7.01-6.97 (m, 2H), 4.47 (d,  $J$  = 6.8 Hz, 2H), 4.34 (q,  $J$  = 7.2 Hz, 2H), 4.15 (q,  $J$  = 7.2 Hz, 2H), 3.68 (t,  $J$  = 6.9 Hz, 1H), 1.35 (t,  $J$  = 7.2 Hz, 3H), 1.14 (t,  $J$  = 7.2 Hz, 3H);

$^{13}\text{C}$  NMR (125 MHz,  $\text{CDCl}_3$ )  $\delta$  165.6, 165.4, 162.3 (d,  $J$  = 248.2 Hz), 139.7, 135.2, 132.1 (d,  $J$  = 3.3 Hz), 130.6, 130.3 (d,  $J$  = 8.7 Hz), 129.8, 128.4, 128.0, 116.5, 116.3 (d,  $J$  = 22.8 Hz), 113.6, 61.06, 61.04, 55.1, 14.3, 14.1;

$^{19}\text{F}$  NMR (470 MHz,  $\text{CDCl}_3$ )  $\delta$  111.41;

HRMS (ESI)  $m/z$  calculated for  $[\text{C}_{23}\text{H}_{22}\text{FNO}_5+\text{H}]^+$   $[\text{M}+\text{H}]^+$  412.1555, found: 412.1553.

**Diethyl 1-(4-chlorophenyl)-2-(hydroxymethyl)-5-phenyl-1H-pyrrole-3,4-dicarboxylate (4ac)**

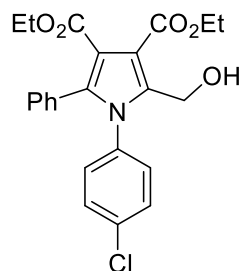

63.7 mg, 75% yield, colorless oil,  $R_f = 0.31$  (PE/EtOAc = 3:1);

$^1\text{H NMR}$  (500 MHz,  $\text{CDCl}_3$ )  $\delta$  7.27 (d,  $J = 8.8$  Hz, 2H), 7.21-7.16 (m, 3H), 7.12-7.10 (m, 2H), 7.05 (d,  $J = 8.8$  Hz, 2H), 4.46 (d,  $J = 6.2$  Hz, 2H), 4.33 (q,  $J = 7.2$  Hz, 2H), 4.15 (q,  $J = 7.2$  Hz, 2H), 3.68 (t,  $J = 6.7$  Hz, 1H), 1.34 (t,  $J = 7.2$  Hz, 3H), 1.14 (t,  $J = 7.2$  Hz, 3H);

$^{13}\text{C NMR}$  (125 MHz,  $\text{CDCl}_3$ )  $\delta$  165.5, 165.4, 139.5, 135.0, 134.8, 134.7, 130.6, 129.8, 129.7, 129.5, 128.5, 128.0, 116.6, 113.8, 61.09, 61.07, 55.0, 14.3, 14.1;

HRMS (ESI)  $m/z$  calculated for  $[\text{C}_{23}\text{H}_{22}\text{ClNO}_5 + \text{H}]^+$   $[\text{M} + \text{H}]^+$  428.1259, found: 428.1262.

**Diethyl 1-(4-bromophenyl)-2-(hydroxymethyl)-5-phenyl-1H-pyrrole-3,4-dicarboxylate (4ad)**

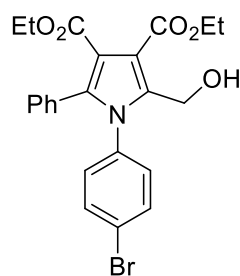

72.5 mg, 77% yield, colorless oil,  $R_f = 0.28$  (PE/EtOAc = 3:1);

$^1\text{H NMR}$  (500 MHz,  $\text{CDCl}_3$ )  $\delta$  7.42 (d,  $J = 8.7$  Hz, 2H), 7.21-7.17 (m, 3H), 7.12-7.10 (m, 2H), 6.98 (d,  $J = 8.7$  Hz, 2H), 4.46 (s, 2H), 4.34 (q,  $J = 7.2$  Hz, 2H), 4.15 (q,  $J = 7.2$  Hz, 2H), 3.66 (s, 1H), 1.34 (t,  $J = 7.2$  Hz, 3H), 1.14 (t,  $J = 7.2$  Hz, 3H);

$^{13}\text{C NMR}$  (125 MHz,  $\text{CDCl}_3$ )  $\delta$  165.5, 165.4, 139.4, 135.2, 135.0, 132.5, 130.6, 130.0, 129.7, 128.5, 128.1, 122.9, 116.7, 113.9, 61.10, 61.07, 55.0, 14.3, 14.1;

HRMS (ESI)  $m/z$  calculated for  $[\text{C}_{23}\text{H}_{22}\text{BrNO}_5 + \text{H}]^+$   $[\text{M} + \text{H}]^+$  472.0754, found: 472.0757.

**Diethyl 2-(hydroxymethyl)-5-phenyl-1-(*p*-tolyl)-1*H*-pyrrole-3,4-dicarboxylate (4ae)**

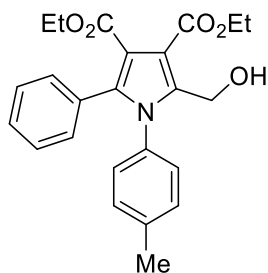

67.0 mg, 82% yield, colorless oil,  $R_f = 0.27$  (PE/EtOAc = 3:1);

$^1\text{H NMR}$  (500 MHz,  $\text{CDCl}_3$ )  $\delta$  7.18-7.12 (m, 5H), 7.09 (d,  $J = 8.2$  Hz, 2H), 6.97 (d,  $J = 8.2$  Hz, 2H), 4.47 (d,  $J = 6.8$  Hz, 2H), 4.34 (q,  $J = 7.2$  Hz, 2H), 4.16 (q,  $J = 7.2$  Hz, 2H), 3.74 (t,  $J = 7.0$  Hz, 1H), 2.31 (s, 3H), 1.35 (t,  $J = 7.2$  Hz, 3H), 1.15 (t,  $J = 7.2$  Hz, 3H);

$^{13}\text{C NMR}$  (125 MHz,  $\text{CDCl}_3$ )  $\delta$  165.9, 165.6, 139.9, 138.9, 135.0, 133.5, 130.6, 130.1, 129.8, 128.2, 128.1, 127.8, 116.3, 113.2, 60.99, 60.98, 55.3, 21.2, 14.3, 14.1;

HRMS (ESI)  $m/z$  calculated for  $[\text{C}_{24}\text{H}_{25}\text{NO}_5 + \text{H}]^+$   $[\text{M} + \text{H}]^+$  408.1805, found: 408.1806.

**Diethyl 2-(hydroxymethyl)-1-(4-methoxyphenyl)-5-phenyl-1*H*-pyrrole-3,4-dicarboxylate (4af)**

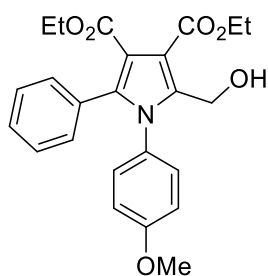

58.3 mg, 69% yield, colorless oil,  $R_f = 0.16$  (PE/EtOAc = 3:1);

$^1\text{H NMR}$  (500 MHz,  $\text{CDCl}_3$ )  $\delta$  7.17-7.11 (m, 5H), 7.01 (d,  $J = 8.9$  Hz, 2H), 6.78 (d,  $J = 8.9$  Hz, 2H), 4.47 (d,  $J = 6.6$  Hz, 2H), 4.33 (q,  $J = 7.1$  Hz, 2H), 4.15 (q,  $J = 7.1$  Hz, 2H), 3.76 (brs, 1H), 3.74 (s, 3H), 1.34 (t,  $J = 7.2$  Hz, 3H), 1.14 (t,  $J = 7.2$  Hz, 3H);

$^{13}\text{C NMR}$  (125 MHz,  $\text{CDCl}_3$ )  $\delta$  165.8, 165.6, 159.6, 140.0, 135.2, 130.6, 130.1, 129.6, 128.8, 128.1, 127.9, 116.2, 114.3, 113.1, 60.973, 60.966, 55.5, 55.2, 14.3, 14.1;

HRMS (ESI)  $m/z$  calculated for  $[\text{C}_{24}\text{H}_{25}\text{NO}_6 + \text{H}]^+$   $[\text{M} + \text{H}]^+$  424.1755, found: 424.1752.

**Diethyl 2-(hydroxymethyl)-1-(4-hydroxyphenyl)-5-phenyl-1H-pyrrole-3,4-dicarboxylate (4ag)**

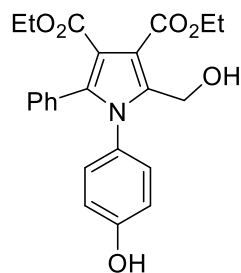

34.0 mg, 42% yield, white solid, m.p. 214-215 °C,  $R_f = 0.37$  (PE/EtOAc = 1:1);

$^1\text{H NMR}$  (500 MHz,  $\text{CDCl}_3$ )  $\delta$  7.97 (brs, 1H), 7.25-7.13 (m, 3H), 7.11-7.09 (m, 2H), 6.84 (d,  $J = 8.7$  Hz, 2H), 6.59 (d,  $J = 8.7$  Hz, 2H), 4.73 (s, 1H), 4.52 (s, 2H), 4.33 (q,  $J = 7.2$  Hz, 2H), 4.16 (q,  $J = 7.2$  Hz, 2H), 1.34 (t,  $J = 7.2$  Hz, 3H), 1.14 (t,  $J = 7.2$  Hz, 3H);

$^{13}\text{C NMR}$  (125 MHz,  $\text{CDCl}_3$ )  $\delta$  166.08, 166.07, 157.1, 139.4, 135.7, 130.5, 129.9, 129.6, 128.3, 127.9, 127.6, 116.01, 115.99, 113.2, 61.27, 61.21, 55.2, 14.3, 14.1;

HRMS (ESI)  $m/z$  calculated for  $[\text{C}_{23}\text{H}_{23}\text{NO}_6 + \text{H}]^+$   $[\text{M} + \text{H}]^+$  410.1598, found: 410.1600.

**Diethyl 2-(hydroxymethyl)-5-phenyl-1-(4-(trifluoromethyl)phenyl)-1H-pyrrole-3,4-dicarboxylate (4ah)**

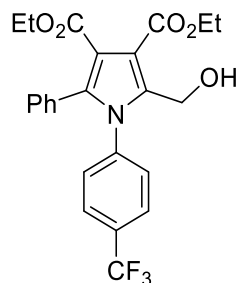

56.5 mg, 61% yield, colorless oil,  $R_f = 0.33$  (PE/EtOAc = 3:1);

$^1\text{H NMR}$  (500 MHz,  $\text{CDCl}_3$ )  $\delta$  7.58 (d,  $J = 8.3$  Hz, 2H), 7.26 (d,  $J = 8.3$  Hz, 2H), 7.22-7.17 (m, 3H), 7.12-7.10 (m, 2H), 4.47 (d,  $J = 4.7$  Hz, 2H), 4.35 (q,  $J = 7.2$  Hz, 2H), 4.16 (q,  $J = 7.2$  Hz, 2H), 3.62 (t,  $J = 5.7$  Hz, 1H), 1.36 (t,  $J = 7.2$  Hz, 3H), 1.15 (t,  $J = 7.2$  Hz, 3H);

$^{13}\text{C NMR}$  (125 MHz,  $\text{CDCl}_3$ )  $\delta$  165.4, 165.3, 139.3, 135.0, 130.9 (q,  $J = 32.9$  Hz), 130.6, 129.5, 129.0, 128.6, 128.1, 126.4 (q,  $J = 3.7$  Hz), 123.5 (q,  $J = 270.8$  Hz), 116.9, 114.3, 61.2, 61.1, 55.0, 14.3, 14.1;

$^{19}\text{F NMR}$  (470 MHz,  $\text{CDCl}_3$ )  $\delta$  62.6;

HRMS (ESI)  $m/z$  calculated for  $[\text{C}_{24}\text{H}_{22}\text{F}_3\text{NO}_5 + \text{H}]^+$   $[\text{M} + \text{H}]^+$  462.1523, found: 462.1525.

**Diethyl 1-(4-(cyanomethyl)phenyl)-2-(hydroxymethyl)-5-phenyl-1H-pyrrole-3,4-dicarboxylate (4ai)**

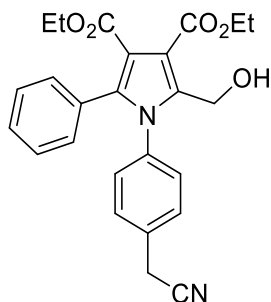

46.7 mg, 54% yield, white solid, m.p. 153-155 °C,  $R_f$  = 0.42 (PE/EtOAc = 1:1);

$^1\text{H}$  NMR (500 MHz,  $\text{CDCl}_3$ )  $\delta$  7.28 (d,  $J$  = 8.3 Hz, 2H), 7.20-7.17 (m, 3H), 7.14-7.09 (m, 4H), 4.46 (d,  $J$  = 2.5 Hz, 2H), 4.34 (q,  $J$  = 7.2 Hz, 2H), 4.15 (q,  $J$  = 7.2 Hz, 2H), 3.72 (s, 2H), 3.65 (brs, 1H), 1.35 (t,  $J$  = 7.2 Hz, 3H), 1.14 (t,  $J$  = 7.2 Hz, 3H);

$^{13}\text{C}$  NMR (125 MHz,  $\text{CDCl}_3$ )  $\delta$  165.6, 165.4, 139.5, 136.1, 135.1, 130.8, 130.6, 129.7, 129.2, 128.8, 128.4, 128.0, 117.3, 116.6, 113.8, 61.09, 61.06, 55.1, 23.4, 14.3, 14.1;

HRMS (ESI)  $m/z$  calculated for  $[\text{C}_{25}\text{H}_{24}\text{N}_2\text{O}_5+\text{H}]^+$   $[\text{M}+\text{H}]^+$  433.1758, found: 433.1763.

**Diethyl 2-(hydroxymethyl)-1-(4-(methylthio)phenyl)-5-phenyl-1H-pyrrole-3,4-dicarboxylate (4aj)**

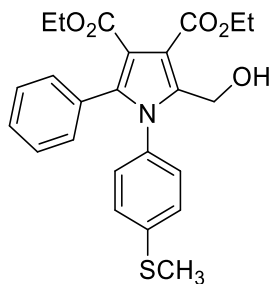

47.4 mg, 54% yield, light yellow solid, m.p. 144-146 °C,  $R_f$  = 0.24 (PE/EtOAc = 3:1);

$^1\text{H}$  NMR (500 MHz,  $\text{CDCl}_3$ )  $\delta$  7.19-7.15 (m, 3H), 7.13-7.11 (m, 4H), 7.00 (d,  $J$  = 8.6 Hz, 2H), 4.47 (d,  $J$  = 6.1 Hz, 2H), 4.33 (q,  $J$  = 7.1 Hz, 2H), 4.15 (q,  $J$  = 7.2 Hz, 2H), 3.70 (t,  $J$  = 6.8 Hz, 1H), 2.42 (s, 3H), 1.34 (t,  $J$  = 7.2 Hz, 3H), 1.14 (t,  $J$  = 7.2 Hz, 3H);

$^{13}\text{C}$  NMR (125 MHz,  $\text{CDCl}_3$ )  $\delta$  165.7, 165.5, 140.1, 139.8, 135.0, 132.8, 130.6, 129.9, 128.7, 128.3, 127.9, 126.3, 116.4, 113.5, 61.0, 55.2, 15.4, 14.3, 14.1;

HRMS (ESI)  $m/z$  calculated for  $[\text{C}_{24}\text{H}_{25}\text{NO}_5\text{S}+\text{H}]^+$   $[\text{M}+\text{H}]^+$  440.1526, found: 440.1533.

**Diethyl 2-(hydroxymethyl)-5-phenyl-1-(o-tolyl)-1H-pyrrole-3,4-dicarboxylate (4ak)**

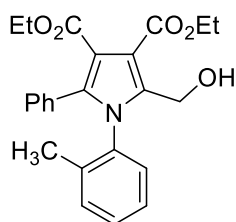

72.3 mg, 89% yield, colorless oil,  $R_f = 0.28$  (PE/EtOAc = 3:1);

$^1\text{H NMR}$  (500 MHz,  $\text{CDCl}_3$ )  $\delta$  7.24-7.21 (m, 1H), 7.17-7.12 (m, 8H), 4.36 (dd,  $J = 7.1$  Hz, 1.2 Hz, 2H), 4.34 (q,  $J = 7.1$  Hz, 2H), 4.20-4.13 (m, 2H), 3.93 (t,  $J = 7.2$  Hz, 1H), 1.89 (s, 3H), 1.35 (t,  $J = 7.2$  Hz, 3H), 1.15 (t,  $J = 7.2$  Hz, 3H);

$^{13}\text{C NMR}$  (125 MHz,  $\text{CDCl}_3$ )  $\delta$  166.0, 165.7, 140.0, 136.5, 135.3, 134.9, 131.1, 130.1, 130.0, 129.6, 129.5, 128.3, 127.8, 126.7, 116.5, 113.1, 61.0, 55.3, 17.6, 14.3, 14.1;

HRMS (ESI)  $m/z$  calculated for  $[\text{C}_{24}\text{H}_{25}\text{NO}_5 + \text{H}]^+$   $[\text{M} + \text{H}]^+$  408.1805, found: 408.1803.

**Diethyl 2-(hydroxymethyl)-1-(3-hydroxyphenyl)-5-phenyl-1H-pyrrole-3,4-dicarboxylate (4al)**

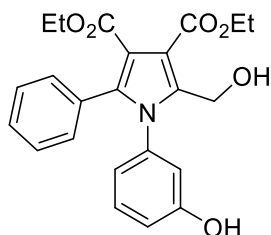

21.3 mg, 26% yield, brown solid, m.p. 190-192 °C,  $R_f = 0.44$  (PE/EtOAc = 1:1);

$^1\text{H NMR}$  (500 MHz,  $\text{CDCl}_3$ )  $\delta$  7.29 (brs, 1H), 7.19-7.14 (m, 3H), 7.12-7.10 (m, 2H), 7.08-7.05 (m, 1H), 6.76-6.73 (m, 1H), 6.63 (t,  $J = 2.0$  Hz, 1H), 6.50-6.48 (m, 1H), 4.61 (d,  $J = 12.6$  Hz, 1H), 4.39-4.32 (m, 4H), 4.16 (q,  $J = 7.2$  Hz, 2H), 1.35 (t,  $J = 7.2$  Hz, 3H), 1.14 (t,  $J = 7.2$  Hz, 3H);

$^{13}\text{C NMR}$  (125 MHz,  $\text{CDCl}_3$ )  $\delta$  166.1, 165.9, 157.0, 139.1, 136.7, 135.3, 130.4, 130.0, 129.8, 128.4, 127.9, 120.1, 116.4, 116.1, 115.8, 113.5, 61.3, 61.2, 55.1, 14.3, 14.1;

HRMS (ESI)  $m/z$  calculated for  $[\text{C}_{23}\text{H}_{23}\text{NO}_6 + \text{H}]^+$   $[\text{M} + \text{H}]^+$  410.1598, found: 410.1603.

**Diethyl 2-(hydroxymethyl)-1-(naphthalen-1-yl)-5-phenyl-1H-pyrrole-3,4-dicarboxylate (4am)**

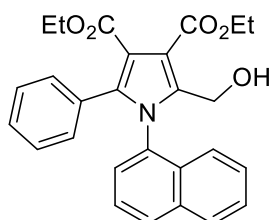

47.5 mg, 54% yield, colorless oil,  $R_f = 0.22$  (PE/EtOAc = 3:1);

$^1\text{H NMR}$  (500 MHz,  $\text{CDCl}_3$ )  $\delta$  7.84-7.81 (m, 2H), 7.48-7.46 (m, 2H), 7.40-7.37 (m, 1H), 7.33-7.32 (m, 2H), 7.06-7.03 (m, 3H), 7.00-6.97 (m, 2H), 4.43-4.36 (m, 3H), 4.21-4.16 (m, 3H), 3.91 (t,  $J = 6.8$  Hz, 1H), 1.39 (t,  $J = 7.2$  Hz, 3H), 1.16 (t,  $J = 7.2$  Hz, 3H);

$^{13}\text{C NMR}$  (125 MHz,  $\text{CDCl}_3$ )  $\delta$  165.9, 165.7, 141.1, 136.1, 133.8, 132.6, 131.2, 129.9, 128.3, 128.2, 127.9, 127.7, 127.4, 127.0, 125.0, 122.5, 116.6, 113.2, 61.12, 61.06, 55.5, 14.3, 14.11, 14.08;

HRMS (ESI)  $m/z$  calculated for  $[\text{C}_{27}\text{H}_{25}\text{NO}_5 + \text{H}]^+$   $[\text{M} + \text{H}]^+$  444.1805, found: 444.1798.

**Diethyl 2-(hydroxymethyl)-1-(7-hydroxynaphthalen-1-yl)-5-phenyl-1H-pyrrole-3,4-dicarboxylate (4an)**

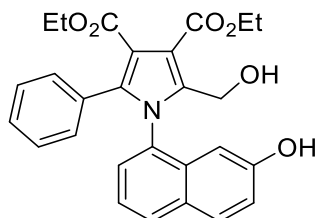

41.4 mg, 45% yield, yellow solid, m.p. 213-215 °C,  $R_f = 0.14$  (PE/EtOAc = 3:1);

$^1\text{H NMR}$  (500 MHz,  $\text{CDCl}_3$ )  $\delta$  7.70 (d,  $J = 7.5$  Hz, 1H), 7.65 (d,  $J = 8.9$  Hz, 1H), 7.17-7.12 (m, 2H), 7.06-7.00 (m, 4H), 7.00-6.95 (m, 2H), 6.66 (d,  $J = 2.0$  Hz, 1H), 4.42-4.29 (m, 5H), 4.22-4.16 (m, 2H), 1.37 (t,  $J = 7.2$  Hz, 3H), 1.15 (t,  $J = 7.2$  Hz, 3H);

$^{13}\text{C NMR}$  (125 MHz,  $\text{CDCl}_3$ )  $\delta$  166.4, 165.9, 156.2, 140.7, 136.2, 132.7, 131.0, 130.2, 129.90, 129.85, 129.7, 129.0, 128.3, 127.8, 127.7, 122.2, 119.5, 116.5, 113.1, 104.3, 61.3, 55.5, 14.3, 14.1;

HRMS (ESI)  $m/z$  calculated for  $[\text{C}_{27}\text{H}_{25}\text{NO}_6 + \text{H}]^+$   $[\text{M} + \text{H}]^+$  460.1755, found: 460.1764.

**Diethyl 2-(hydroxymethyl)-1-(5-hydroxynaphthalen-1-yl)-5-phenyl-1H-pyrrole-3,4-dicarboxylate (4ao)**

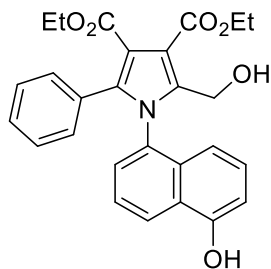

46.0 mg, 50% yield, light yellow solid, m.p. 232-234 °C,  $R_f = 0.64$  (PE/EtOAc = 1:1);

$^1\text{H NMR}$  (500 MHz,  $\text{CDCl}_3$ )  $\delta$  8.14 (d,  $J = 8.2$  Hz, 1H), 7.64 (brs, 1H), 7.25-7.18 (m, 2H), 7.05-



7.00 (m, 4H), 6.98-6.94 (m, 2H), 6.74 (d,  $J = 8.5$  Hz, 1H), 6.30 (d,  $J = 7.5$  Hz, 1H), 4.70 (t,  $J = 6.4$  Hz, 1H), 4.41-4.36 (m, 4H), 4.20 (q,  $J = 7.1$  Hz, 2H), 1.38 (t,  $J = 7.2$  Hz, 3H), 1.16 (t,  $J = 7.2$  Hz, 3H);

$^{13}\text{C}$  NMR (125 MHz,  $\text{CDCl}_3$ )  $\delta$  166.2, 166.1, 152.6, 140.7, 136.4, 132.4, 131.9, 129.9, 129.8, 128.4, 128.3, 127.7, 127.6, 125.2, 124.4, 123.6, 116.4, 113.6, 113.1, 109.2, 61.34, 61.25, 55.4, 14.3, 14.1;

HRMS (ESI)  $m/z$  calculated for  $[\text{C}_{27}\text{H}_{25}\text{NO}_6+\text{H}]^+$   $[\text{M}+\text{H}]^+$  460.1755, found: 460.1759.

#### Diethyl 2-(hydroxymethyl)-1-(1*H*-indol-5-yl)-5-phenyl-1*H*-pyrrole-3,4-dicarboxylate (4ap)

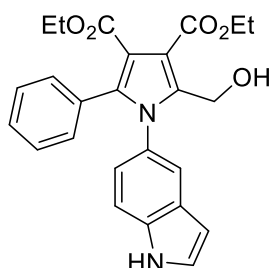

34.6 mg, 40% yield, white solid, m.p. 204-206 °C,  $R_f = 0.39$  (PE/EtOAc = 1:1);

$^1\text{H}$  NMR (500 MHz,  $\text{CDCl}_3$ )  $\delta$  8.98 (s, 1H), 7.33 (d,  $J = 1.7$  Hz, 1H), 7.16-7.13 (m, 3H), 7.09-7.05 (m, 4H), 6.72 (dd,  $J = 8.5$  Hz, 1.9 Hz, 1H), 6.42 (t,  $J = 2.1$  Hz, 1H), 4.56-4.47 (m, 2H), 4.35 (q,  $J = 7.2$  Hz, 2H), 4.19 (q,  $J = 7.2$  Hz, 2H), 4.14 (s, 1H), 1.36 (t,  $J = 7.2$  Hz, 3H), 1.17 (t,  $J = 7.2$  Hz, 3H);

$^{13}\text{C}$  NMR (125 MHz,  $\text{CDCl}_3$ )  $\delta$  166.3, 166.0, 140.6, 135.6, 135.4, 130.4, 130.3, 128.1, 128.0, 127.8, 127.7, 126.3, 121.9, 120.6, 116.0, 112.7, 111.6, 102.9, 61.08, 61.04, 55.4, 14.3, 14.1;

HRMS (ESI)  $m/z$  calculated for  $[\text{C}_{25}\text{H}_{24}\text{N}_2\text{O}_5+\text{H}]^+$   $[\text{M}+\text{H}]^+$  433.1758, found: 433.1763.

#### Diethyl 2-(hydroxymethyl)-1-(1*H*-indol-4-yl)-5-phenyl-1*H*-pyrrole-3,4-dicarboxylate (4aq)

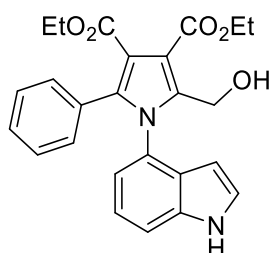

25.1 mg, 29% yield, white solid, m.p. 195-197 °C,  $R_f = 0.43$  (PE/EtOAc = 1:1);

$^1\text{H}$  NMR (500 MHz,  $\text{CDCl}_3$ )  $\delta$  8.71 (s, 1H), 7.25 (d,  $J = 8.2$  Hz, 1H), 7.09-7.07 (m, 2H), 7.06-7.03 (m, 2H), 7.01-6.97 (m, 3H), 6.76 (dd,  $J = 7.5$  Hz, 0.6 Hz, 1H), 6.19 (t,  $J = 2.1$  Hz, 1H), 4.49 (dd,  $J = 13.7$  Hz, 6.5 Hz, 1H), 4.39-4.34 (m, 3H), 4.20 (q,  $J = 7.1$  Hz, 1.6 Hz, 2H), 4.10-4.07 (m, 4H), 1.37

(t,  $J = 7.2$  Hz, 3H), 1.18 (t,  $J = 7.2$  Hz, 3H);

$^{13}\text{C}$  NMR (125 MHz,  $\text{CDCl}_3$ )  $\delta$  166.3, 165.9, 140.8, 136.6, 135.4, 130.3, 129.9, 128.0, 127.6, 126.6, 126.1, 120.3, 116.4, 112.9, 112.3, 99.8, 61.10, 61.04, 55.5, 14.3, 14.1;

HRMS (ESI)  $m/z$  calculated for  $[\text{C}_{25}\text{H}_{24}\text{N}_2\text{O}_5+\text{H}]^+$   $[\text{M}+\text{H}]^+$  433.1758, found: 433.1759.

**Diethyl 1-benzyl-2-(hydroxymethyl)-5-phenyl-1H-pyrrole-3,4-dicarboxylate (4ar)**

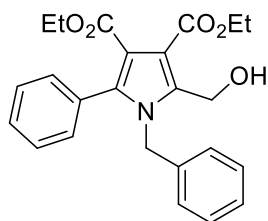

68.8 mg, 85% yield, Colorless oil,  $R_f = 0.18$  (PE/EtOAc = 3:1);

$^1\text{H}$  NMR (500 MHz,  $\text{CDCl}_3$ )  $\delta$  7.34-7.28 (m, 3H), 7.26-7.21 (m, 5H), 6.85 (d,  $J = 7.1$  Hz, 2H), 5.09 (s, 2H), 4.58 (s, 2H), 4.31 (q,  $J = 7.2$  Hz, 2H), 4.08 (q,  $J = 7.2$  Hz, 2H), 3.63 (brs, 1H), 1.33 (t,  $J = 7.2$  Hz, 3H), 3.02 (t,  $J = 7.2$  Hz, 3H);

$^{13}\text{C}$  NMR (125 MHz,  $\text{CDCl}_3$ )  $\delta$  165.6, 165.3, 138.2, 137.0, 136.4, 130.5, 130.2, 128.99, 128.97, 128.3, 127.7, 125.7, 115.9, 113.9, 61.0, 60.7, 55.0, 48.1, 14.3, 14.0;

HRMS (ESI)  $m/z$  calculated for  $[\text{C}_{24}\text{H}_{25}\text{NO}_5+\text{H}]^+$   $[\text{M}+\text{H}]^+$  408.1805, found: 408.1803.

**Diethyl 1-butyl-2-(hydroxymethyl)-5-phenyl-1H-pyrrole-3,4-dicarboxylate (4as)**

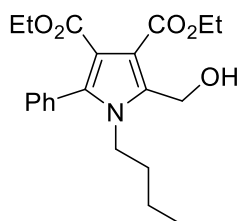

42.9 mg, 58% yield, Colorless oil,  $R_f = 0.22$  (PE/EtOAc = 3:1);

$^1\text{H}$  NMR (500 MHz,  $\text{CDCl}_3$ )  $\delta$  7.41-7.39 (m, 3H), 7.32-7.30 (m, 2H), 4.71 (s, 2H), 4.29 (q,  $J = 7.2$  Hz, 2H), 4.04 (q,  $J = 7.2$  Hz, 2H), 3.81-3.78 (m, 2H), 0.80 (brs, 1H), 1.52-1.46 (m, 2H), 1.31 (t,  $J = 7.2$  Hz, 3H), 1.14-1.08 (m, 2H), 1.03 (t,  $J = 7.2$  Hz, 3H), 0.72 (t,  $J = 7.4$  Hz, 3H);

$^{13}\text{C}$  NMR (125 MHz,  $\text{CDCl}_3$ )  $\delta$  165.8, 165.4, 138.0, 135.6, 130.7, 130.6, 128.9, 128.3, 115.7, 113.3, 60.9, 60.5, 54.9, 44.4, 33.6, 19.7, 14.3, 14.0, 13.5;

HRMS (ESI)  $m/z$  calculated for  $[\text{C}_{21}\text{H}_{27}\text{NO}_5+\text{H}]^+$   $[\text{M}+\text{H}]^+$  374.1962, found: 374.1970.

**3-Ethyl 4-pentyl 5-(hydroxymethyl)-1,2-diphenyl-1H-pyrrole-3,4-dicarboxylate (4at)**

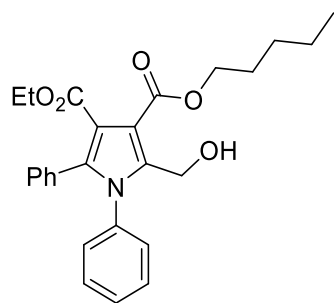

62.9 mg, 72% yield, Colorless oil,  $R_f = 0.41$  (PE/EtOAc = 3:1);

$^1\text{H NMR}$  (500 MHz,  $\text{CDCl}_3$ )  $\delta$  7.31-7.29 (m, 3H), 7.18-7.09 (m, 7H), 4.48 (d,  $J = 6.9$  Hz, 2H), 4.28 (t,  $J = 6.8$  Hz, 2H), 4.15 (q,  $J = 7.2$  Hz, 2H), 3.79 (t,  $J = 7.1$  Hz, 1H), 1.75-1.69 (m, 2H), 1.42-1.31 (m, 4H), 1.13 (t,  $J = 7.2$  Hz, 3H), 0.91 (t,  $J = 7.2$  Hz, 3H);

$^{13}\text{C NMR}$  (125 MHz,  $\text{CDCl}_3$ )  $\delta$  165.8, 165.7, 139.9, 136.1, 134.9, 130.5, 130.0, 129.2, 128.7, 128.5, 128.2, 127.9, 116.5, 113.3, 65.2, 61.0, 55.3, 28.5, 28.2, 22.5, 14.1;

HRMS (ESI)  $m/z$  calculated for  $[\text{C}_{26}\text{H}_{29}\text{NO}_5 + \text{H}]^+$   $[\text{M} + \text{H}]^+$  436.2118, found: 436.2122.

**3-Benzyl 4-ethyl 2-(hydroxymethyl)-1,5-diphenyl-1H-pyrrole-3,4-dicarboxylate (4au)**

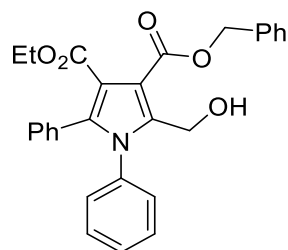

48.7 mg, 54% yield, Colorless oil,  $R_f = 0.30$  (PE/EtOAc = 3:1);

$^1\text{H NMR}$  (500 MHz,  $\text{CDCl}_3$ )  $\delta$  7.43 (d,  $J = 7.1$  Hz, 2H), 7.38-7.35 (m, 2H), 7.33-7.30 (m, 4H), 7.18-7.09 (m, 7H), 5.33 (s, 2H), 4.50 (d,  $J = 6.9$  Hz, 2H), 3.92 (q,  $J = 7.2$  Hz, 2H), 3.71 (t,  $J = 7.1$  Hz, 1H), 0.98 (t,  $J = 7.2$  Hz, 3H);

$^{13}\text{C NMR}$  (125 MHz,  $\text{CDCl}_3$ )  $\delta$  165.8, 165.3, 140.2, 136.1, 135.8, 134.8, 130.5, 129.9, 129.3, 128.9, 128.7, 128.5, 12.41, 128.39, 128.2, 127.9, 116.7, 112.9, 66.9, 61.1, 55.2, 14.0;

HRMS (ESI)  $m/z$  calculated for  $[\text{C}_{28}\text{H}_{25}\text{NO}_5 + \text{H}]^+$   $[\text{M} + \text{H}]^+$  456.1805, found: 456.1816.

**3-Allyl 4-ethyl 2-(hydroxymethyl)-1,5-diphenyl-1H-pyrrole-3,4-dicarboxylate (4av)**

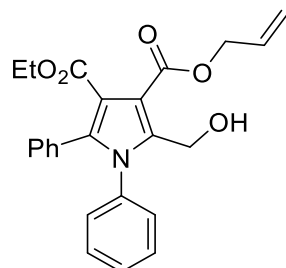

58.1 mg, 72% yield, white solid, m.p. 143-145 °C,  $R_f = 0.36$  (PE/EtOAc = 3:1);

$^1\text{H NMR}$  (500 MHz,  $\text{CDCl}_3$ )  $\delta$  7.33-7.31 (m, 3H), 7.21-7.17 (m, 3H), 7.16-7.10 (m, 4H), 6.05-5.97 (m, 1H), 5.42 (dq,  $J = 17.2$  Hz, 1.5 Hz, 1H), 5.28 (dq,  $J = 10.5$  Hz, 1.2 Hz, 1H), 4.81 (dt,  $J = 5.7$  Hz, 1.4 Hz, 2H), 4.50 (s, 2H), 4.16 (q,  $J = 7.2$  Hz, 2H), 3.70 (s, 1H), 1.15 (t,  $J = 7.2$  Hz, 3H);

$^{13}\text{C NMR}$  (125 MHz,  $\text{CDCl}_3$ )  $\delta$  165.8, 165.2, 140.0, 136.1, 135.1, 132.1, 130.6, 129.9, 129.3, 128.9, 128.5, 128.3, 127.9, 118.6, 116.5, 113.1, 65.7, 61.1, 55.2, 14.1;

HRMS (ESI)  $m/z$  calculated for  $[\text{C}_{24}\text{H}_{23}\text{NO}_5 + \text{H}]^+$   $[\text{M} + \text{H}]^+$  406.1649, found: 406.1656.

**3-(But-3-yn-1-yl) 4-ethyl 2-(hydroxymethyl)-1,5-diphenyl-1H-pyrrole-3,4-dicarboxylate (4aw)**

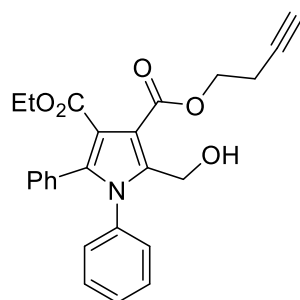

66.0 mg, 79% yield, Colorless oil,  $R_f = 0.29$  (PE/EtOAc = 3:1);

$^1\text{H NMR}$  (500 MHz,  $\text{CDCl}_3$ )  $\delta$  7.32-7.28 (m, 3H), 7.19-7.14 (m, 3H), 7.14-7.10 (m, 4H), 4.49 (s, 2H), 4.40 (t,  $J = 6.8$  Hz, 2H), 4.17 (q,  $J = 7.1$  Hz, 2H), 3.92-2.76 (m, 1H), 2.63 (td,  $J = 6.7, 2.7$  Hz, 2H), 2.04-2.02 (m, 1H), 1.13 (t,  $J = 7.1$  Hz, 3H);

$^{13}\text{C NMR}$  (125 MHz,  $\text{CDCl}_3$ )  $\delta$  165.6, 164.8, 139.7, 136.1, 135.3, 130.6, 130.0, 129.2, 128.9, 128.53, 128.3, 127.9, 116.6, 112.9, 80.3, 70.3, 62.6, 61.1, 55.1, 19.1, 14.1;

HRMS (ESI)  $m/z$  calculated for  $[\text{C}_{25}\text{H}_{23}\text{NO}_5 + \text{H}]^+$   $[\text{M} + \text{H}]^+$  418.1649, found: 418.1651.

**3-(2-Cyanoethyl) 4-ethyl 2-(hydroxymethyl)-1,5-diphenyl-1H-pyrrole-3,4-dicarboxylate (4ax)**

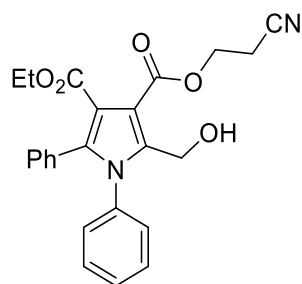

62.6 mg, 75% yield, white solid, m.p. 187-188 °C,  $R_f$  = 0.66 (PE/EtOAc = 3:1);

$^1\text{H}$  NMR (500 MHz,  $\text{CDCl}_3$ )  $\delta$  7.34-7.29 (m, 3H), 7.22-7.16 (m, 2H), 7.16-7.15 (m, 1H), 7.14-7.09 (m, 4H), 4.51-4.49 (m, 4H), 4.17 (q,  $J$  = 7.1 Hz, 2H), 3.46 (s, 1H), 2.81 (t,  $J$  = 6.3 Hz, 2H), 1.08 (t,  $J$  = 7.1 Hz, 3H).;

$^{13}\text{C}$  NMR (125 MHz,  $\text{CDCl}_3$ )  $\delta$  165.4, 164.7, 140.3, 135.9, 135.9, 130.6, 129.9, 129.3, 129.0, 128.5, 128.4, 127.8, 117.1, 116.4, 112.3, 61.2, 59.2, 55.0, 18.1, 14.0;

HRMS (ESI)  $m/z$  calculated for  $[\text{C}_{24}\text{H}_{22}\text{N}_2\text{O}_5+\text{H}]^+$   $[\text{M}+\text{H}]^+$  419.1601, found: 419.1610.

**3-Ethyl 4-methyl 5-(1-hydroxyethyl)-1,2-diphenyl-1H-pyrrole-3,4-dicarboxylate (4ay)**

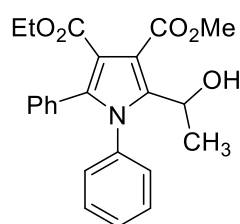

12.6 mg, 16% yield, Colorless oil,  $R_f$  = 0.33 (PE/EtOAc = 3:1);

$^1\text{H}$  NMR (500 MHz,  $\text{CDCl}_3$ )  $\delta$  7.33-7.28 (m, 3H), 7.18-7.12 (m, 4H), 7.10-7.08 (m, 2H), 6.99-6.97 (m, 1H), 5.50 (d,  $J$  = 8.1 Hz, 1H), 4.53 (t,  $J$  = 6.4 Hz, 1H), 4.19-4.14 (m, 2H), 3.88 (s, 3H), 1.44 (d,  $J$  = 6.8 Hz, 3H), 1.14 (t,  $J$  = 7.2 Hz, 3H);

$^{13}\text{C}$  NMR (125 MHz,  $\text{CDCl}_3$ )  $\delta$  167.1, 166.1, 145.0, 136.3, 134.3, 130.5, 129.9, 129.5, 129.20, 129.19, 128.9, 128.4, 128.2, 127.9, 117.1, 110.2, 63.5, 61.1, 52.3, 23.5, 14.2;

HRMS (ESI)  $m/z$  calculated for  $[\text{C}_{23}\text{H}_{23}\text{NO}_5+\text{H}]^+$   $[\text{M}+\text{H}]^+$  394.1649, found: 394.1652.

**Diethyl 2-(1-hydroxypropyl)-1,5-diphenyl-1H-pyrrole-3,4-dicarboxylate (4az)**

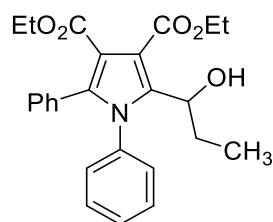

16.9 mg, 20% yield, Colorless oil,  $R_f = 0.51$  (PE/EtOAc = 3:1);

$^1\text{H NMR}$  (500 MHz,  $\text{CDCl}_3$ )  $\delta$  7.36-7.29 (m, 2H), 7.27-7.24 (m, 1H), 7.23-7.21 (m, 1H), 7.16-7.08 (m, 5H), 6.93-6.91 (m, 1H), 5.33 (d,  $J = 11.2$  Hz, 1H), 4.38 (q,  $J = 7.2$  Hz, 2H), 4.26-4.21 (m, 1H), 4.18-4.11 (m, 2H), 1.91-1.82 (m, 1H), 1.69-1.61 (m, 1H), 1.34 (t,  $J = 7.2$  Hz, 3H), 1.14 (t,  $J = 7.2$  Hz, 3H), 0.78 (t,  $J = 7.4$  Hz, 3H);

$^{13}\text{C NMR}$  (125 MHz,  $\text{CDCl}_3$ )  $\delta$  166.7, 166.2, 144.2, 136.5, 134.2, 130.5, 130.0, 129.4, 129.1, 129.0, 128.7, 128.1, 127.8, 117.3, 110.7, 68.9, 61.3, 61.0, 30.4, 14.2, 14.1, 10.9;

HRMS (ESI)  $m/z$  calculated for  $[\text{C}_{25}\text{H}_{27}\text{NO}_5 + \text{H}]^+$   $[\text{M} + \text{H}]^+$  422.1962, found: 422.1972.

**Diethyl 2-(ethoxymethyl)-1,5-diphenyl-1H-pyrrole-3,4-dicarboxylate (5aa)**

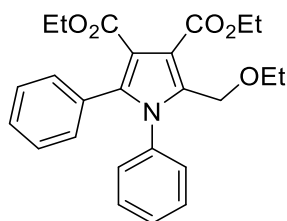

63.2 mg, 75% yield, light yellow oil,  $R_f = 0.14$  (PE/EtOAc = 10:1);

$^1\text{H NMR}$  (500 MHz,  $\text{CDCl}_3$ )  $\delta$  7.28-7.25 (m, 3H), 7.16-7.12 (m, 7H), 4.44 (s, 2H), 4.33 (q,  $J = 7.2$  Hz, 2H), 4.14 (q,  $J = 7.1$  Hz, 2H), 3.39 (q,  $J = 7.0$  Hz, 2H), 1.34 (t,  $J = 7.2$  Hz, 3H), 1.12 (t,  $J = 7.2$  Hz, 3H), 1.09 (t,  $J = 7.0$  Hz, 3H);

$^{13}\text{C NMR}$  (125 MHz,  $\text{CDCl}_3$ )  $\delta$  165.5, 164.7, 136.7, 136.5, 134.4, 130.6, 130.3, 128.7, 128.6, 128.1, 127.7, 65.5, 61.2, 60.7, 60.6, 15.2, 14.3, 14.0;

HRMS (ESI)  $m/z$  calculated for  $[\text{C}_{25}\text{H}_{27}\text{NO}_5 + \text{H}]^+$   $[\text{M} + \text{H}]^+$  422.1962, found: 422.1972.

**Diethyl 2-(ethoxymethyl)-5-(4-fluorophenyl)-1-phenyl-1H-pyrrole-3,4-dicarboxylate (5ba)**

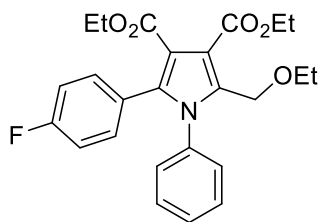

74.5 mg, 85% yield, light yellow oil,  $R_f = 0.16$  (PE/EtOAc = 10:1);

$^1\text{H NMR}$  (500 MHz,  $\text{CDCl}_3$ )  $\delta$  7.29-7.27 (m, 3H), 7.14-7.10 (m, 4H), 6.85-6.82 (m, 2H), 4.42 (s, 2H), 4.33 (q,  $J = 7.2$  Hz, 2H), 4.14 (q,  $J = 7.2$  Hz, 2H), 3.37 (q,  $J = 7.0$  Hz, 2H), 1.34 (t,  $J = 7.2$  Hz, 3H), 1.14 (t,  $J = 7.2$  Hz, 3H), 1.08 (t,  $J = 7.0$  Hz, 3H);

$^{13}\text{C NMR}$  (125 MHz,  $\text{CDCl}_3$ )  $\delta$  165.3, 164.7, 162.4 (d,  $J = 246.9$  Hz), 136.5, 135.6, 134.4, 132.6 (d,  $J = 8.2$  Hz), 128.9, 128.74, 128.71, 126.4 (d,  $J = 3.5$  Hz), 115.8, 115.6, 114.9 (d,  $J = 21.5$  Hz), 65.6, 61.2, 60.72, 60.68, 15.1, 14.3, 14.1;

HRMS (ESI)  $m/z$  calculated for  $[\text{C}_{25}\text{H}_{26}\text{FNO}_5 + \text{H}]^+$   $[\text{M} + \text{H}]^+$  440.1868, found: 440.1875.

**Diethyl 2-(4-bromophenyl)-5-(ethoxymethyl)-1-phenyl-1H-pyrrole-3,4-dicarboxylate (5ca)**

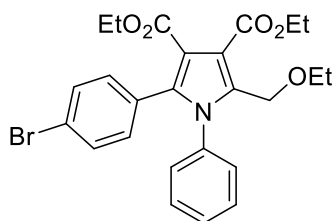

85.7 mg, 86% yield, light yellow oil, m.p. 131-132 °C,  $R_f = 0.14$  (PE/EtOAc = 10:1);

$^1\text{H NMR}$  (500 MHz,  $\text{CDCl}_3$ )  $\delta$  7.30-7.26 (m, 5H), 7.15-7.13 (m, 2H), 7.00 (d,  $J = 8.5$  Hz, 2H), 4.42 (s, 2H), 4.32 (q,  $J = 7.2$  Hz, 2H), 4.15 (q,  $J = 7.2$  Hz, 2H), 3.37 (q,  $J = 7.0$  Hz, 2H), 1.34 (t,  $J = 7.2$  Hz, 3H), 1.15 (t,  $J = 7.2$  Hz, 3H), 1.08 (t,  $J = 7.0$  Hz, 3H);

$^{13}\text{C NMR}$  (125 MHz,  $\text{CDCl}_3$ )  $\delta$  165.3, 164.5, 136.4, 135.2, 134.7, 132.2, 131.0, 129.3, 129.0, 128.8, 128.7, 122.6, 116.1, 115.7, 65.6, 61.2, 60.8, 60.7, 15.2, 14.3, 14.1;

HRMS (ESI)  $m/z$  calculated for  $[\text{C}_{25}\text{H}_{26}\text{BrNO}_5 + \text{H}]^+$   $[\text{M} + \text{H}]^+$  500.1067, found: 500.1075.

**Diethyl 2-(ethoxymethyl)-1-phenyl-5-(*p*-tolyl)-1*H*-pyrrole-3,4-dicarboxylate (5da)**

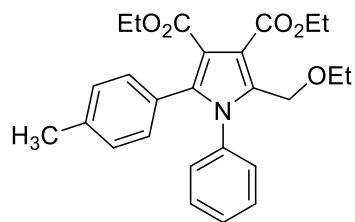

69.1 mg, 79% yield, light yellow oil,  $R_f = 0.16$  (PE/EtOAc = 10:1);

$^1\text{H NMR}$  (500 MHz,  $\text{CDCl}_3$ )  $\delta$  7.28-7.26 (m, 3H), 7.16-7.15 (m, 2H), 7.01 (d,  $J = 8.2$  Hz, 2H), 6.94 (d,  $J = 7.9$  Hz, 2H), 4.44 (s, 2H), 4.32 (q,  $J = 7.2$  Hz, 2H), 4.14 (q,  $J = 7.2$  Hz, 2H), 3.38 (q,  $J = 7.0$  Hz, 2H), 2.22 (s, 3H), 1.34 (t,  $J = 7.2$  Hz, 3H), 1.15 (t,  $J = 7.2$  Hz, 3H), 1.09 (t,  $J = 7.0$  Hz, 3H);

$^{13}\text{C NMR}$  (125 MHz,  $\text{CDCl}_3$ )  $\delta$  165.7, 164.7, 137.9, 136.8, 136.7, 134.3, 130.5, 128.8, 128.7, 128.53, 128.48, 127.3, 115.7, 115.4, 65.5, 61.2, 60.7, 60.6, 21.3, 15.2, 14.4, 14.1;

HRMS (ESI)  $m/z$  calculated for  $[\text{C}_{26}\text{H}_{29}\text{NO}_5+\text{H}]^+$   $[\text{M}+\text{H}]^+$  436.2118, found: 436.2125.

**Diethyl 2-(2-bromophenyl)-5-(ethoxymethyl)-1-phenyl-1*H*-pyrrole-3,4-dicarboxylate (5ea)**

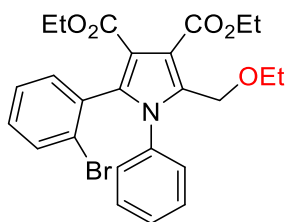

90.2 mg, 90% yield, light yellow oil,  $R_f = 0.11$  (PE/EtOAc = 10:1);

$^1\text{H NMR}$  (500 MHz,  $\text{CDCl}_3$ )  $\delta$  7.36 (dd,  $J = 7.9$  Hz, 0.9 Hz, 1H), 7.20-7.18 (m, 5H), 7.10-7.04 (m, 2H), 7.01-6.98 (m, 1H), 4.42 (d,  $J = 11.9$  Hz, 1H), 4.31-4.26 (m, 3H), 4.05-3.95 (m, 2H), 3.33-3.26 (m, 2H), 1.30 (t,  $J = 7.2$  Hz, 3H), 1.01 (t,  $J = 7.0$  Hz, 3H), 0.94 (t,  $J = 7.2$  Hz, 3H);

$^{13}\text{C NMR}$  (125 MHz,  $\text{CDCl}_3$ )  $\delta$  165.1, 163.9, 136.9, 136.2, 133.7, 133.1, 132.7, 132.2, 130.1, 128.8, 128.6, 128.4, 126.6, 125.7, 116.3, 115.3, 65.4, 61.3, 60.8, 60.2, 15.1, 14.3, 13.9;

HRMS (ESI)  $m/z$  calculated for  $[\text{C}_{25}\text{H}_{26}\text{BrNO}_5+\text{H}]^+$   $[\text{M}+\text{H}]^+$  500.1067, found: 500.1075.

**Diethyl 2-(3-bromophenyl)-5-(ethoxymethyl)-1-phenyl-1*H*-pyrrole-3,4-dicarboxylate (5fa)**

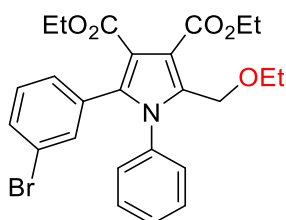



85.3 mg, 85% yield, light yellow oil,  $R_f = 0.14$  (PE/EtOAc = 10:1);

$^1\text{H NMR}$  (500 MHz,  $\text{CDCl}_3$ )  $\delta$  7.34-7.31 (m, 1H), 7.31-7.27 (m, 4H), 7.16-7.14 (m, 2H), 7.01-6.97 (m, 2H), 4.43 (s, 2H), 4.32 (q,  $J = 7.2$  Hz, 2H), 4.16 (q,  $J = 7.2$  Hz, 2H), 3.37 (q,  $J = 7.0$  Hz, 2H), 1.34 (t,  $J = 7.2$  Hz, 3H), 1.16 (t,  $J = 7.2$  Hz, 3H), 1.08 (t,  $J = 7.0$  Hz, 3H);

$^{13}\text{C NMR}$  (125 MHz,  $\text{CDCl}_3$ )  $\delta$  165.2, 164.5, 136.3, 134.8, 134.6, 133.6, 132.3, 131.1, 129.22, 129.19, 129.0, 128.9, 128.7, 121.7, 116.4, 115.6, 65.6, 61.1, 60.9, 60.7, 15.2, 14.3, 14.1;

HRMS (ESI)  $m/z$  calculated for  $[\text{C}_{25}\text{H}_{26}\text{BrNO}_5 + \text{H}]^+$   $[\text{M} + \text{H}]^+$  500.1067, found: 500.1076.

#### Diethyl 2-(ethoxymethyl)-5-(naphthalen-2-yl)-1-phenyl-1H-pyrrole-3,4-dicarboxylate (5ga)

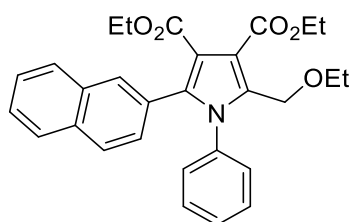

66.8 mg, 71% yield, light yellow oil,  $R_f = 0.14$  (PE/EtOAc = 10:1);

$^1\text{H NMR}$  (500 MHz,  $\text{CDCl}_3$ )  $\delta$  7.74 (s, 1H), 7.71-7.67 (m, 2H), 7.58 (d,  $J = 8.5$  Hz, 1H), 7.41-7.40 (m, 2H), 7.25-7.20 (m, 4H), 7.16 (dd,  $J = 8.5$  Hz, 1.6 Hz, 1H), 4.50 (s, 2H), 4.36 (q,  $J = 7.2$  Hz, 2H), 4.14 (q,  $J = 7.2$  Hz, 2H), 3.43 (q,  $J = 7.0$  Hz, 2H), 1.37 (t,  $J = 7.2$  Hz, 3H), 1.13 (t,  $J = 7.0$  Hz, 3H), 1.10 (t,  $J = 7.2$  Hz, 3H);

$^{13}\text{C NMR}$  (125 MHz,  $\text{CDCl}_3$ )  $\delta$  165.7, 164.6, 136.7, 136.2, 134.7, 132.73, 132.67, 130.4, 128.9, 128.74, 128.65, 128.2, 127.79, 127.77, 127.6, 127.2, 126.5, 126.2, 116.4, 115.5, 65.6, 61.2, 60.8, 60.6, 15.2, 14.4, 14.1;

HRMS (ESI)  $m/z$  calculated for  $[\text{C}_{29}\text{H}_{29}\text{NO}_5 + \text{H}]^+$   $[\text{M} + \text{H}]^+$  472.2118, found: 472.2125.

#### Diethyl 2-(ethoxymethyl)-5-methyl-1-phenyl-1H-pyrrole-3,4-dicarboxylate (5ha)

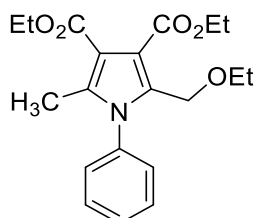

45.3 mg, 63% yield, colorless oil,  $R_f = 0.12$  (PE/EtOAc = 10:1);

$^1\text{H NMR}$  (500 MHz,  $\text{CDCl}_3$ )  $\delta$  7.47-7.44 (m, 3H), 7.25-7.22 (m, 2H), 4.32-4.24 (m, 6H), 3.27 (q,  $J = 7.0$  Hz, 2H), 2.16 (s, 3H), 1.32 (t,  $J = 7.1$  Hz, 3H), 1.30 (t,  $J = 7.2$  Hz, 3H), 1.02 (t,  $J = 7.0$  Hz,

3H);

$^{13}\text{C}$  NMR (125 MHz,  $\text{CDCl}_3$ )  $\delta$  165.5, 165.2, 136.4, 136.3, 132.5, 129.3, 129.2, 128.4, 116.4, 112.4, 65.1, 61.2, 60.7, 60.2, 15.1, 14.4, 14.3, 12.0;

HRMS (ESI)  $m/z$  calculated for  $[\text{C}_{20}\text{H}_{25}\text{NO}_5+\text{H}]^+$   $[\text{M}+\text{H}]^+$  360.1805, found: 360.1812.

**Diethyl 2-(ethoxymethyl)-1-phenyl-5-propyl-1H-pyrrole-3,4-dicarboxylate (5ia)**

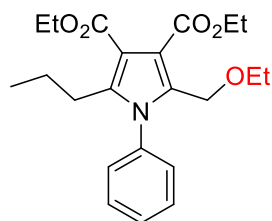

36.4 mg, 47% yield, colorless oil,  $R_f$  = 0.18 (PE/EtOAc = 10:1);

$^1\text{H}$  NMR (500 MHz,  $\text{CDCl}_3$ )  $\delta$  7.47-7.46 (m, 3H), 7.26-7.24 (m, 2H), 4.31 (q,  $J$  = 7.2 Hz, 2H), 4.27 (q,  $J$  = 7.2 Hz, 2H), 4.25 (s, 2H), 3.25 (q,  $J$  = 7.0 Hz, 2H), 2.56-2.53 (m, 2H), 1.35-1.29 (m, 8H), 1.02 (t,  $J$  = 7.0 Hz, 3H), 0.72 (t,  $J$  = 7.4 Hz, 3H);

$^{13}\text{C}$  NMR (125 MHz,  $\text{CDCl}_3$ )  $\delta$  165.6, 165.2, 140.6, 136.3, 132.4, 129.3, 129.1, 128.8, 116.4, 112.3, 65.2, 61.2, 60.7, 60.2, 27.4, 23.2, 15.1, 14.36, 14.35, 14.0;

HRMS (ESI)  $m/z$  calculated for  $[\text{C}_{22}\text{H}_{29}\text{NO}_5+\text{Na}]^+$   $[\text{M}+\text{Na}]^+$  410.1943, found: 410.1943.

**Diethyl 2-(methoxymethyl)-1,5-diphenyl-1H-pyrrole-3,4-dicarboxylate (5ab)**

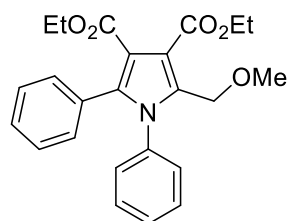

54.2 mg, 67% yield, light yellow oil,  $R_f$  = 0.11 (PE/EtOAc = 10:1);

$^1\text{H}$  NMR (500 MHz,  $\text{CDCl}_3$ )  $\delta$  7.29-7.26 (m, 3H), 7.17-7.12 (m, 7H), 4.40 (s, 2H), 4.34 (q,  $J$  = 7.1 Hz, 2H), 4.15 (q,  $J$  = 7.1 Hz, 2H), 3.25 (s, 3H), 1.35 (t,  $J$  = 7.1 Hz, 3H), 1.13 (t,  $J$  = 7.1 Hz, 3H);

$^{13}\text{C}$  NMR (125 MHz,  $\text{CDCl}_3$ )  $\delta$  165.5, 164.7, 136.6, 136.5, 134.1, 130.6, 130.3, 128.8, 128.70, 128.65, 128.1, 127.8, 115.9, 115.6, 63.0, 60.8, 60.7, 57.8, 14.4, 14.1;

HRMS (ESI)  $m/z$  calculated for  $[\text{C}_{24}\text{H}_{25}\text{NO}_5+\text{H}]^+$   $[\text{M}+\text{H}]^+$  408.1805, found: 408.1814.

**Diethyl 2-(butoxymethyl)-1,5-diphenyl-1H-pyrrole-3,4-dicarboxylate (5ac)**

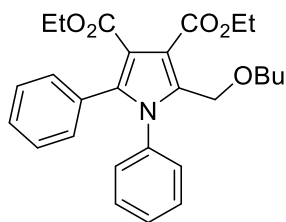

51.5 mg, 57% yield, light yellow oil,  $R_f = 0.11$  (PE/EtOAc = 10:1);

$^1\text{H NMR}$  (500 MHz,  $\text{CDCl}_3$ )  $\delta$  7.28-7.25 (m, 3H), 7.17-7.12 (m, 7H), 4.43 (s, 2H), 4.33 (q,  $J = 7.1$  Hz, 2H), 4.14 (q,  $J = 7.1$  Hz, 2H), 3.33 (t,  $J = 6.5$  Hz, 2H), 1.49-1.43 (m, 2H), 1.35 (t,  $J = 7.1$  Hz, 3H), 1.30-1.24 (m, 2H), 1.12 (t,  $J = 7.1$  Hz, 3H), 0.85 (t,  $J = 7.4$  Hz, 3H);

$^{13}\text{C NMR}$  (125 MHz,  $\text{CDCl}_3$ )  $\delta$  165.5, 164.7, 136.7, 136.5, 134.4, 130.6, 130.3, 128.8, 128.7, 128.6, 128.1, 127.7, 115.9, 115.5, 70.1, 61.5, 60.7, 60.6, 31.8, 19.4, 14.4, 14.05, 13.98;

HRMS (ESI)  $m/z$  calculated for  $[\text{C}_{27}\text{H}_{31}\text{NO}_5 + \text{H}]^+$   $[\text{M} + \text{H}]^+$  450.2275, found: 450.2289.

**Diethyl 1,2-diphenyl-5-((phenylamino)methyl)-1H-pyrrole-3,4-dicarboxylate (6aa)**

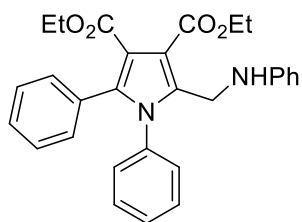

50.9 mg, 54% yield, light yellow oil,  $R_f = 0.60$  (PE/EtOAc = 3:1);

$^1\text{H NMR}$  (500 MHz,  $\text{CDCl}_3$ )  $\delta$  7.32-7.27 (m, 3H), 7.18-7.06 (m, 9H), 6.70-6.66 (m, 1H), 6.44-6.42 (m, 2H), 4.33 (q,  $J = 7.1$  Hz, 2H), 4.29 (s, 2H), 4.23 (brs, 1H), 4.18 (q,  $J = 7.1$  Hz, 2H), 1.31 (t,  $J = 7.2$  Hz, 3H), 1.16 (t,  $J = 7.1$  Hz, 3H);

$^{13}\text{C NMR}$  (125 MHz,  $\text{CDCl}_3$ )  $\delta$  165.7, 164.8, 147.7, 136.6, 136.5, 135.5, 130.7, 130.2, 129.23, 129.18, 128.9, 128.5, 128.1, 127.8, 118.1, 116.4, 114.2, 113.8, 60.9, 60.7, 39.2, 14.3, 14.1;

HRMS (ESI)  $m/z$  calculated for  $[\text{C}_{29}\text{H}_{28}\text{N}_2\text{O}_4 + \text{Na}]^+$   $[\text{M} + \text{Na}]^+$  491.1947, found: 491.1956.

**Ethyl 4-benzoyl-1,2-diphenyl-5-((phenylamino)methyl)-1H-pyrrole-3-carboxylate (6ab)**

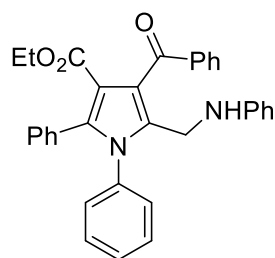

49.2 mg, 49% yield, light yellow solid, m.p. 178-180 °C,  $R_f$  = 0.66 (PE/EtOAc = 3:1);

$^1\text{H}$  NMR (500 MHz,  $\text{CDCl}_3$ )  $\delta$  7.93-7.91 (m, 2H), 7.54-7.51 (m, 1H), 7.45-7.42 (m, 2H), 7.31-7.30 (m, 3H), 7.25-7.23 (m, 1H), 7.20-7.18 (m, 6H), 7.01-6.98 (m, 2H), 6.64 (t,  $J$  = 7.3 Hz, 1H), 6.35 (d,  $J$  = 7.8 Hz, 2H), 4.15 (s, 2H), 3.61 (q,  $J$  = 7.2 Hz, 2H), 0.67 (t,  $J$  = 7.2 Hz, 3H);

$^{13}\text{C}$  NMR (125 MHz,  $\text{CDCl}_3$ )  $\delta$  193.8, 163.9, 147.4, 139.5, 136.6, 135.2, 132.6, 131.5, 130.2, 129.5, 129.3, 129.1, 128.84, 128.80, 128.41, 128.40, 127.6, 127.5, 126.2, 123.7, 118.1, 113.9, 60.2, 39.1, 13.4;

HRMS (ESI)  $m/z$  calculated for  $[\text{C}_{29}\text{H}_{28}\text{N}_2\text{O}_4+\text{Na}]^+$   $[\text{M}+\text{Na}]^+$  523.1992, found: 523.1988.

#### Diethyl 2-(azidomethyl)-1,5-diphenyl-1H-pyrrole-3,4-dicarboxylate (7aa)

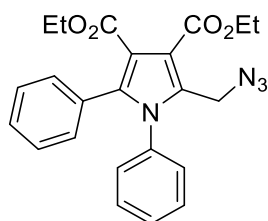

10.6 mg, 13% yield, colorless oil,  $R_f$  = 0.63 (PE/EtOAc = 3:1);

$^1\text{H}$  NMR (500 MHz,  $\text{CDCl}_3$ )  $\delta$  7.34-7.31 (m, 3H), 7.19-7.11 (m, 7H), 4.41 (brs, 2H), 4.36 (q,  $J$  = 7.2 Hz, 2H), 4.18 (q,  $J$  = 7.2 Hz, 2H), 1.36 (t,  $J$  = 7.2 Hz, 3H), 1.15 (t,  $J$  = 7.2 Hz, 3H);

$^{13}\text{C}$  NMR (125 MHz,  $\text{CDCl}_3$ )  $\delta$  165.6, 164.0, 136.4, 136.0, 132.4, 130.5, 129.9, 129.3, 129.2, 128.6, 128.3, 127.9, 116.7, 114.9, 61.0, 60.8, 44.0, 14.3, 14.1.;

HRMS (ESI)  $m/z$  calculated for  $[\text{C}_{23}\text{H}_{22}\text{N}_4\text{O}_4+\text{H}]^+$   $[\text{M}+\text{H}]^+$  419.1714, found: 419.1714.

#### Diethyl 2-((1H-indol-3-yl)methyl)-1,5-diphenyl-1H-pyrrole-3,4-dicarboxylate (8aa)

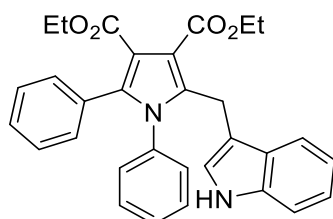

52.2 mg, 53% yield, light yellow solid, m.p. 177-179 °C,  $R_f$  = 0.82 (PE/EtOAc = 1:1);

$^1\text{H}$  NMR (500 MHz,  $\text{CDCl}_3$ )  $\delta$  7.92 (brs, 1H), 7.26-7.17 (m, 3H), 7.13-7.09 (m, 8H), 6.98-6.95 (m, 1H), 6.85 (d,  $J$  = 7.6 Hz, 2H), 6.55 (d,  $J$  = 2.0 Hz, 1H), 4.29 (q,  $J$  = 7.1 Hz, 2H), 4.24 (s, 2H), 4.18 (q,  $J$  = 7.1 Hz, 2H), 1.25 (t,  $J$  = 7.1 Hz, 3H), 1.15 (t,  $J$  = 7.1 Hz, 3H);

$^{13}\text{C}$  NMR (125 MHz,  $\text{CDCl}_3$ )  $\delta$  166.0, 165.2, 138.2, 136.9, 136.0, 135.5, 130.6, 130.5, 128.8, 128.8, 128.4, 127.8, 127.6, 126.9, 122.7, 121.8, 119.2, 118.9, 115.9, 113.3, 113.0, 110.9, 60.8, 60.4, 21.7, 14.3, 14.1;

HRMS (ESI)  $m/z$  calculated for  $[\text{C}_{31}\text{H}_{28}\text{N}_2\text{O}_4+\text{H}]^+$   $[\text{M}+\text{H}]^+$  493.2122, found: 493.2118.

#### Diethyl 2-((5-nitro-1H-indol-3-yl)methyl)-1,5-diphenyl-1H-pyrrole-3,4-dicarboxylate (8ab)

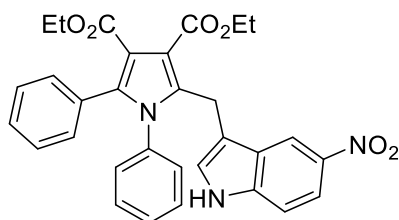

77.5 mg, 72% yield, yellow solid, m.p. 230-231 °C,  $R_f$  = 0.58 (PE/EtOAc = 1:1);

$^1\text{H}$  NMR (500 MHz,  $\text{CDCl}_3$ )  $\delta$  9.09 (s), 7.98 (d,  $J$  = 2.1 Hz, 1H), 7.94 (d,  $J$  = 8.9 Hz, 2.2 Hz, 1H), 7.24 (d,  $J$  = 8.9 Hz, 1H), 7.21-7.17 (m, 1H), 7.14-7.05 (m, 7H), 6.86-6.84 (m, 2H), 4.31 (q,  $J$  = 7.1 Hz, 2H), 4.27 (s, 2H), 4.18 (q,  $J$  = 7.1 Hz, 2H), 1.27 (t,  $J$  = 7.1 Hz, 3H), 1.14 (t,  $J$  = 7.1 Hz, 3H);

$^{13}\text{C}$  NMR (125 MHz,  $\text{CDCl}_3$ )  $\delta$  166.3, 165.1, 141.3, 138.9, 138.1, 136.4, 135.6, 130.5, 130.2, 129.1, 128.9, 128.7, 128.1, 127.8, 126.21, 126.17, 117.3, 116.1, 116.0, 115.6, 112.6, 111.1, 61.0, 60.7, 21.2, 14.3, 14.1;

HRMS (ESI)  $m/z$  calculated for  $[\text{C}_{31}\text{H}_{27}\text{N}_3\text{O}_6+\text{H}]^+$   $[\text{M}+\text{H}]^+$  538.1973, found: 538.1979.

#### Diethyl 2-((5-methylfuran-2-yl)methyl)-1,5-diphenyl-1H-pyrrole-3,4-dicarboxylate (9aa)

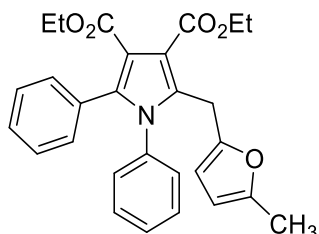

26.1 mg, 29% yield, colorless oil,  $R_f$  = 0.64 (PE/EtOAc = 3:1);

$^1\text{H}$  NMR (500 MHz,  $\text{CDCl}_3$ )  $\delta$  7.27-7.23 (m, 3H), 7.14-7.11 (m, 5H), 7.01-7.00 (m, 2H), 5.73-5.72 (m, 1H), 5.63 (d,  $J$  = 2.8 Hz, 1H), 4.29 (q,  $J$  = 7.7 Hz, 2H), 4.16 (q,  $J$  = 7.2 Hz, 2H), 4.06 (s, 2H),

2.14 (s, 3H), 1.31 (t,  $J = 7.2$  Hz, 3H), 1.14 (t,  $J = 7.2$  Hz, 3H);

$^{13}\text{C}$  NMR (125 MHz,  $\text{CDCl}_3$ )  $\delta$  166.0, 164.6, 150.6, 149.8, 136.7, 135.5, 135.4, 130.5, 130.4, 129.0, 128.9, 128.7, 127.9, 127.7, 116.1, 113.2, 107.0, 106.1, 60.8, 60.4, 24.9, 14.3, 14.1, 13.6;

HRMS (ESI)  $m/z$  calculated for  $[\text{C}_{28}\text{H}_{27}\text{NO}_5+\text{H}]^+$   $[\text{M}+\text{H}]^+$  458.1962, found: 458.1970.

#### Diethyl 1,2-diphenyl-5-(phenylsulfonamidomethyl)-1H-pyrrole-3,4-dicarboxylate (10aa)

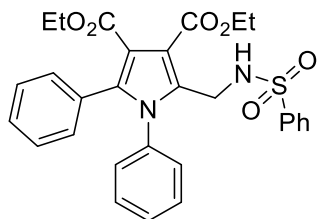

36.9 mg, 35% yield, white solid, m.p. 265-267 °C,  $R_f = 0.78$  (PE/EtOAc = 1:1);

$^1\text{H}$  NMR (500 MHz,  $\text{CDCl}_3$ )  $\delta$  7.73-7.71 (m, 2H), 7.55-7.52 (m, 1H), 7.46-7.43 (m, 2H), 7.32-7.26 (m, 3H), 7.17-7.12 (m, 3H), 7.07-7.05 (m, 2H), 7.01-6.99 (m, 2H), 5.96 (t,  $J = 6.7$  Hz, 1H), 4.26 (q,  $J = 7.2$  Hz, 2H), 4.14 (q,  $J = 7.2$  Hz, 2H), 4.05 (d,  $J = 6.7$  Hz, 2H), 1.28 (t,  $J = 7.2$  Hz, 3H), 1.14 (t,  $J = 7.2$  Hz, 3H);

$^{13}\text{C}$  NMR (125 MHz,  $\text{CDCl}_3$ )  $\delta$  165.6, 164.9, 139.8, 135.5, 135.3, 134.2, 132.7, 130.5, 129.8, 129.3, 129.15, 129.10, 128.6, 128.3, 127.9, 127.1, 116.7, 113.9, 61.04, 60.97, 38.4, 14.3, 14.1;

HRMS (ESI)  $m/z$  calculated for  $[\text{C}_{29}\text{H}_{28}\text{N}_2\text{O}_6\text{S}+\text{H}]^+$   $[\text{M}+\text{H}]^+$  533.1741, found: 533.1747.

#### Diethyl 1,2-diphenyl-5-(2,4,6-trimethoxybenzyl)-1H-pyrrole-3,4-dicarboxylate (11aa)

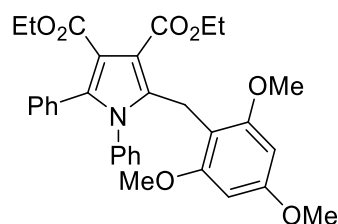

50.3 mg, 46% yield, colorless oil,  $R_f = 0.28$  (PE/EtOAc = 3:1);

$^1\text{H}$  NMR (500 MHz,  $\text{CDCl}_3$ )  $\delta$  7.18-7.08 (m, 8H), 6.85 (d,  $J = 7.0$  Hz, 2H), 5.89 (s, 2H), 4.17 (q,  $J = 7.2$  Hz, 2H), 4.08 (q,  $J = 7.2$  Hz, 2H), 4.01 (s, 2H), 3.73 (s, 3H), 3.51 (s, 6H);

$^{13}\text{C}$  NMR (125 MHz,  $\text{CDCl}_3$ )  $\delta$  166.2, 165.1, 160.0, 159.0, 137.2, 136.73, 136.67, 131.1, 129.3, 128.3, 128.0, 127.6, 127.3, 114.5, 113.9, 106.7, 100.0, 89.9, 60.4, 60.1, 55.6, 55.3, 19.6, 14.3, 14.0;

HRMS (ESI)  $m/z$  calculated for  $[\text{C}_{32}\text{H}_{33}\text{NO}_7+\text{H}]^+$   $[\text{M}+\text{H}]^+$  544.2330, found: 544.2335.

**Diethyl 2-(4-(dimethylamino)benzyl)-1,5-diphenyl-1H-pyrrole-3,4-dicarboxylate (12aa)**

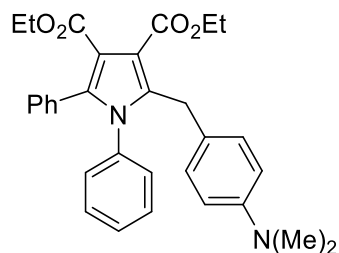

35.7 mg, 36% yield, colorless oil,  $R_f = 0.47$  (PE/EtOAc = 3:1);

$^1\text{H NMR}$  (500 MHz,  $\text{CDCl}_3$ )  $\delta$  7.25-7.10 (m, 8H), 6.83 (d,  $J = 7.1$  Hz, 2H), 6.69 (d,  $J = 8.7$  Hz, 2H), 6.52 (d,  $J = 8.6$  Hz, 2H), 4.30 (q,  $J = 7.1$  Hz, 2H), 4.17 (q,  $J = 7.2$  Hz, 2H), 4.04 (s, 2H), 2.85 (s, 6H), 1.30 (t,  $J = 7.1$  Hz, 3H), 1.15 (t,  $J = 7.1$  Hz, 3H);

$^{13}\text{C NMR}$  (125 MHz,  $\text{CDCl}_3$ )  $\delta$  166.1, 165.1, 149.2, 138.6, 136.9, 135.5, 130.6, 130.5, 129.10, 129.09, 128.8, 128.5, 127.8, 127.6, 115.8, 113.1, 112.8, 60.7, 60.4, 40.9, 30.4, 14.4, 14.1;

HRMS (ESI)  $m/z$  calculated for  $[\text{C}_{31}\text{H}_{32}\text{N}_2\text{O}_4+\text{H}]^+$   $[\text{M}+\text{H}]^+$  497.2435, found: 497.2442.

**Diethyl 2-(2,5-dihydroxybenzyl)-1,5-diphenyl-1H-pyrrole-3,4-dicarboxylate (13aa)**

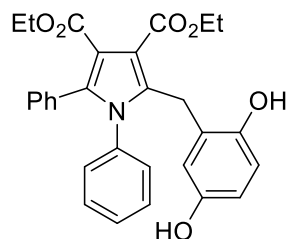

51.0 mg, 53% yield, colorless oil,  $R_f = 0.63$  (PE/EtOAc = 1:1);

$^1\text{H NMR}$  (500 MHz,  $\text{CDCl}_3$ )  $\delta$  7.93 (s, 1H), 7.32-7.29 (m, 1H), 7.25-7.22 (m, 2H), 7.13-7.08 (m, 3H), 7.03-7.01 (m, 2H), 6.87 (d,  $J = 7.2$  Hz, 2H), 6.59 (d,  $J = 8.6$  Hz, 1H), 6.45 (dd,  $J = 8.6$  Hz, 2.9 Hz, 1H), 5.27 (d,  $J = 2.7$  Hz, 1H), 4.91 (s, 1H), 4.35 (q,  $J = 7.2$  Hz, 2H), 4.12 (q,  $J = 7.2$  Hz, 2H), 4.03 (s, 2H), 1.32 (t,  $J = 7.2$  Hz, 3H), 1.10 (t,  $J = 7.2$  Hz, 3H);

$^{13}\text{C NMR}$  (125 MHz,  $\text{CDCl}_3$ )  $\delta$  167.6, 165.7, 149.0, 148.2, 137.1, 136.7, 136.5, 130.4, 130.0, 129.4, 129.2, 129.1, 128.1, 127.7, 122.8, 117.5, 117.0, 115.4, 115.0, 112.1, 61.6, 60.8, 27.3, 14.2, 14.0;

HRMS (ESI)  $m/z$  calculated for  $[\text{C}_{29}\text{H}_{27}\text{NO}_6+\text{H}]^+$   $[\text{M}+\text{H}]^+$  486.1911, found: 486.1922.

**Diethyl 2-((butylthio)methyl)-1,5-diphenyl-1H-pyrrole-3,4-dicarboxylate (14aa)**

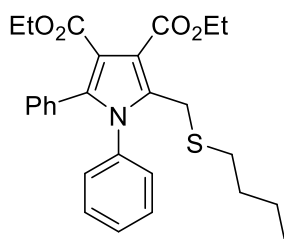

58.2 mg, 63% yield, colorless oil,  $R_f = 0.69$  (PE/EtOAc = 3:1);

$^1\text{H NMR}$  (500 MHz,  $\text{CDCl}_3$ )  $\delta$  7.30-7.28 (m, 3H), 7.18-7.12 (m, 7H), 4.31 (q,  $J = 7.1$  Hz, 2H), 4.15 (q,  $J = 7.1$  Hz, 2H), 3.87 (s, 2H), 2.42 (t,  $J = 7.4$  Hz, 2H), 1.41-1.25 (m, 7H), 1.12 (t,  $J = 7.2$  Hz, 3H), 0.83 (t,  $J = 7.3$  Hz, 3H);

$^{13}\text{C NMR}$  (125 MHz,  $\text{CDCl}_3$ )  $\delta$  165.8, 164.6, 136.4, 136.2, 135.9, 130.5, 130.3, 129.1, 129.0, 128.9, 128.0, 127.7, 116.2, 113.2, 60.8, 60.5, 32.2, 31.6, 25.8, 22.0, 14.4, 14.1, 13.7;

HRMS (ESI)  $m/z$  calculated for  $[\text{C}_{27}\text{H}_{31}\text{NO}_4\text{S}+\text{H}]^+$   $[\text{M}+\text{H}]^+$  466.2047, found: 466.2054.

#### Diethyl 2-(2,4-dimethoxybenzyl)-1,5-diphenyl-1H-pyrrole-3,4-dicarboxylate (15aa)

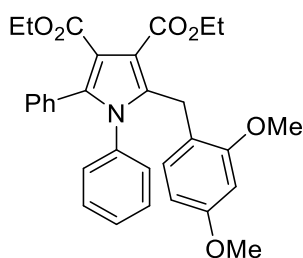

47.4 mg, 46% yield, colorless oil,  $R_f = 0.40$  (PE/EtOAc = 3:1);

$^1\text{H NMR}$  (500 MHz,  $\text{CDCl}_3$ )  $\delta$  7.20-7.17 (m, 1H), 7.12-7.11 (m, 7H), 6.82 (d,  $J = 7.7$  Hz, 2H), 6.74 (d,  $J = 8.3$  Hz, 1H), 6.31 (dd,  $J = 8.4$  Hz, 2.4 Hz, 1H), 6.24 (d,  $J = 2.3$  Hz, 1H), 4.25 (q,  $J = 7.1$  Hz, 2H), 4.18 (q,  $J = 7.1$  Hz, 1H), 4.01 (s, 2H), 3.73 (s, 3H), 3.52 (s, 3H), 1.24 (t,  $J = 7.1$  Hz, 3H), 1.15 (t,  $J = 7.1$  Hz, 3H);

$^{13}\text{C NMR}$  (125 MHz,  $\text{CDCl}_3$ )  $\delta$  166.0, 165.0, 159.2, 157.5, 137.9, 136.8, 135.7, 130.6, 129.7, 128.8, 128.7, 128.3, 127.8, 127.6, 119.5, 115.7, 113.9, 103.7, 97.9, 60.7, 60.3, 55.4, 55.1, 24.5, 14.3, 14.1;

HRMS (ESI)  $m/z$  calculated for  $[\text{C}_{31}\text{H}_{31}\text{NO}_6+\text{H}]^+$   $[\text{M}+\text{H}]^+$  514.2224, found: 514.2224.

#### Diethyl 2-((4-hydroxy-2-oxo-2H-chromen-3-yl)methyl)-1,5-diphenyl-1H-pyrrole-3,4-dicarboxylate (16aa)



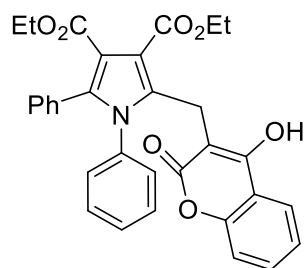

43.4 mg, 40% yield, white solid, m.p. 213-215 °C,  $R_f$  = 0.49 (PE/EtOAc = 1:1);

$^1\text{H}$  NMR (500 MHz,  $\text{CDCl}_3$ )  $\delta$  11.55 (s, 1H), 7.89 (dd,  $J$  = 7.9 Hz, 1.4 Hz, 1H), 7.47-7.44 (m, 1H), 7.36-7.33 (m, 1H), 7.27-7.23 (m, 3H), 7.17 (d,  $J$  = 8.3 Hz, 1H), 7.14-7.08 (m, 3H), 7.06-7.04 (m, 2H), 6.92 (d,  $J$  = 7.4 Hz, 2H), 4.48 (q,  $J$  = 7.2 Hz, 2H), 4.12 (q,  $J$  = 7.2 Hz, 2H), 4.07 (s, 2H), 1.42 (t,  $J$  = 7.2 Hz, 3H), 1.07 (t,  $J$  = 7.2 Hz, 3H);

$^{13}\text{C}$  NMR (125 MHz,  $\text{CDCl}_3$ )  $\delta$  170.1, 164.8, 162.7, 162.4, 152.5, 138.3, 137.3, 136.0, 131.8, 130.6, 130.0, 129.6, 129.4, 129.0, 128.3, 127.6, 123.8, 123.7, 116.6, 116.2, 114.4, 112.5, 100.2, 62.6, 60.7, 20.4, 14.1, 14.0;

HRMS (ESI)  $m/z$  calculated for  $[\text{C}_{32}\text{H}_{27}\text{NO}_7+\text{H}]^+$   $[\text{M}+\text{H}]^+$  538.1860, found: 538.1866.

**3-Ethyl 4-((1R,2S,5R)-2-isopropyl-5-methylcyclohexyl) 5-(hydroxymethyl)-1,2-diphenyl-1H-pyrrole-3,4-dicarboxylate (17aa)**

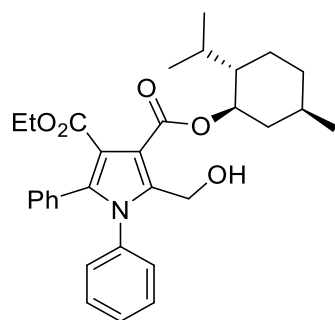

56.4 mg, 56% yield, colorless oil,  $R_f$  = 0.61 (PE/EtOAc = 3:1);

$^1\text{H}$  NMR (500 MHz,  $\text{CDCl}_3$ )  $\delta$  7.32-7.31 (m, 3H), 7.20-7.15 (m, 3H), 7.14-7.10 (m, 4H), 4.94 (td,  $J$  = 10.9 Hz, 4.4 Hz, 1H), 4.54 (d,  $J$  = 13.6 Hz, 1H), 4.48 (d,  $J$  = 13.6 Hz, 1H), 4.23-4.11 (m, 2H), 3.91 (brs, 1H), 2.18-2.15 (m, 1H), 2.06-2.00 (m, 1H), 1.72 (d,  $J$  = 11.5 Hz, 2H), 1.58-1.50 (m, 1H), 1.46-1.40 (m, 1H), 1.16 (t,  $J$  = 7.2 Hz, 3H), 1.13-1.06 (m, 2H), 0.94-0.91 (m, 6H), 0.89-0.86 (m, 1H), 0.80 (d,  $J$  = 7.0 Hz, 3H);

$^{13}\text{C}$  NMR (125 MHz,  $\text{CDCl}_3$ )  $\delta$  166.2, 165.0, 140.0, 136.1, 134.0, 130.3, 130.0, 129.3, 128.9, 128.5, 128.1, 127.9, 117.0, 113.1, 75.0, 61.2, 55.4, 47.3, 41.0, 34.3, 31.6, 25.9, 23.1, 22.1, 21.1, 16.1, 14.1;

HRMS (ESI)  $m/z$  calculated for  $[C_{31}H_{37}NO_5+H]^+$   $[M+H]^+$  504.2744, found: 504.2744.

**3-((3*S*,5*S*,8*R*,9*S*,10*S*,13*R*,14*S*,17*R*)-10,13-Dimethyl-17-((*R*)-6-methylheptan-2-yl)hexadecahydro-1*H*-cyclopenta[*a*]phenanthren-3-yl) 4-ethyl 2-(hydroxymethyl)-1,5-diphenyl-1*H*-pyrrole-3,4-dicarboxylate (17ab)**

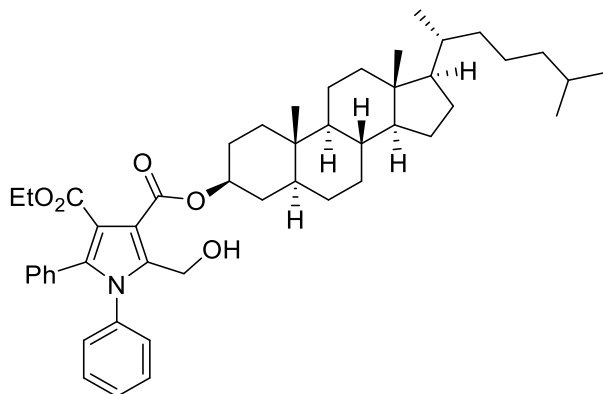

106.9 mg, 73% yield, colorless oil,  $R_f$  = 0.61 (PE/EtOAc = 3:1);

$^1H$  NMR (500 MHz,  $CDCl_3$ )  $\delta$  7.31-7.29 (m, 3H), 7.18-7.15 (m, 3H), 7.14-7.09 (m, 4H), 4.97-4.90 (m, 1H), 4.48 (s, 2H), 4.18 (q,  $J$  = 7.1 Hz, 2H), 3.84 (brs, 1H), 1.98-1.95 (m, 2H), 1.83-1.73 (m, 3H), 1.68-1.65 (m, 1H), 1.61-1.47 (m, 5H), 1.36-1.30 (m, 6H), 1.28-1.22 (m, 4H), 1.19-1.15 (m, 3H), 1.15-1.07 (m, 6H), 1.05-0.98 (m, 3H), 0.90 (d,  $J$  = 6.5 Hz, 3H), 0.86 (d,  $J$  = 2.4 Hz, 3H), 0.85 (d,  $J$  = 2.4 Hz, 3H), 0.84 (s, 3H), 0.70-0.67 (m, 1H), 0.65 (s, 3H);

$^{13}C$  NMR (125 MHz,  $CDCl_3$ )  $\delta$  165.9, 165.0, 139.7, 136.2, 134.6, 130.5, 130.0, 129.2, 128.8, 128.5, 128.2, 127.9, 116.6, 113.7, 74.7, 61.1, 56.5, 56.3, 55.3, 54.3, 44.8, 42.7, 40.1, 39.6, 36.9, 36.3, 35.9, 35.6, 35.6, 34.1, 32.1, 28.7, 28.4, 28.1, 27.6, 24.3, 23.9, 23.0, 22.7, 21.3, 18.8, 14.1, 12.4, 12.2;

HRMS (ESI)  $m/z$  calculated for  $[C_{48}H_{65}NO_5+H]^+$   $[M+H]^+$  736.4936, found: 736.4929.

**3-Ethyl 4-((5*R*,5*aR*,8*aR*,9*R*)-8-oxo-9-(3,4,5-trimethoxyphenyl)-5,5*a*,6,8,8*a*,9-hexahydrofuro[3',4':6,7]naphtho[2,3-*d*][1,3]dioxol-5-yl) 5-(hydroxymethyl)-1,2-diphenyl-1*H*-pyrrole-3,4-dicarboxylate (17ac)**

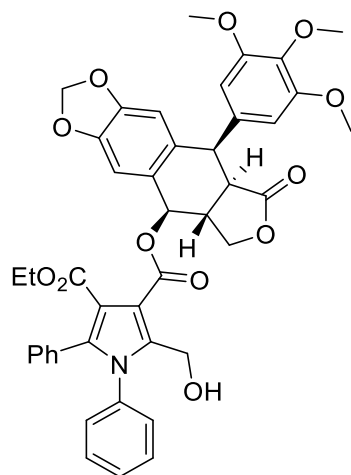

107.8 mg, 71% yield, white solid, m.p. 246-248 °C,  $R_f = 0.38$  (PE/EtOAc = 1:1);

$^1\text{H}$  NMR (500 MHz,  $\text{CDCl}_3$ )  $\delta$  7.33-7.29 (m, 3H), 7.18-7.13 (m, 3H), 7.08-7.07 (m, 3H), 6.95 (s, 1H), 6.52 (s, 1H), 6.40 (s, 2H), 6.12 (d,  $J = 8.5$  Hz, 1H), 5.94-5.92 (m, 3H), 4.60 (d,  $J = 3.7$  Hz, 1H), 4.56-4.52 (m, 3H), 4.30-4.25 (m, 1H), 3.97-3.92 (m, 1H), 3.85-3.82 (m, 1H), 3.77 (s, 3H), 3.76 (s, 6H), 3.71-3.70 (m, 2H), 0.94 (t,  $J = 7.1$  Hz, 3H);

$^{13}\text{C}$  NMR (125 MHz,  $\text{CDCl}_3$ )  $\delta$  174.0, 165.8, 165.3, 152.7, 148.1, 147.6, 140.3, 135.9, 135.6, 135.1, 132.5, 130.5, 129.9, 129.3, 129.1, 128.52, 128.49, 128.4, 127.9, 116.5, 112.3, 109.9, 108.1, 107.3, 101.6, 74.3, 71.7, 60.9, 60.8, 56.3, 56.2, 55.1, 45.6, 43.9, 38.7, 13.8;

HRMS (ESI)  $m/z$  calculated for  $[\text{C}_{43}\text{H}_{39}\text{NO}_{12}+\text{H}]^+$   $[\text{M}+\text{H}]^+$  762.2545, found: 762.2548.

**3-Ethyl 4-((3R,4S,5R,6R)-3,4,5-tris(benzyloxy)-6-((benzyloxy)methyl)tetrahydro-2H-pyran-2-yl) 5-(hydroxymethyl)-1,2-diphenyl-1H-pyrrole-3,4-dicarboxylate (17ad)**

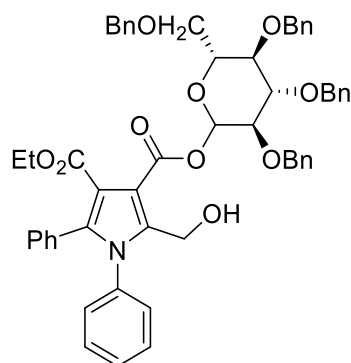

145.2 mg, 82% yield, white solid, m.p. 231-233 °C,  $R_f = 0.76$  (PE/EtOAc = 1:1);

$^1\text{H}$  NMR (500 MHz,  $\text{CDCl}_3$ )  $\delta$  7.37-7.27 (m, 23H), 7.20-7.15 (m, 7H), 5.02 (d,  $J = 10.9$  Hz, 1H), 4.89 (d,  $J = 4.4$  Hz, 1H), 4.87 (d,  $J = 4.5$  Hz, 1H), 4.79 (d,  $J = 11.2$  Hz, 1H), 4.73 (d,  $J = 14.5$  Hz, 1H), 4.65 (d,  $J = 12.1$  Hz, 1H), 4.54 (d,  $J = 10.9$  Hz, 1H), 4.49 (d,  $J = 12.1$  Hz, 1H), 4.39 (d,  $J = 9.3$

Hz, 1H), 4.23-4.17 (m, 2H), 4.10-4.06 (m, 1H), 3.98 (d,  $J = 9.9$  Hz, 2H), 3.85-3.79 (m, 4H), 3.71-3.70 (m, 1H), 0.99 (t,  $J = 7.2$  Hz, 3H);

$^{13}\text{C}$  NMR (125 MHz,  $\text{CDCl}_3$ )  $\delta$  165.9, 163.1, 140.4, 138.8, 138.5, 138.0, 137.5, 136.1, 135.1, 130.4, 130.1, 129.3, 129.0, 128.7, 128.52, 128.51, 128.38, 128.35, 128.2, 128.13, 128.10, 128.02, 127.97, 127.85, 127.82, 127.75, 127.71, 117.3, 112.3, 90.8, 82.3, 78.7, 76.9, 75.9, 75.1, 73.7, 73.4, 73.2, 68.1, 61.4, 55.2, 13.9;

HRMS (ESI)  $m/z$  calculated for  $[\text{C}_{55}\text{H}_{53}\text{NO}_{10}+\text{H}]^+$   $[\text{M}+\text{H}]^+$  888.3742, found: 888.3735.

**3-Ethyl 4-(((2*S*,5*R*)-5-(5-methyl-2,4-dioxo-3,4-dihydropyrimidin-1(2*H*)-yl)-2,5-dihydrofuran-2-yl)methyl) 5-(hydroxymethyl)-1,2-diphenyl-1*H*-pyrrole-3,4-dicarboxylate (17ae)**

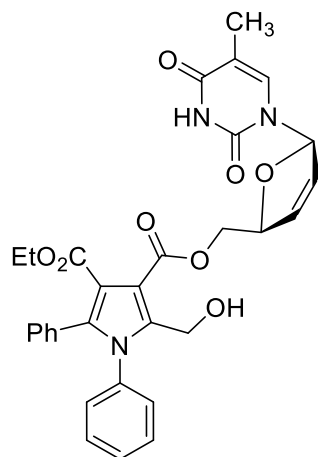

58.3 mg, 51% yield, white solid, m.p. 283-285 °C,  $R_f = 0.38$  (EtOAc);

$^1\text{H}$  NMR (500 MHz,  $\text{CDCl}_3$ )  $\delta$  9.32 (s, 1H), 7.30-7.28 (m, 3H), 7.16-7.12 (m, 4H), 7.07-7.05 (m, 3H), 7.01 (s, 1H), 6.41 (d,  $J = 5.9$  Hz, 1H), 5.83 (d,  $J = 5.2$  Hz, 1H), 5.08 (s, 1H), 4.64 (d,  $J = 12.1$  Hz, 1H), 4.49-4.46 (m, 1H), 4.43-4.39 (m, 2H), 4.13-4.03 (m, 3H), 3.55 (t,  $J = 6.8$  Hz, 1H), 1.63 (s, 3H), 1.00 (t,  $J = 7.1$  Hz, 3H);

$^{13}\text{C}$  NMR (125 MHz,  $\text{CDCl}_3$ )  $\delta$  165.2, 165.1, 164.1, 151.0, 139.9, 136.2, 135.8, 134.0, 130.6, 129.9, 129.3, 129.0, 128.5, 128.4, 127.8, 126.8, 116.0, 113.0, 111.3, 89.7, 84.2, 65.1, 60.9, 60.5, 54.8, 14.0, 11.7;

HRMS (ESI)  $m/z$  calculated for  $[\text{C}_{31}\text{H}_{29}\text{N}_3\text{O}_8+\text{Na}]^+$   $[\text{M}+\text{Na}]^+$  594.1847, found: 594.1852.

**Diethyl 1-(2-(1*H*-indol-3-yl)ethyl)-2-(hydroxymethyl)-5-phenyl-1*H*-pyrrole-3,4-dicarboxylate**

**(17af)**

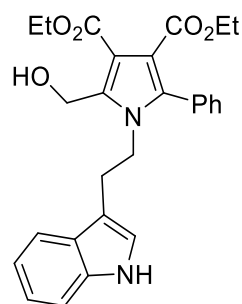

43.4 mg, 47% yield, colorless oil,  $R_f = 0.34$  (PE/EtOAc = 1:1);

$^1\text{H NMR}$  (500 MHz,  $\text{CDCl}_3$ )  $\delta$  8.16 (s, 1H), 7.45-7.42 (m, 1H), 7.39-7.36 (m, 2H), 7.26-7.25 (m, 3H), 7.13-7.10 (m, 1H), 6.94-6.91 (m, 1H), 6.83 (d,  $J = 7.9$  Hz, 1H), 6.73 (d,  $J = 2.0$  Hz, 1H), 4.68 (s, 2H), 4.32 (q,  $J = 7.1$  Hz, 2H), 4.09-4.05 (m, 4H), 3.68 (brs, 1H), 2.93-2.90 (m, 2H), 1.34 (t,  $J = 7.1$  Hz, 3H), 1.04 (t,  $J = 7.1$  Hz, 3H);

$^{13}\text{C NMR}$  (125 MHz,  $\text{CDCl}_3$ )  $\delta$  165.8, 165.4, 138.0, 136.2, 135.9, 130.8, 130.6, 128.9, 128.5, 126.9, 122.4, 122.1, 119.5, 118.2, 115.7, 113.4, 111.3, 111.2, 60.9, 60.6, 54.8, 45.5, 27.5, 14.3, 14.0;

HRMS (ESI)  $m/z$  calculated for  $[\text{C}_{27}\text{H}_{28}\text{N}_2\text{O}_5 + \text{H}]^+$   $[\text{M} + \text{H}]^+$  461.2071, found: 461.2075.

**Diethyl 2-(hydroxymethyl)-1-(2-oxo-4-(trifluoromethyl)-2H-chromen-7-yl)-5-phenyl-1H-pyrrole-3,4-dicarboxylate (17ag)**

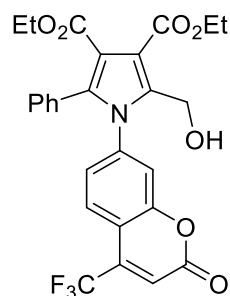

66.9 mg, 63% yield, white solid, m.p. 201-203 °C,  $R_f = 0.79$  (PE/EtOAc = 1:1);

$^1\text{H NMR}$  (500 MHz,  $\text{CDCl}_3$ )  $\delta$  7.68 (d,  $J = 8.5$  Hz, 1H), 7.25-7.18 (m, 4H), 7.17-7.13 (m, 3H), 6.80 (s, 1H), 4.50 (s, 2H), 4.34 (q,  $J = 7.1$  Hz, 2H), 4.15 (q,  $J = 7.1$  Hz, 2H), 3.51 (s, 1H), 1.35 (t,  $J = 7.1$  Hz, 3H), 1.14 (t,  $J = 7.1$  Hz, 3H);

$^{13}\text{C NMR}$  (125 MHz,  $\text{CDCl}_3$ )  $\delta$  165.1, 165.0, 158.0, 154.2, 140.8 (q,  $J = 33.0$  Hz), 140.2, 139.0, 135.1, 130.6, 129.2, 128.9, 128.3, 126.1 (q,  $J = 2.2$  Hz), 125.2, 117.8, 117.2, 117.1 (q,  $J = 6.0$  Hz), 114.8, 113.6, 61.23, 61.15, 54.8, 14.3, 14.1;

$^{19}\text{F}$  NMR (470 MHz,  $\text{CDCl}_3$ )  $\delta$  -64.67;

HRMS (ESI)  $m/z$  calculated for  $[\text{C}_{27}\text{H}_{22}\text{F}_3\text{NO}_7+\text{H}]^+$   $[\text{M}+\text{H}]^+$  530.1421, found: 530.1426.

**3-Ethyl 5-methyl 2-((2-(3,4-bis(ethoxycarbonyl)-2-(hydroxymethyl)-5-phenyl-1H-pyrrol-1-yl)ethoxy)methyl)-4-(2-chlorophenyl)-6-methyl-1,4-dihydropyridine-3,5-dicarboxylate (17ah)**

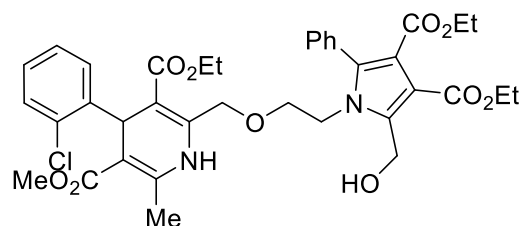

124.0 mg, 88% yield, white solid; m.p. 259-261 °C,  $R_f$  = 0.36 (PE/EtOAc = 1:1);

$^1\text{H}$  NMR (500 MHz,  $\text{CDCl}_3$ )  $\delta$  7.34-7.30 (m, 5H), 7.20 (d,  $J$  = 8.0 Hz, 1H), 7.13-7.10 (m, 1H), 7.03-7.00 (m, 2H), 5.45 (s, 1H), 5.37 (d,  $J$  = 4.0 Hz, 1H), 4.73 (s, 1H), 4.73 (d,  $J$  = 15.9 Hz, 0.5 H), 4.63 (d,  $J$  = 5.6 Hz, 1H), 4.55 (d,  $J$  = 15.9 Hz, 0.5 H), 4.11-4.07 (m, 1H), 4.04-3.97 (m, 3H), 3.68-3.61 (m, 3H), 3.583 (s, 1.5 H), 3.581 (s, 1.5 H), 3.25-3.17 (m, 2H), 2.551 (s, 1.5 H), 2.546 (s, 1.5 H), 2.28 (s, 3H), 1.16-1.12 (m, 6H), 0.71 (t,  $J$  = 7.2 Hz, 3H);

$^{13}\text{C}$  NMR (125 MHz,  $\text{CDCl}_3$ )  $\delta$  173.1, 168.1, 168.0, 167.18, 167.17, 165.5, 165.4, 145.8, 145.7, 144.87, 144.86, 144.14, 144.13, 137.88, 137.87, 132.38, 132.36, 131.5, 129.3, 128.9, 127.5, 127.2, 127.0, 104.03, 104.0, 101.8, 101.7, 96.5, 85.0, 70.6, 70.5, 68.1, 68.0, 62.44, 62.42, 60.0, 58.9, 50.9, 42.1, 37.2, 19.34, 19.32, 14.5, 14.3, 13.4, 12.8;

HRMS (ESI)  $m/z$  calculated for  $[\text{C}_{37}\text{H}_{41}\text{ClN}_2\text{O}_{10}+\text{H}]^+$   $[\text{M}+\text{H}]^+$  709.2522, found: 709.2510.

## References

- [1] N. Jha, R. P. Singh, P. Saxena, M. Kapur. *Org. Lett.*, **2021**, *23*, 8694-8698.
- [2] P. F. Yuan, Q. B. Zhang, X. L. Jin, W. L. Lei, L. Z. Zhu, Q. Liu. *Green Chem.*, **2018**, *20*, 5464-5468.
- [3] J. Qian, R. Wani, C. Klomsiri, L. B. Poole, A. W. Tsang, C. M. Furdui. *Chem. Commun.*, **2012**, *48*, 4091-4093.
- [4] W. Huang, C. L. Zhu, M. K. Li, Y. Yu, W. Q. Wu, Z. C. Tu, H. F. Jiang, *Adv. Synth. Catal.*, **2018**, *360*, 3117-3123.
- [5] Q. Sha, H. Arman, M. P. Doyle, *Chem. Commun.* **2016**, *52*, 108-111.
- [6] Q. Sha, J. K. Wang, M. P. Doyle, *J. Org. Chem.* **2018**, *83(18)*, 11288-11297.
- [7] H. Dahn, L. H. Dao, R. Hunma, *Helv. Chim. Acta.* **1982**, *65(8)*, 2458-2463.
- [8] H. Asahara, N. Nishiwaki, *J. Org. Chem.* **2014**, *79(23)*, 11735-11739.
- [9] S. P. Stanforth, B. Tarbit, M. D. Watson, *Tetrahedron*, **2004**, *60(40)*, 8893-8897.

# $^1\text{H}$ and $^{13}\text{C}$ spectra of starting materials, pyrroles 4-17

## But-3-yn-1-yl 3-oxobutanoate (19)

$^1\text{H}$  NMR (500 MHz,  $\text{CDCl}_3$ )

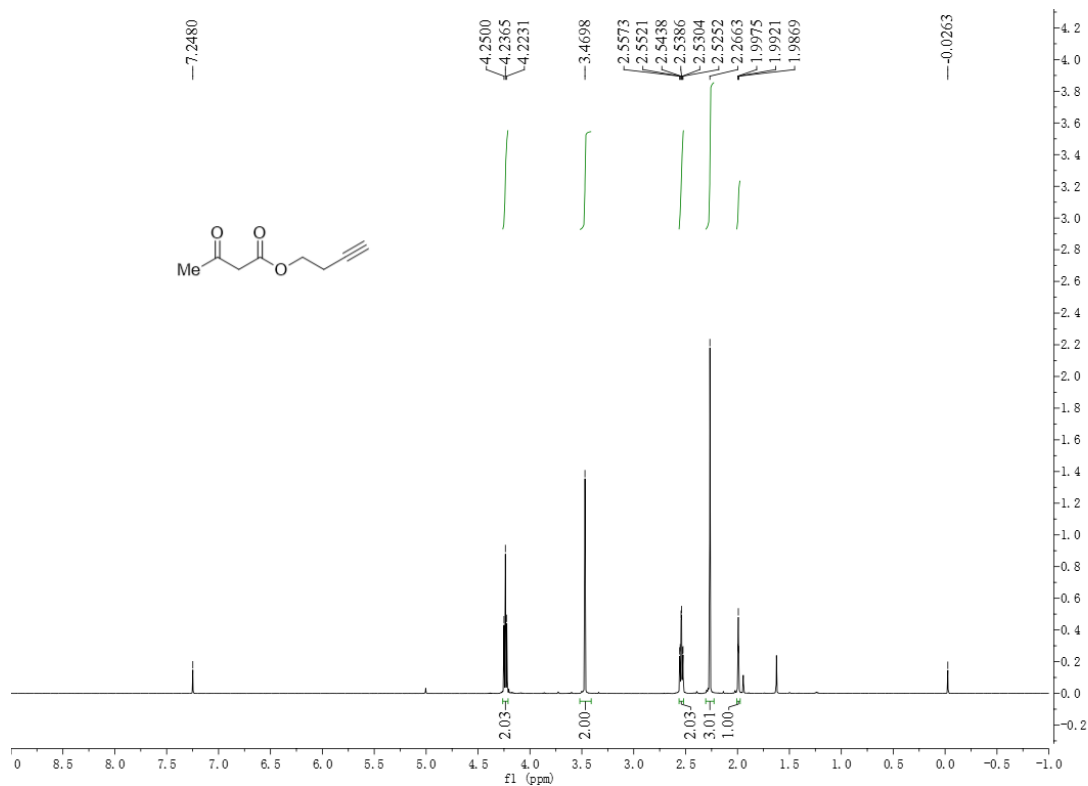

$^{13}\text{C}$  NMR (125 MHz,  $\text{CDCl}_3$ )

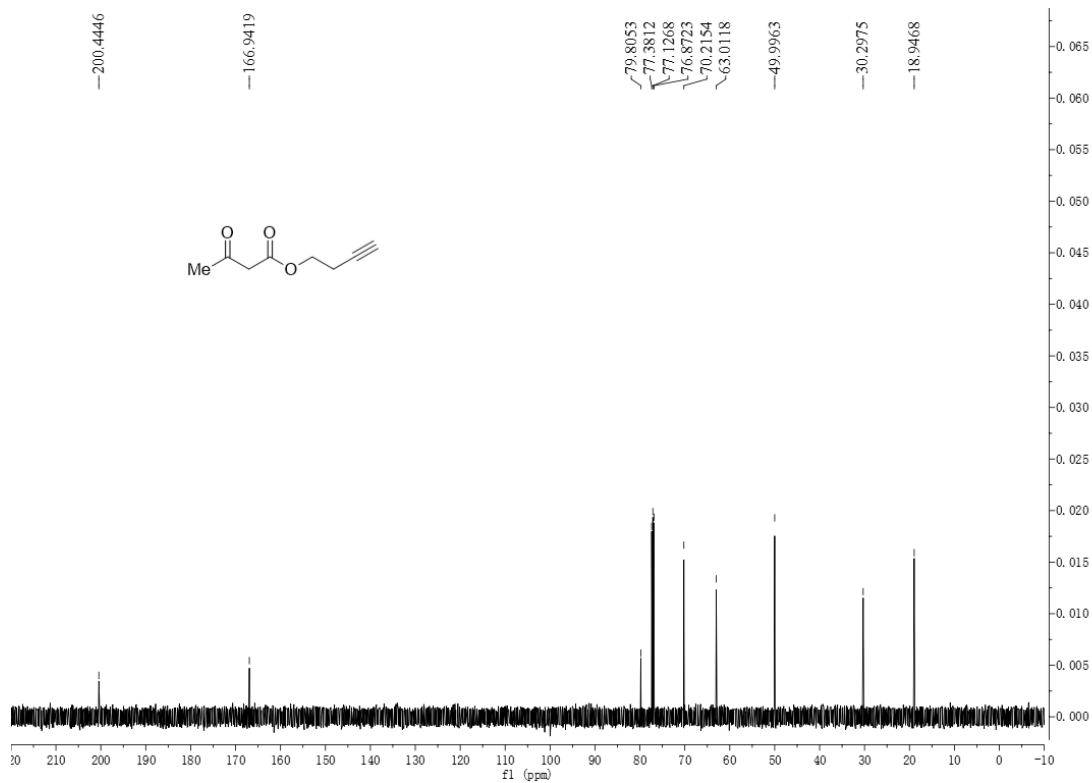



## 2-Cyanoethyl 3-oxobutanoate (20)

$^1\text{H}$  NMR (500 MHz,  $\text{CDCl}_3$ )

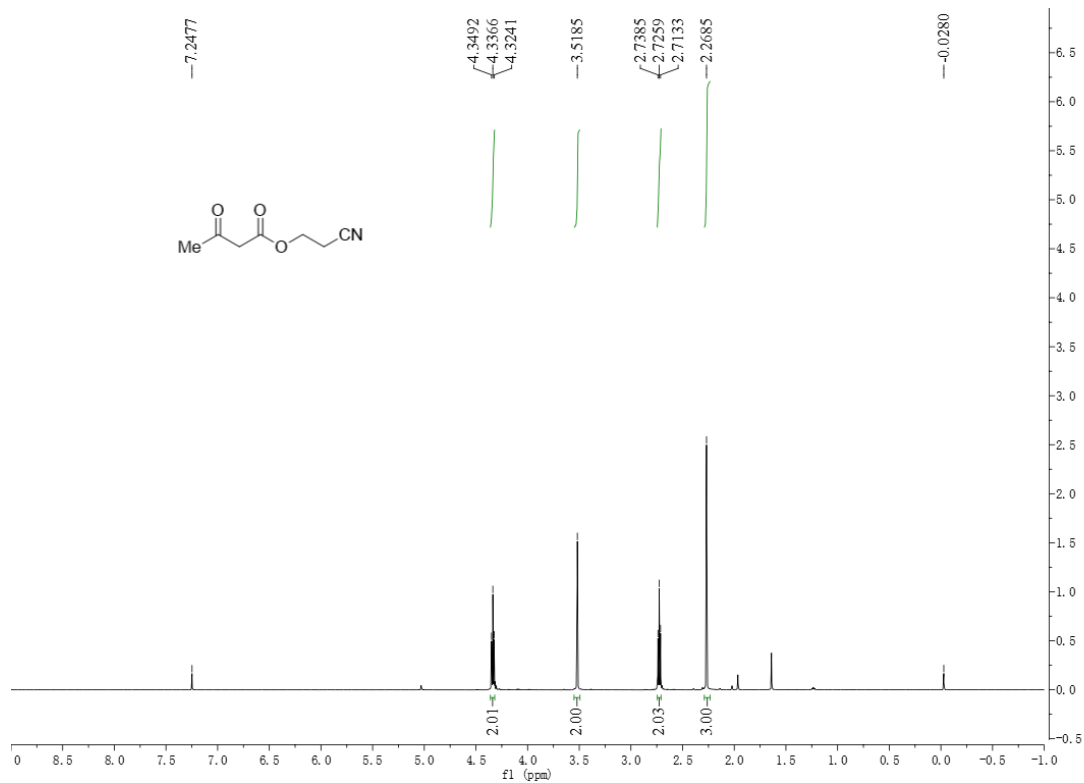

$^{13}\text{C}$  NMR (125 MHz,  $\text{CDCl}_3$ )

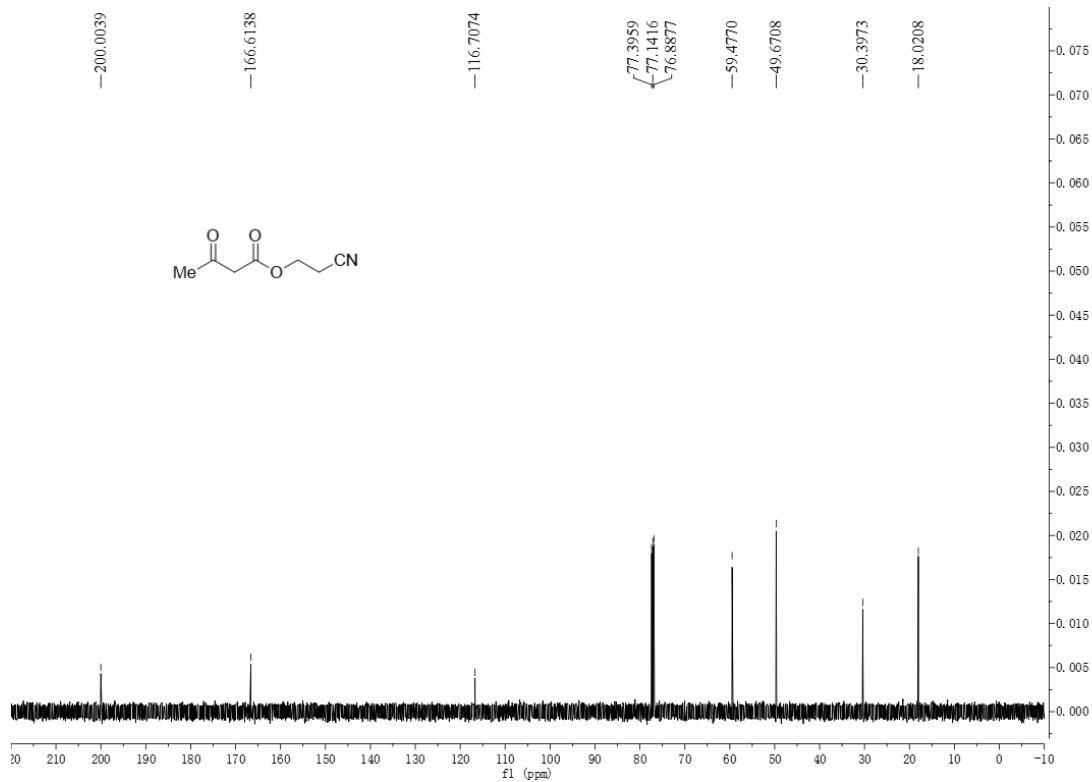

**(5*R*,5*aR*,8*aR*,9*R*)-8-oxo-9-(3,4,5-trimethoxyphenyl)-5,5*a*,6,8,8*a*,9-hexahydrofuro[3',4':6,7]naphtho[2,3-*d*][1,3]dioxol-5-yl 3-oxobutanoate (23)**

<sup>1</sup>H NMR (500 MHz, CDCl<sub>3</sub>)

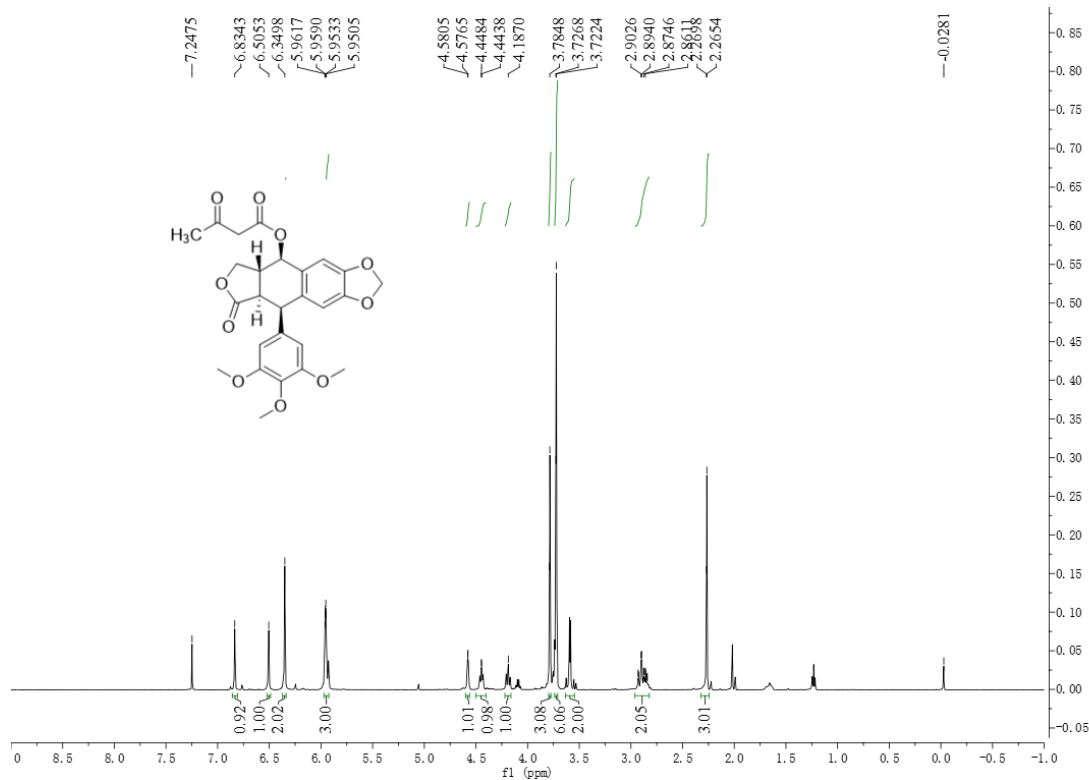

<sup>13</sup>C NMR (101 MHz, CDCl<sub>3</sub>)

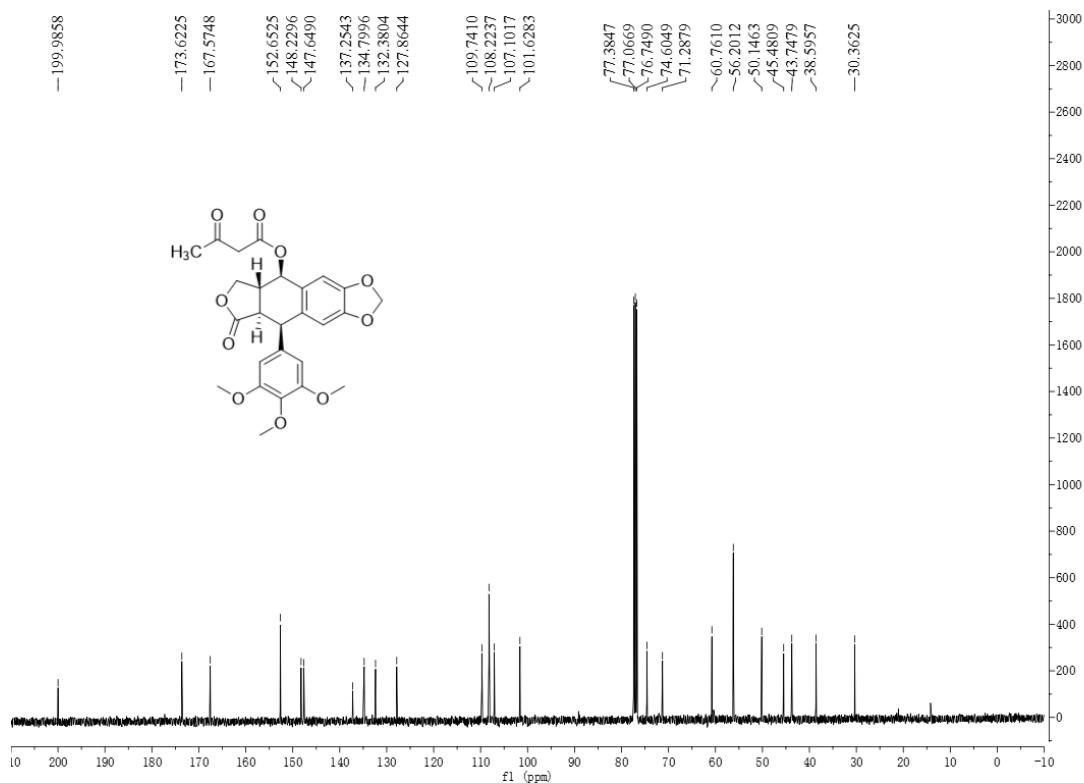

**((2*S*,5*R*)-5-(5-Methyl-2,4-dioxo-3,4-dihydropyrimidin-1(2*H*)-yl)-2,5-dihydrofuran-2-yl)methyl 3-oxobutanoate (25)**

<sup>1</sup>H NMR (500 MHz, CDCl<sub>3</sub>)

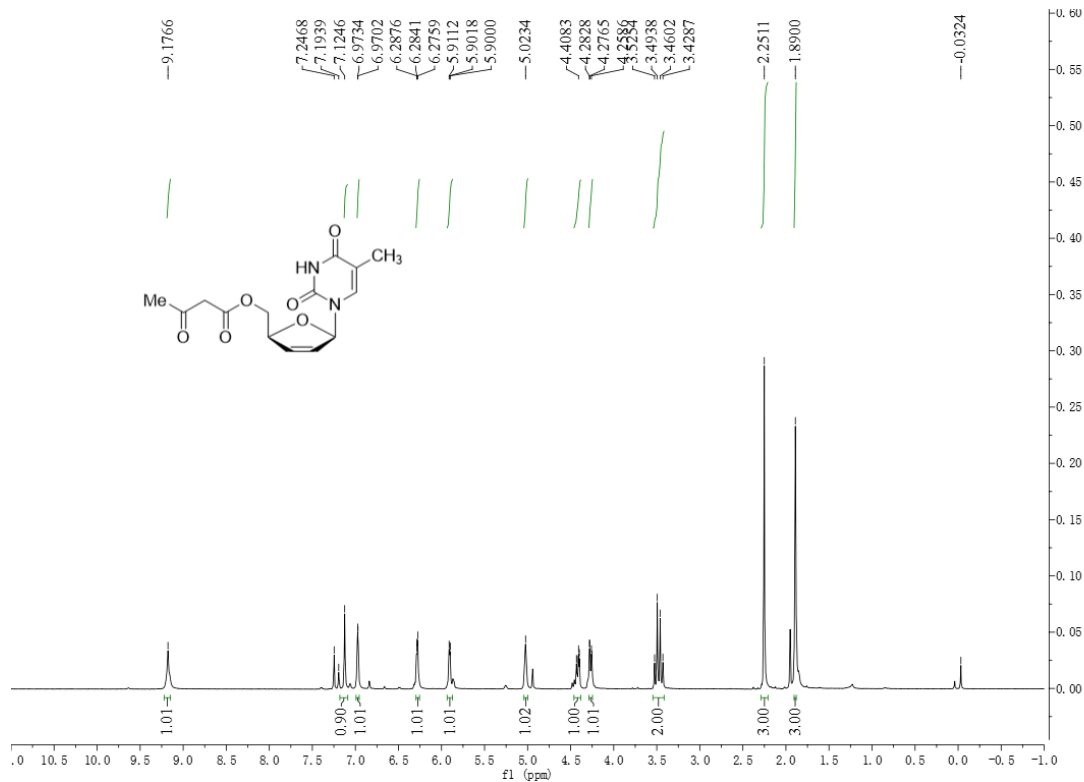

<sup>13</sup>C NMR (101 MHz, CDCl<sub>3</sub>)

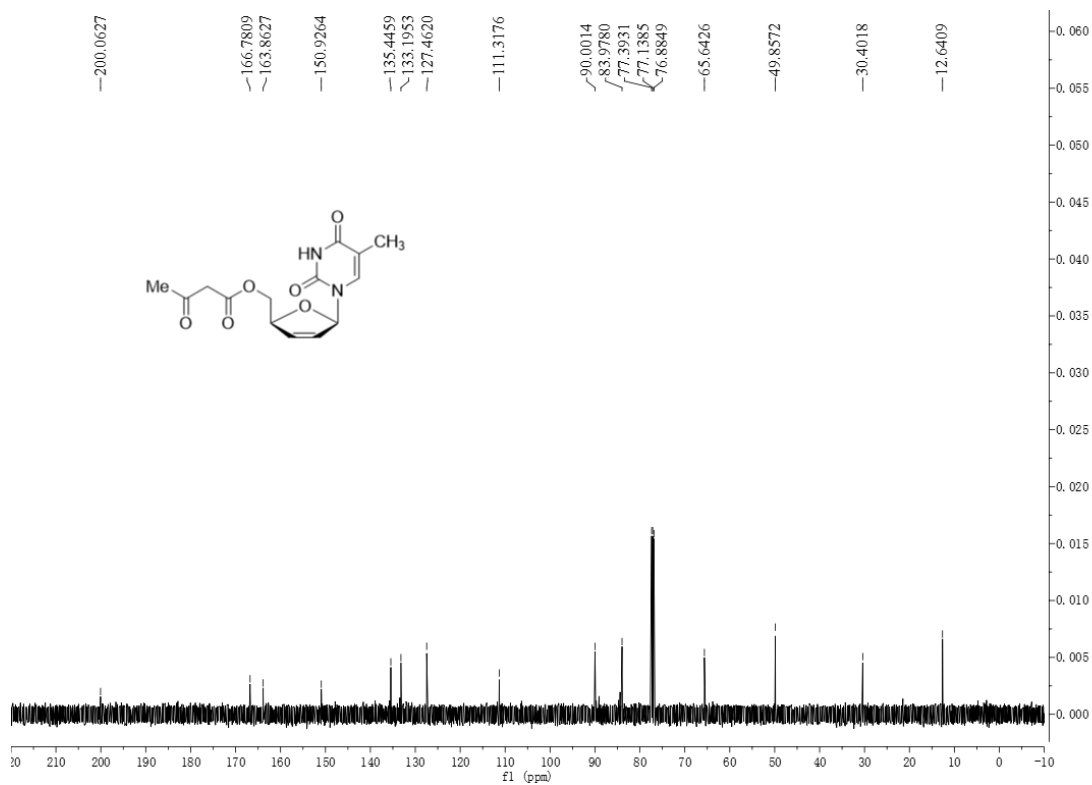

# Ethyl (Z)-3-((4-(cyanomethyl)phenyl)amino)but-2-enoate (9)

<sup>1</sup>H NMR (500 MHz, CDCl<sub>3</sub>)

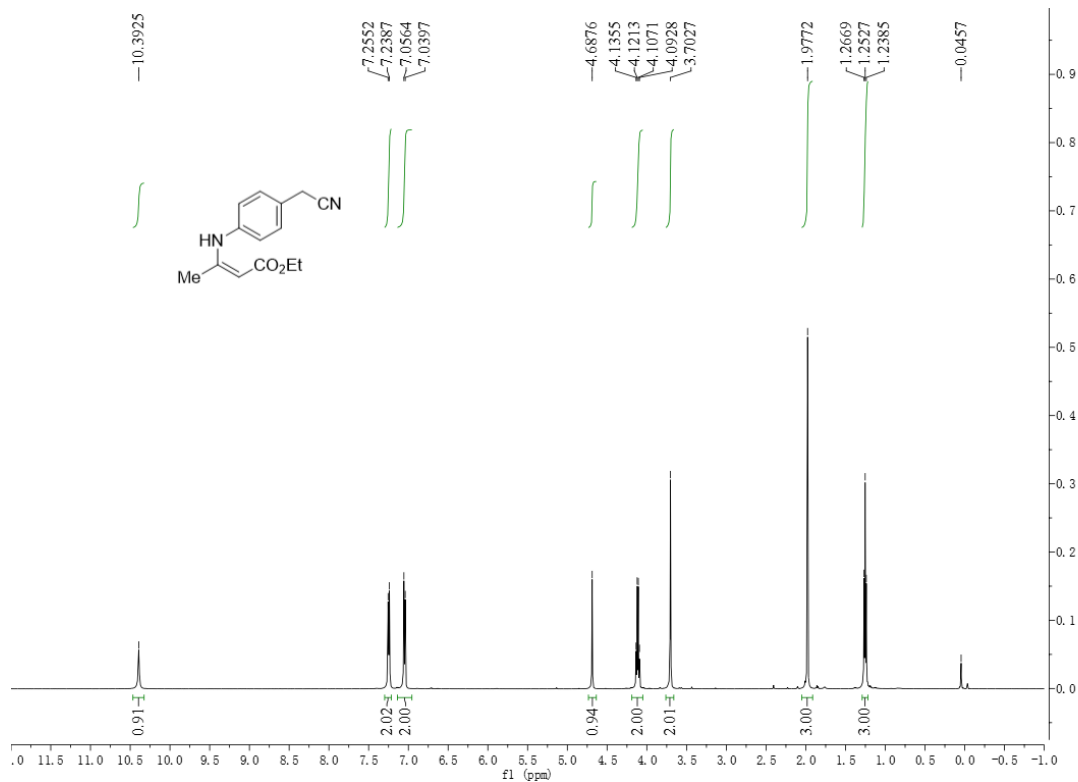

<sup>13</sup>C NMR (125 MHz, CDCl<sub>3</sub>)

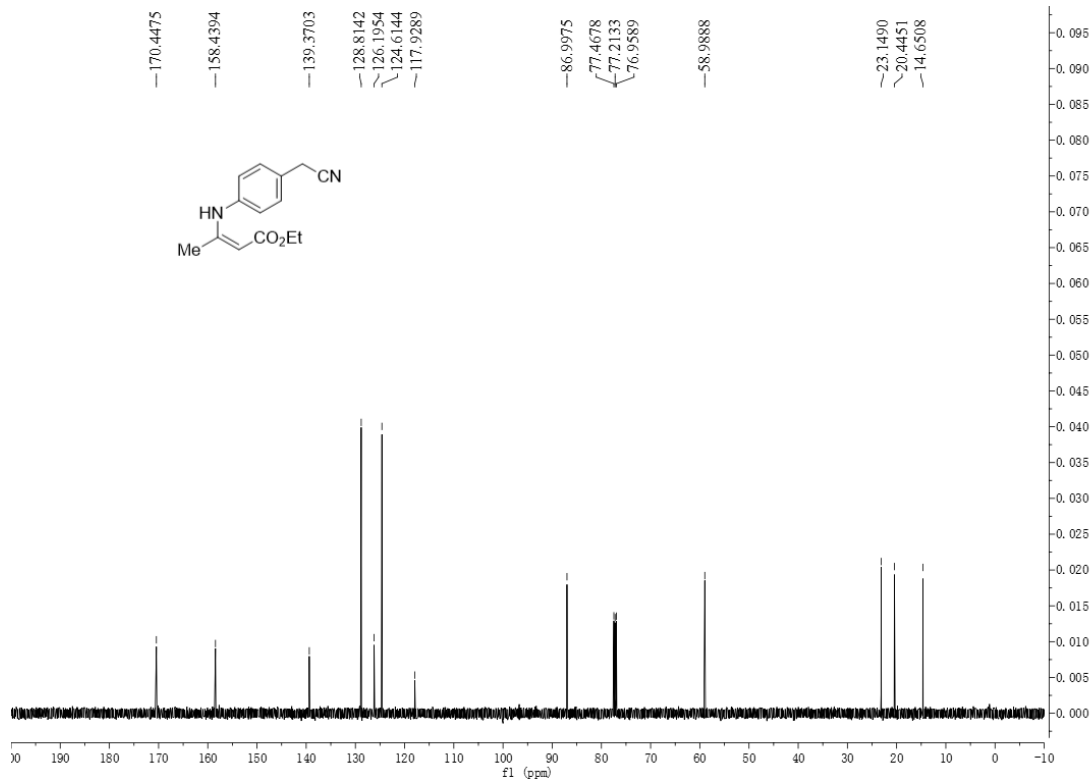

# Ethyl (Z)-3-((4-(methylthio)phenyl)amino)but-2-enoate (10)

<sup>1</sup>H NMR (500 MHz, CDCl<sub>3</sub>)

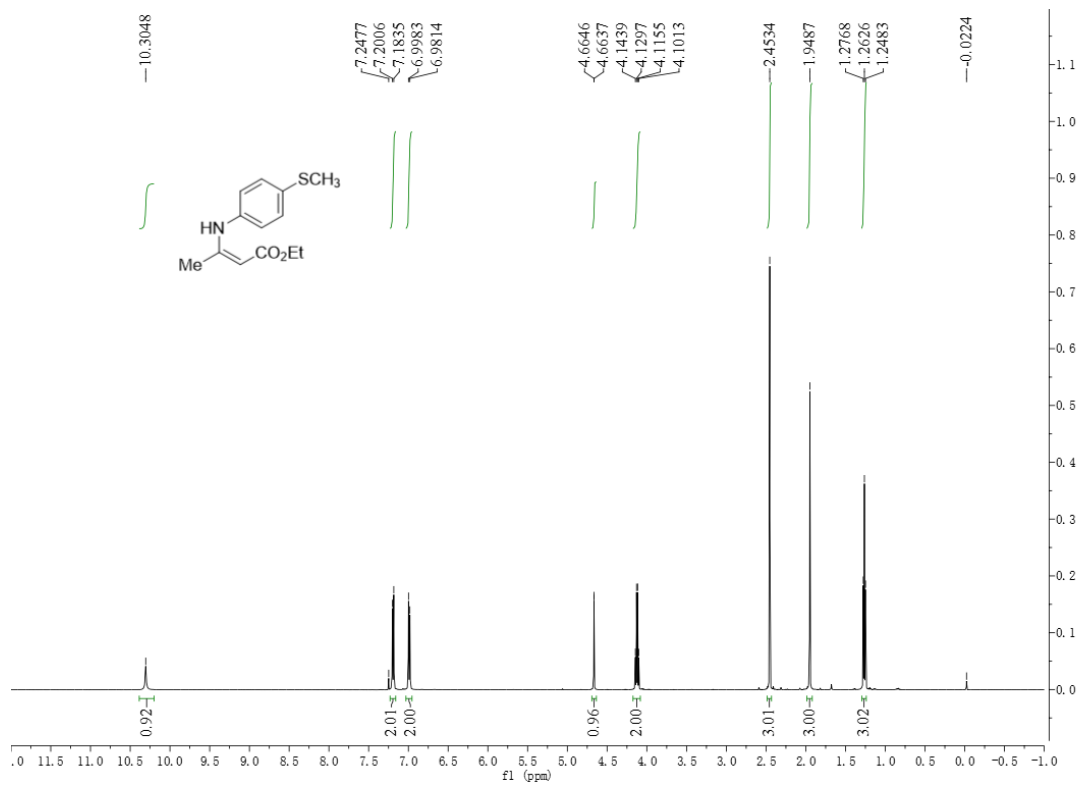

<sup>13</sup>C NMR (125 MHz, CDCl<sub>3</sub>)

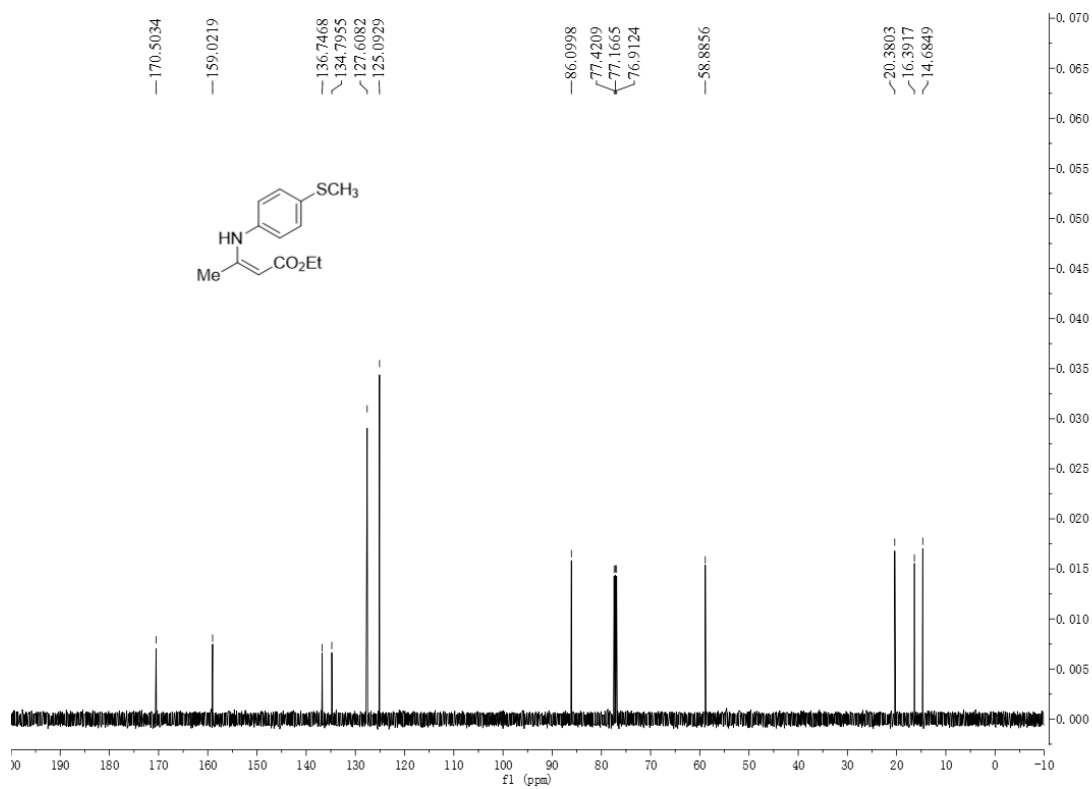

# Ethyl (Z)-3-((7-hydroxynaphthalen-1-yl)amino)but-2-enoate (14)

<sup>1</sup>H NMR (500 MHz, CDCl<sub>3</sub>)

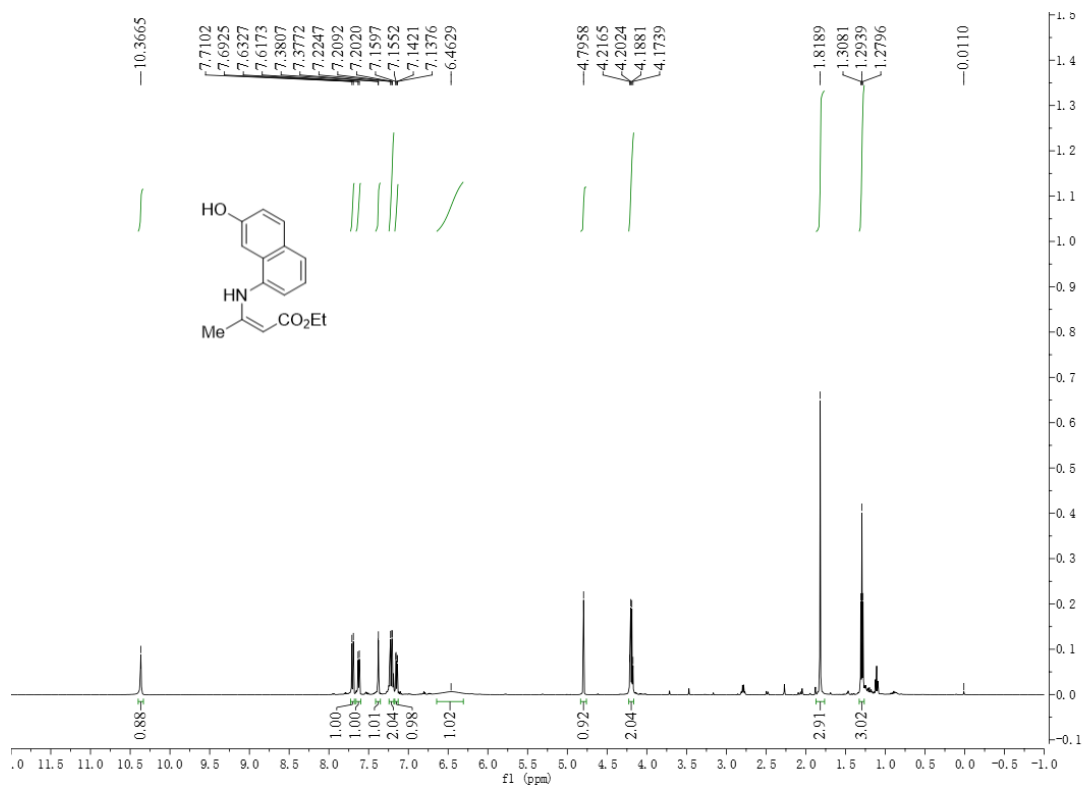

<sup>13</sup>C NMR (125 MHz, CDCl<sub>3</sub>)

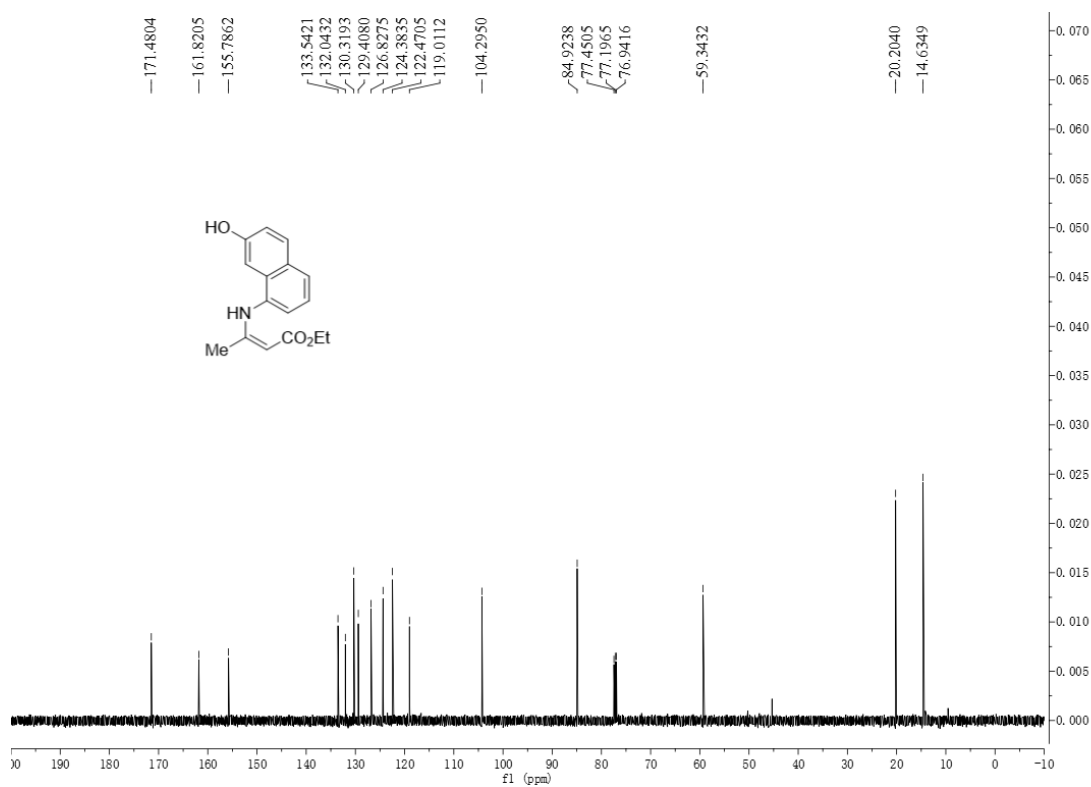

# Ethyl (Z)-3-((5-hydroxynaphthalen-1-yl)amino)but-2-enoate (15)

<sup>1</sup>H NMR (500 MHz, CDCl<sub>3</sub>)

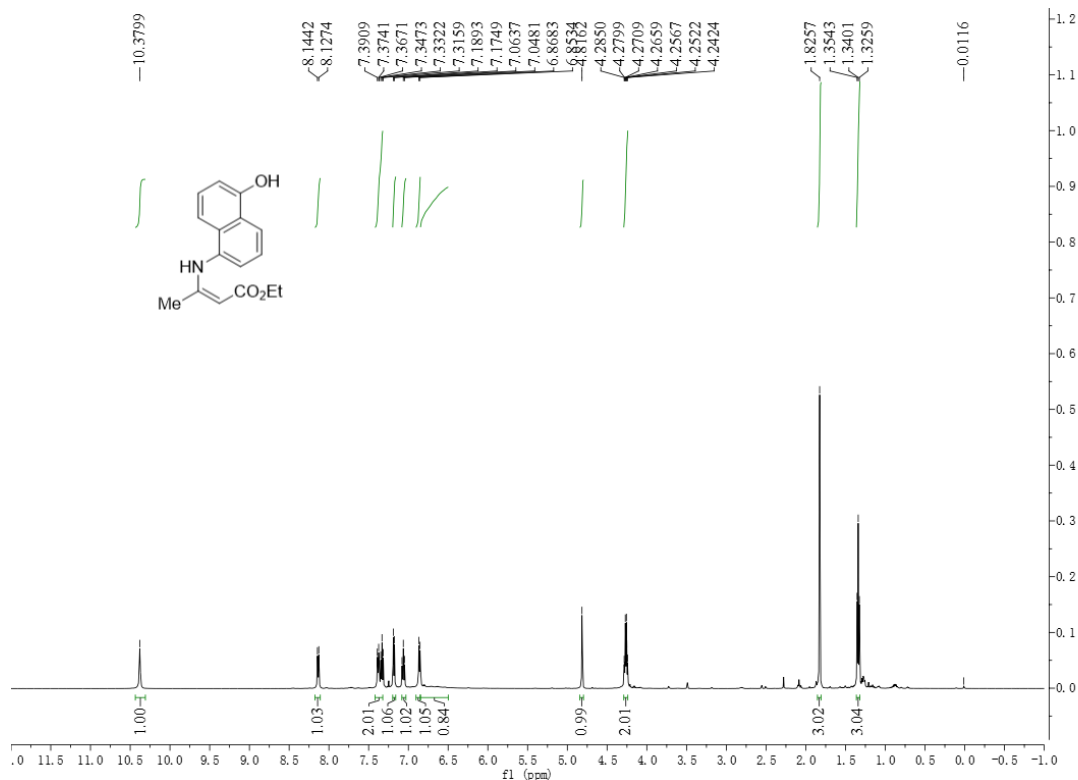

<sup>13</sup>C NMR (125 MHz, CDCl<sub>3</sub>)

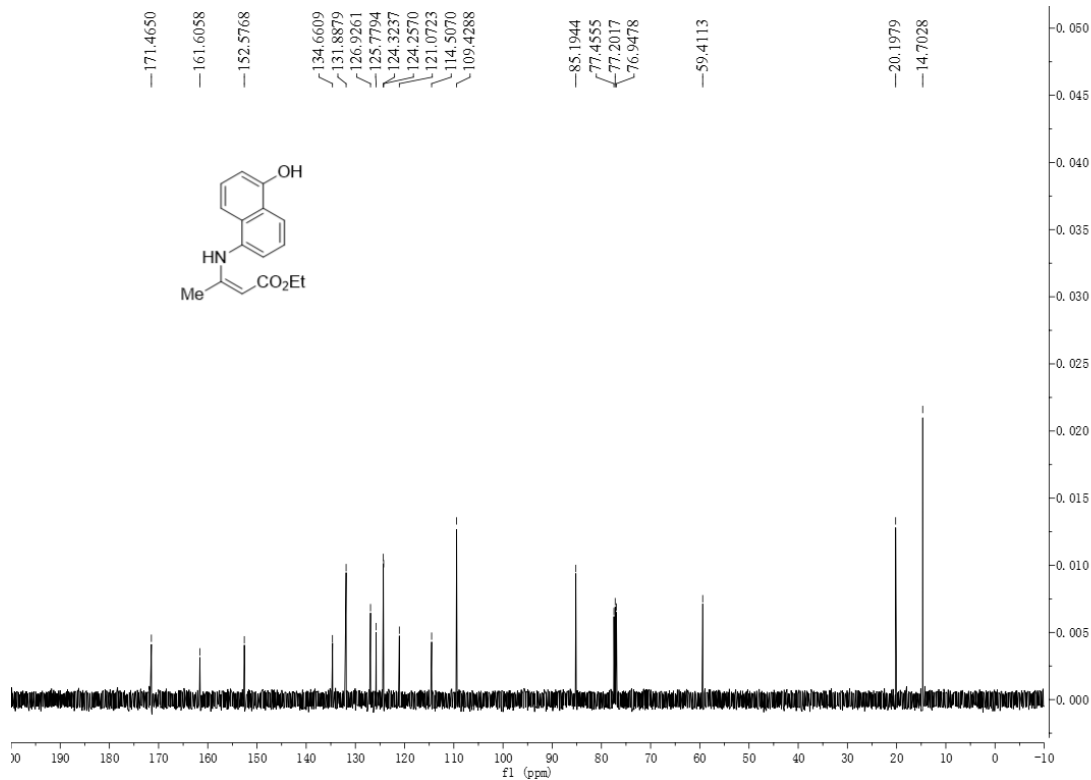

### Ethyl (Z)-3-((1H-indol-5-yl)amino)but-2-enoate (16)

<sup>1</sup>H NMR (500 MHz, CDCl<sub>3</sub>)

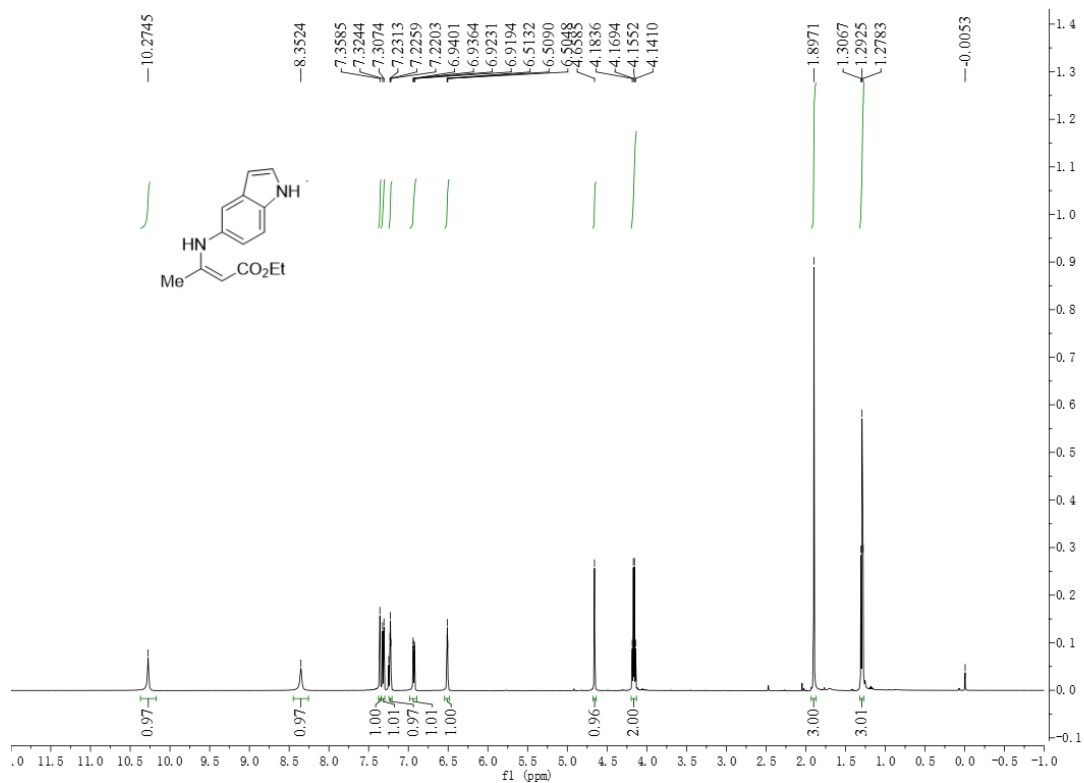

<sup>13</sup>C NMR (125 MHz, CDCl<sub>3</sub>)

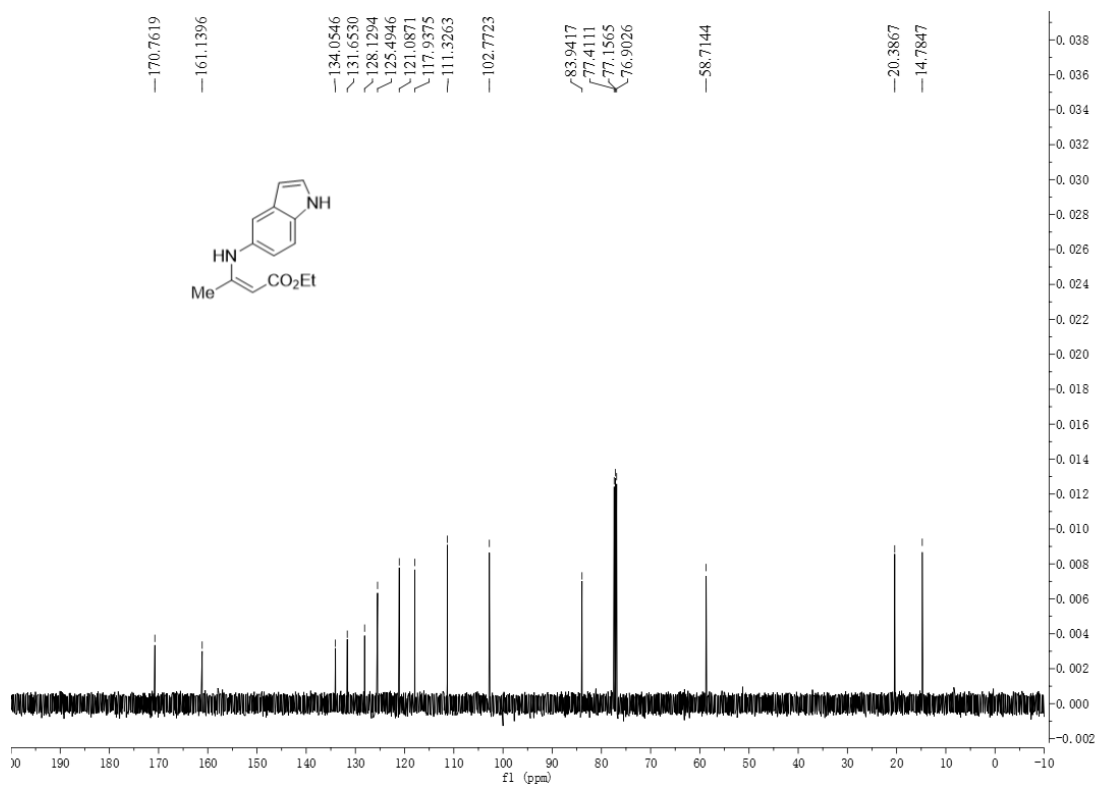



### Allyl (Z)-3-(phenylamino)but-2-enoate (24)

<sup>1</sup>H NMR (500 MHz, CDCl<sub>3</sub>)

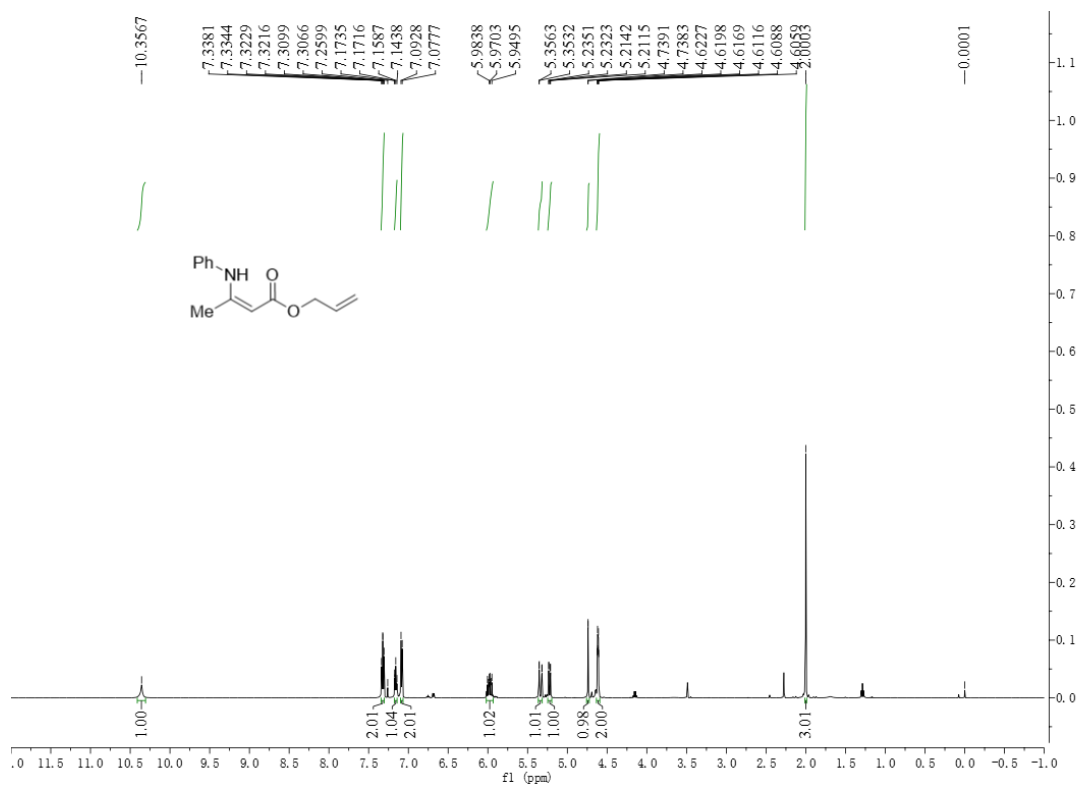

<sup>13</sup>C NMR (125 MHz, CDCl<sub>3</sub>)

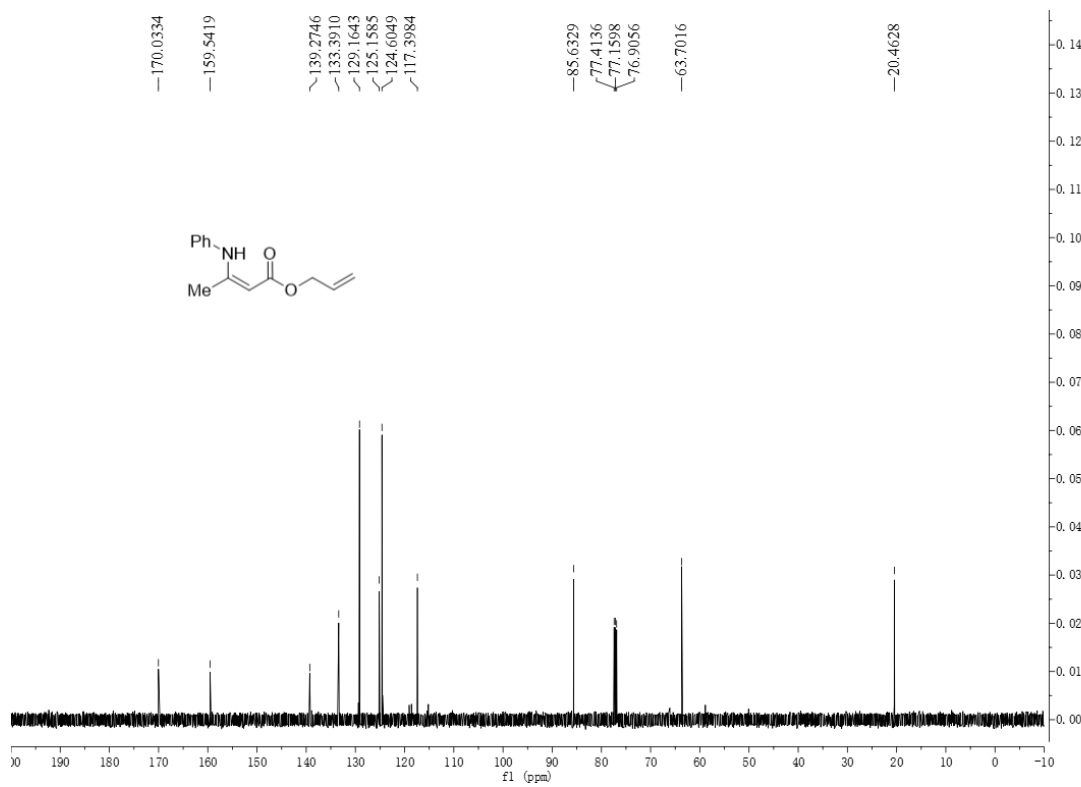

### But-3-yn-1-yl (Z)-3-(phenylamino)but-2-enoate (25)

<sup>1</sup>H NMR (500 MHz, CDCl<sub>3</sub>)

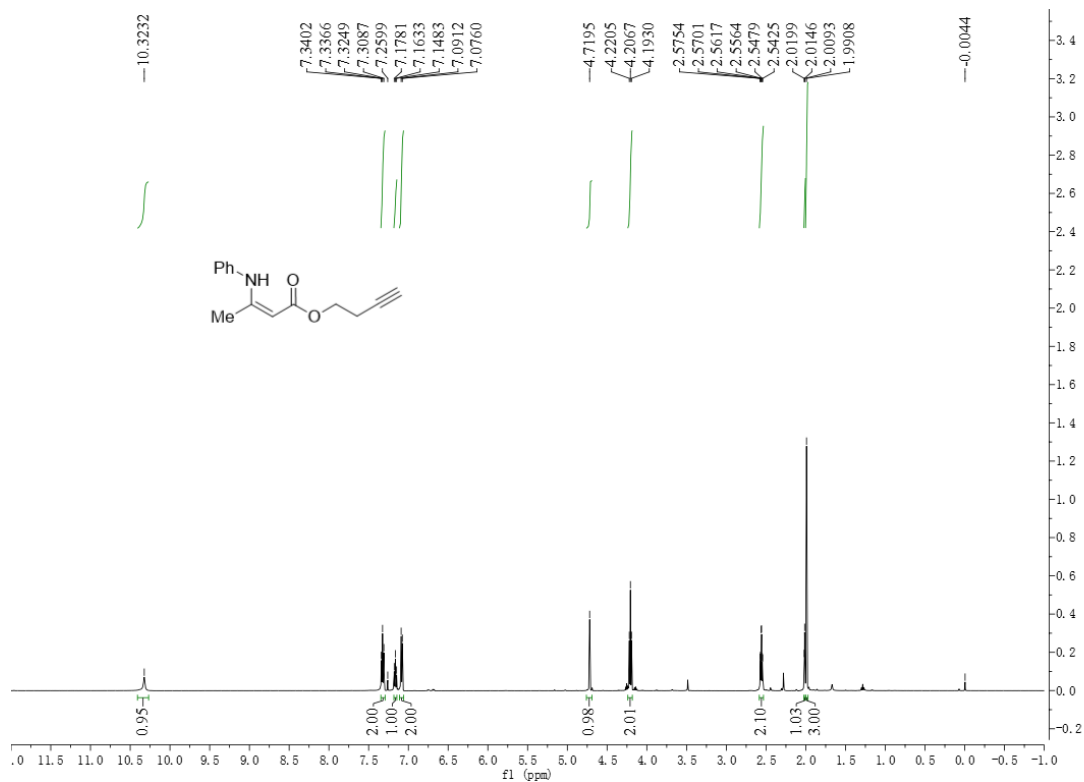

<sup>13</sup>C NMR (125 MHz, CDCl<sub>3</sub>)

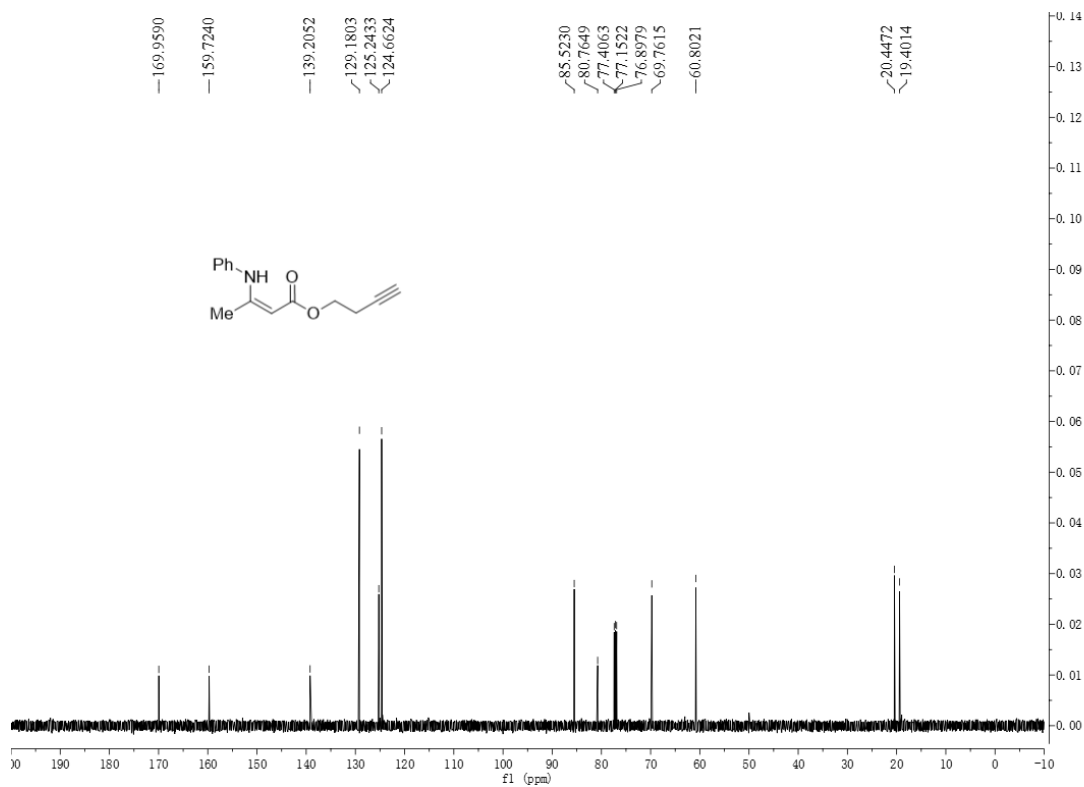

## 2-Cyanoethyl (Z)-3-(phenylamino)but-2-enoate (26)

$^1\text{H}$  NMR (500 MHz,  $\text{CDCl}_3$ )

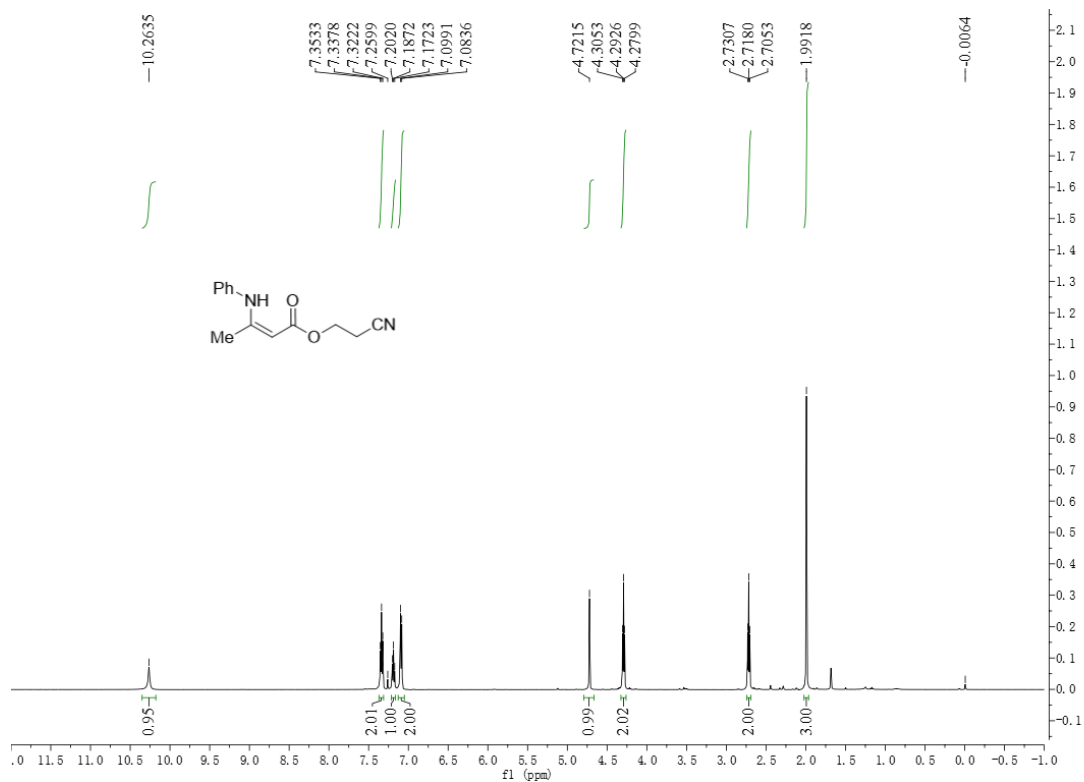

$^{13}\text{C}$  NMR (125 MHz,  $\text{CDCl}_3$ )

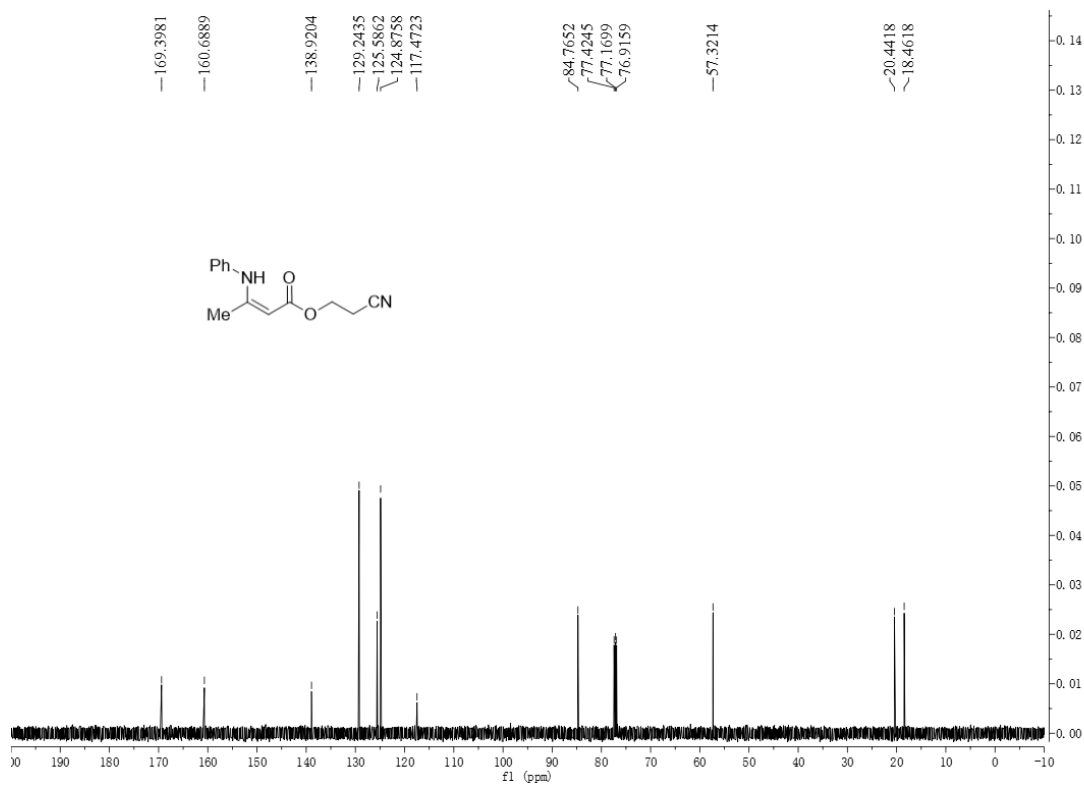

**(1*R*,2*S*,5*R*)-2-isopropyl-5-methylcyclohexyl (*Z*)-3-(phenylamino)but-2-enoate (27)**

<sup>1</sup>H NMR (500 MHz, CDCl<sub>3</sub>)

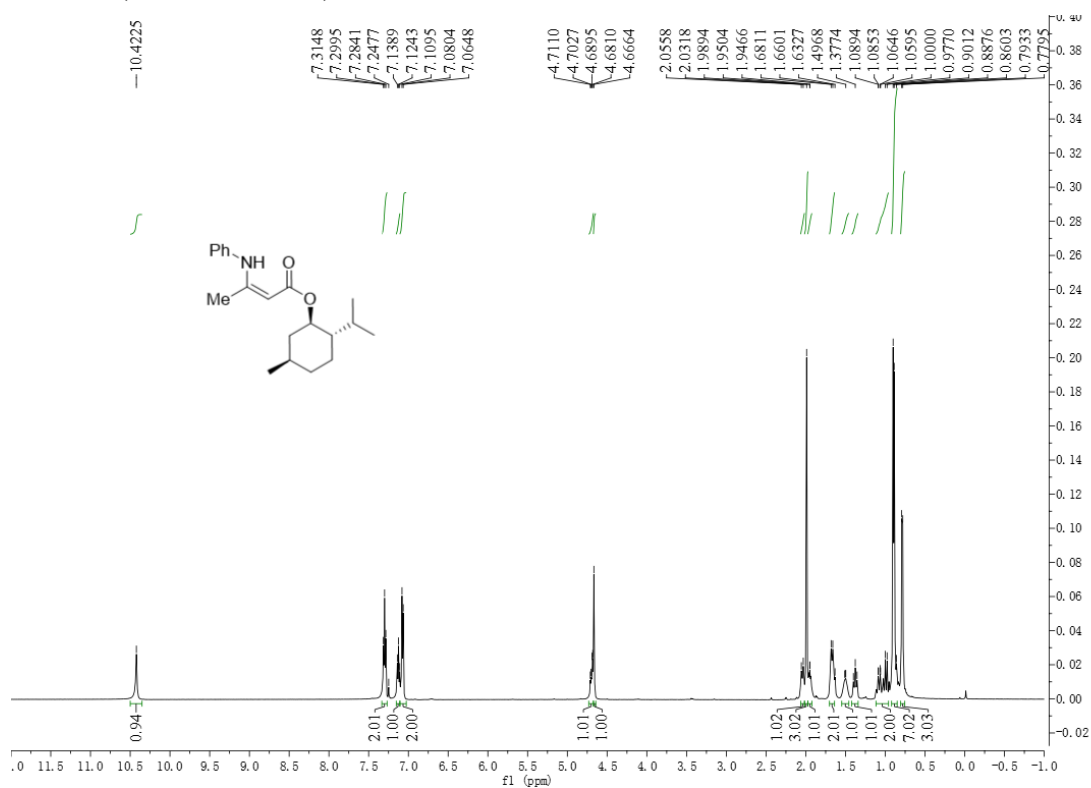

<sup>13</sup>C NMR (125 MHz, CDCl<sub>3</sub>)

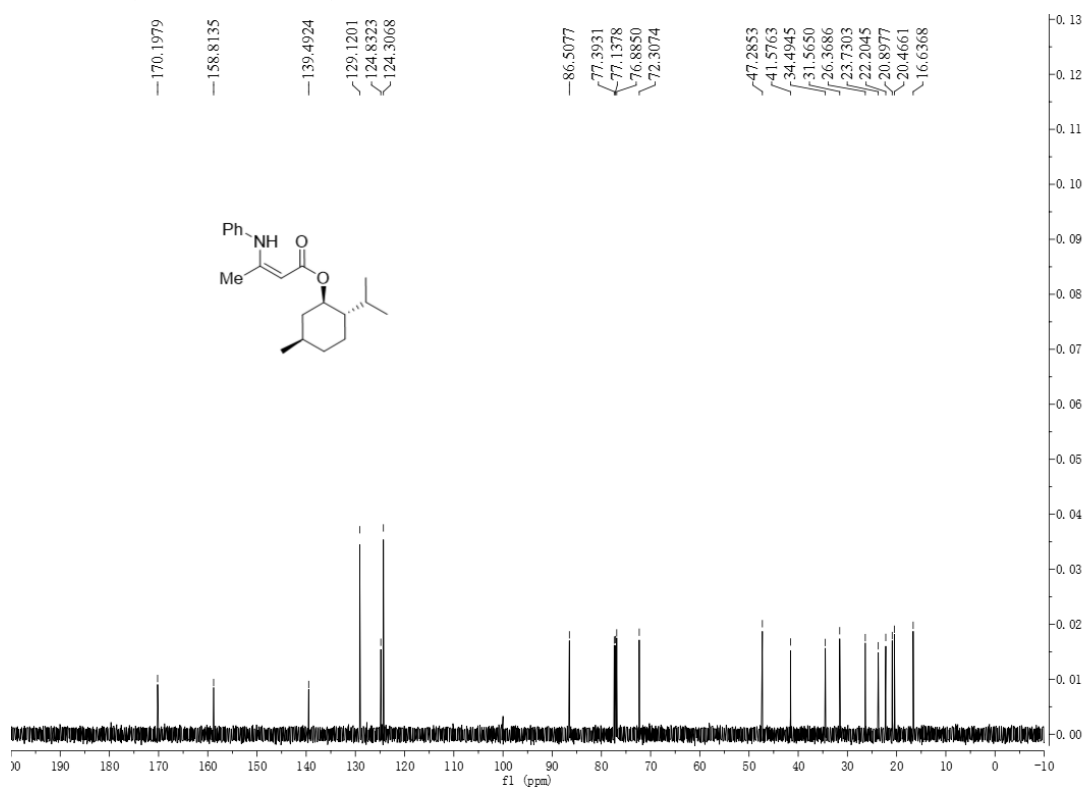

**(3*S*,5*S*,8*R*,9*S*,10*S*,13*R*,14*S*,17*R*)-10,13-dimethyl-17-((*R*)-6-methylheptan-2-yl)hexadecahydro-1*H*-cyclopenta[*a*]phenanthren-3-yl (*Z*)-3-(phenylamino)but-2-enoate (28)**

<sup>1</sup>H NMR (500 MHz, CDCl<sub>3</sub>)

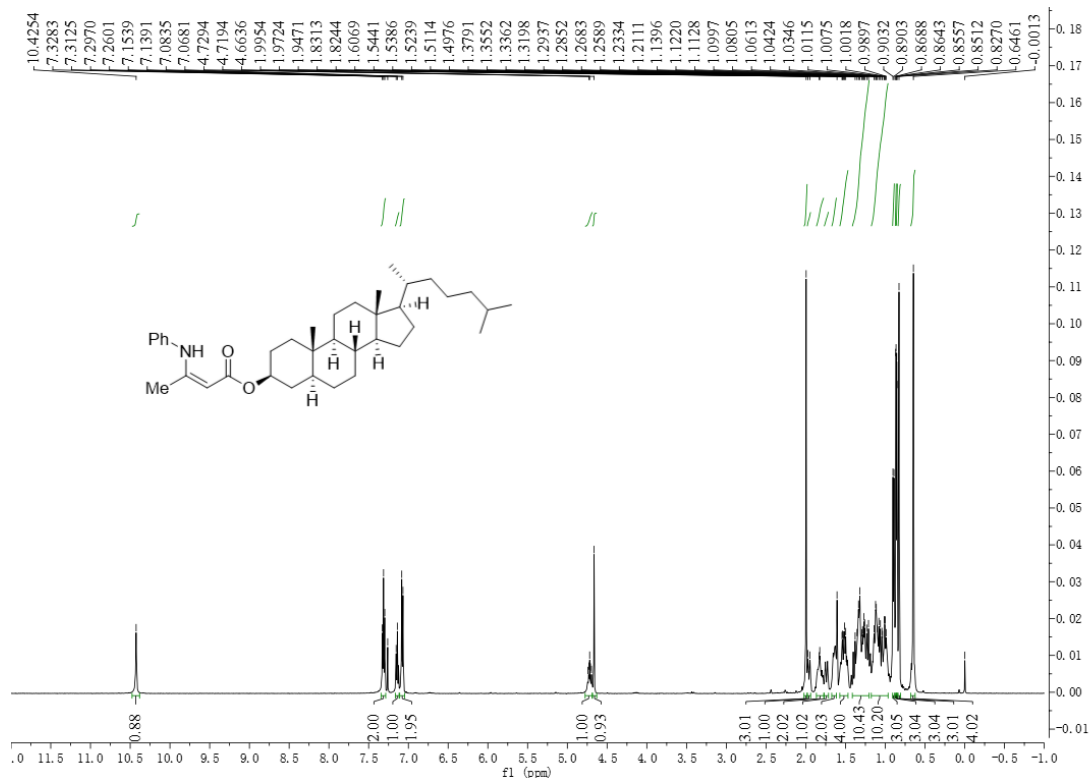

<sup>13</sup>C NMR (125 MHz, CDCl<sub>3</sub>)

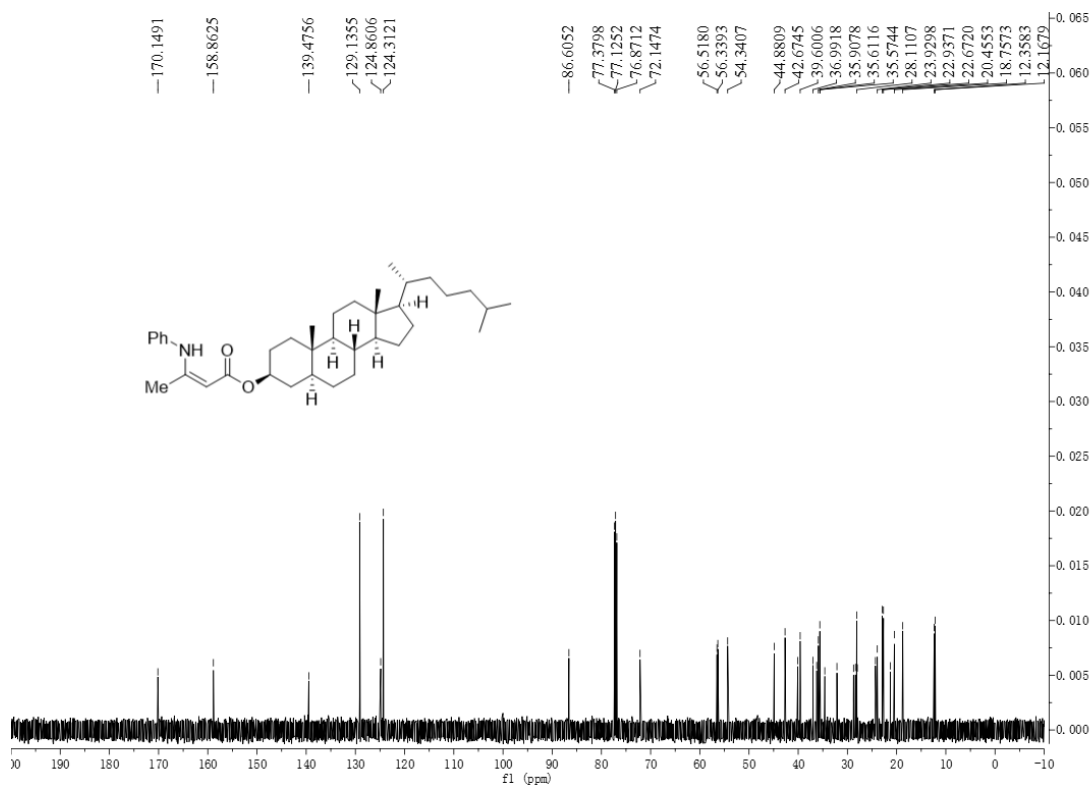

**(3R,4S,5R,6R)-3,4,5-Tris(benzyloxy)-6-((benzyloxy)methyl)tetrahydro-2H-pyran-2-yl (Z)-3-(phenylamino)but-2-enoate (29)**

<sup>1</sup>H NMR (500 MHz, CDCl<sub>3</sub>)

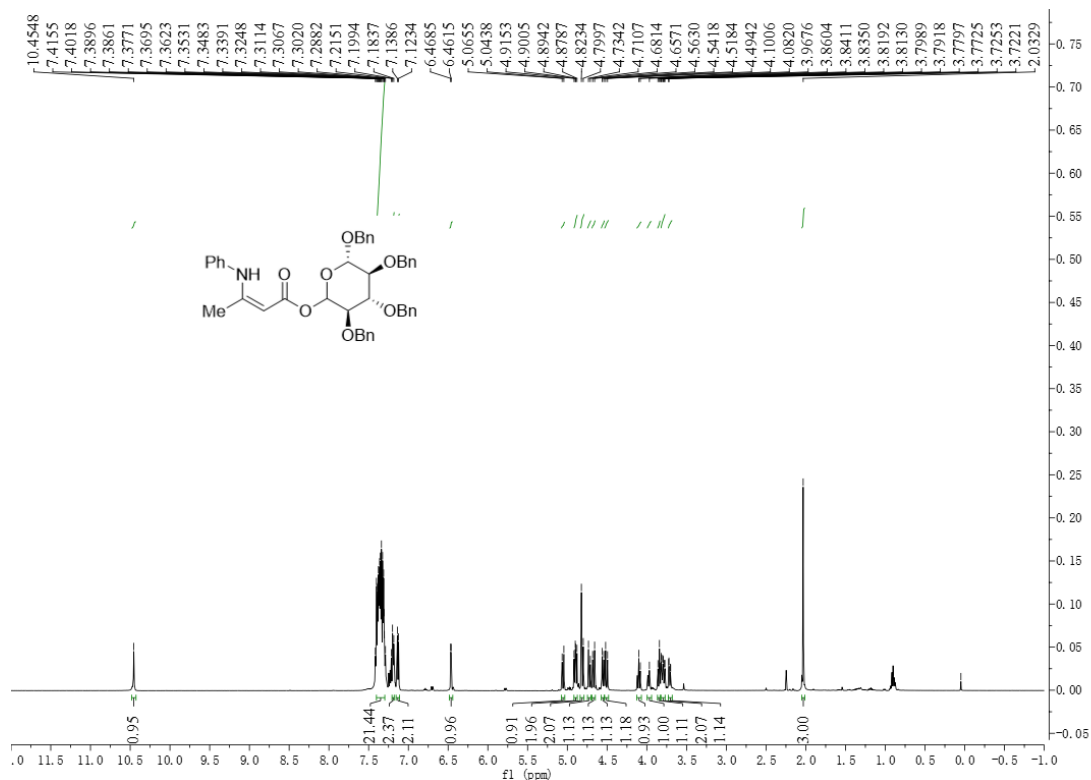

<sup>13</sup>C NMR (125 MHz, CDCl<sub>3</sub>)

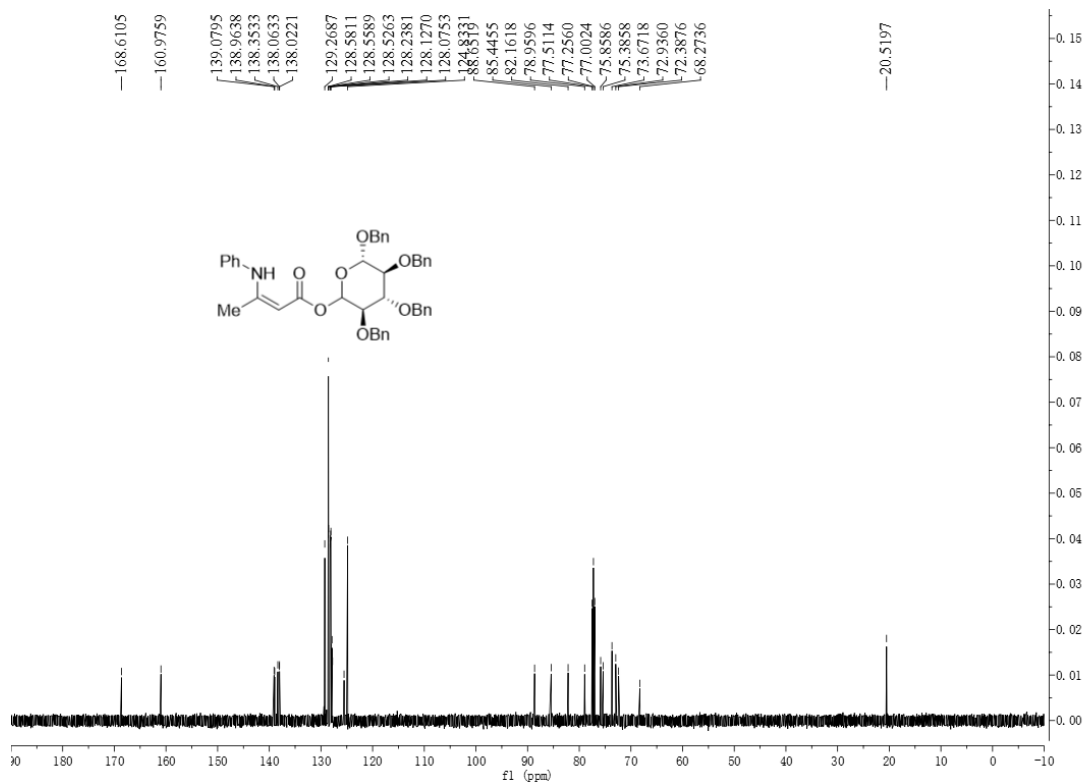

**((2*S*,5*R*)-5-(5-Methyl-2,4-dioxo-3,4-dihydropyrimidin-1(2*H*)-yl)-2,5-dihydrofuran-2-yl)methyl (Z)-3-(phenylamino)but-2-enoate (30)**

<sup>1</sup>H NMR (500 MHz, CDCl<sub>3</sub>)

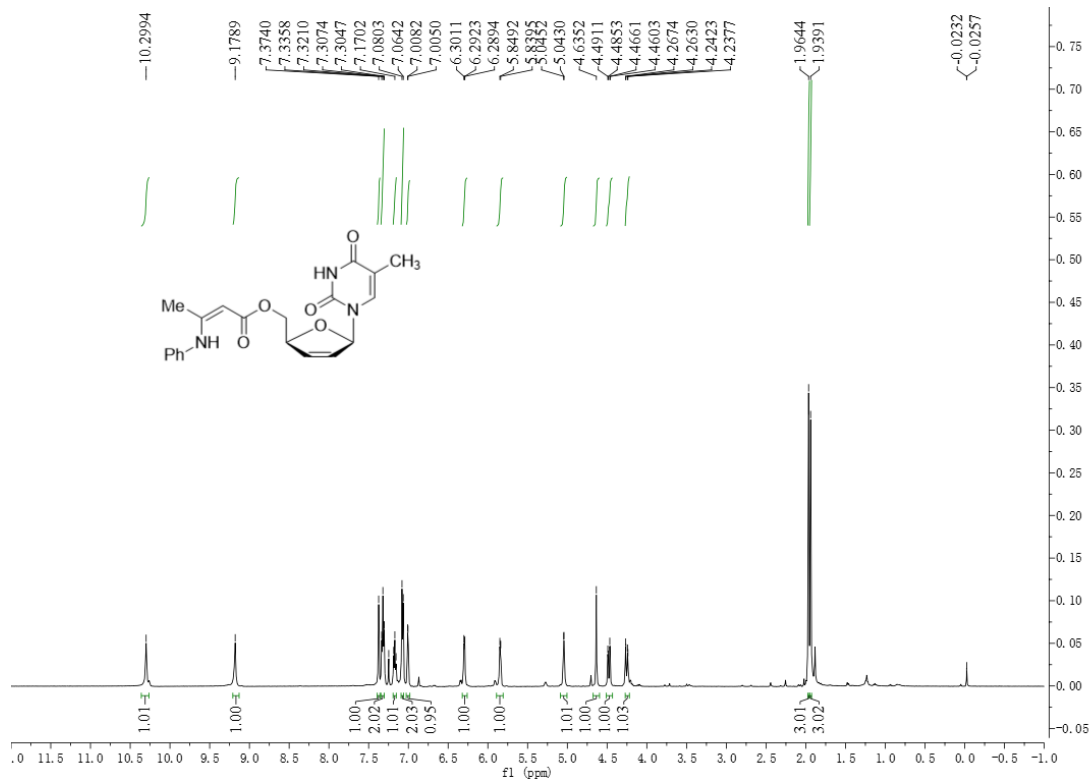

<sup>13</sup>C NMR (125 MHz, CDCl<sub>3</sub>)

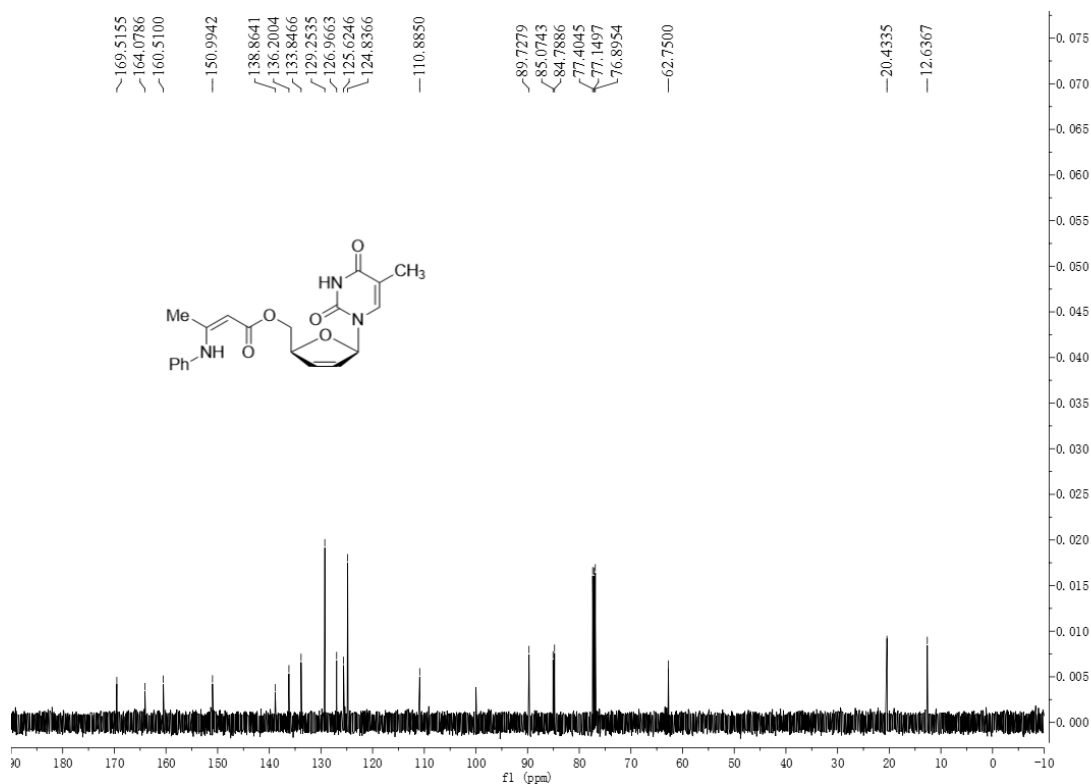

**(5*R*,5*aR*,8*aR*,9*R*)-8-oxo-9-(3,4,5-trimethoxyphenyl)-5,5*a*,6,8,8*a*,9-hexahydrofuro[3',4':6,7]naphtho[2,3-*d*][1,3]dioxol-5-yl (*Z*)-3-(phenylamino)but-2-enoate (31)**

<sup>1</sup>H NMR (500 MHz, CDCl<sub>3</sub>)

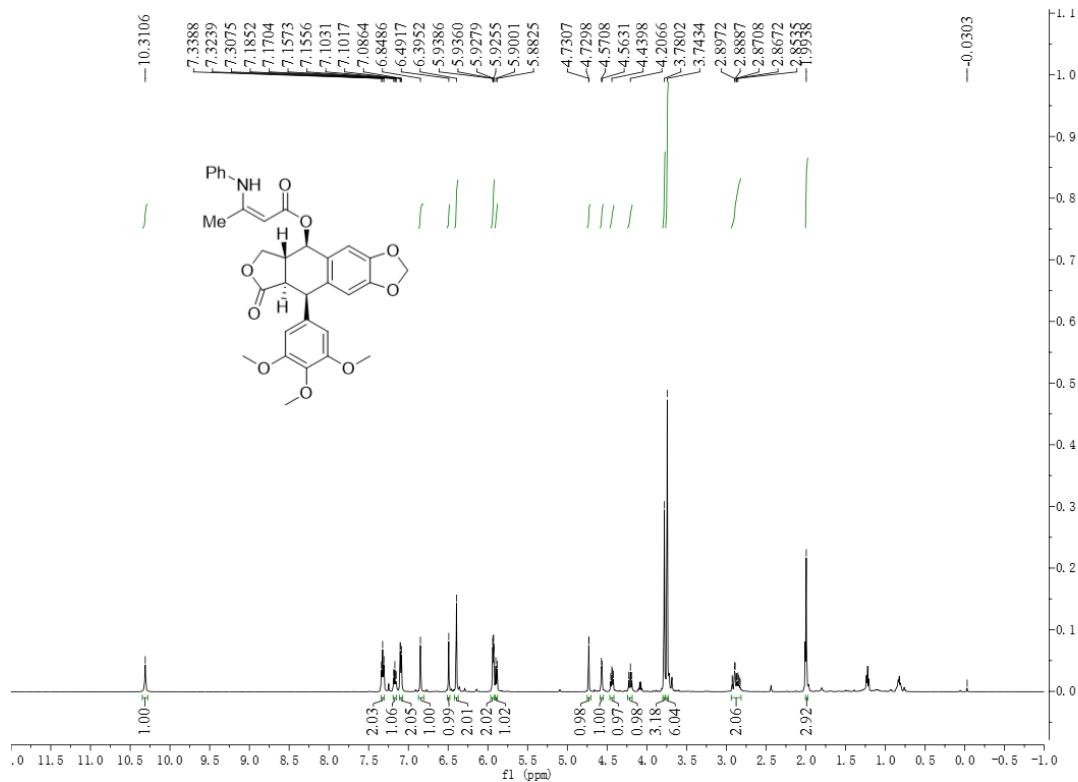

<sup>13</sup>C NMR (125 MHz, CDCl<sub>3</sub>)

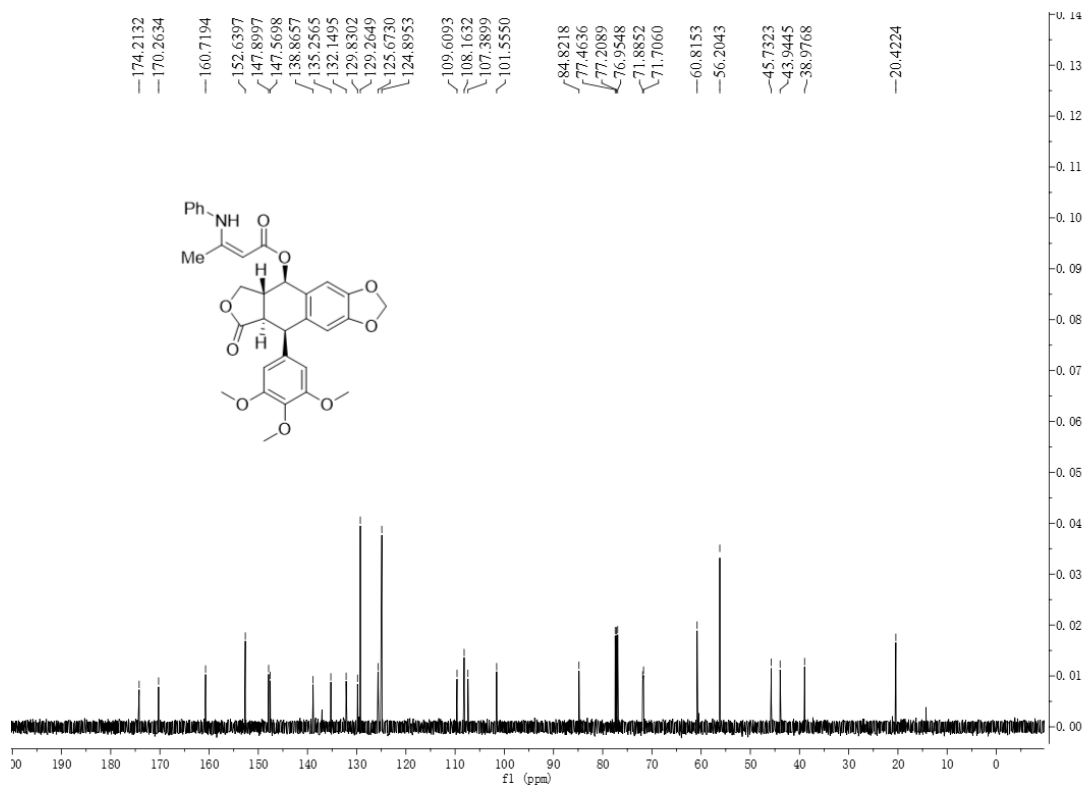



# Ethyl (Z)-3-((2-(1H-indol-3-yl)ethyl)amino)but-2-enoate (32)

<sup>1</sup>H NMR (500 MHz, CDCl<sub>3</sub>)

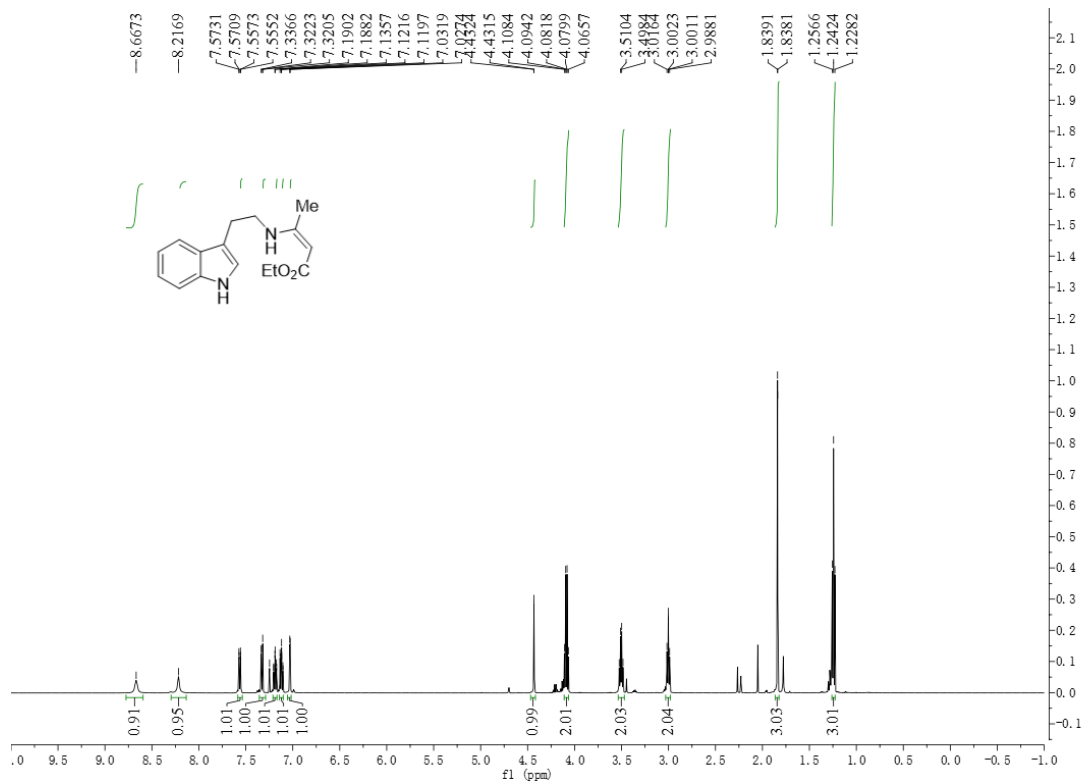

<sup>13</sup>C NMR (125 MHz, CDCl<sub>3</sub>)

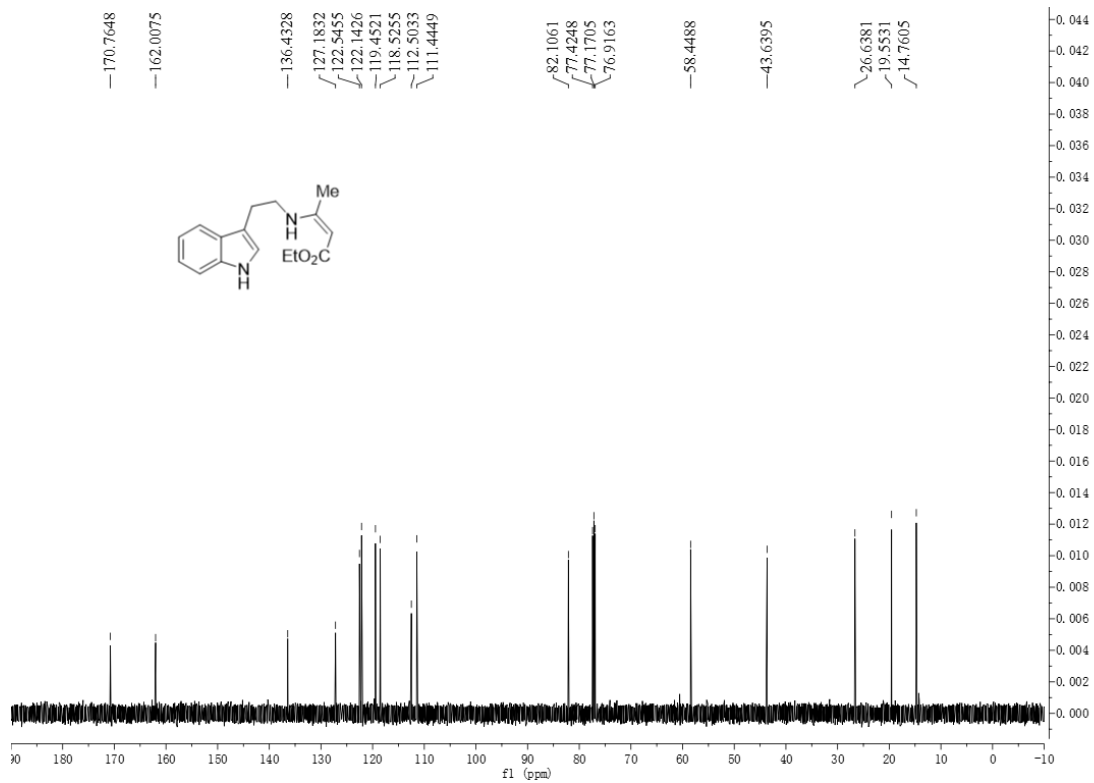

**Ethyl (Z)-3-((2-oxo-4-(trifluoromethyl)-2H-chromen-7-yl)amino)but-2-enoate (33)**

<sup>1</sup>H NMR (500 MHz, CDCl<sub>3</sub>)

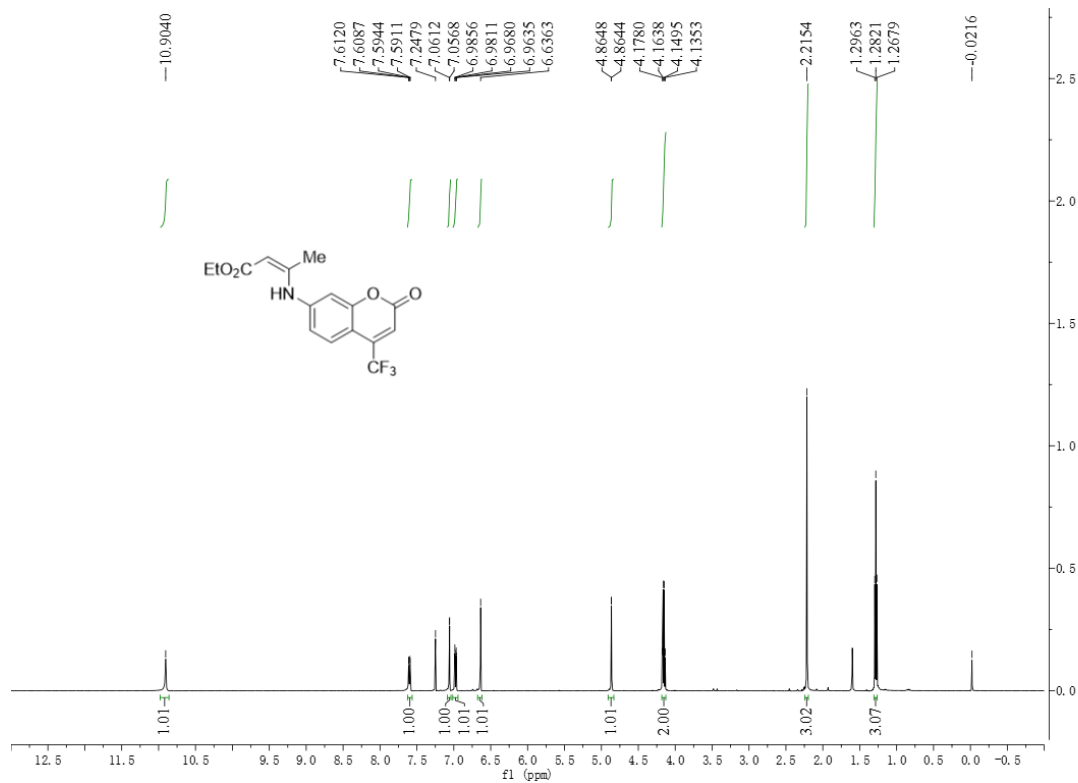

<sup>13</sup>C NMR (125 MHz, CDCl<sub>3</sub>)

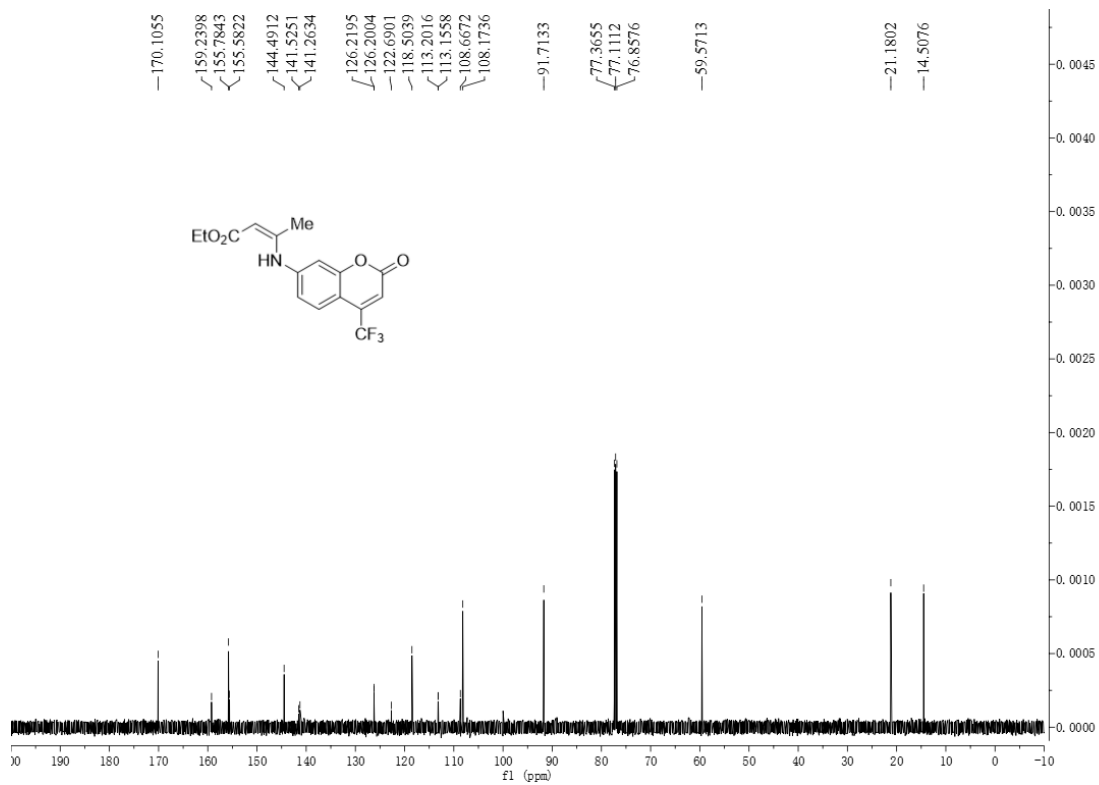

$^{19}\text{F}$  NMR (470 MHz,  $\text{CDCl}_3$ )

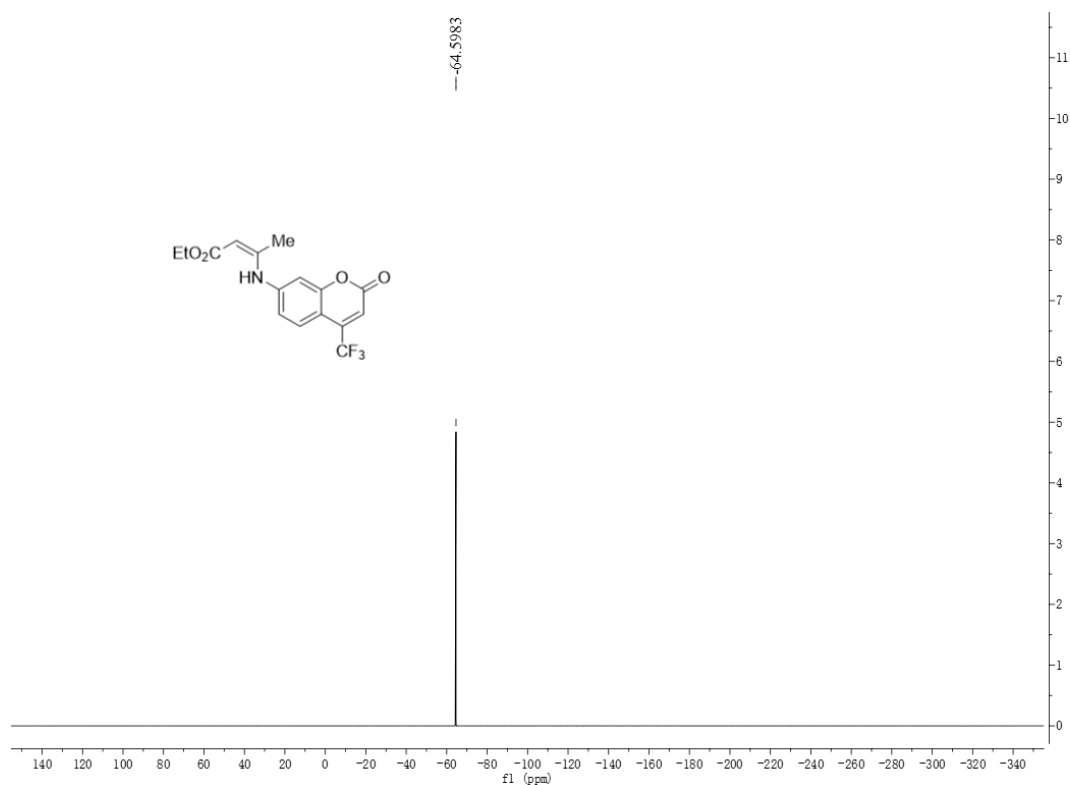

**3-Ethyl 5-methyl (Z)-4-(2-chlorophenyl)-2-((2-((4-ethoxy-4-oxobut-2-en-2-yl)amino)ethoxy)methyl)-6-methyl-1,4-dihydropyridine-3,5-dicarboxylate (34)**

$^1\text{H}$  NMR (500 MHz,  $\text{CDCl}_3$ )

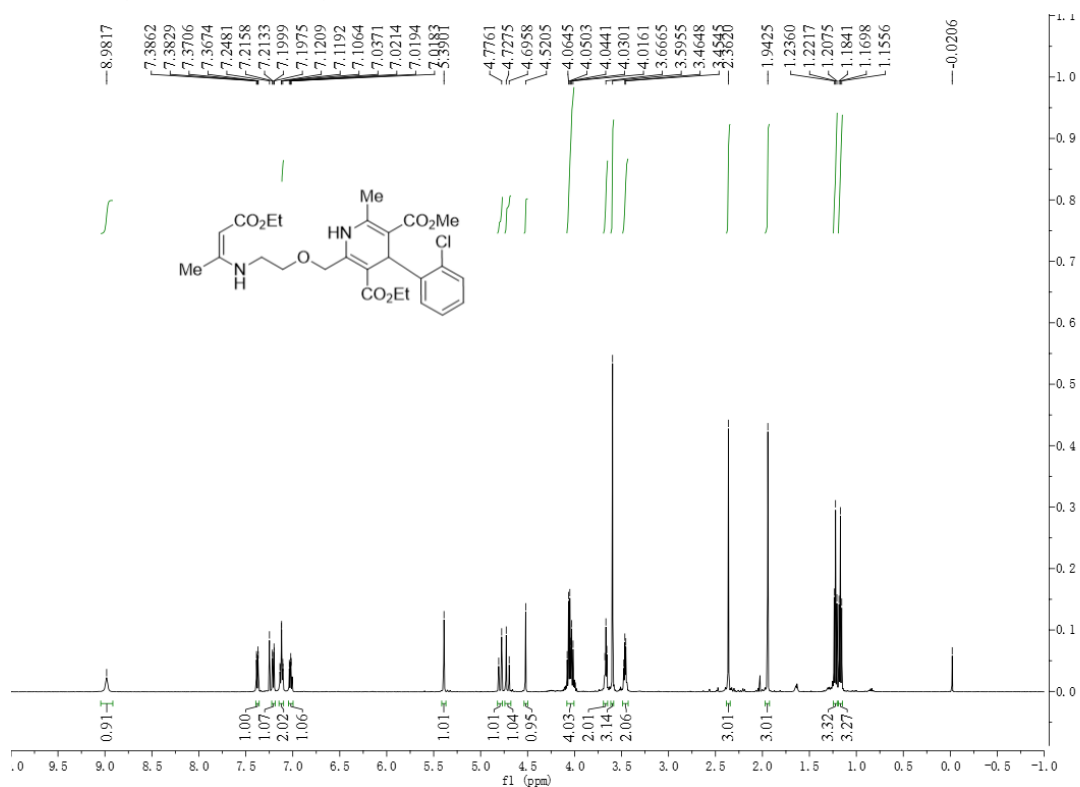

<sup>13</sup>C NMR (125 MHz, CDCl<sub>3</sub>)

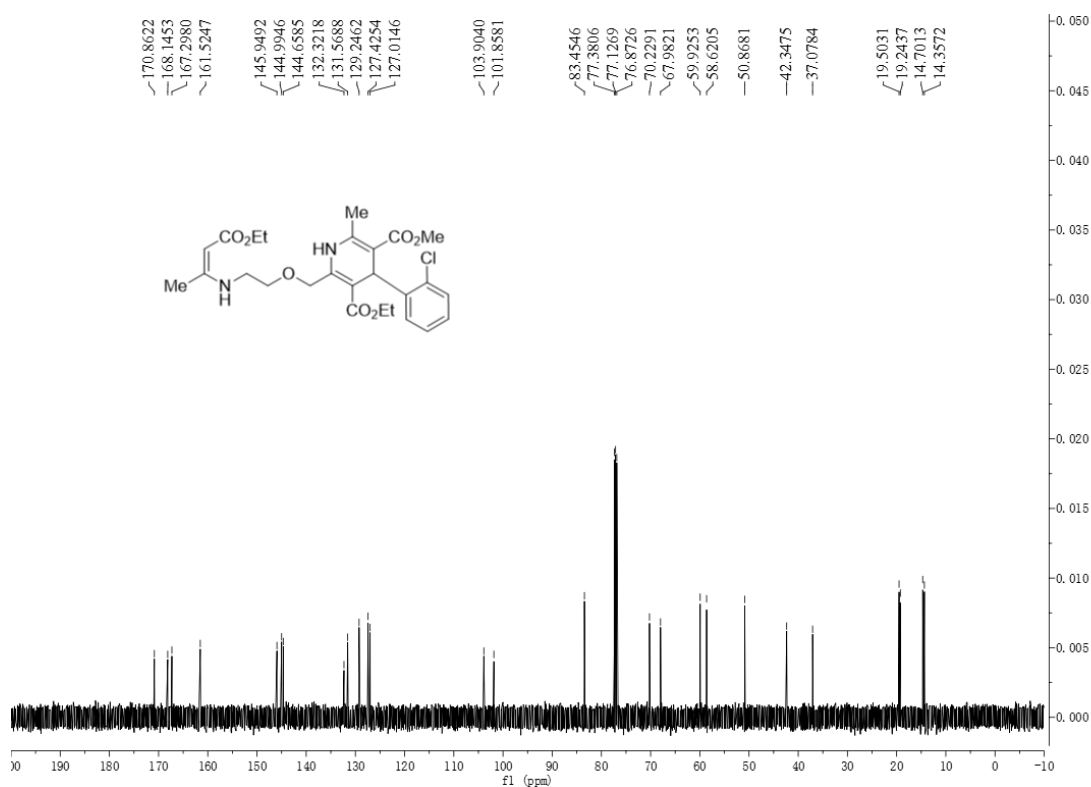

Diethyl 2-(hydroxymethyl)-1,5-diphenyl-1H-pyrrole-3,4-dicarboxylate (4aa)

<sup>1</sup>H NMR (500 MHz, CDCl<sub>3</sub>)

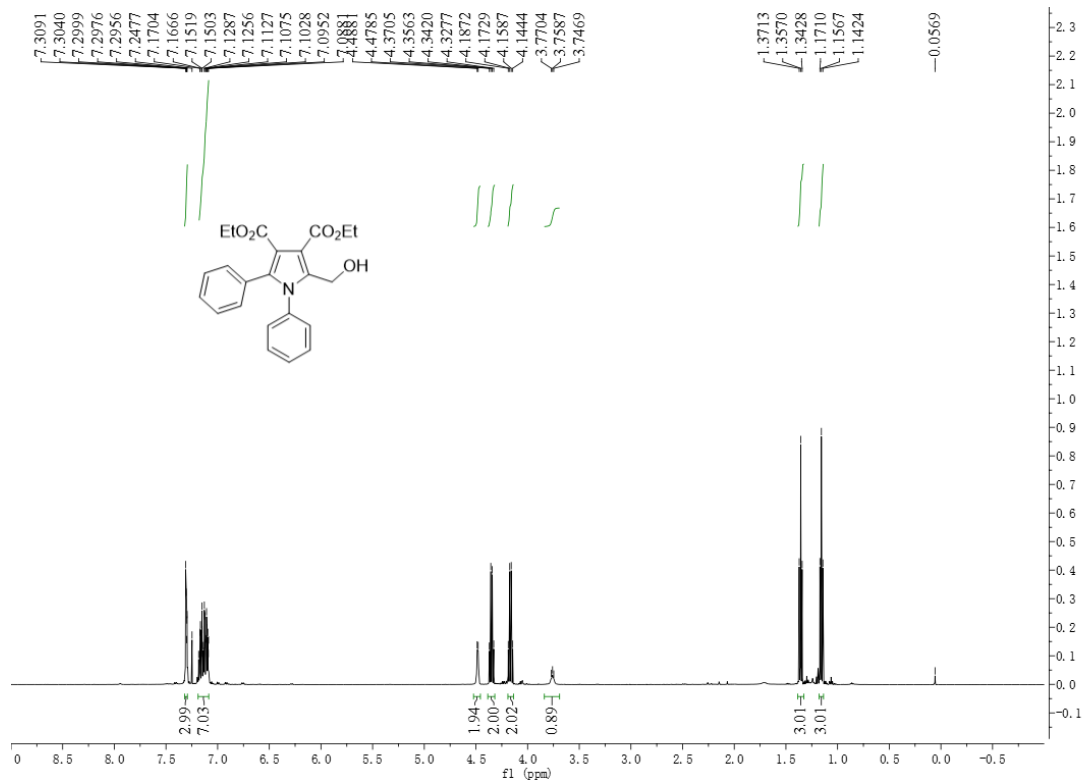

<sup>13</sup>C NMR (125 MHz, CDCl<sub>3</sub>)

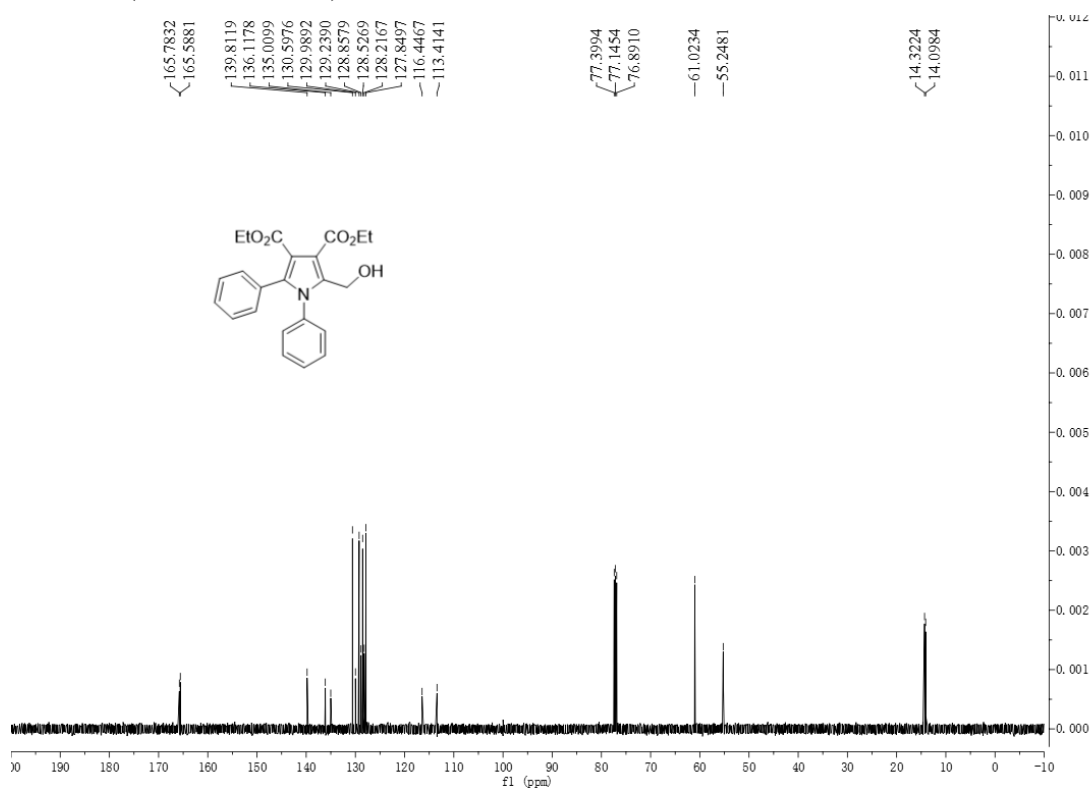

Diethyl 2-(4-fluorophenyl)-5-(hydroxymethyl)-1-phenyl-1H-pyrrole-3,4-dicarboxylate (4ba)

<sup>1</sup>H NMR (500 MHz, CDCl<sub>3</sub>)

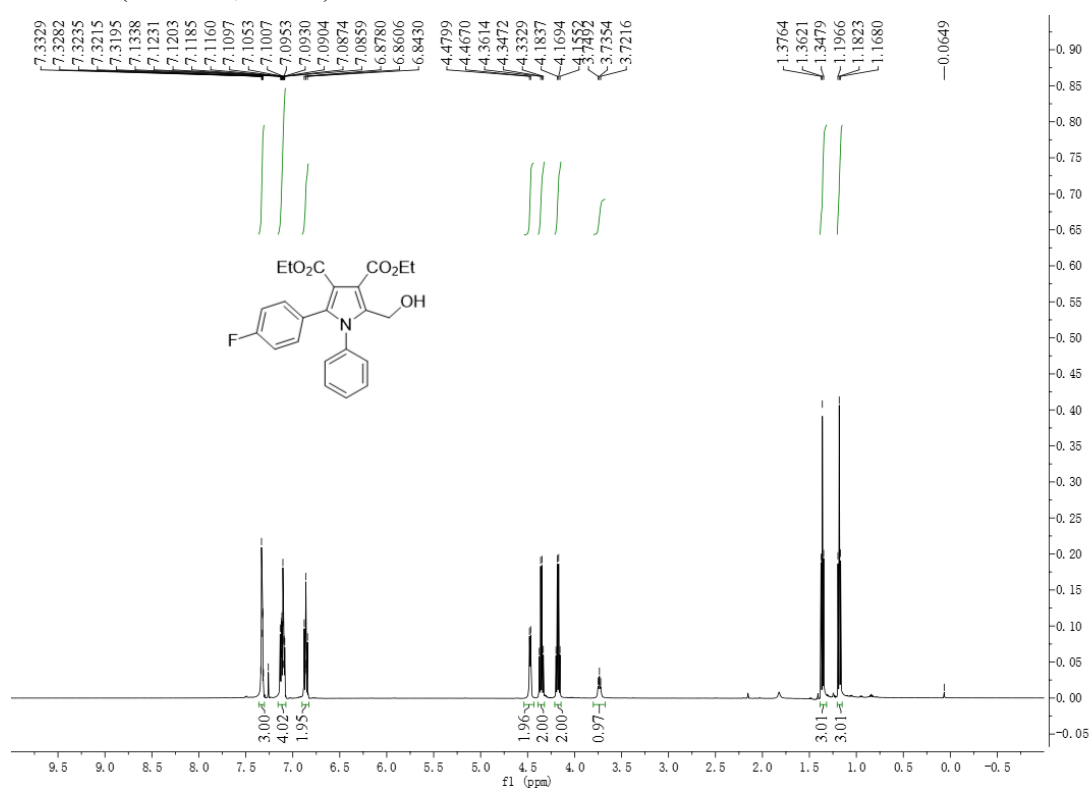

<sup>13</sup>C NMR (125 MHz, CDCl<sub>3</sub>)

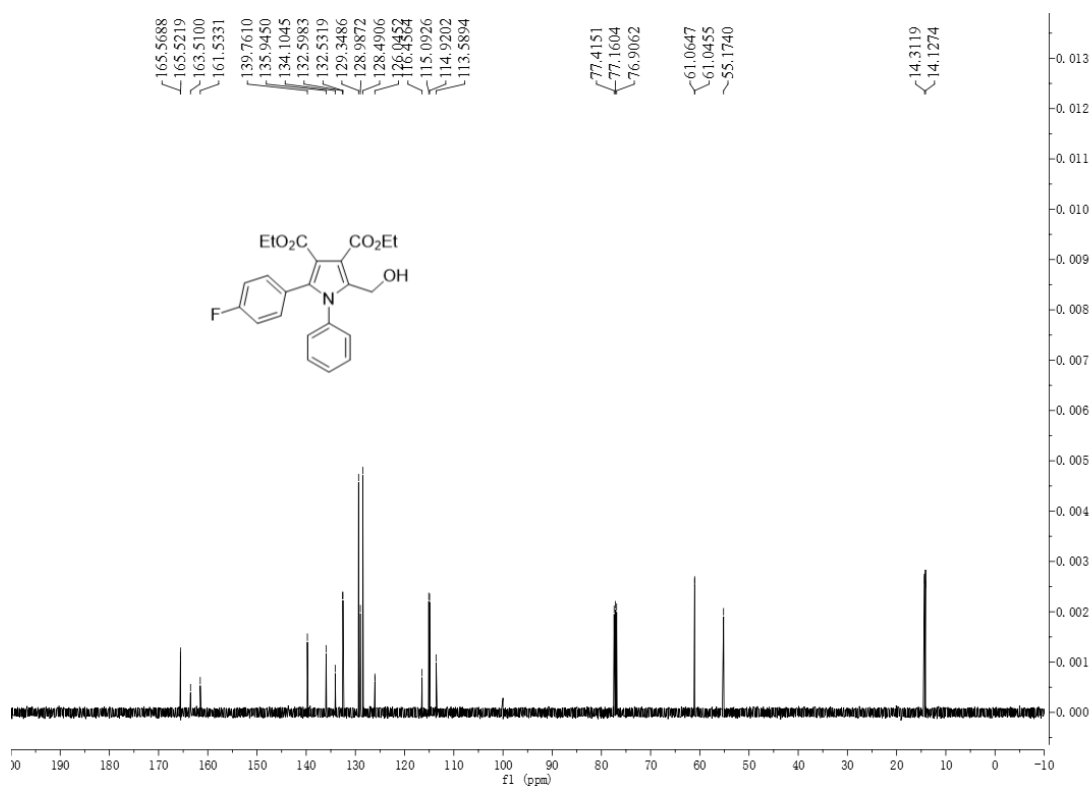

<sup>19</sup>F NMR (470 MHz, CDCl<sub>3</sub>)

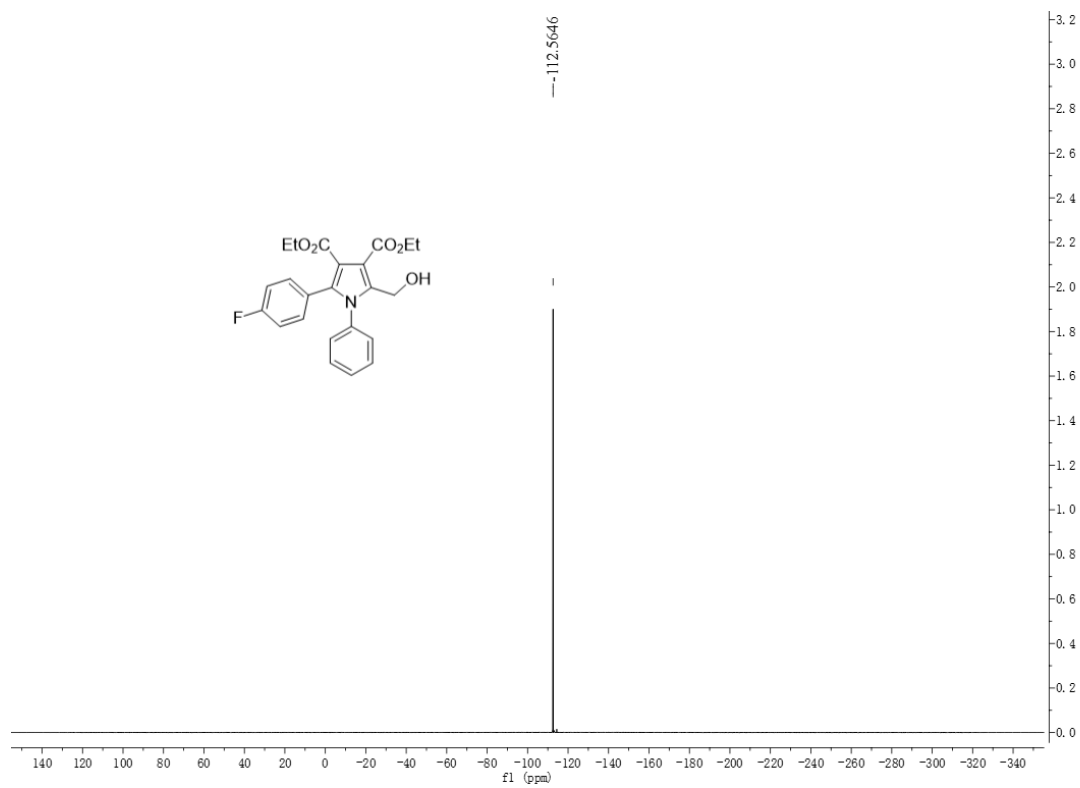

# Diethyl 2-(4-chlorophenyl)-5-(hydroxymethyl)-1-phenyl-1H-pyrrole-3,4-dicarboxylate (4ca)

<sup>1</sup>H NMR (500 MHz, CDCl<sub>3</sub>)

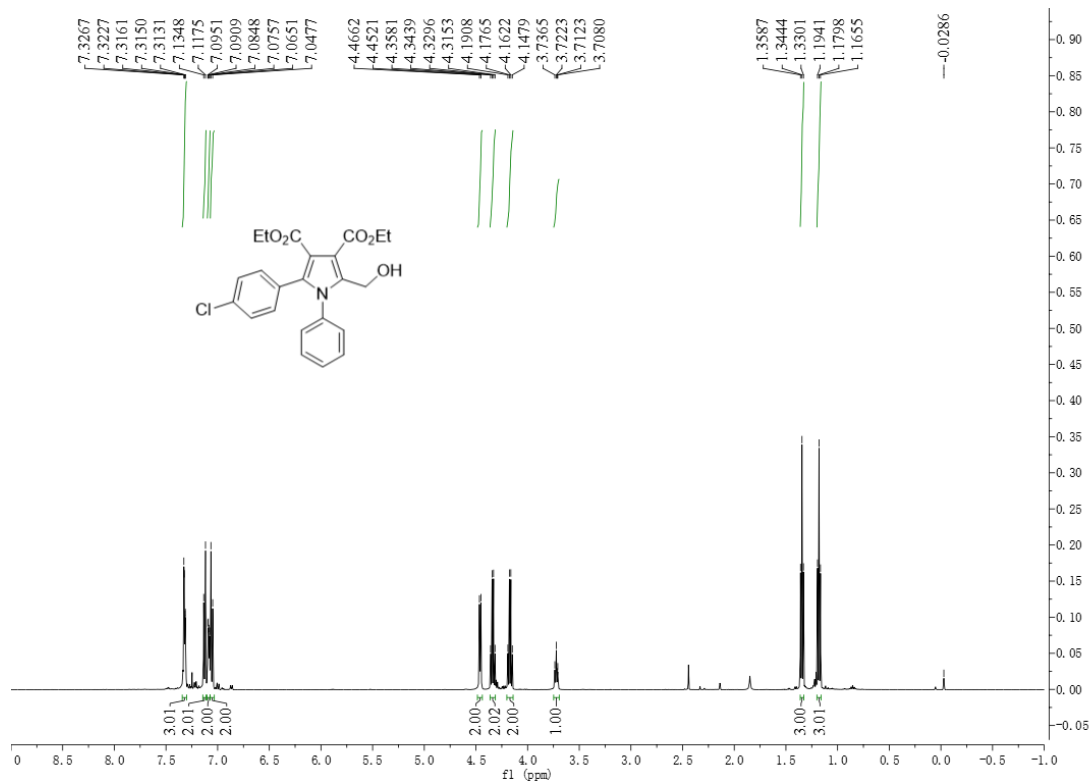

<sup>13</sup>C NMR (125 MHz, CDCl<sub>3</sub>)

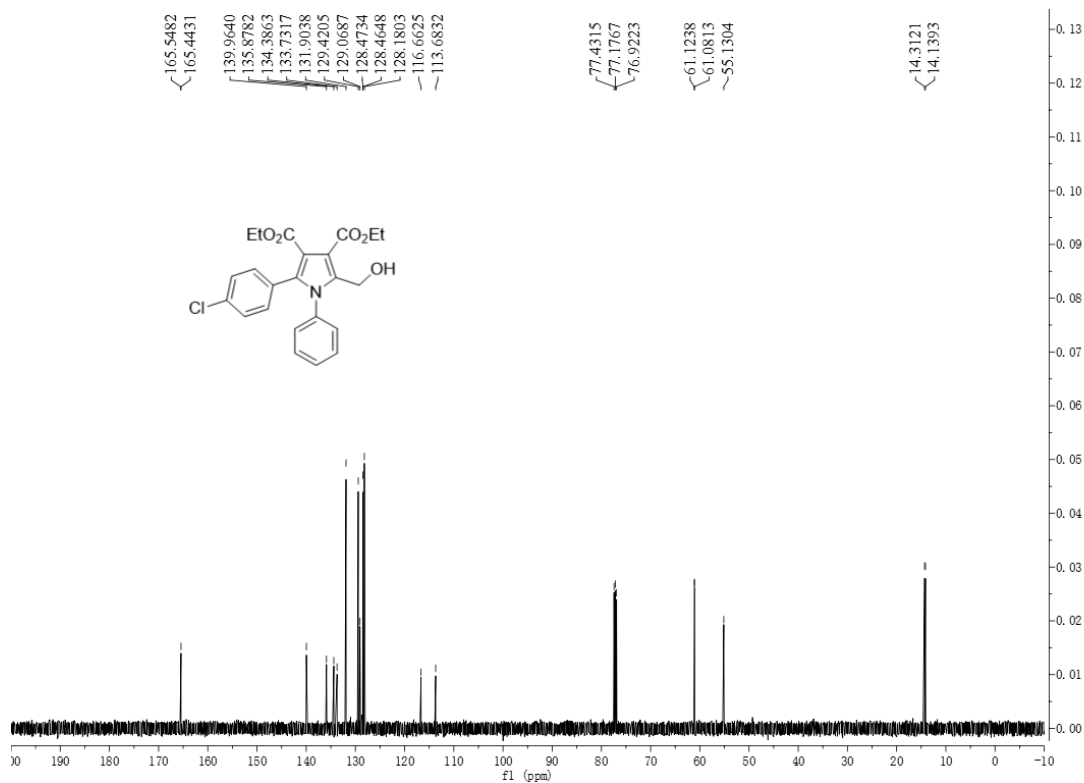

**Diethyl 2-(4-bromophenyl)-5-(hydroxymethyl)-1-phenyl-1H-pyrrole-3,4-dicarboxylate (4da)**

<sup>1</sup>H NMR (500 MHz, CDCl<sub>3</sub>)

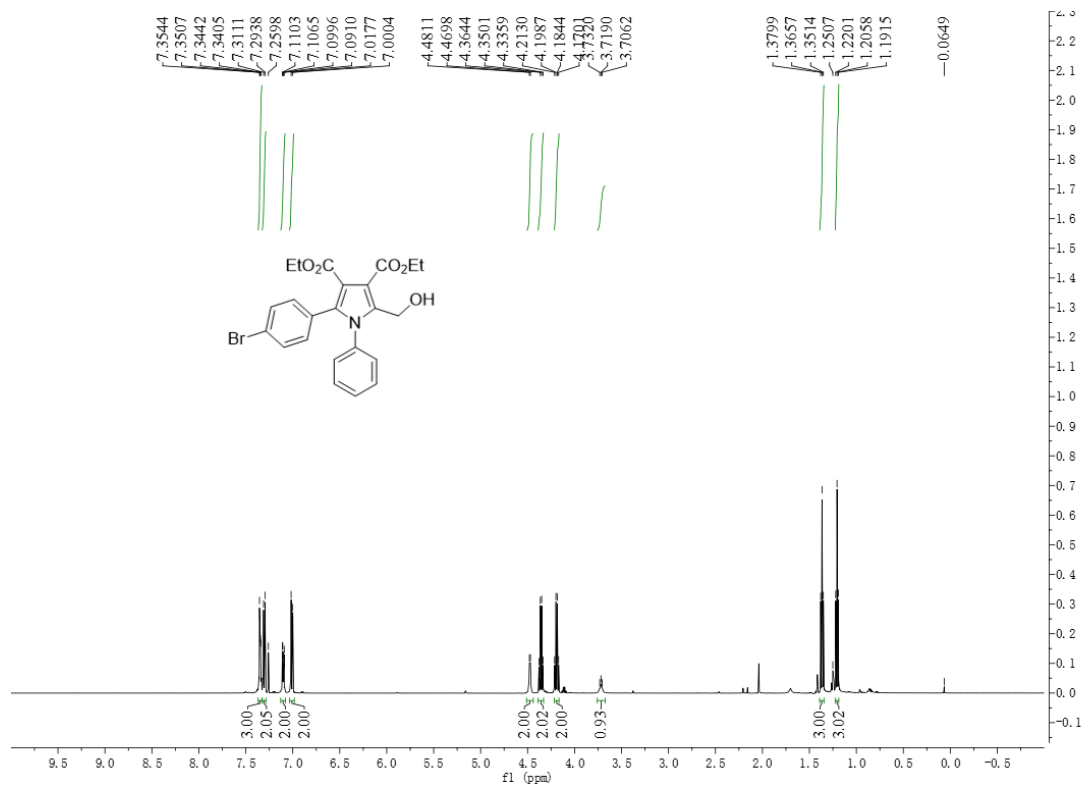

<sup>13</sup>C NMR (125 MHz, CDCl<sub>3</sub>)

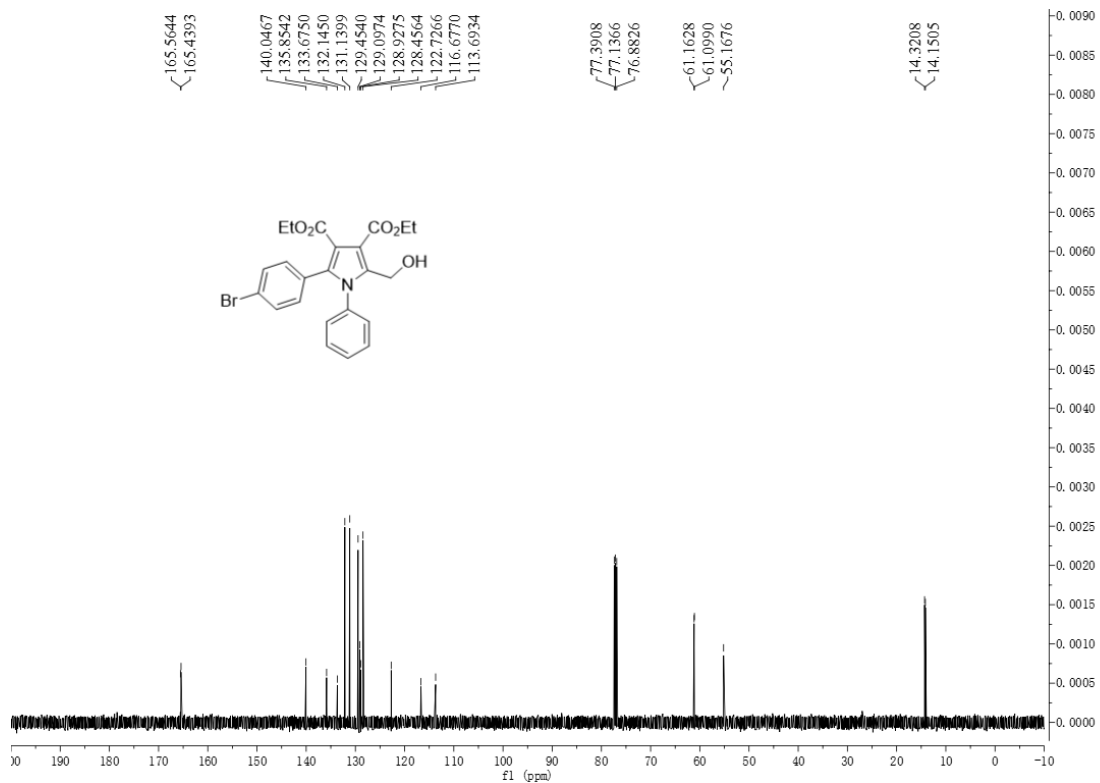



**Diethyl 2-(hydroxymethyl)-1-phenyl-5-(p-tolyl)-1H-pyrrole-3,4-dicarboxylate (4ea)**

<sup>1</sup>H NMR (500 MHz, CDCl<sub>3</sub>)

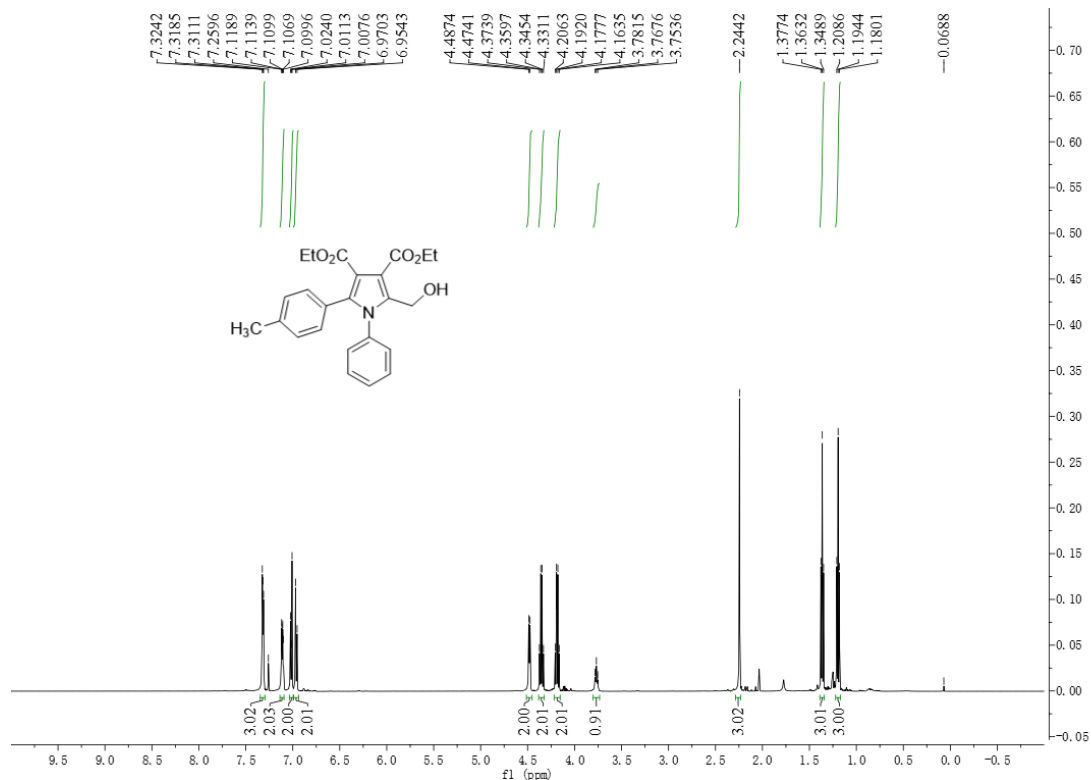

<sup>13</sup>C NMR (125 MHz, CDCl<sub>3</sub>)

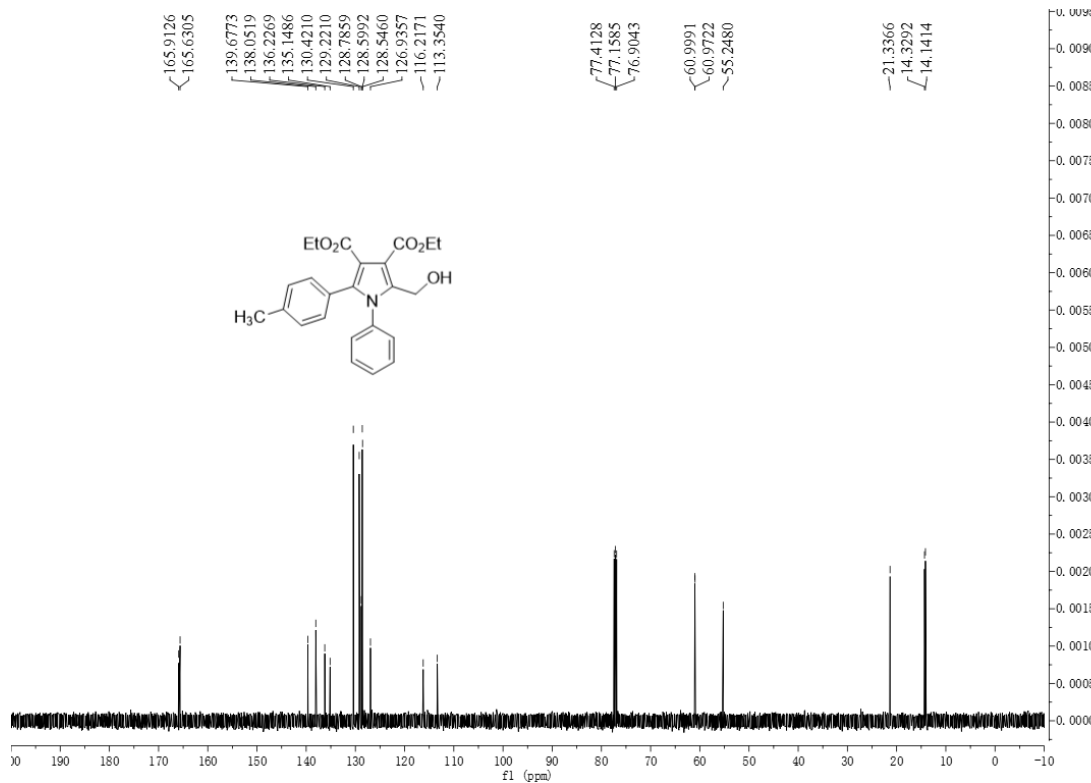

# Diethyl 2-(hydroxymethyl)-5-(4-methoxyphenyl)-1-phenyl-1H-pyrrole-3,4-dicarboxylate (4fa)

$^1\text{H}$  NMR (500 MHz,  $\text{CDCl}_3$ )

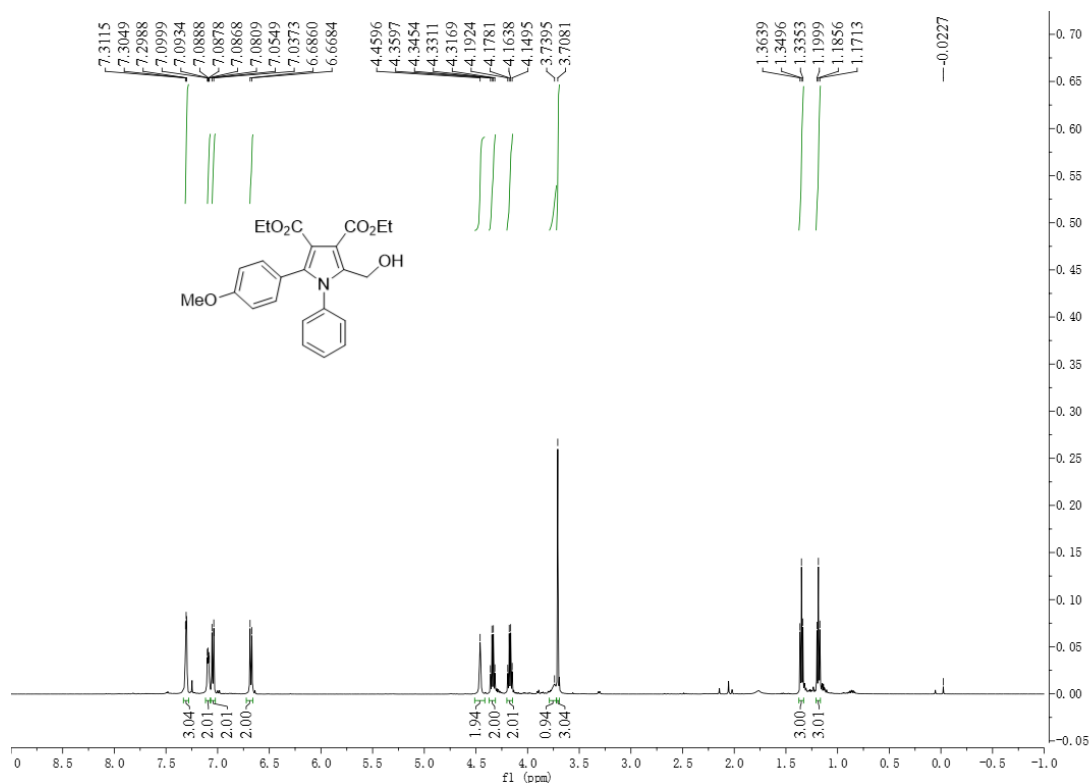

$^{13}\text{C}$  NMR (125 MHz,  $\text{CDCl}_3$ )

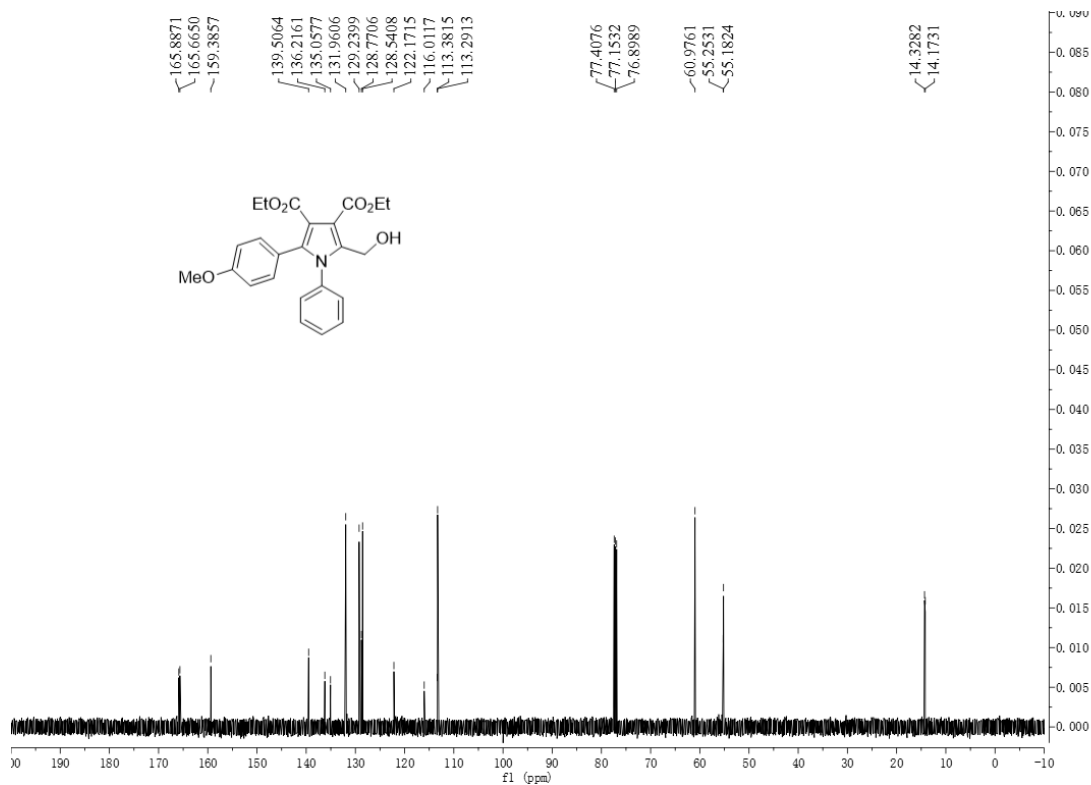

# Diethyl 2-(2-bromophenyl)-5-(hydroxymethyl)-1-phenyl-1H-pyrrole-3,4-dicarboxylate (4ga)

<sup>1</sup>H NMR (500 MHz, CDCl<sub>3</sub>)

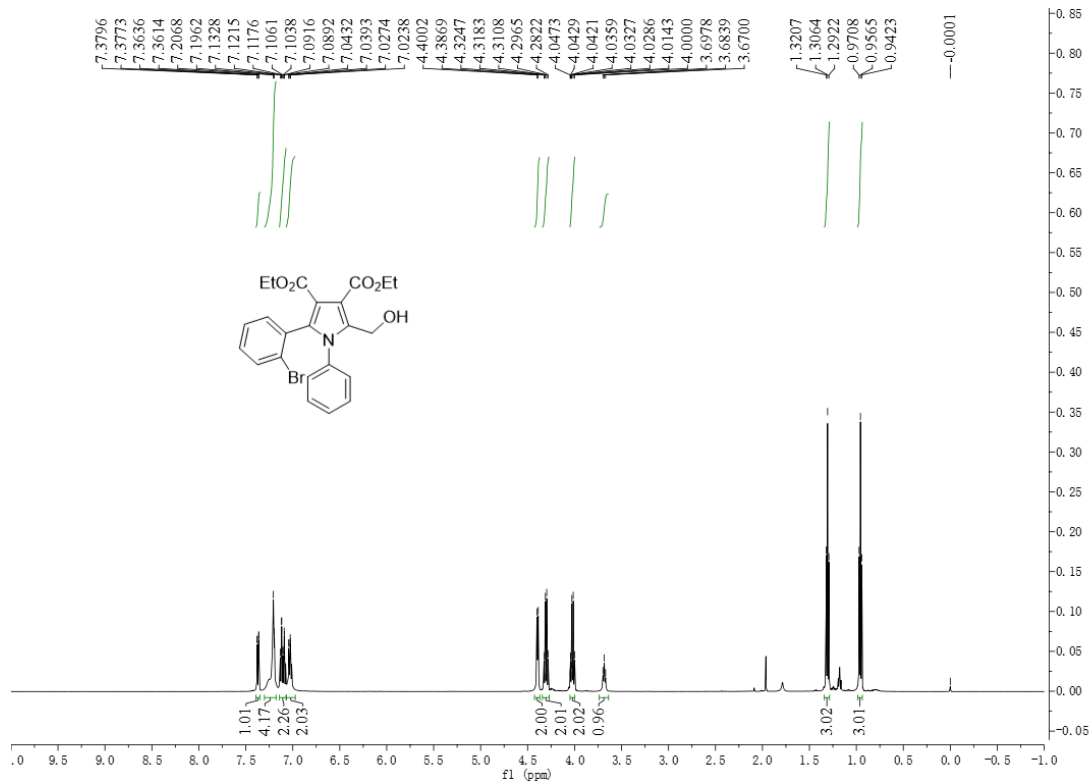

<sup>13</sup>C NMR (125 MHz, CDCl<sub>3</sub>)

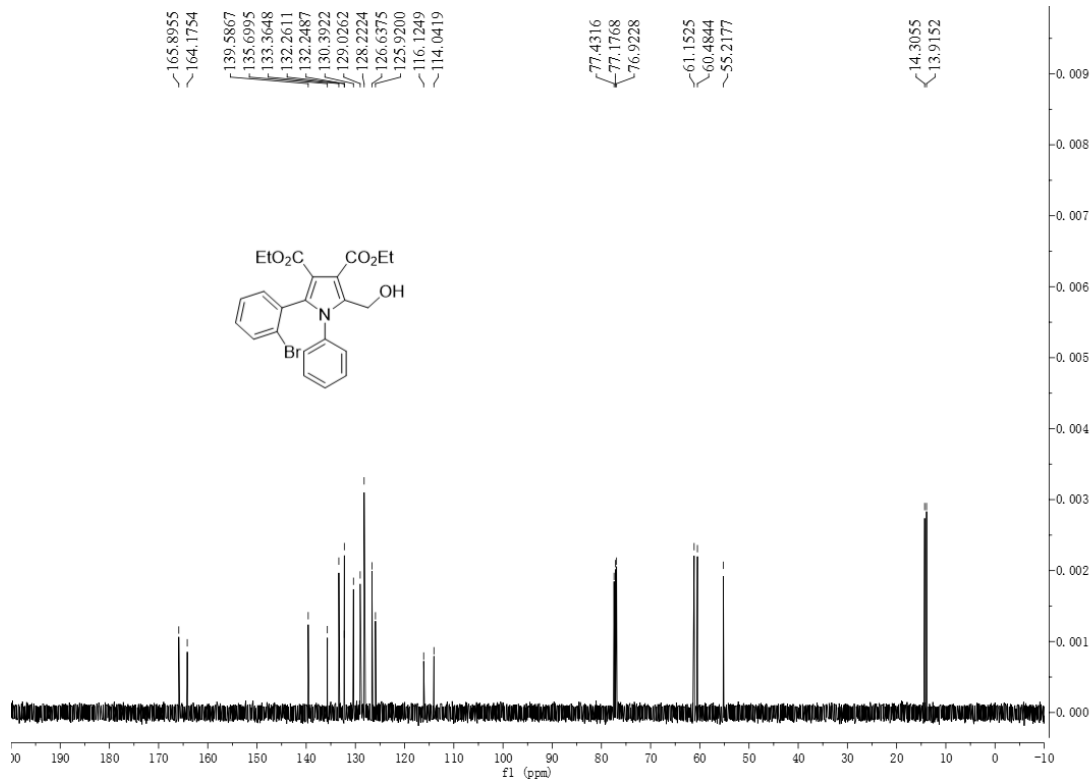

**Diethyl 2-(3-bromophenyl)-5-(hydroxymethyl)-1-phenyl-1H-pyrrole-3,4-dicarboxylate (4ha)**

<sup>1</sup>H NMR (500 MHz, CDCl<sub>3</sub>)

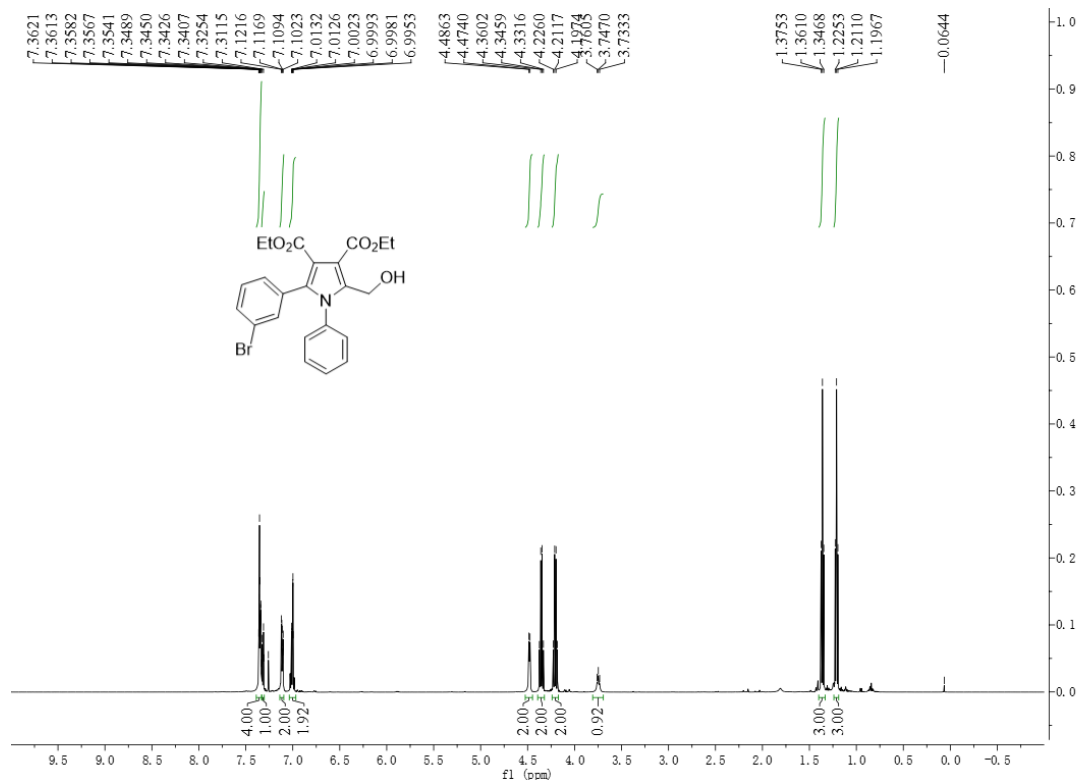

<sup>13</sup>C NMR (125 MHz, CDCl<sub>3</sub>)

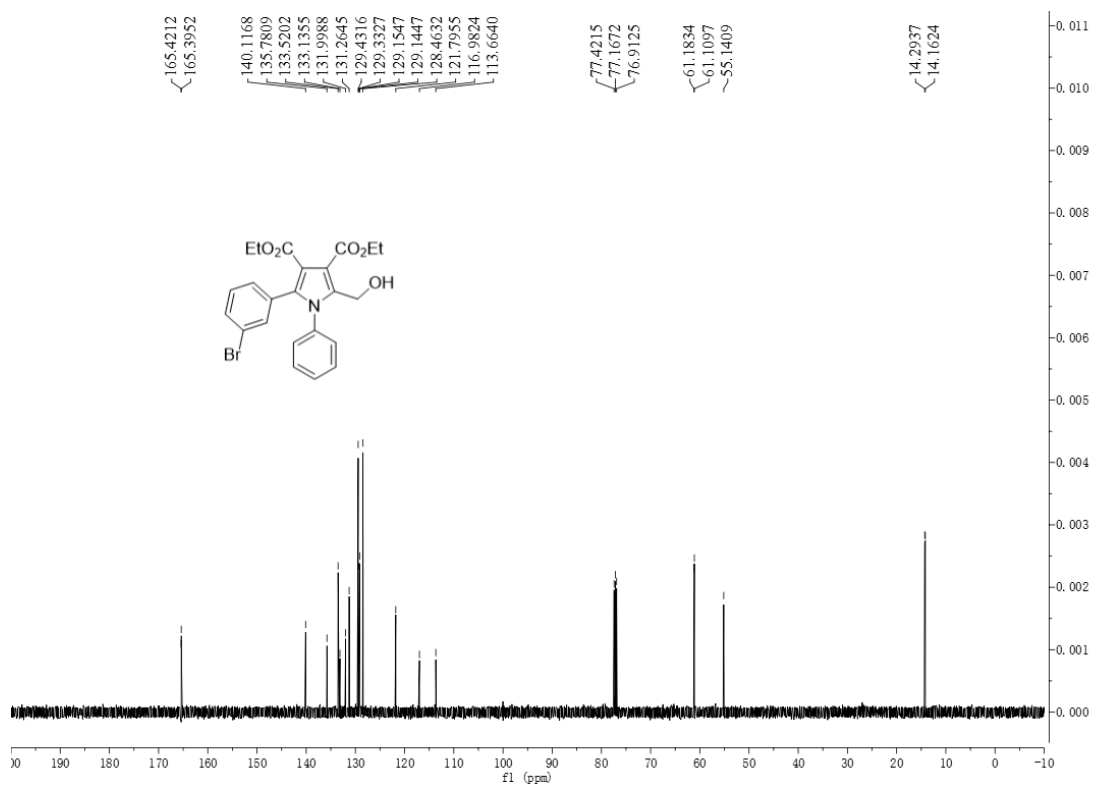

**Diethyl 2-(hydroxymethyl)-5-(3-methoxyphenyl)-1-phenyl-1H-pyrrole-3,4-dicarboxylate (4ia)**

<sup>1</sup>H NMR (500 MHz, CDCl<sub>3</sub>)

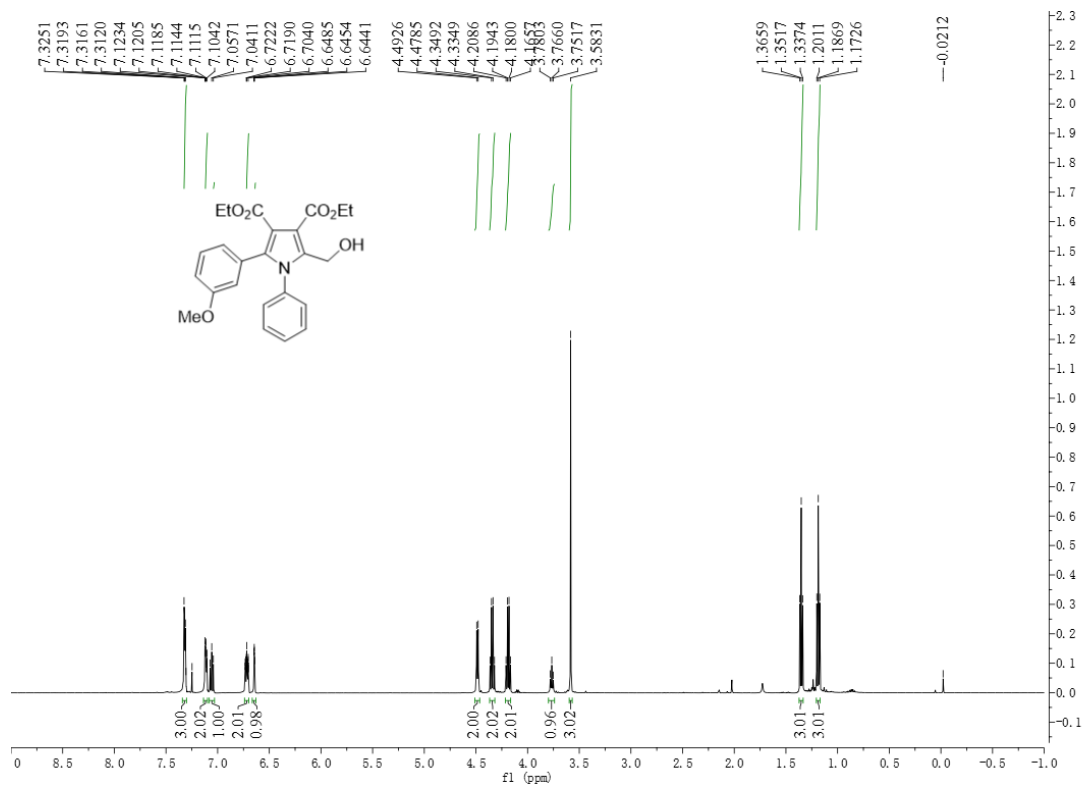

<sup>13</sup>C NMR (125 MHz, CDCl<sub>3</sub>)

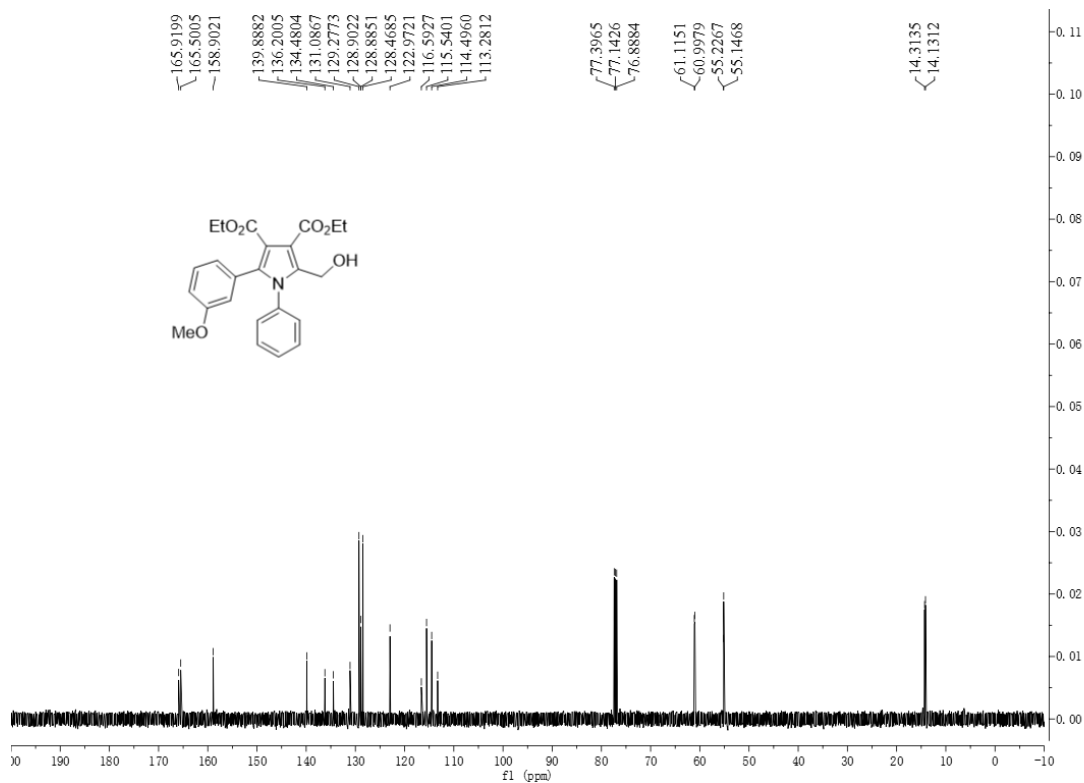

**Diethyl 2-(hydroxymethyl)-1-phenyl-5-(3-(trifluoromethyl)phenyl)-1H-pyrrole-3,4-dicarboxylate (4ja)**

<sup>1</sup>H NMR (500 MHz, CDCl<sub>3</sub>)

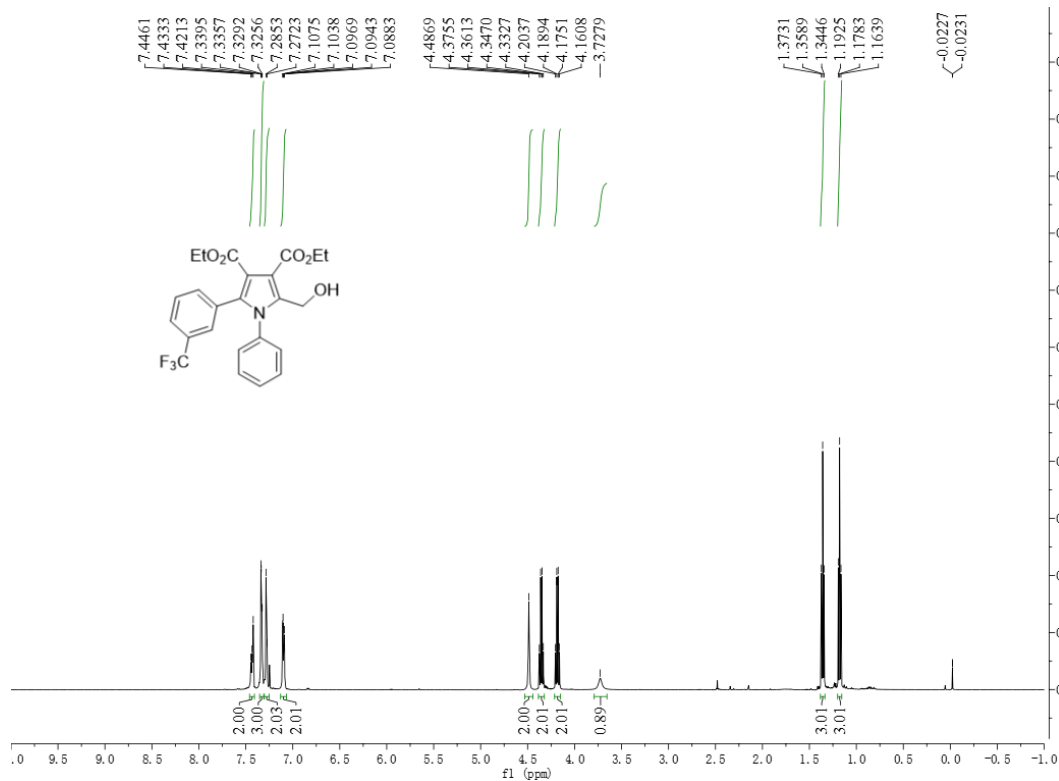

<sup>13</sup>C NMR (125 MHz, CDCl<sub>3</sub>)

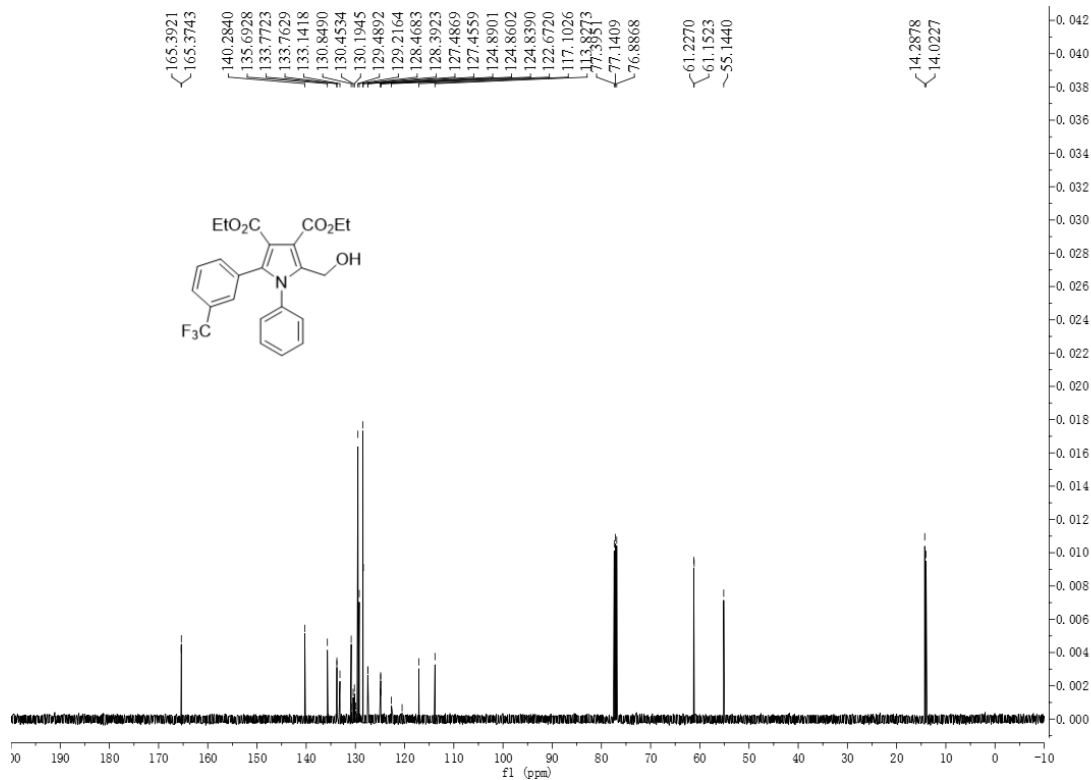

$^{19}\text{F}$  NMR (470 MHz,  $\text{CDCl}_3$ )

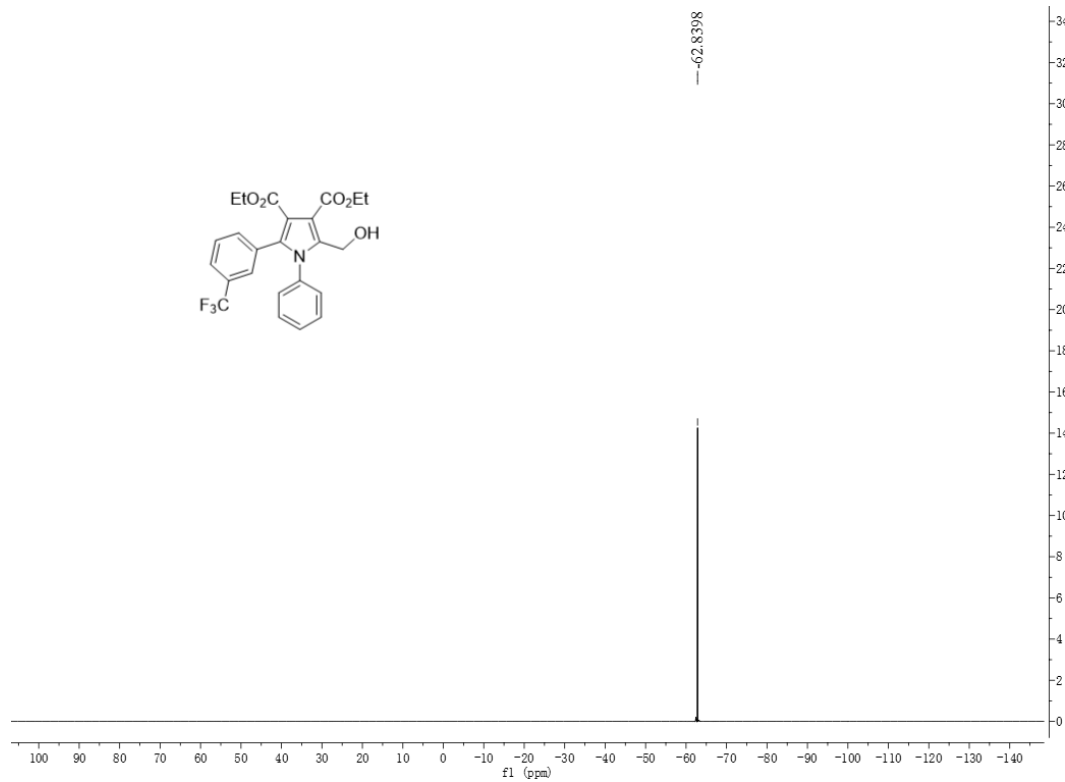

**Diethyl 2-(hydroxymethyl)-5-(naphthalen-2-yl)-1-phenyl-1H-pyrrole-3,4-dicarboxylate (4ka)**

$^1\text{H}$  NMR (500 MHz,  $\text{CDCl}_3$ )

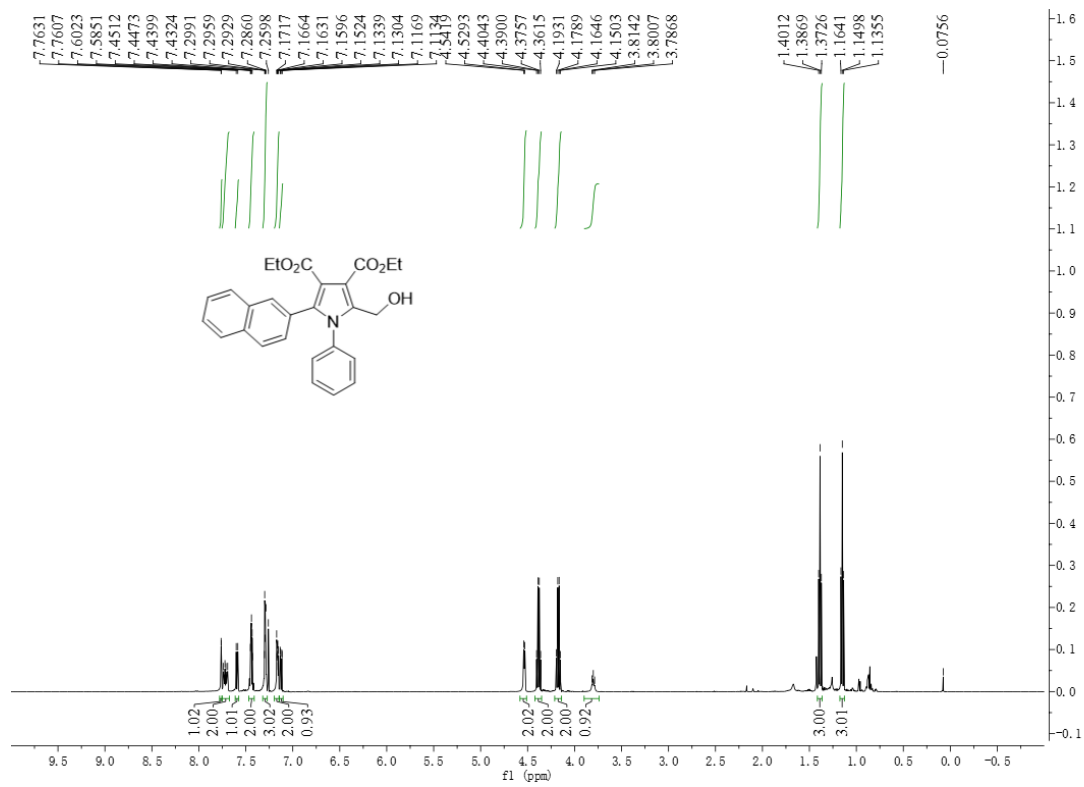

<sup>13</sup>C NMR (125 MHz, CDCl<sub>3</sub>)

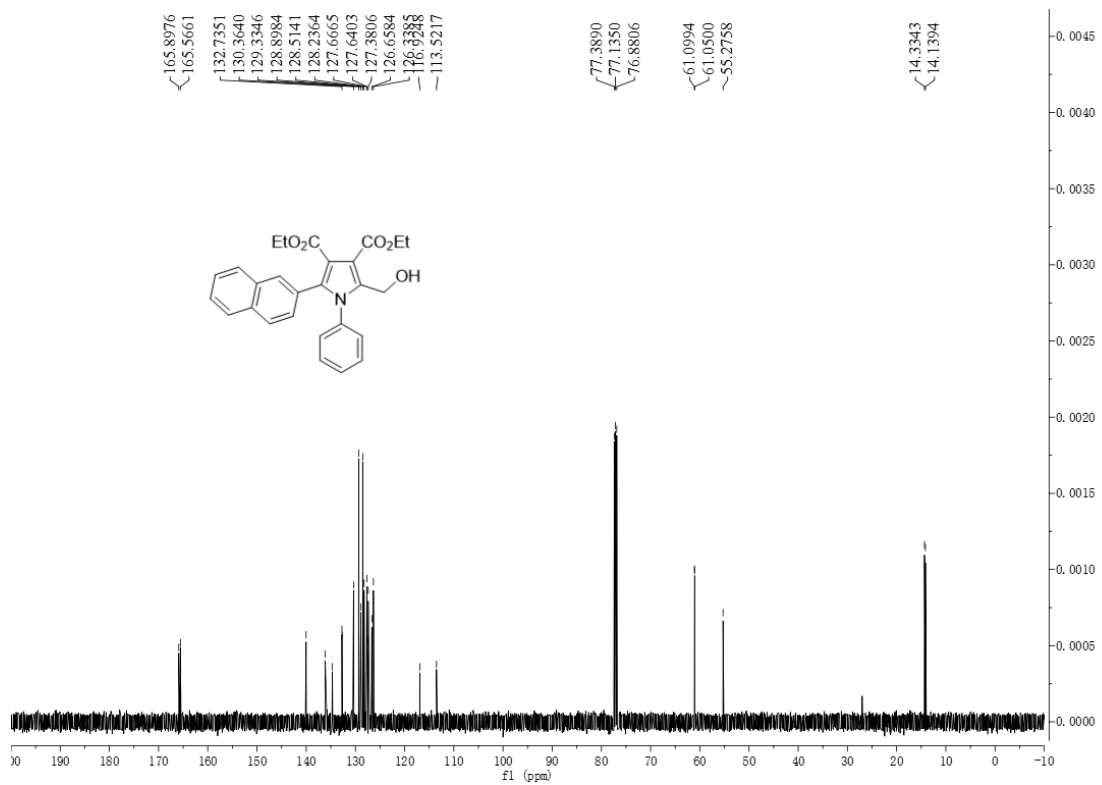

Diethyl 2-(hydroxymethyl)-5-(naphthalen-1-yl)-1-phenyl-1H-pyrrole-3,4-dicarboxylate (4la)

<sup>1</sup>H NMR (500 MHz, CDCl<sub>3</sub>)

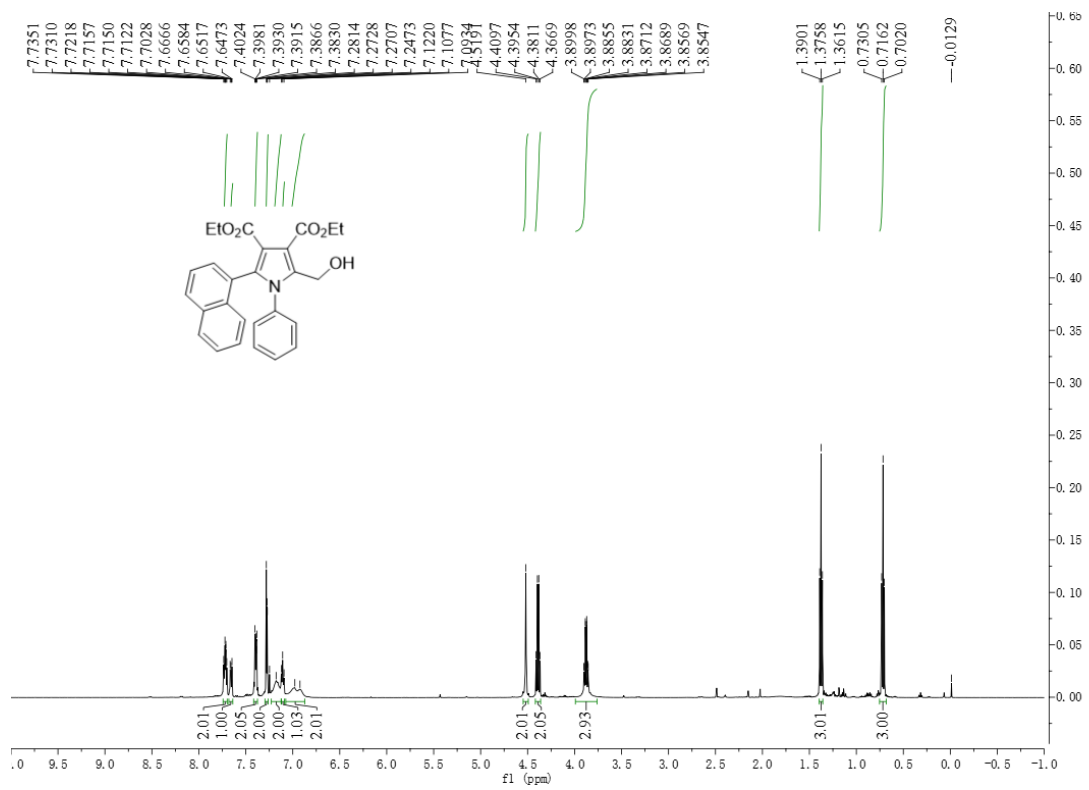



<sup>13</sup>C NMR (125 MHz, CDCl<sub>3</sub>)

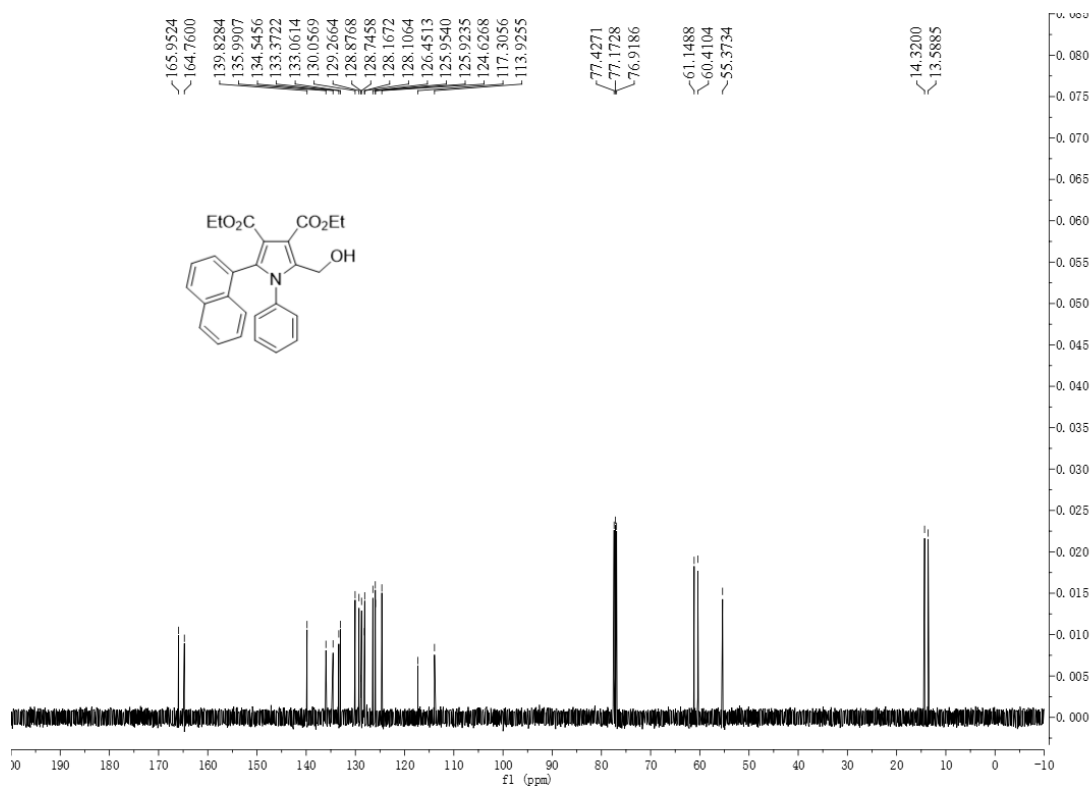

**Ethyl 4-benzoyl-2-(hydroxymethyl)-1,5-diphenyl-1H-pyrrole-3-carboxylate (4ma)**

<sup>1</sup>H NMR (500 MHz, CDCl<sub>3</sub>)

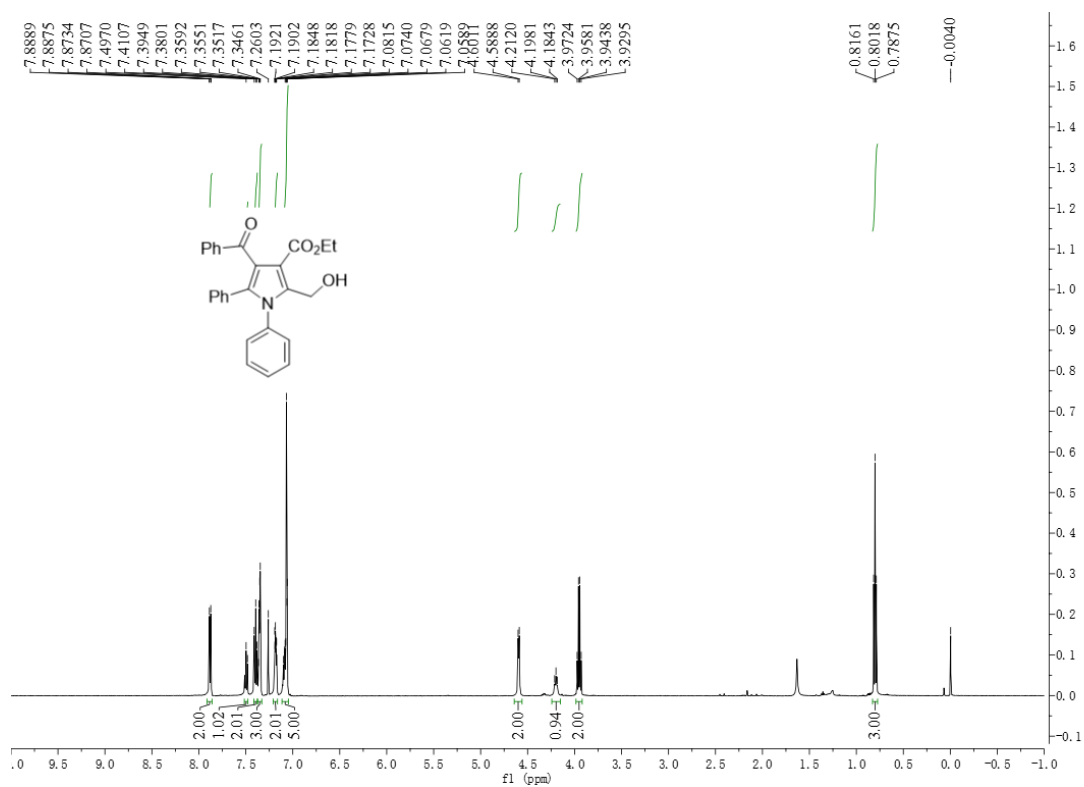

$^{13}\text{C}$  NMR (125 MHz,  $\text{CDCl}_3$ )

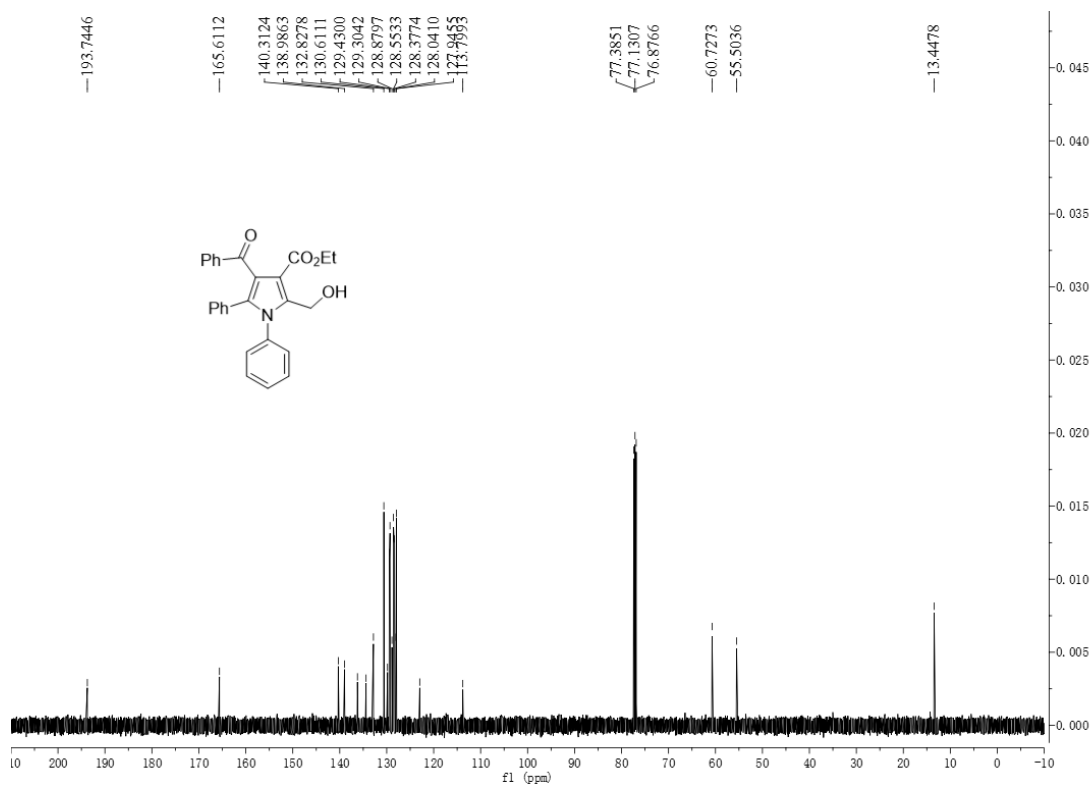

Diethyl 2-(4-fluorophenyl)-5-(hydroxymethyl)-1-phenyl-1H-pyrrole-3,4-dicarboxylate (4ab)

$^1\text{H}$  NMR (500 MHz,  $\text{CDCl}_3$ )

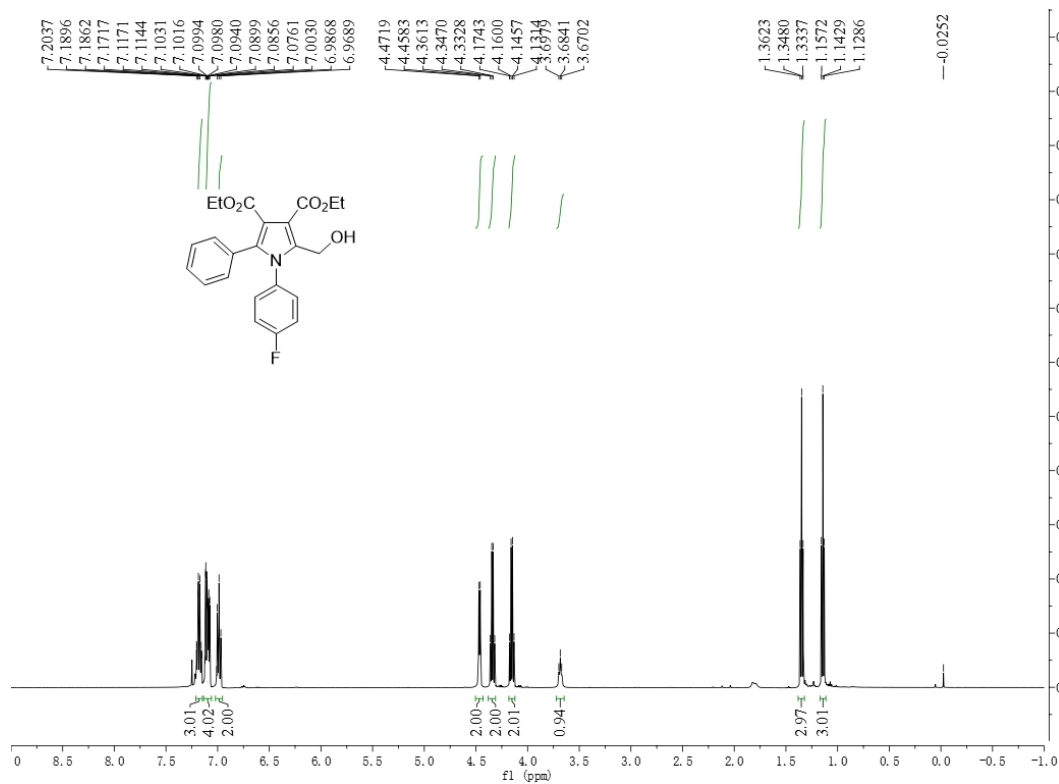

<sup>13</sup>C NMR (125 MHz, CDCl<sub>3</sub>)

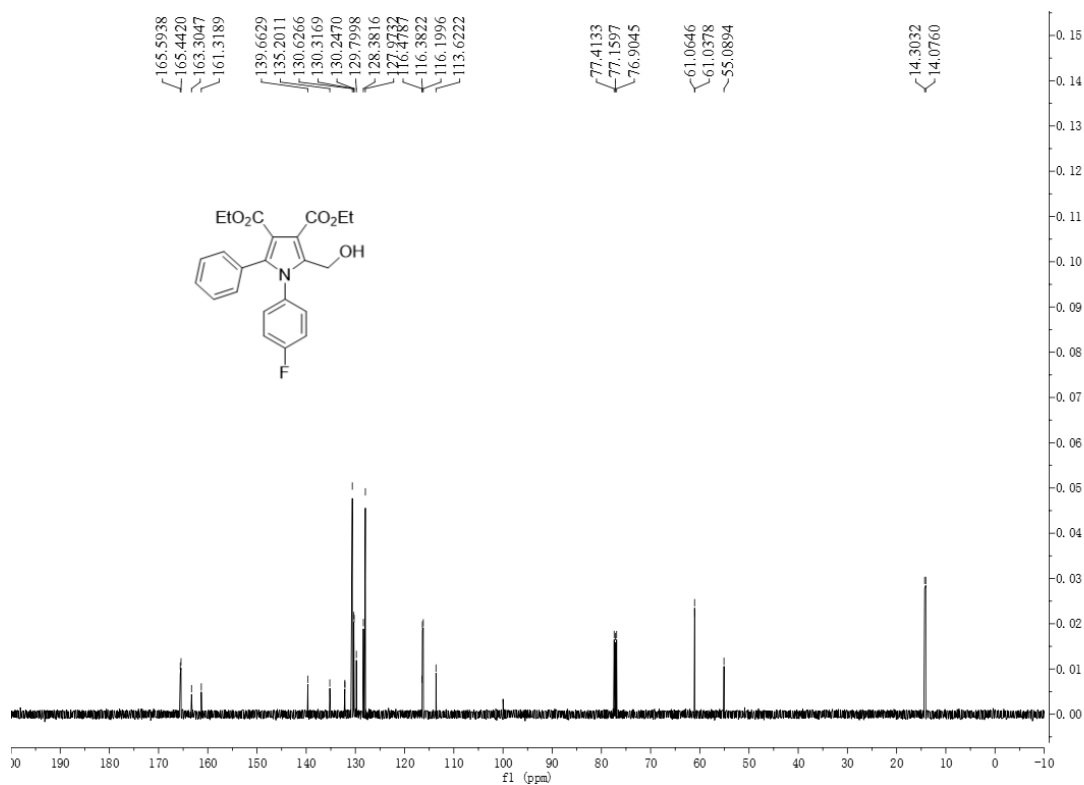

<sup>19</sup>F NMR (470 MHz, CDCl<sub>3</sub>)

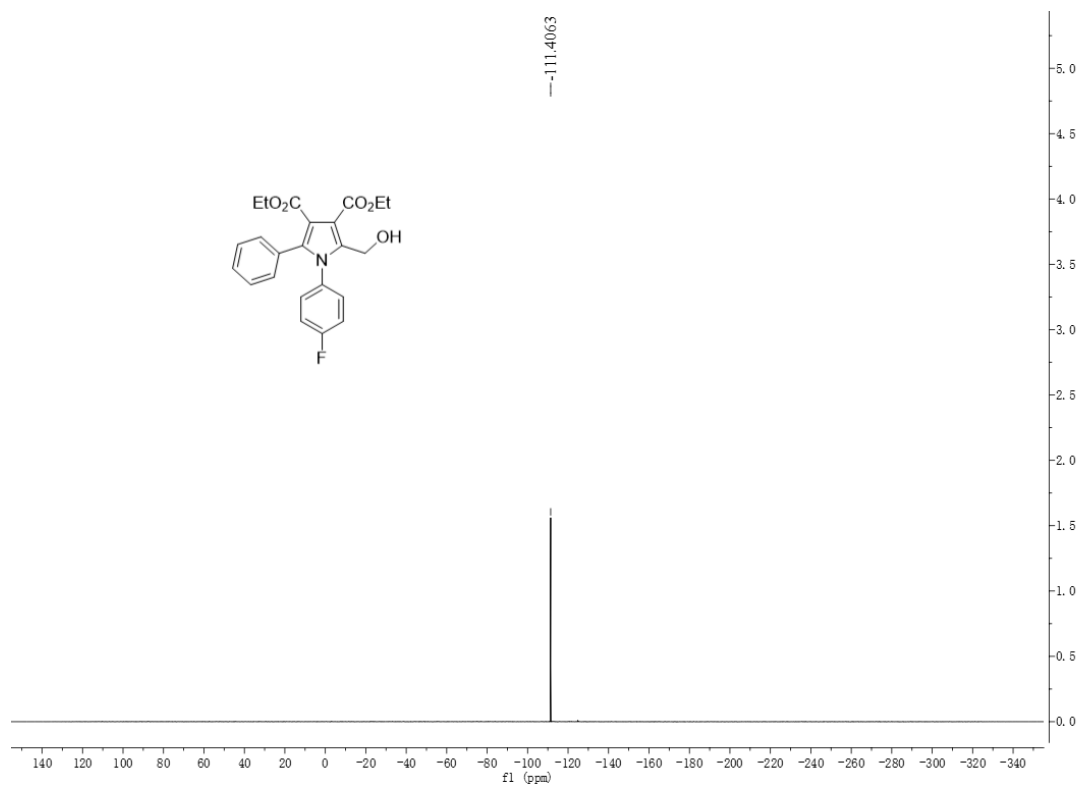

**Diethyl 1-(4-chlorophenyl)-2-(hydroxymethyl)-5-phenyl-1H-pyrrole-3,4-dicarboxylate (4ac)**

<sup>1</sup>H NMR (500 MHz, CDCl<sub>3</sub>)

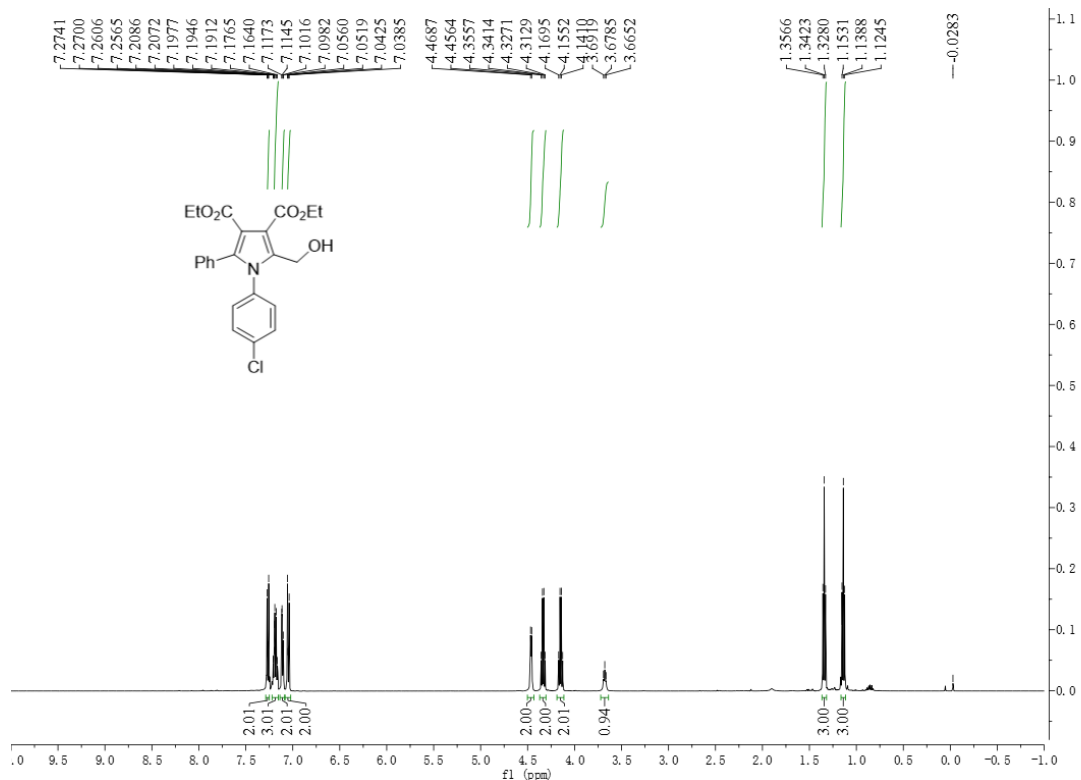

<sup>13</sup>C NMR (125 MHz, CDCl<sub>3</sub>)

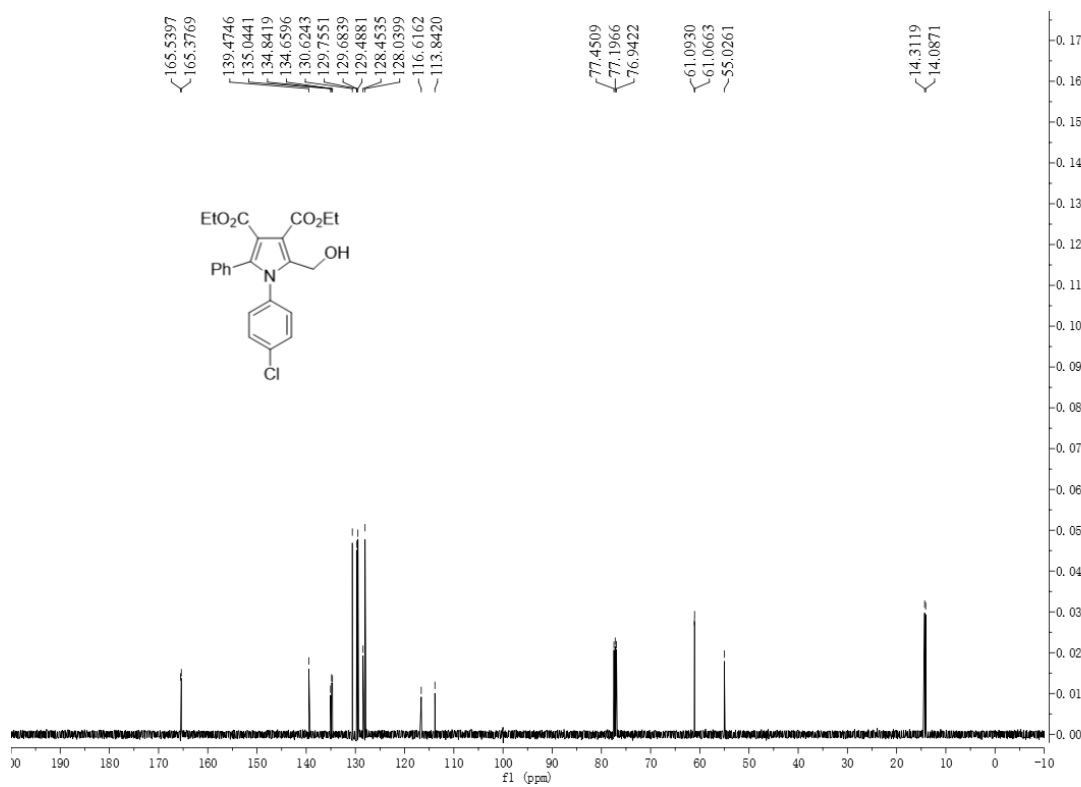

**Diethyl 1-(4-bromophenyl)-2-(hydroxymethyl)-5-phenyl-1H-pyrrole-3,4-dicarboxylate (4ad)**

<sup>1</sup>H NMR (500 MHz, CDCl<sub>3</sub>)

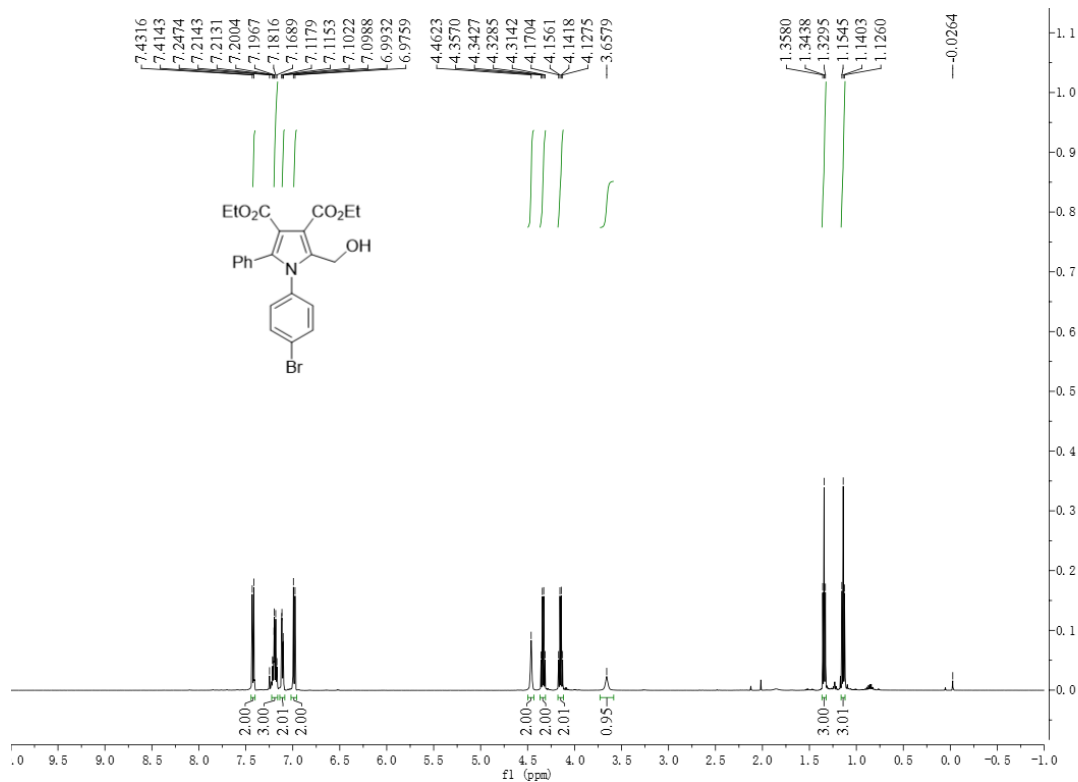

<sup>13</sup>C NMR (125 MHz, CDCl<sub>3</sub>)

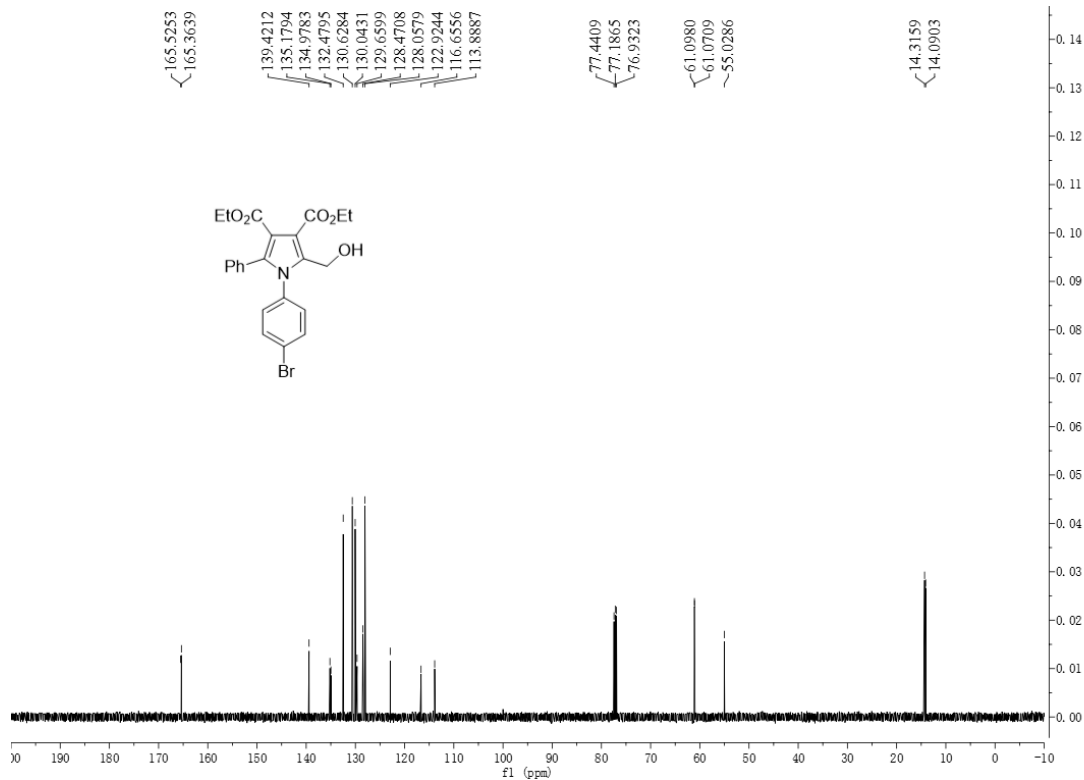

# Diethyl 2-(hydroxymethyl)-5-phenyl-1-(*p*-tolyl)-1*H*-pyrrole-3,4-dicarboxylate (4ae)

<sup>1</sup>H NMR (500 MHz, CDCl<sub>3</sub>)

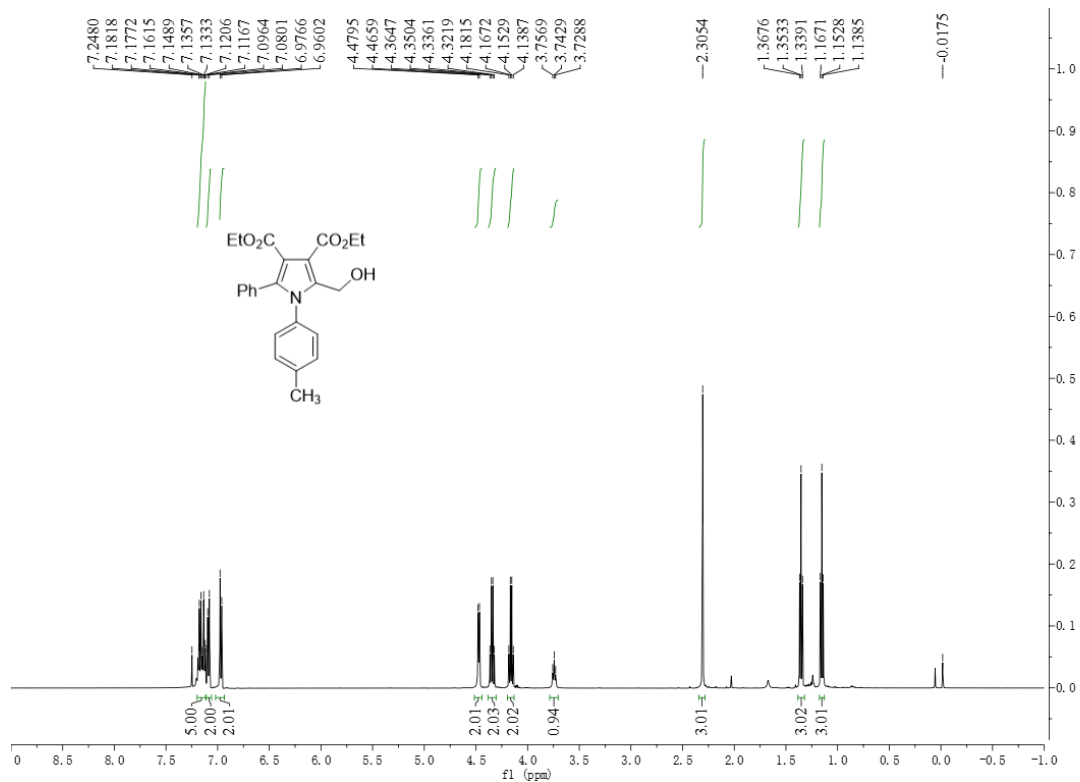

<sup>13</sup>C NMR (125 MHz, CDCl<sub>3</sub>)

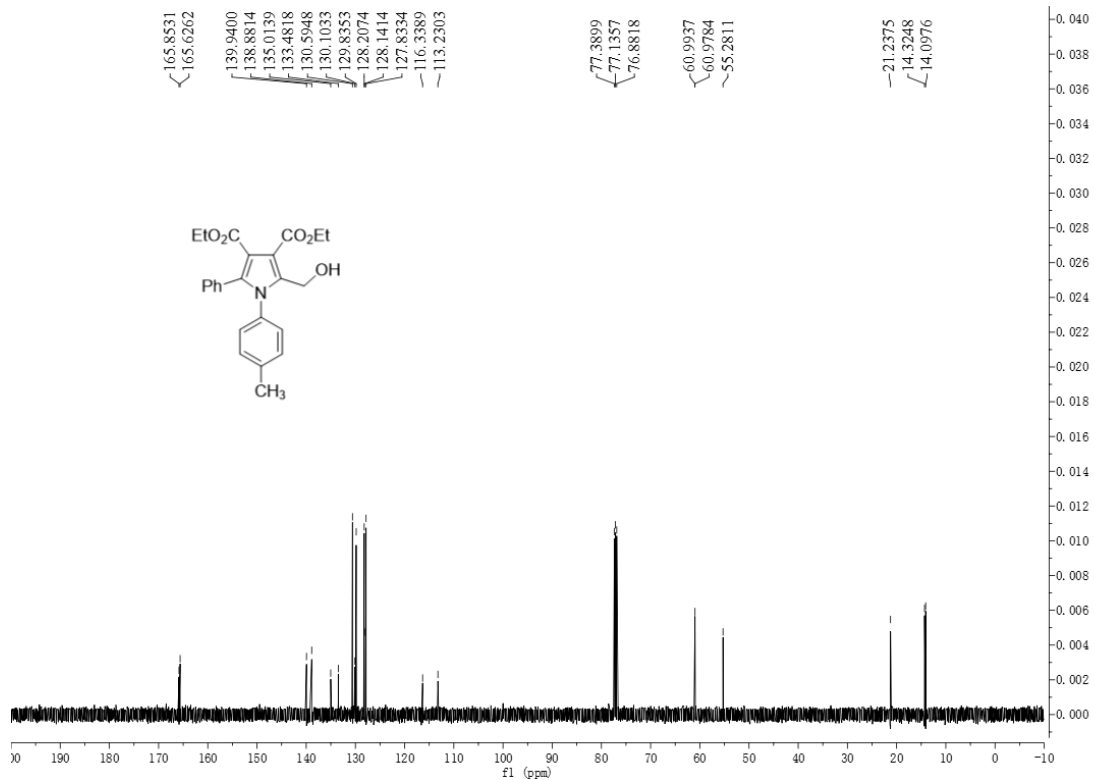

**Diethyl 2-(hydroxymethyl)-1-(4-methoxyphenyl)-5-phenyl-1H-pyrrole-3,4-dicarboxylate (4af)**

<sup>1</sup>H NMR (500 MHz, CDCl<sub>3</sub>)

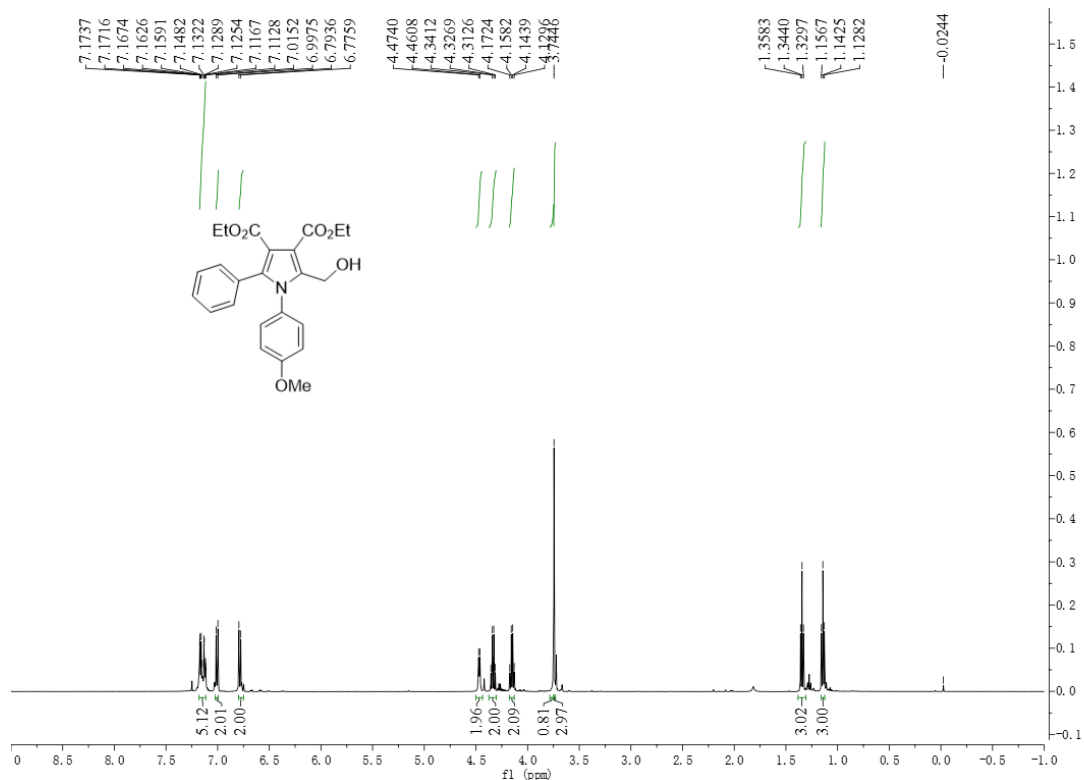

<sup>13</sup>C NMR (125 MHz, CDCl<sub>3</sub>)

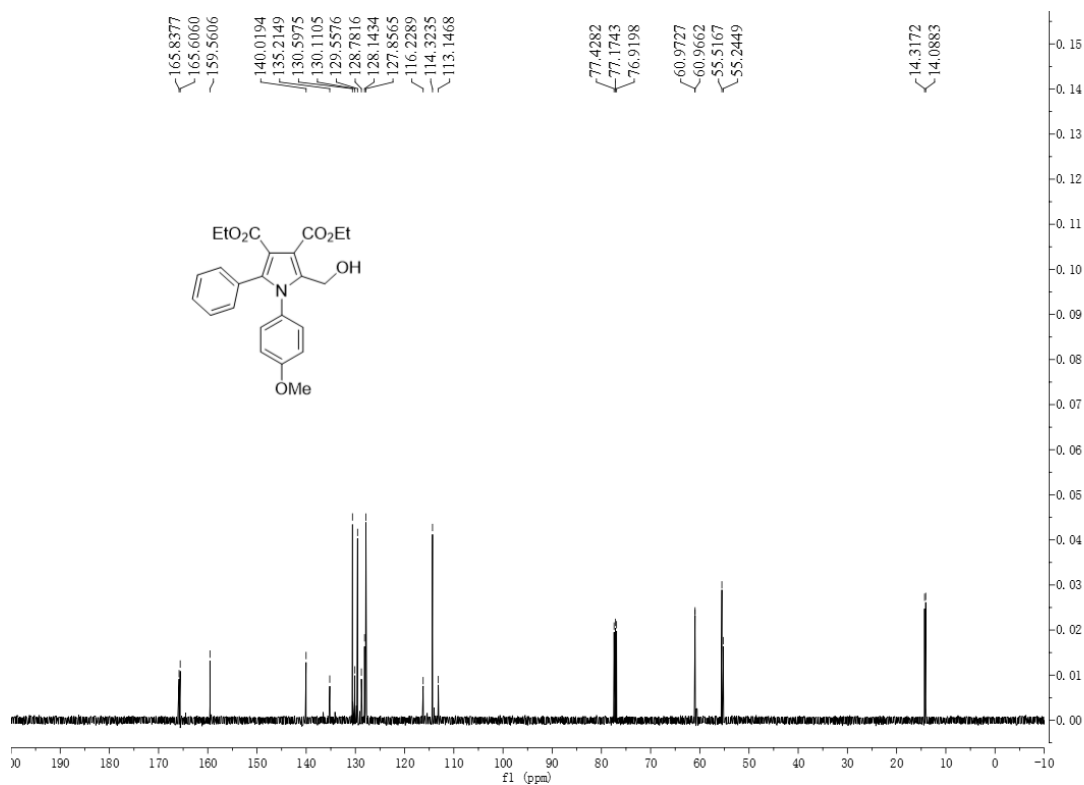

**Diethyl 2-(hydroxymethyl)-1-(4-hydroxyphenyl)-5-phenyl-1H-pyrrole-3,4-dicarboxylate (4ag)**

<sup>1</sup>H NMR (500 MHz, CDCl<sub>3</sub>)

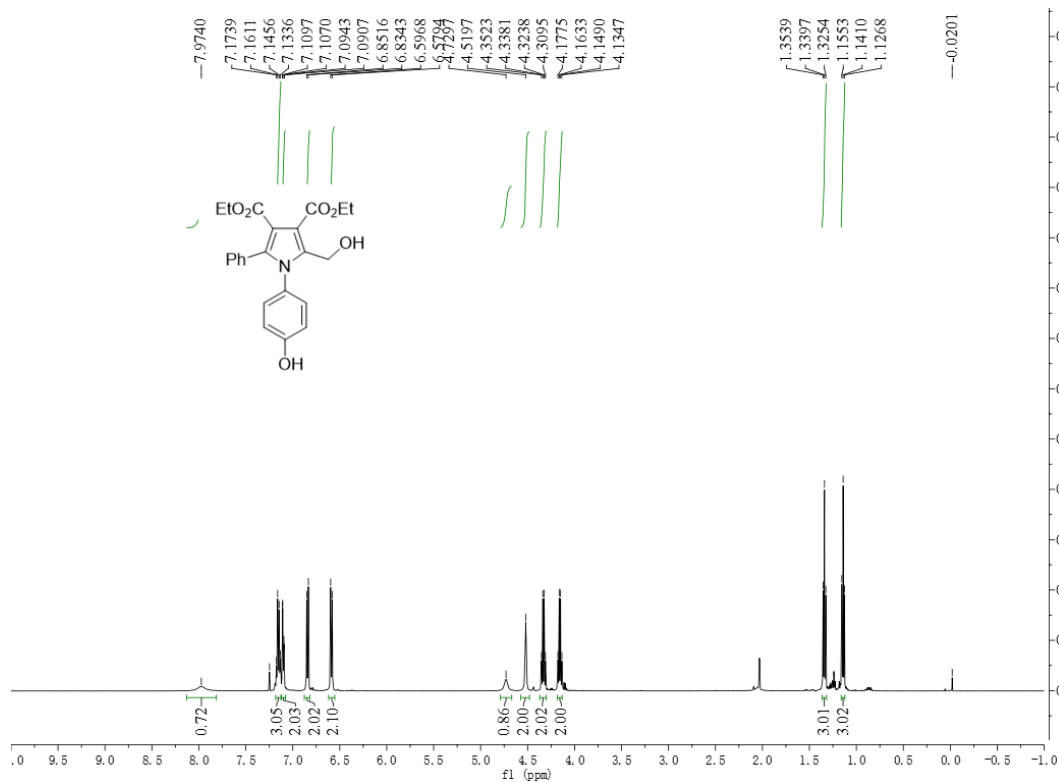

<sup>13</sup>C NMR (125 MHz, CDCl<sub>3</sub>)

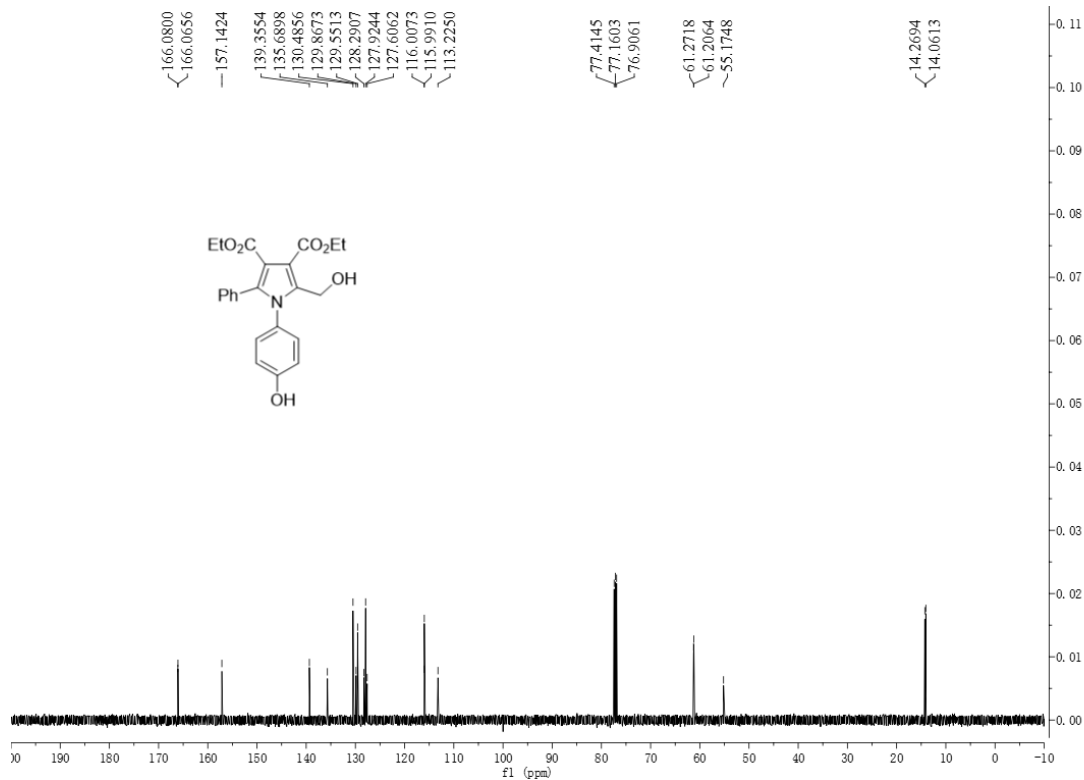



**Diethyl 2-(hydroxymethyl)-5-phenyl-1-(4-(trifluoromethyl)phenyl)-1H-pyrrole-3,4-dicarboxylate (4ah)**

<sup>1</sup>H NMR (500 MHz, CDCl<sub>3</sub>)

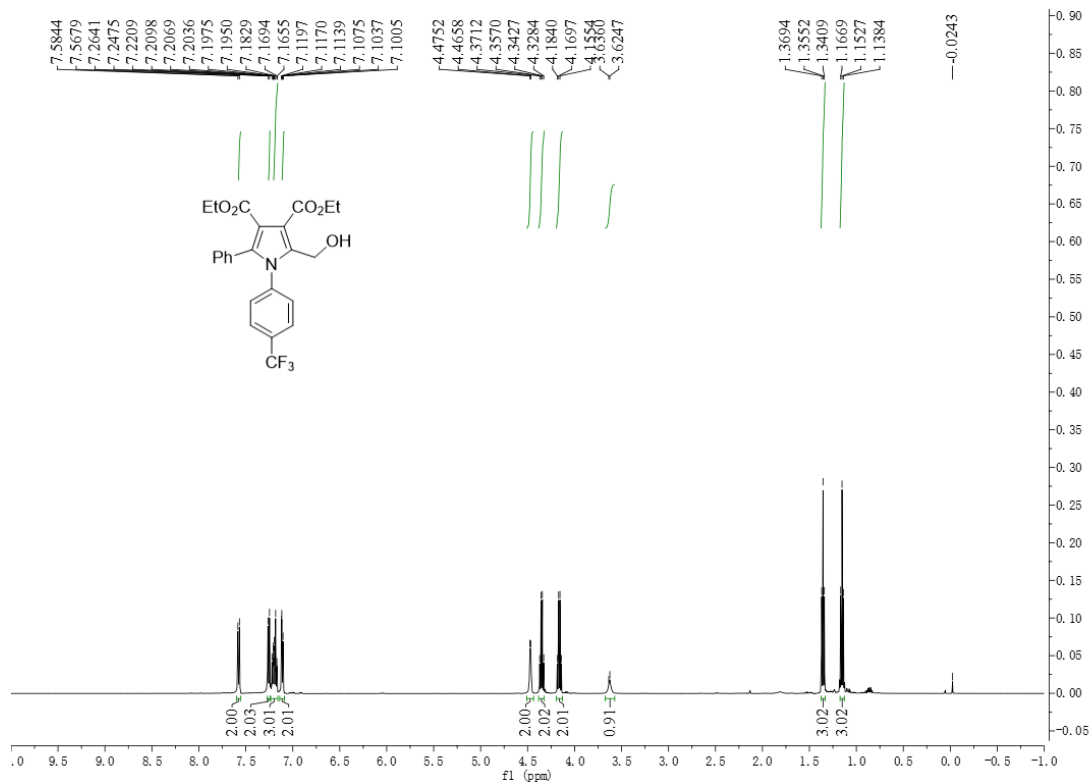

<sup>13</sup>C NMR (125 MHz, CDCl<sub>3</sub>)

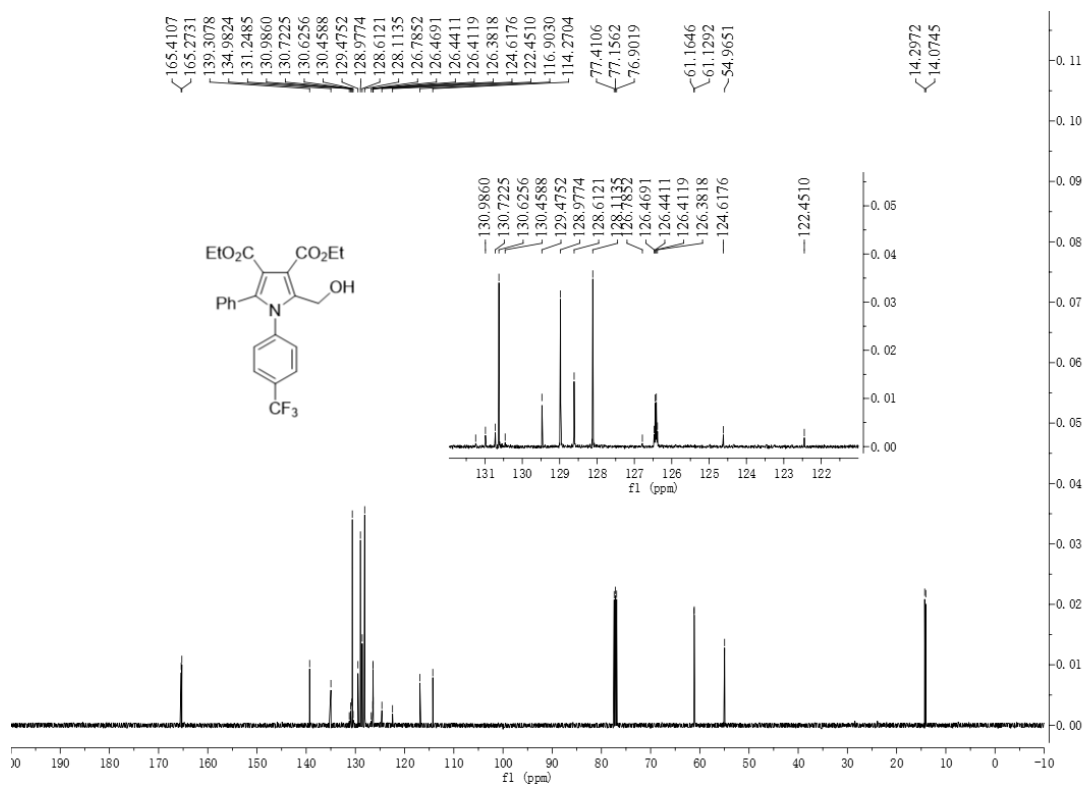

$^{19}\text{F}$  NMR (470 MHz,  $\text{CDCl}_3$ )

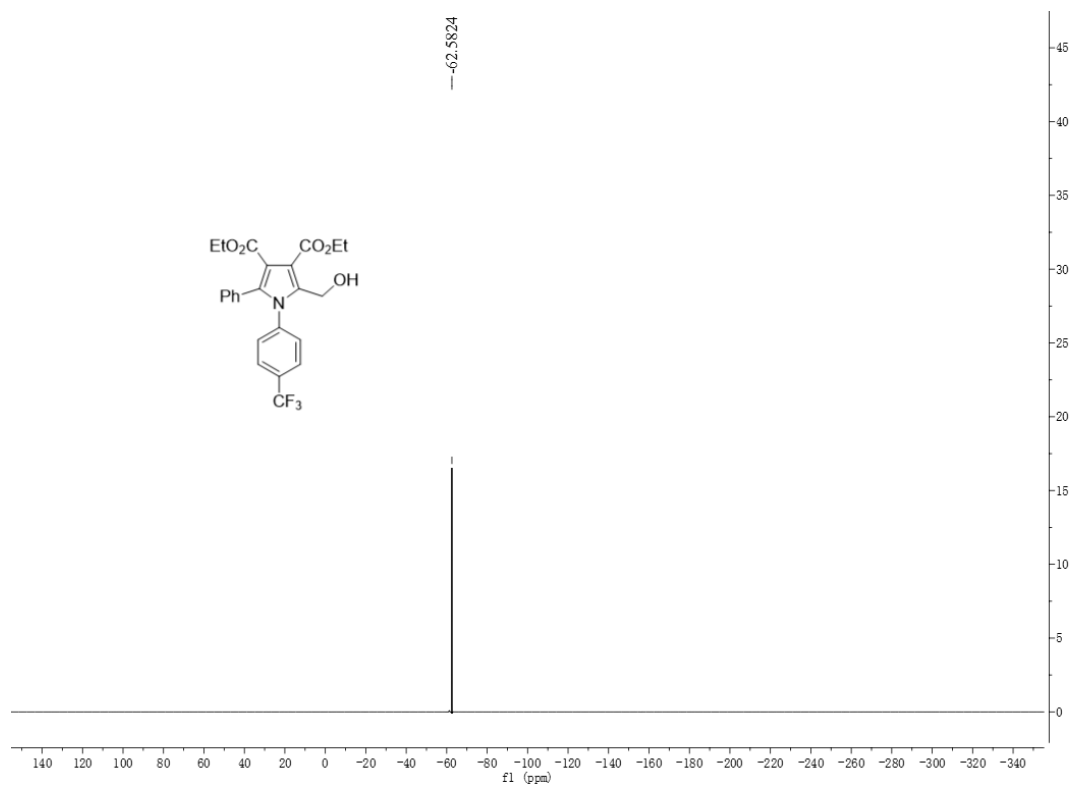

**Diethyl 1-(4-(cyanomethyl)phenyl)-2-(hydroxymethyl)-5-phenyl-1H-pyrrole-3,4-dicarboxylate (4ai)**

$^1\text{H}$  NMR (500 MHz,  $\text{CDCl}_3$ )

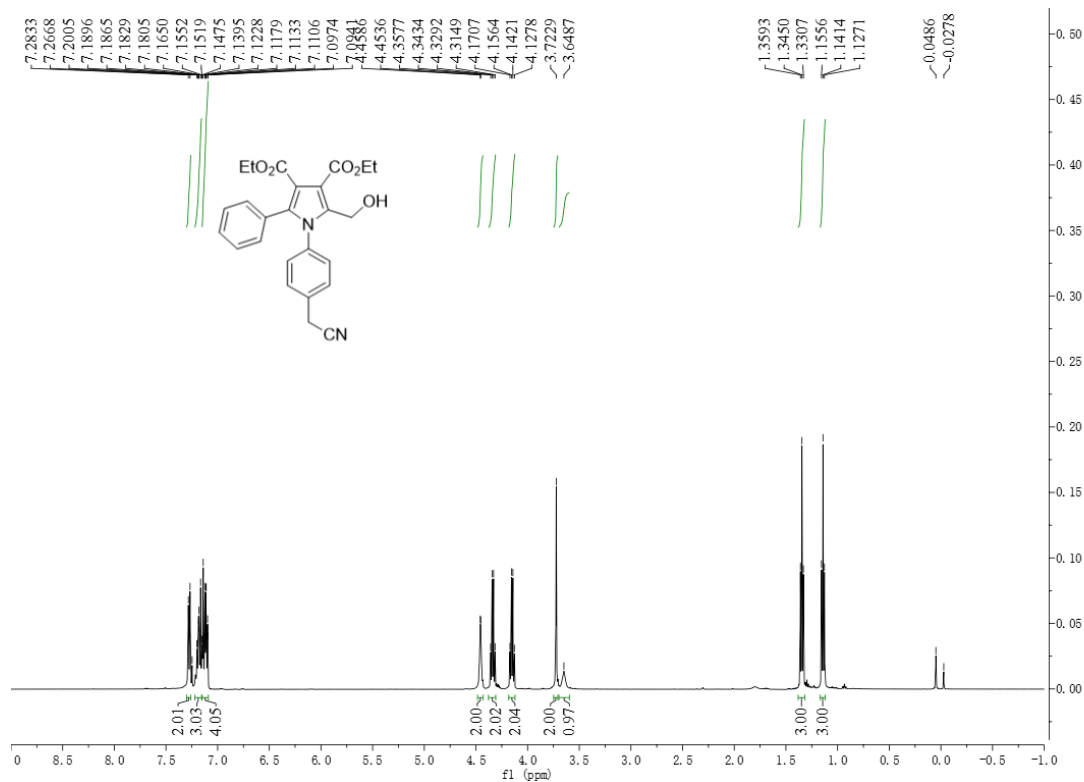

$^{13}\text{C}$  NMR (125 MHz,  $\text{CDCl}_3$ )

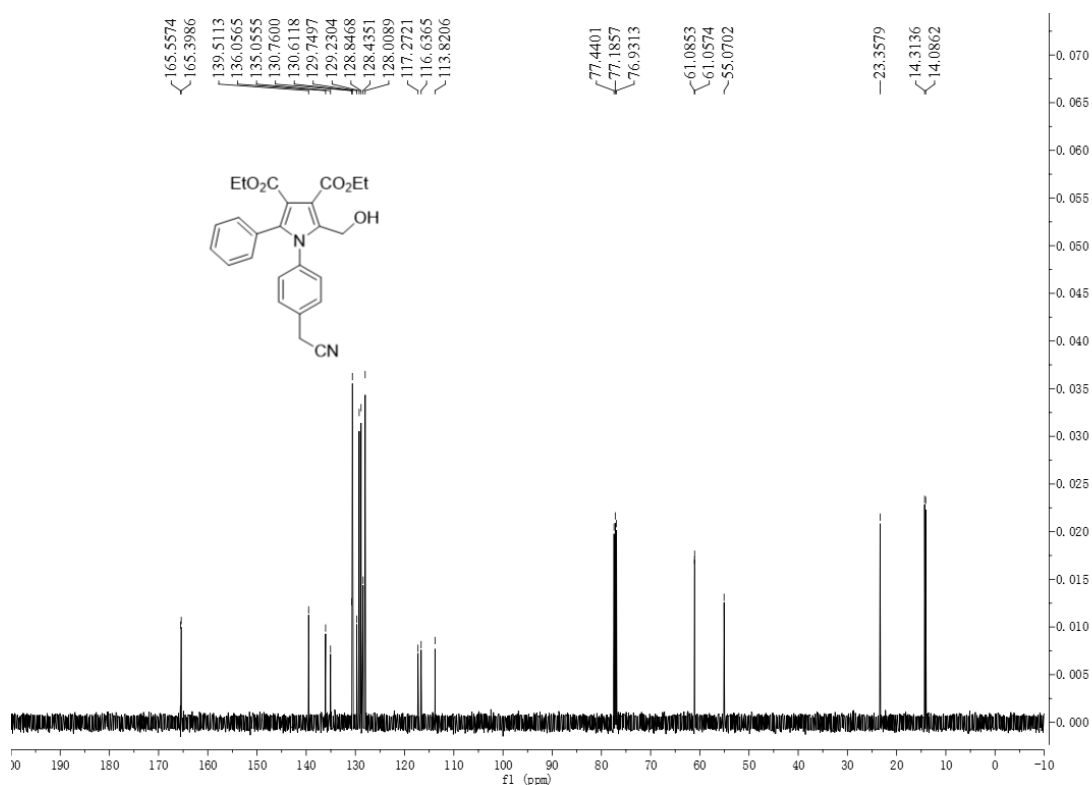

Diethyl 2-(hydroxymethyl)-1-(4-(methylthio)phenyl)-5-phenyl-1*H*-pyrrole-3,4-dicarboxylate  
(4aj)

$^1\text{H}$  NMR (500 MHz,  $\text{CDCl}_3$ )

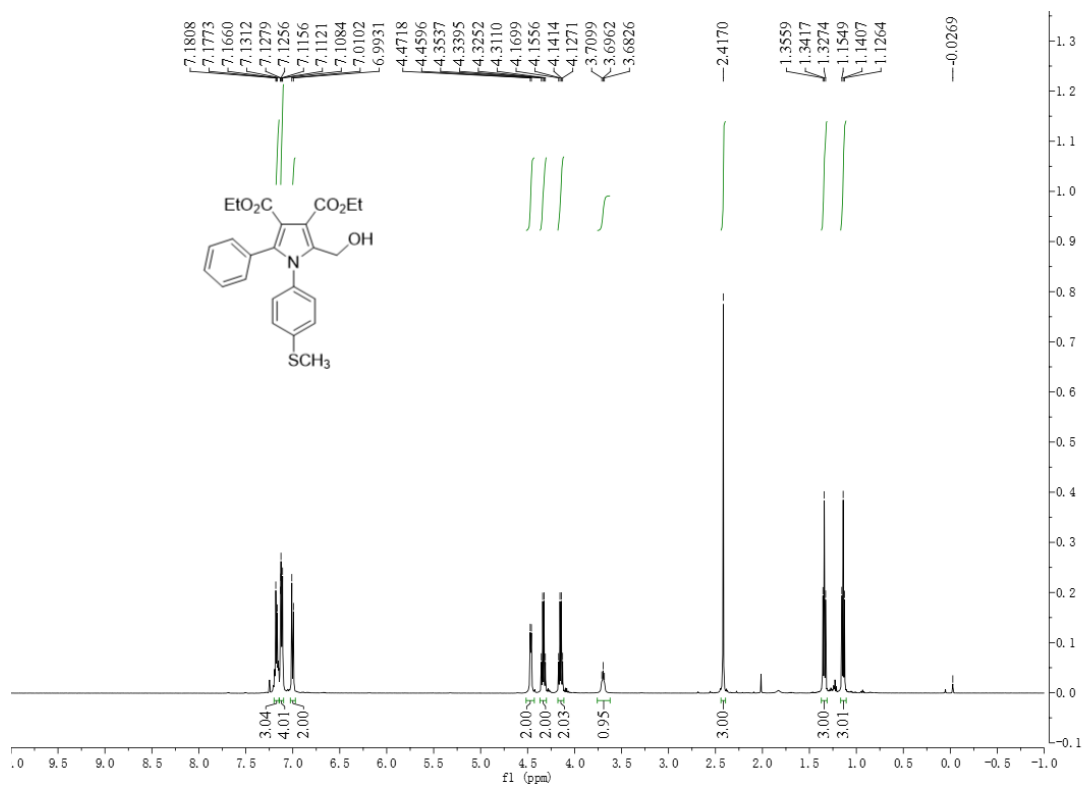

$^{13}\text{C}$  NMR (125 MHz,  $\text{CDCl}_3$ )

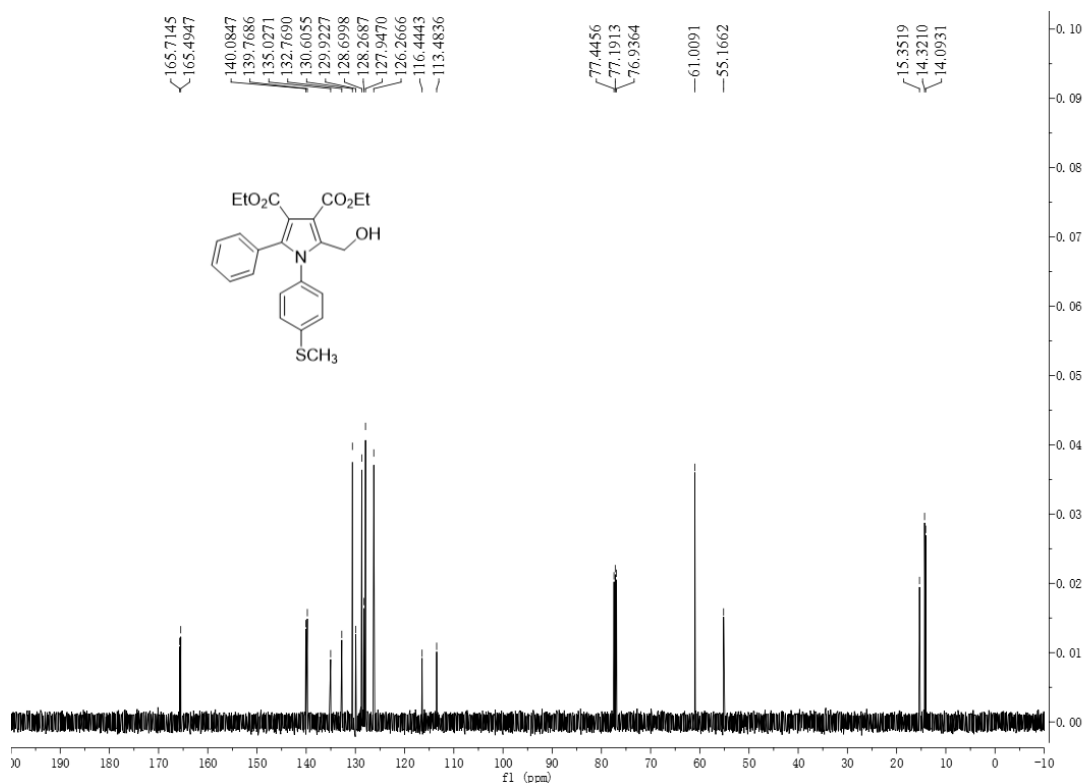

Diethyl 2-(hydroxymethyl)-5-phenyl-1-(o-tolyl)-1H-pyrrole-3,4-dicarboxylate (4ak)

$^1\text{H}$  NMR (500 MHz,  $\text{CDCl}_3$ )

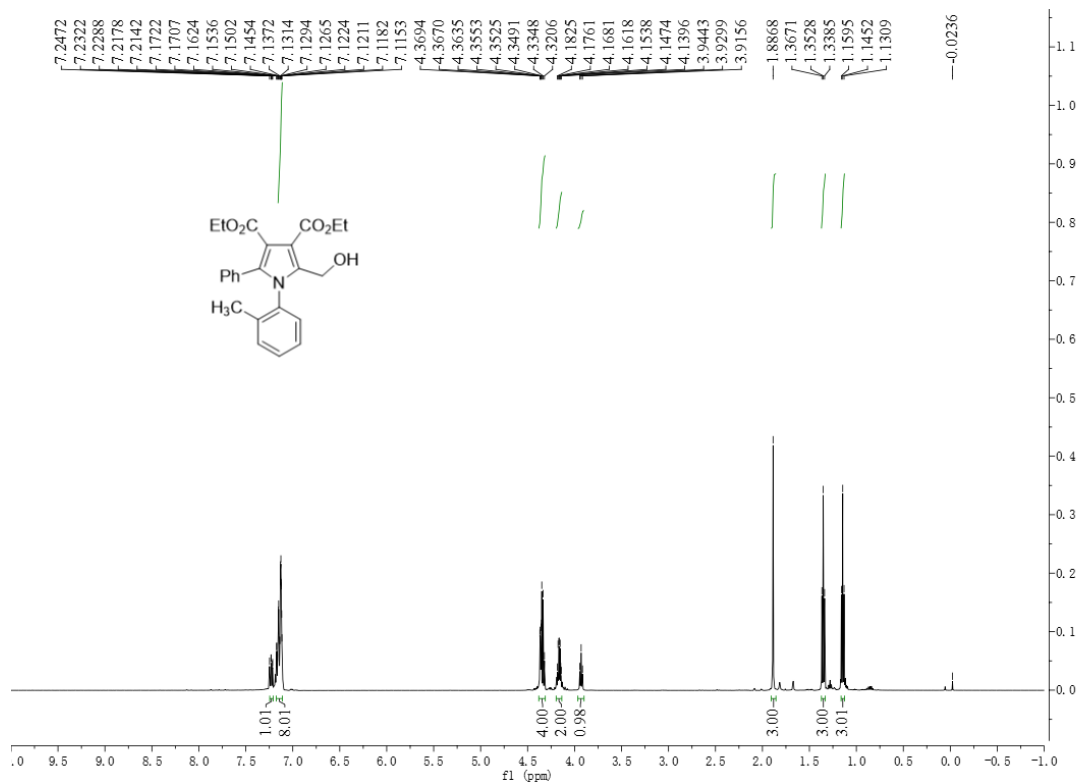

$^{13}\text{C}$  NMR (125 MHz,  $\text{CDCl}_3$ )

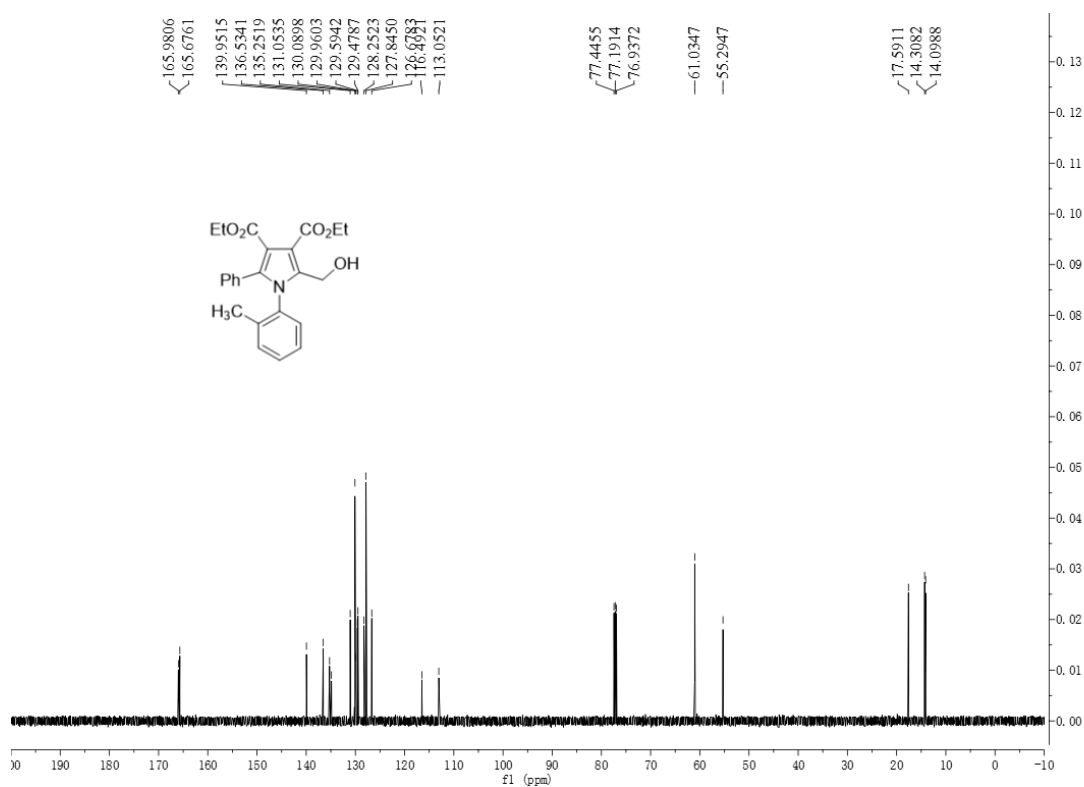

Diethyl 2-(hydroxymethyl)-1-(3-hydroxyphenyl)-5-phenyl-1H-pyrrole-3,4-dicarboxylate (4a)

$^1\text{H}$  NMR (500 MHz,  $\text{CDCl}_3$ )

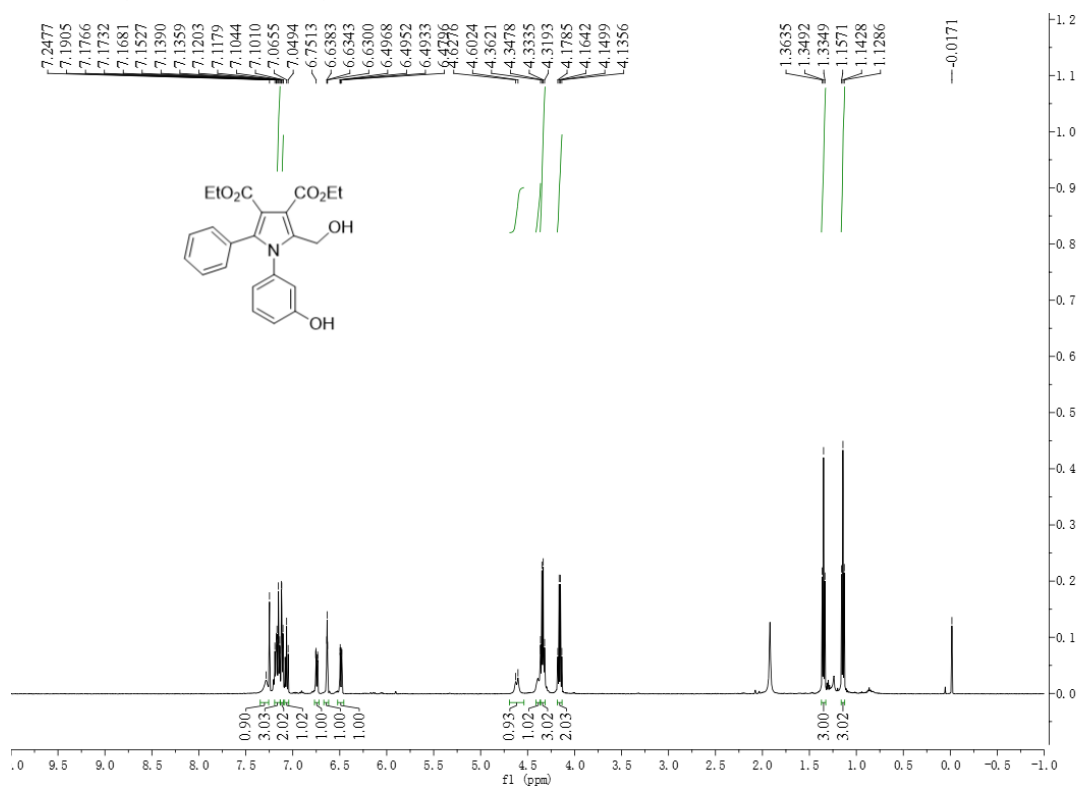

<sup>13</sup>C NMR (125 MHz, CDCl<sub>3</sub>)

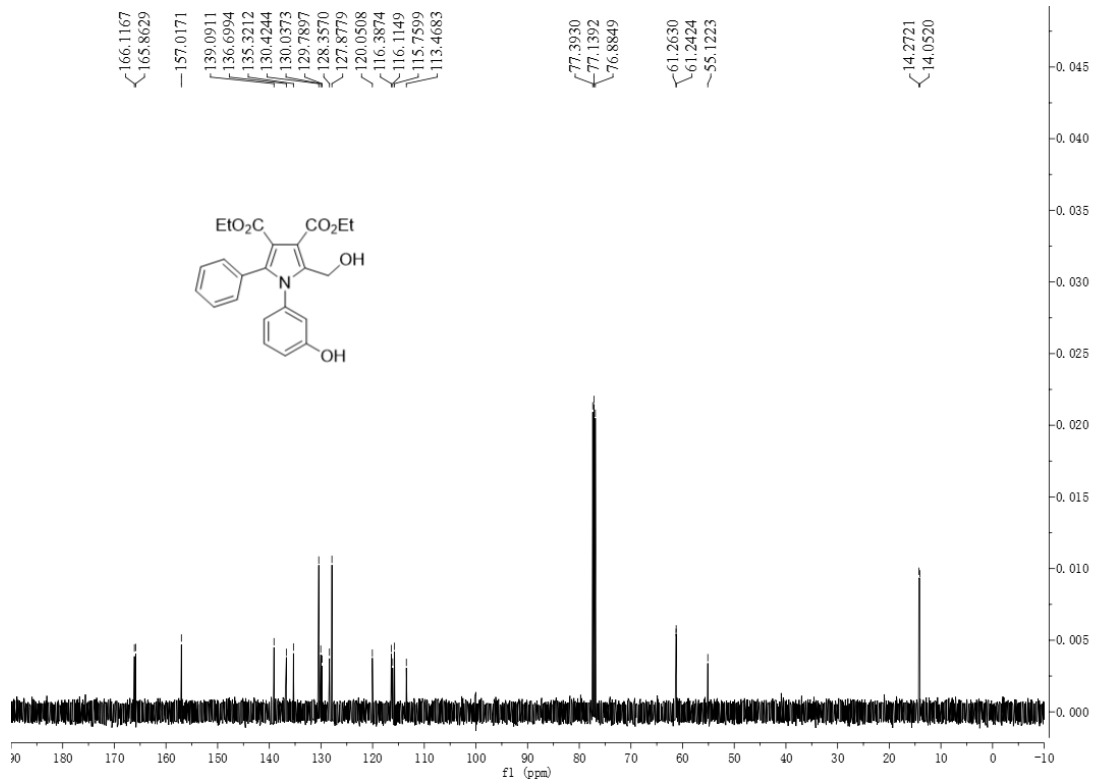

Diethyl 2-(hydroxymethyl)-1-(naphthalen-1-yl)-5-phenyl-1H-pyrrole-3,4-dicarboxylate (4am)

<sup>1</sup>H NMR (500 MHz, CDCl<sub>3</sub>)

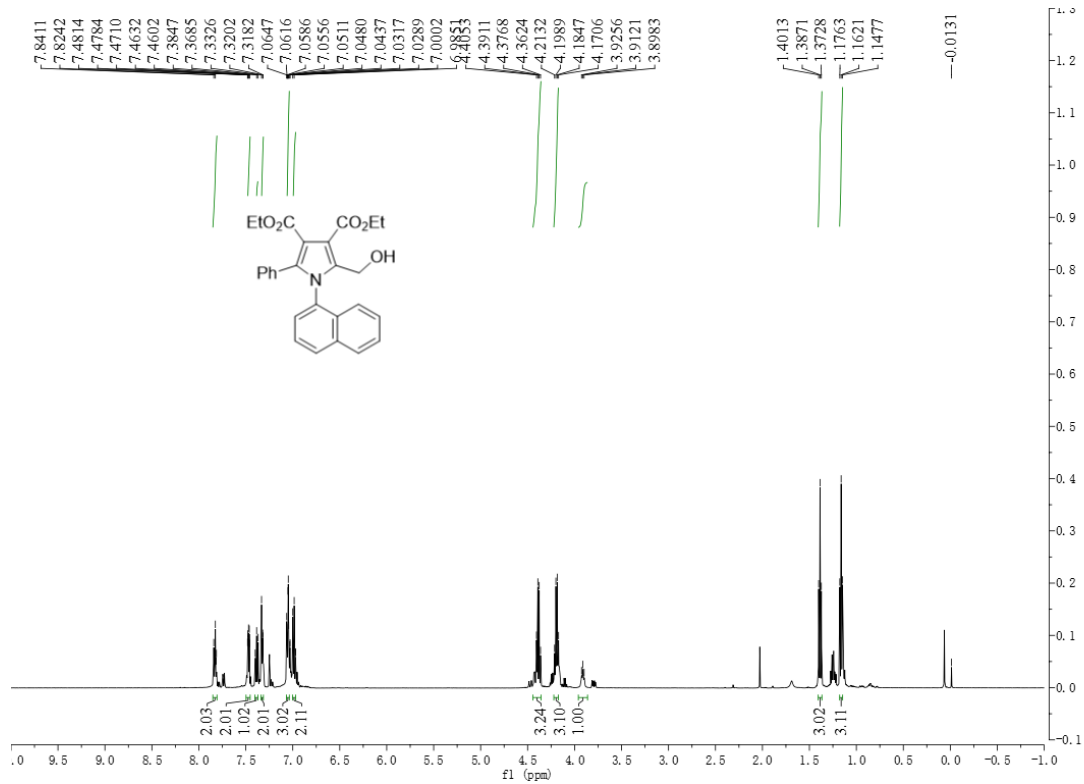

$^{13}\text{C}$  NMR (125 MHz,  $\text{CDCl}_3$ )

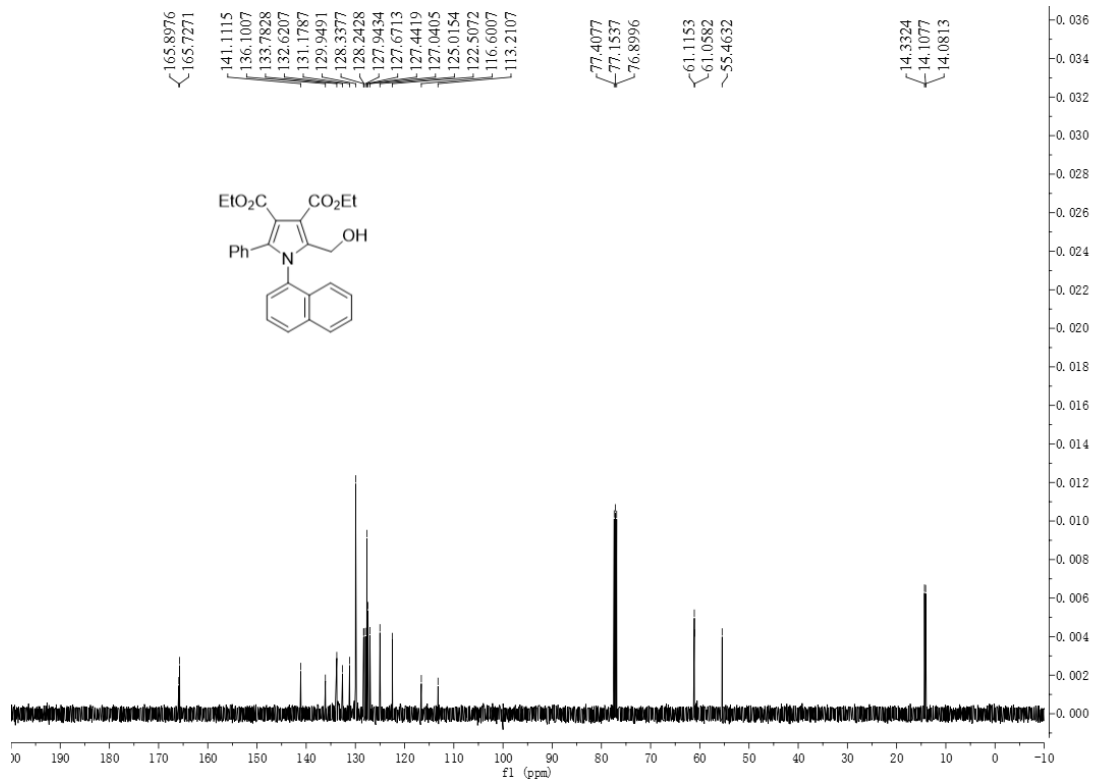

**Diethyl 2-(hydroxymethyl)-1-(7-hydroxynaphthalen-1-yl)-5-phenyl-1H-pyrrole-3,4-dicarboxylate (4an)**

$^1\text{H}$  NMR (500 MHz,  $\text{CDCl}_3$ )

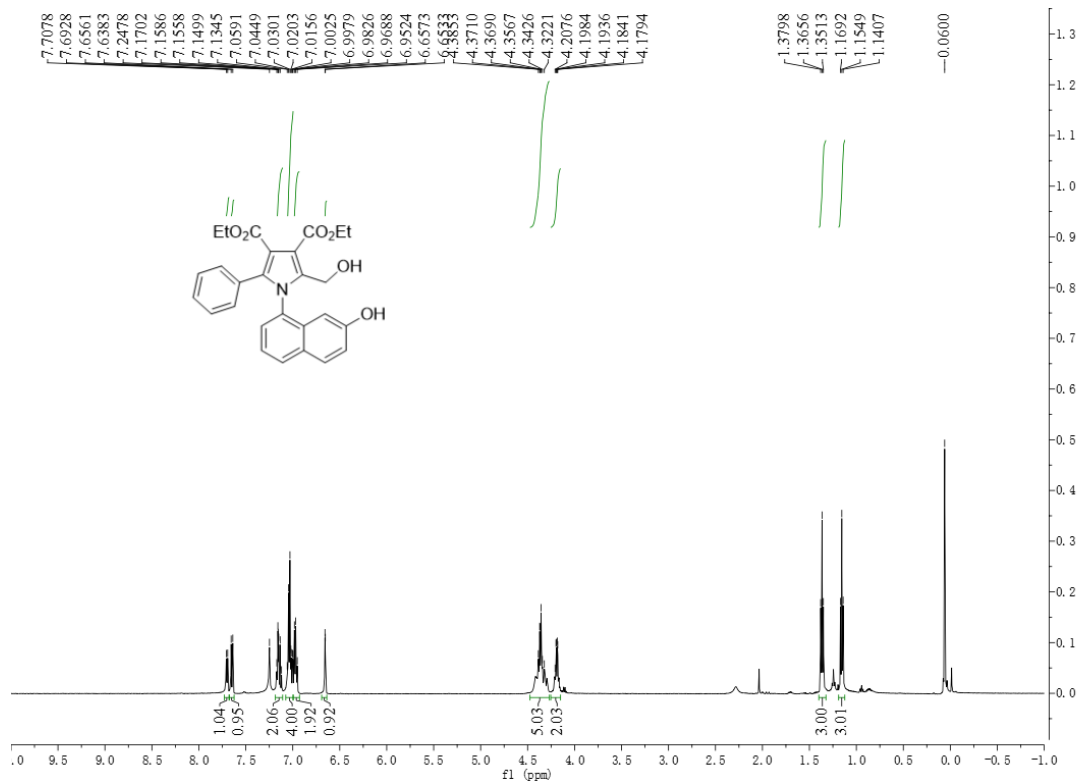

$^{13}\text{C}$  NMR (125 MHz,  $\text{CDCl}_3$ )

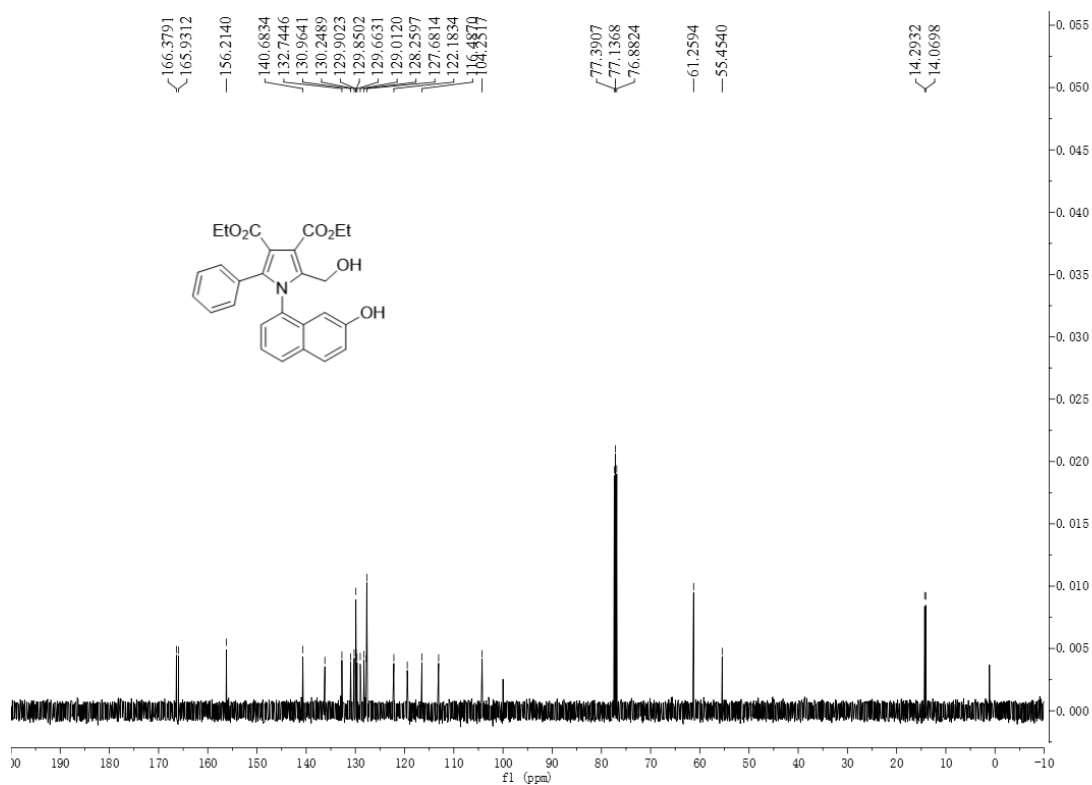

Diethyl 2-(hydroxymethyl)-1-(5-hydroxynaphthalen-1-yl)-5-phenyl-1H-pyrrole-3,4-dicarboxylate (4a)

$^1\text{H}$  NMR (500 MHz,  $\text{CDCl}_3$ )

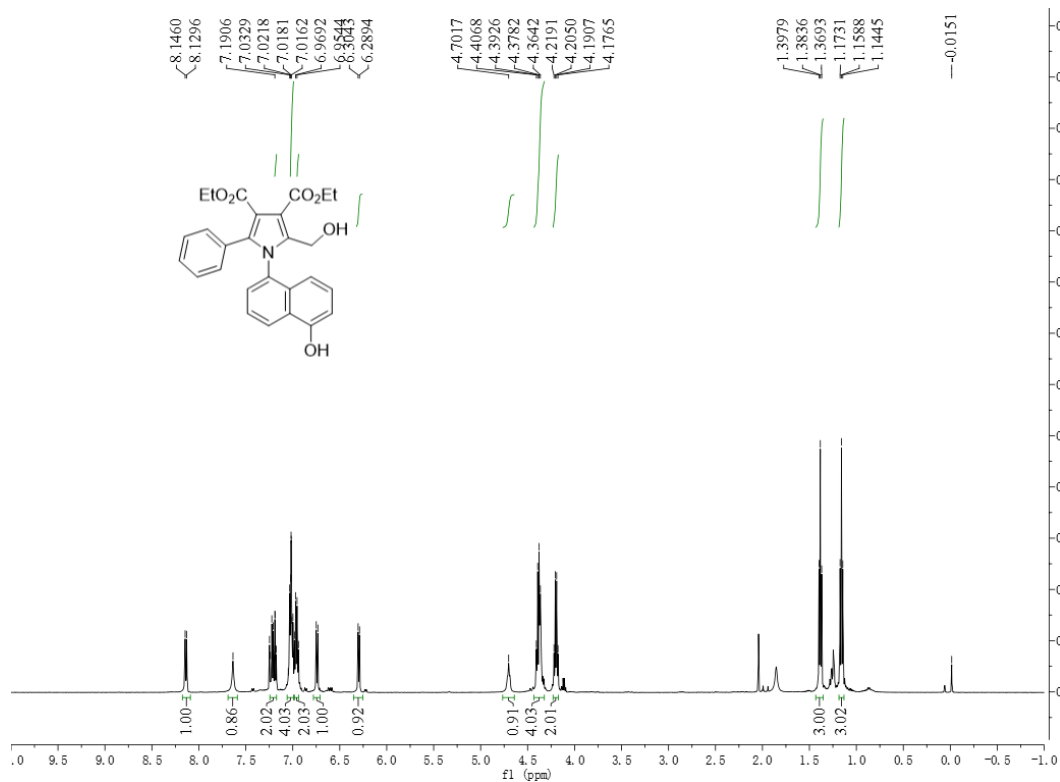



<sup>13</sup>C NMR (125 MHz, CDCl<sub>3</sub>)

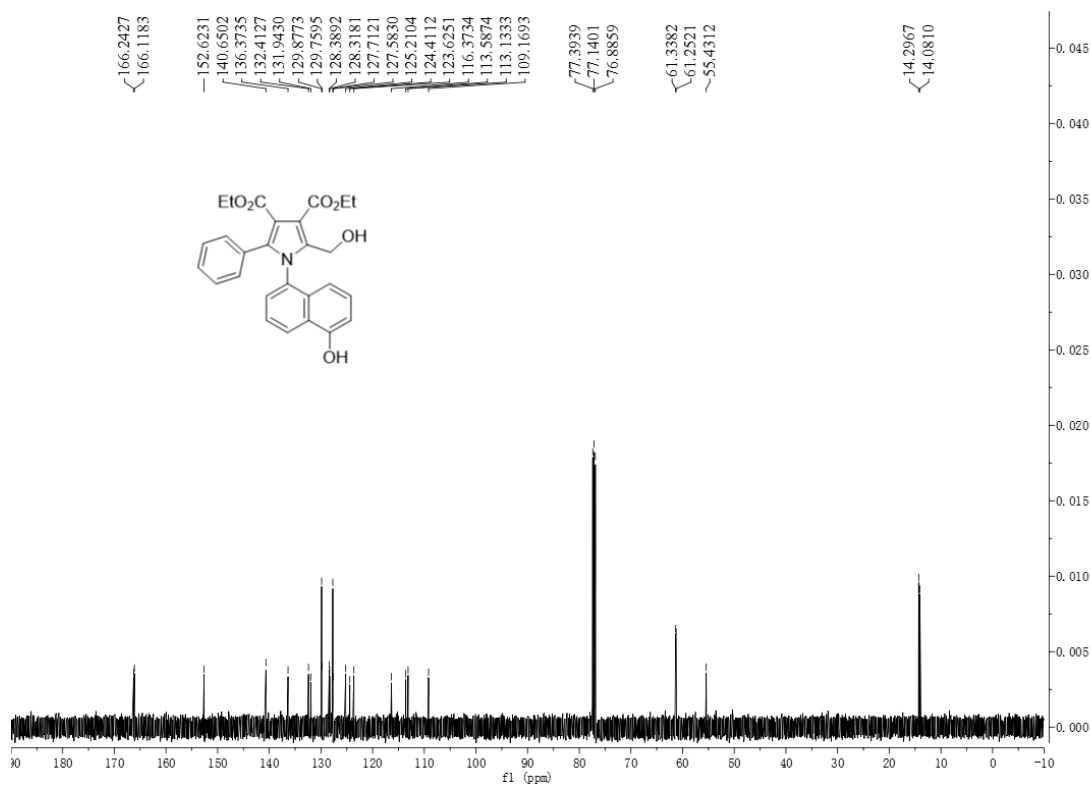

Diethyl 2-(hydroxymethyl)-1-(1H-indol-5-yl)-5-phenyl-1H-pyrrole-3,4-dicarboxylate (4ap)

<sup>1</sup>H NMR (500 MHz, CDCl<sub>3</sub>)

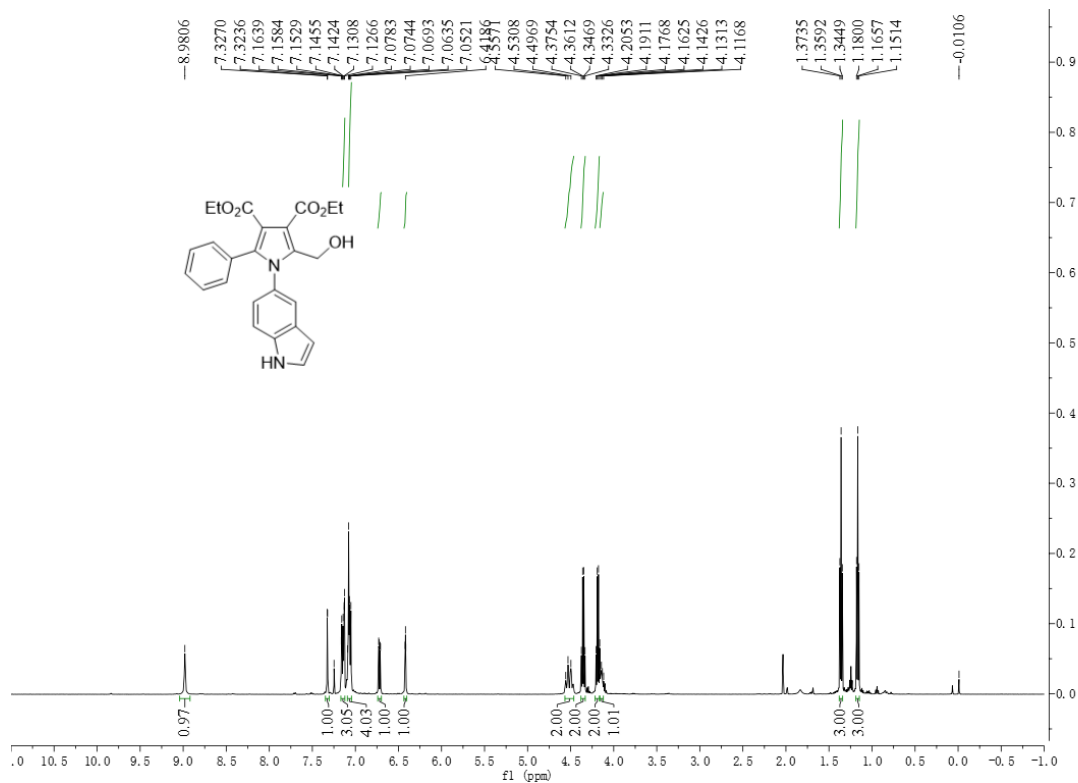

<sup>13</sup>C NMR (125 MHz, CDCl<sub>3</sub>)

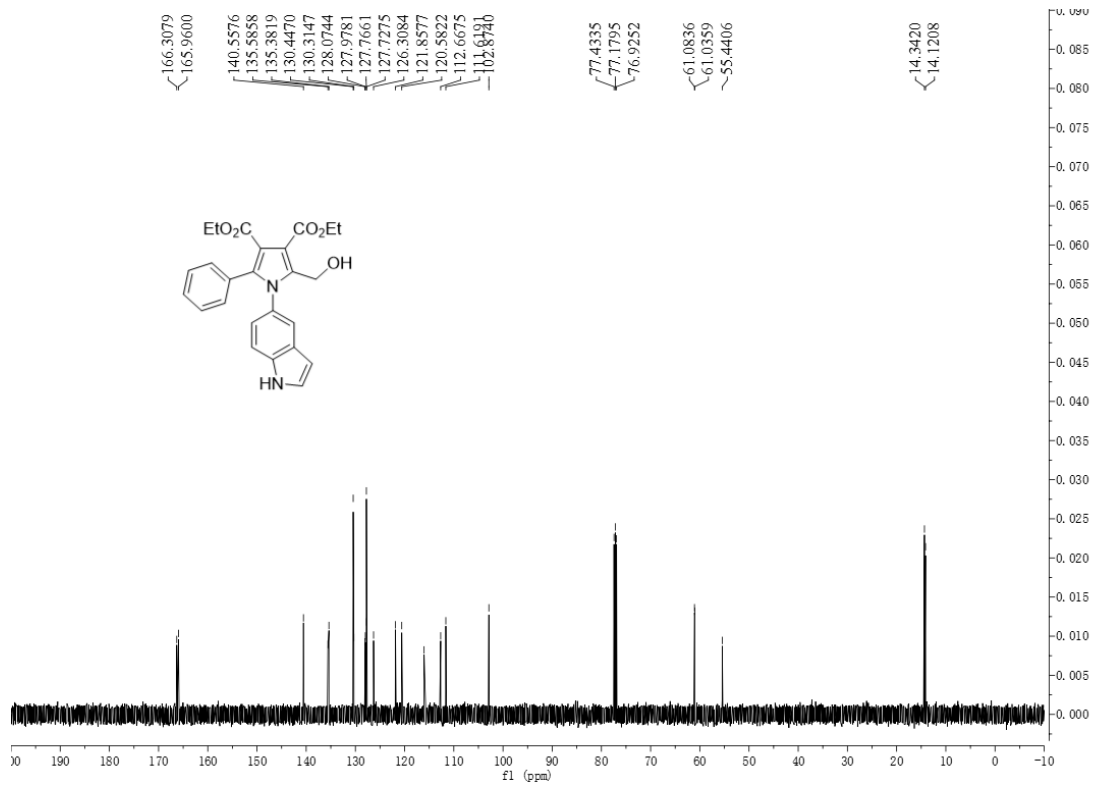

Diethyl 2-(hydroxymethyl)-1-(1H-indol-4-yl)-5-phenyl-1H-pyrrole-3,4-dicarboxylate (4aq)

<sup>1</sup>H NMR (500 MHz, CDCl<sub>3</sub>)

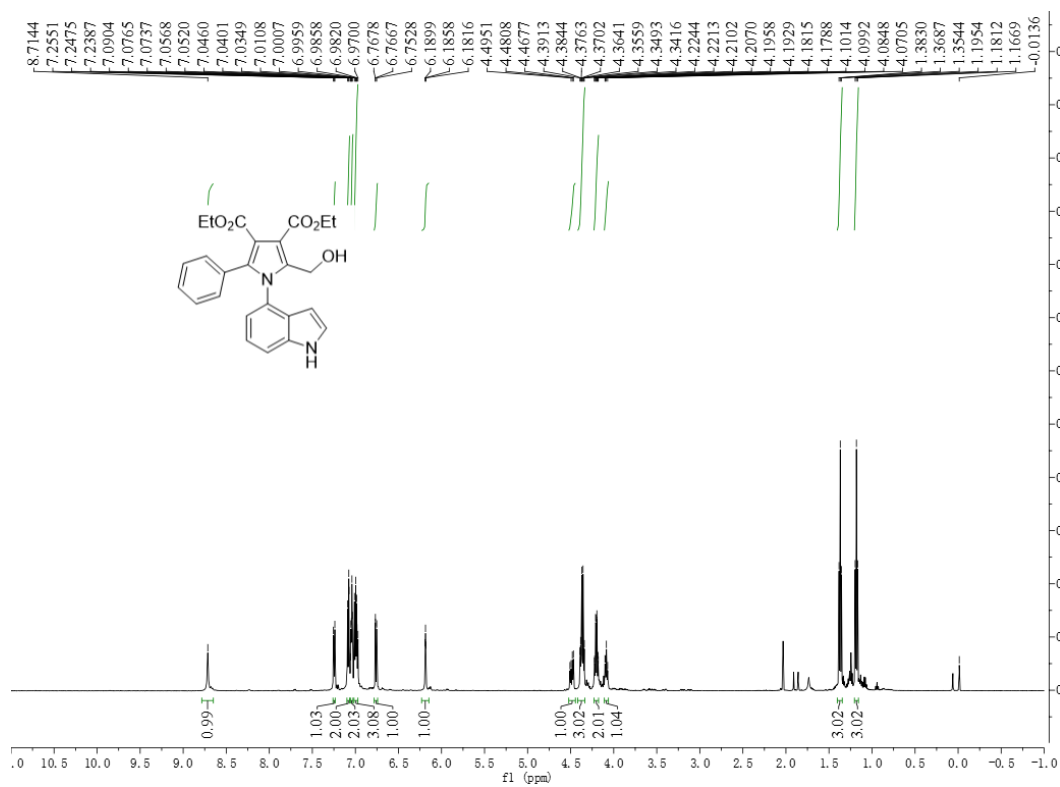

$^{13}\text{C}$  NMR (125 MHz,  $\text{CDCl}_3$ )

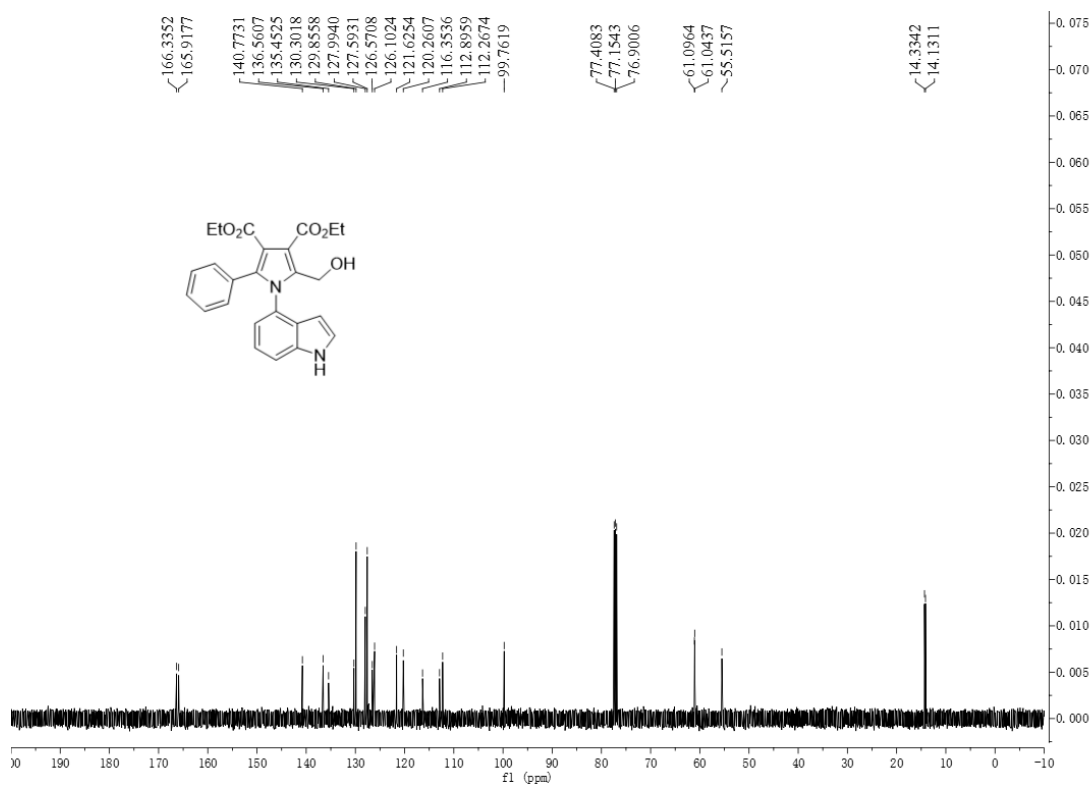

Diethyl 1-benzyl-2-(hydroxymethyl)-5-phenyl-1H-pyrrole-3,4-dicarboxylate (4ar)

$^1\text{H}$  NMR (500 MHz,  $\text{CDCl}_3$ )

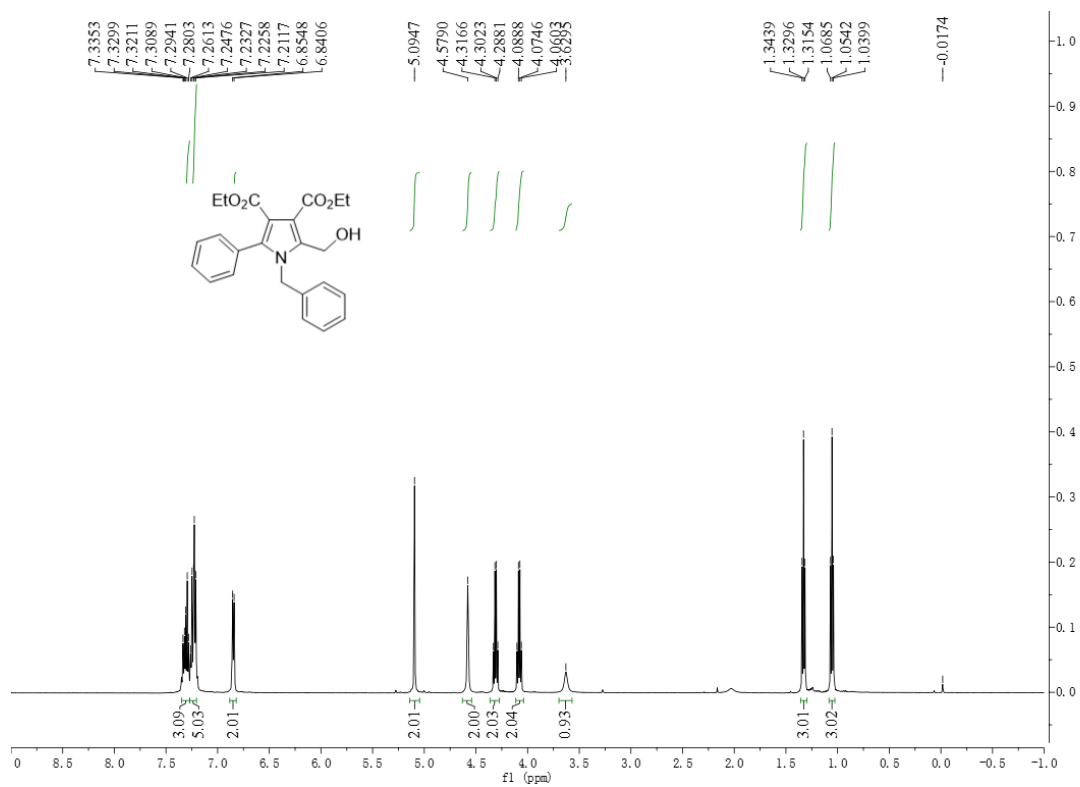

$^{13}\text{C}$  NMR (125 MHz,  $\text{CDCl}_3$ )

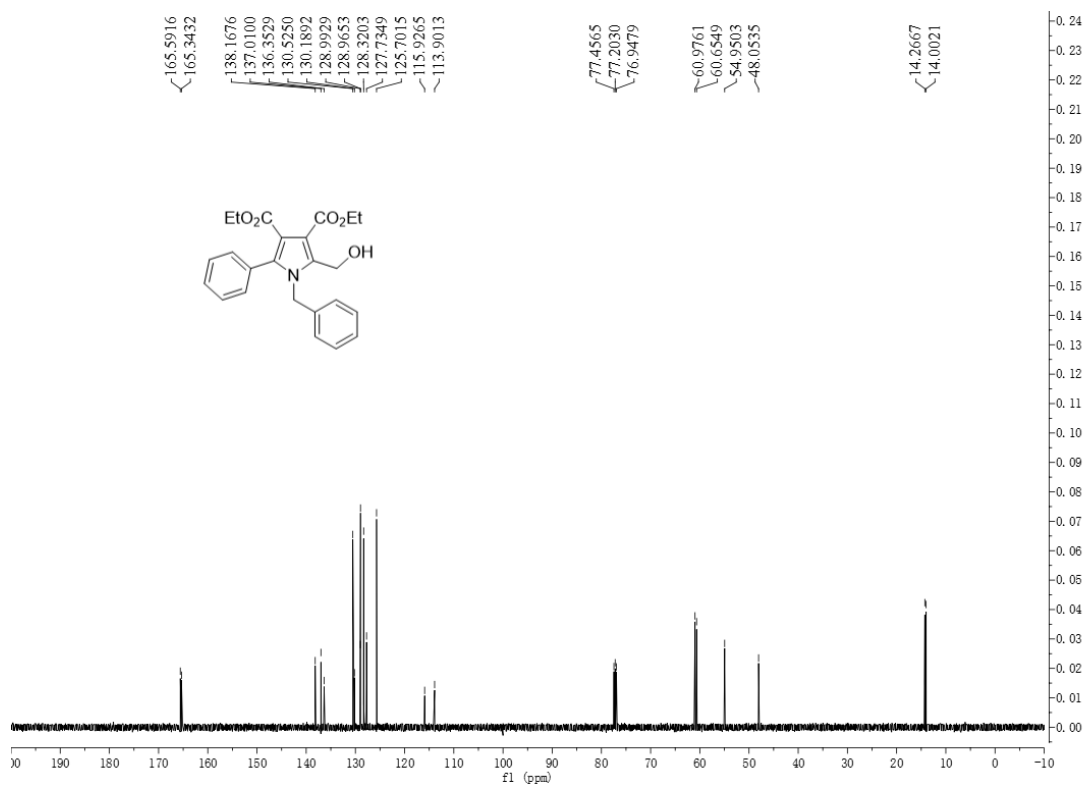

Diethyl 1-butyl-2-(hydroxymethyl)-5-phenyl-1*H*-pyrrole-3,4-dicarboxylate (**4a**)

$^1\text{H}$  NMR (500 MHz,  $\text{CDCl}_3$ )

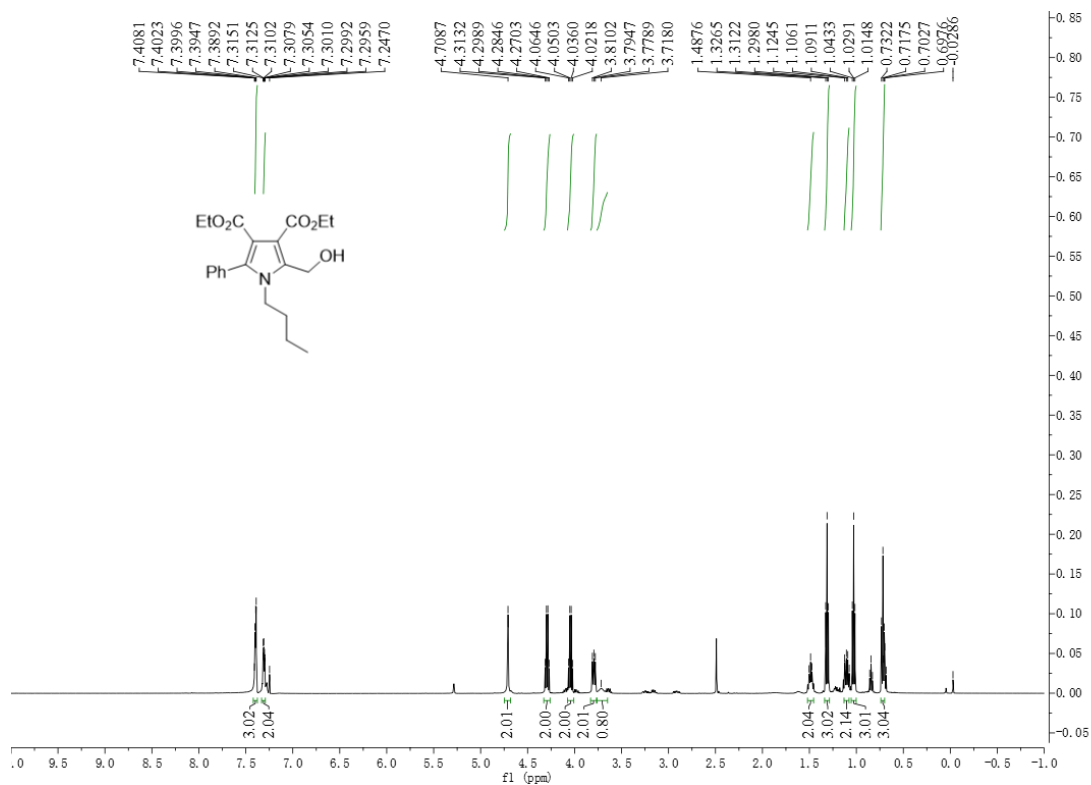

$^{13}\text{C}$  NMR (125 MHz,  $\text{CDCl}_3$ )

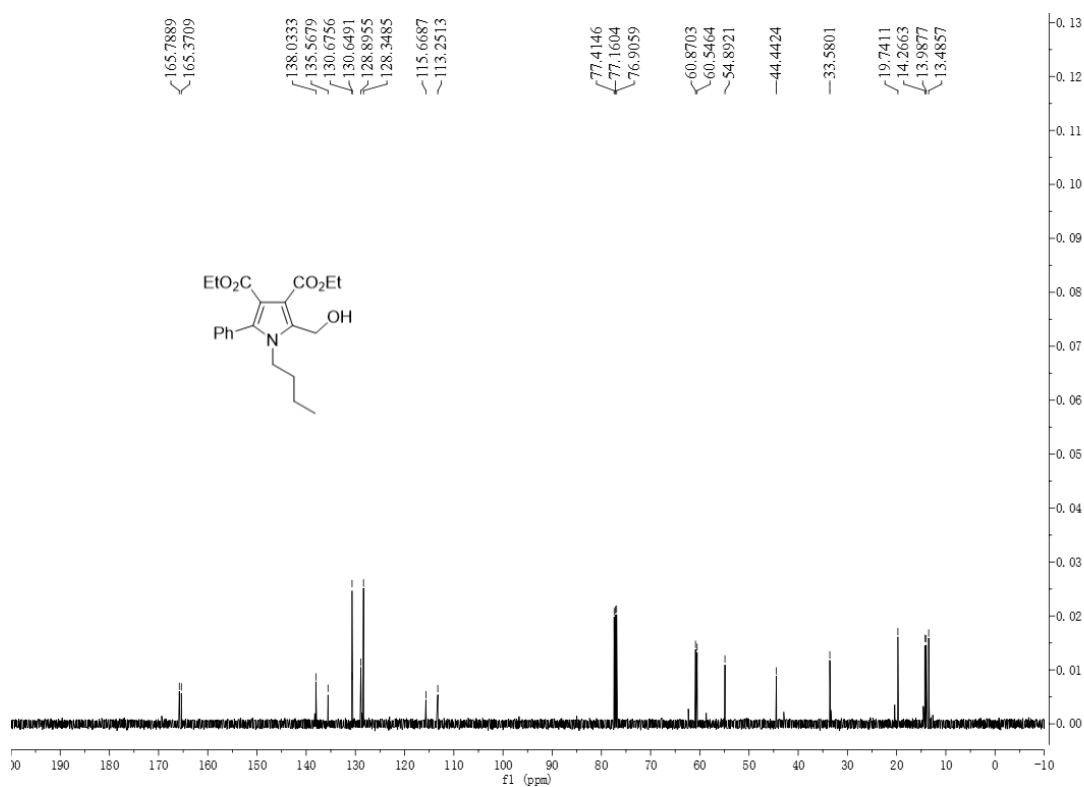

**3-Ethyl 4-pentyl 5-(hydroxymethyl)-1,2-diphenyl-1H-pyrrole-3,4-dicarboxylate (4a)**

$^1\text{H}$  NMR (500 MHz,  $\text{CDCl}_3$ )

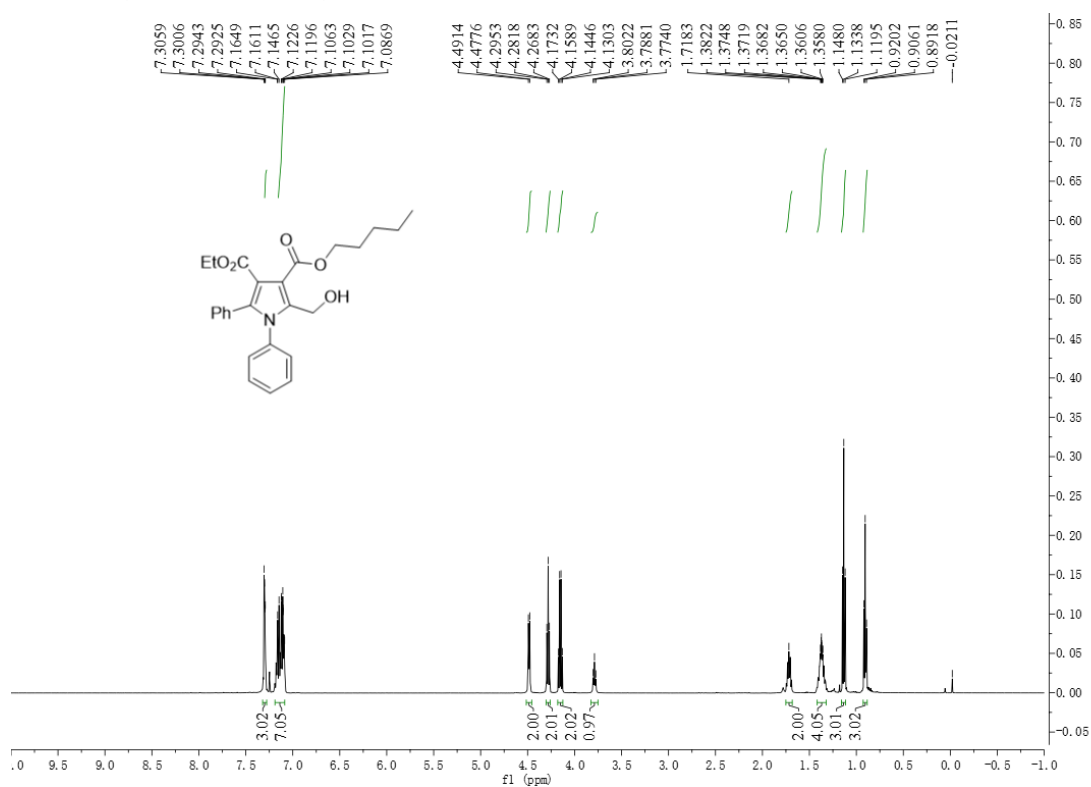

$^{13}\text{C}$  NMR (125 MHz,  $\text{CDCl}_3$ )

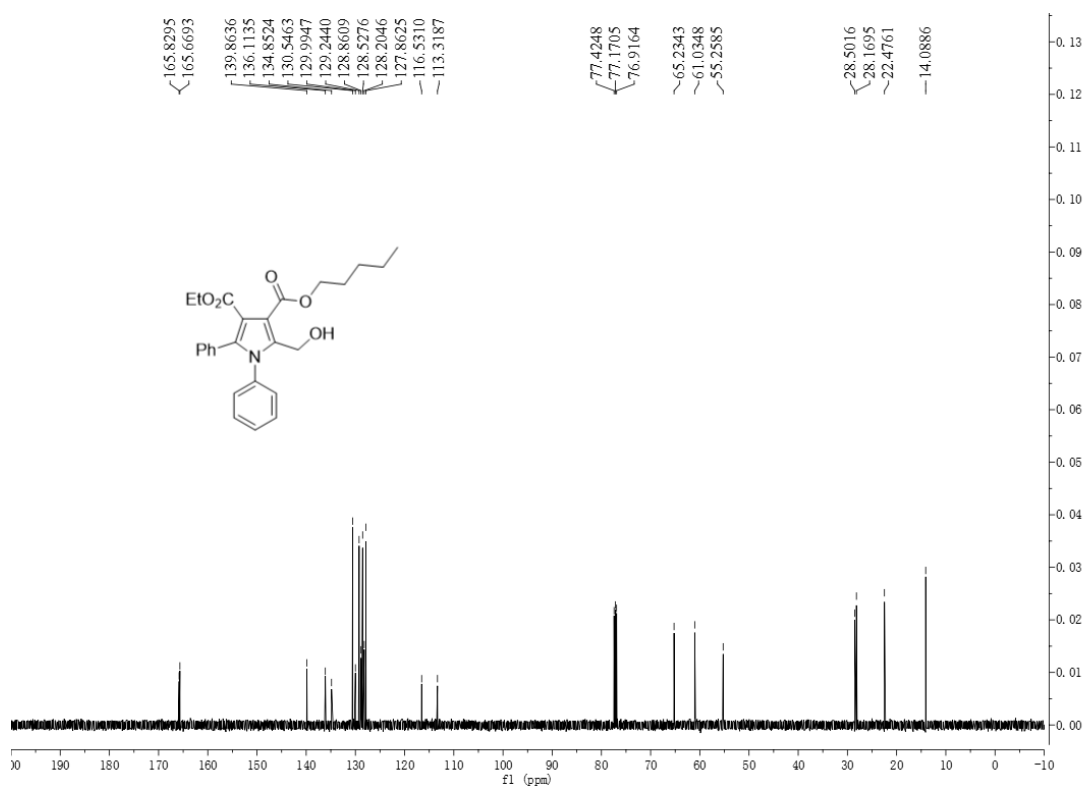

**3-Benzyl 4-ethyl 2-(hydroxymethyl)-1,5-diphenyl-1H-pyrrole-3,4-dicarboxylate (4au)**

$^1\text{H}$  NMR (500 MHz,  $\text{CDCl}_3$ )

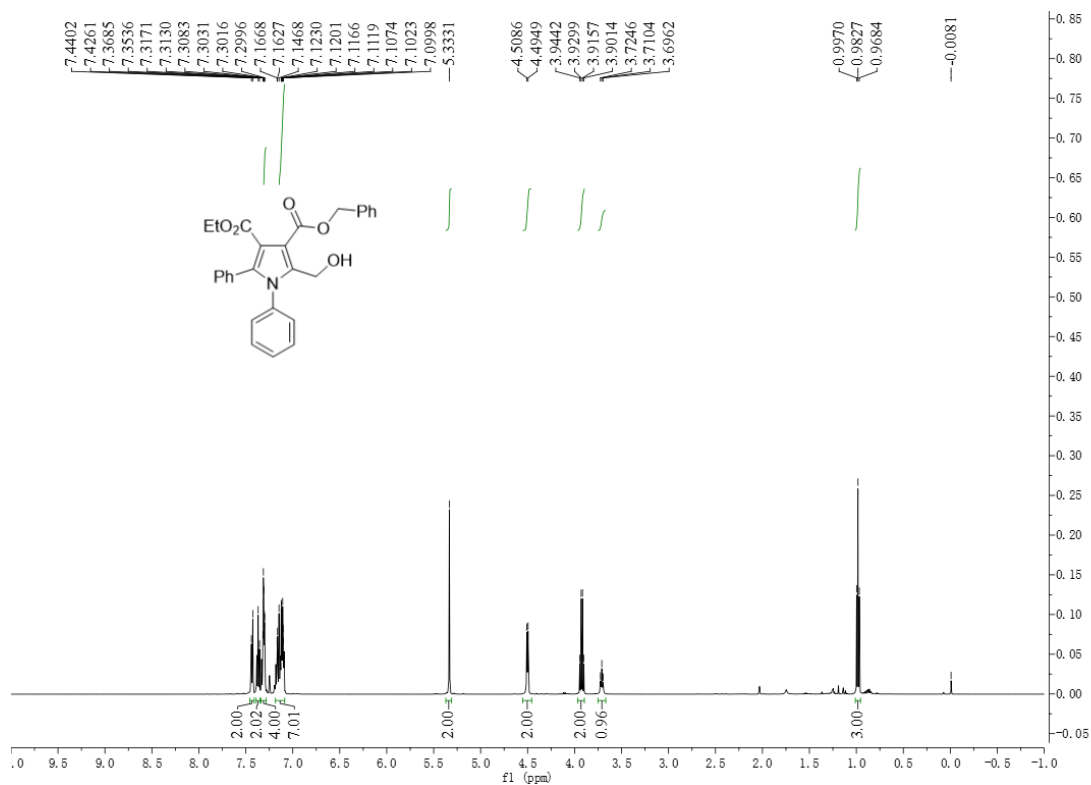

$^{13}\text{C}$  NMR (125 MHz,  $\text{CDCl}_3$ )

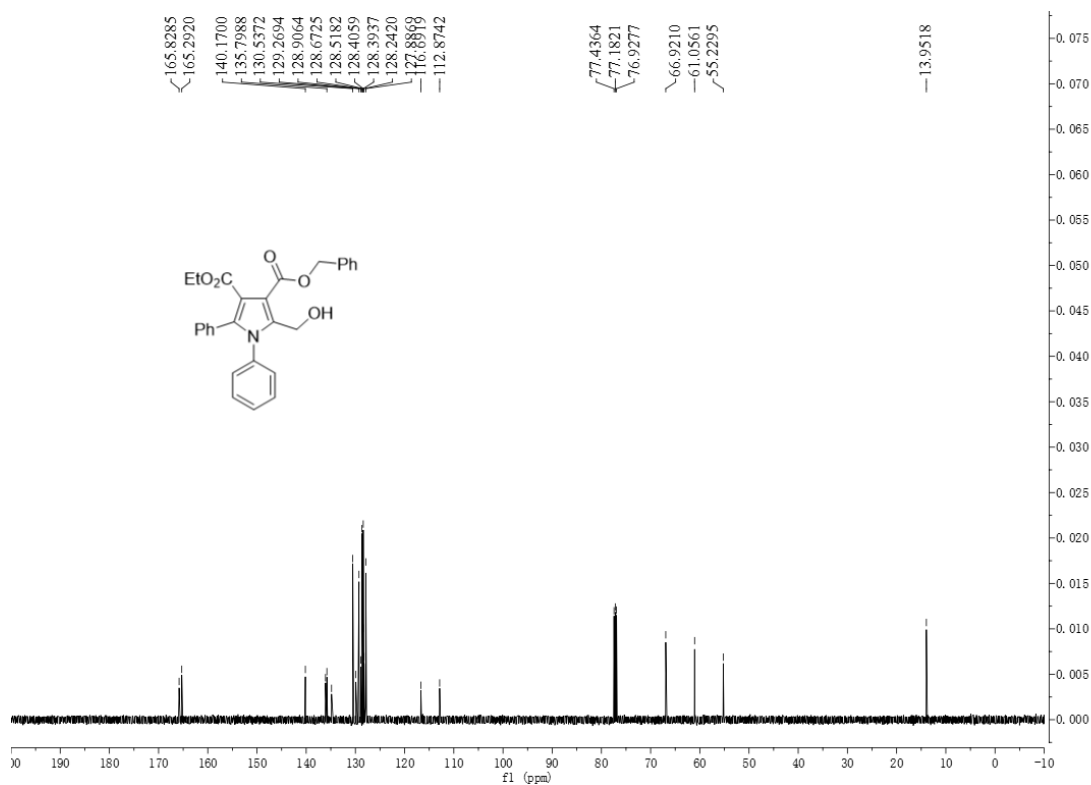

**3-Allyl 4-ethyl 2-(hydroxymethyl)-1,5-diphenyl-1H-pyrrole-3,4-dicarboxylate (4av)**

$^1\text{H}$  NMR (500 MHz,  $\text{CDCl}_3$ )

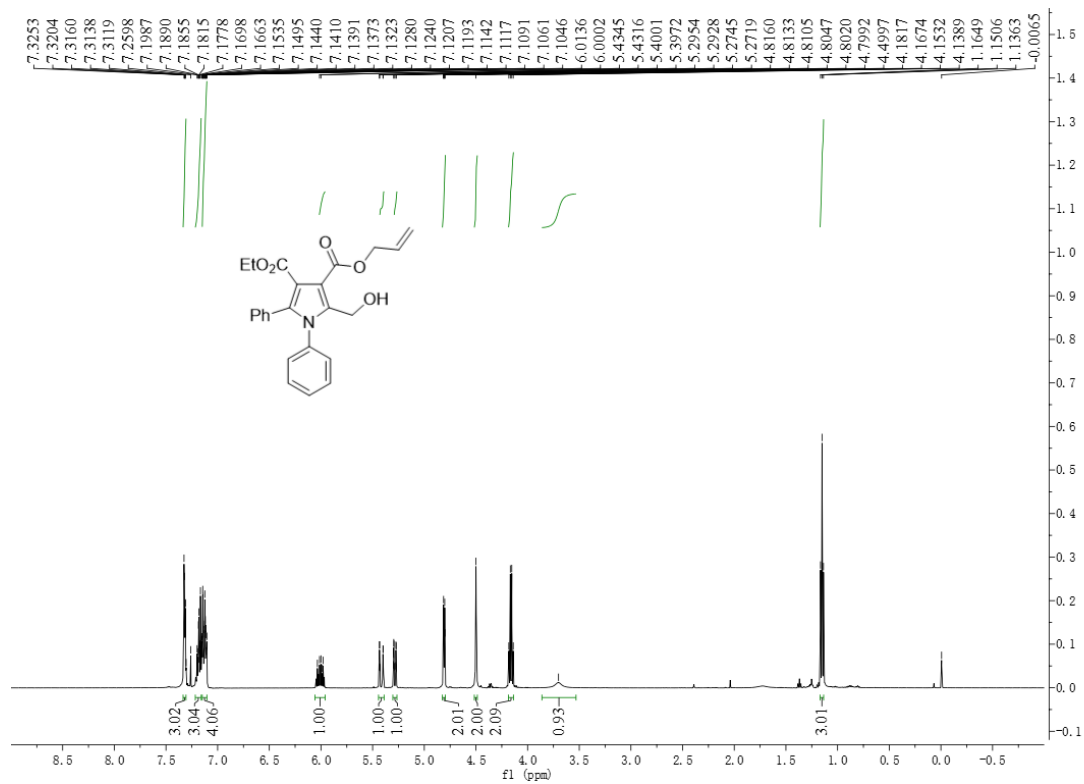

$^{13}\text{C}$  NMR (125 MHz,  $\text{CDCl}_3$ )

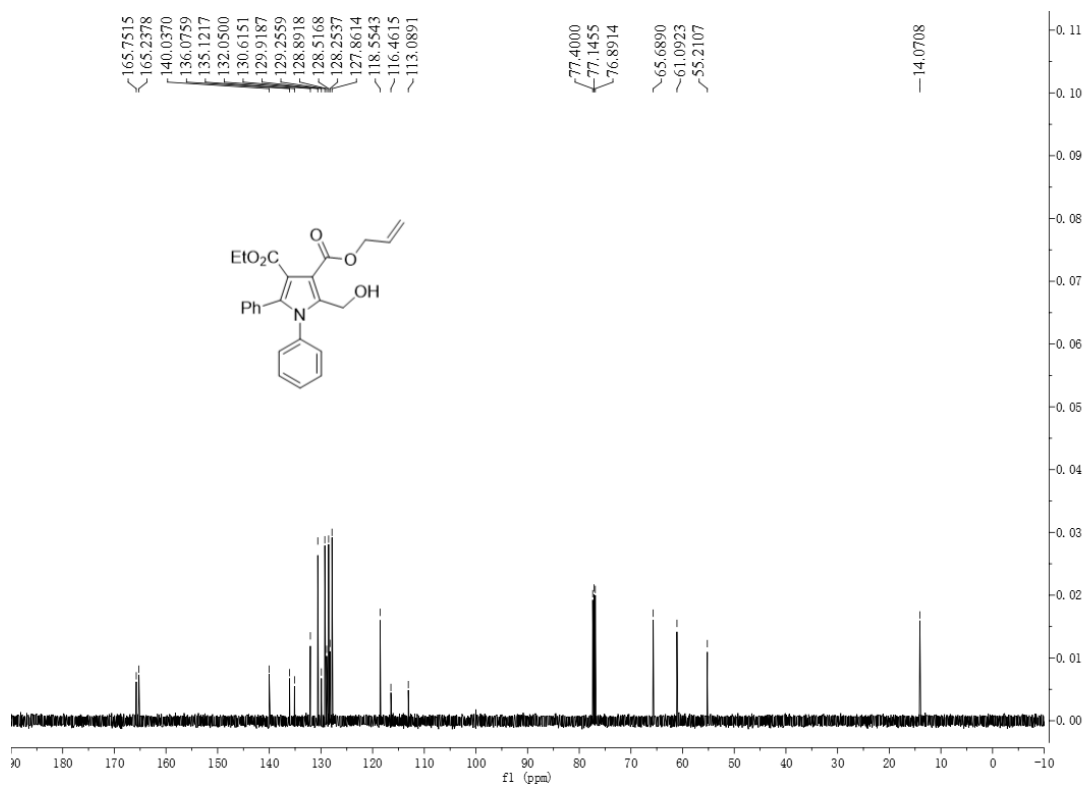

**3-(But-3-yn-1-yl) 4-ethyl 2-(hydroxymethyl)-1,5-diphenyl-1H-pyrrole-3,4-dicarboxylate (4aw)**

$^1\text{H}$  NMR (500 MHz,  $\text{CDCl}_3$ )

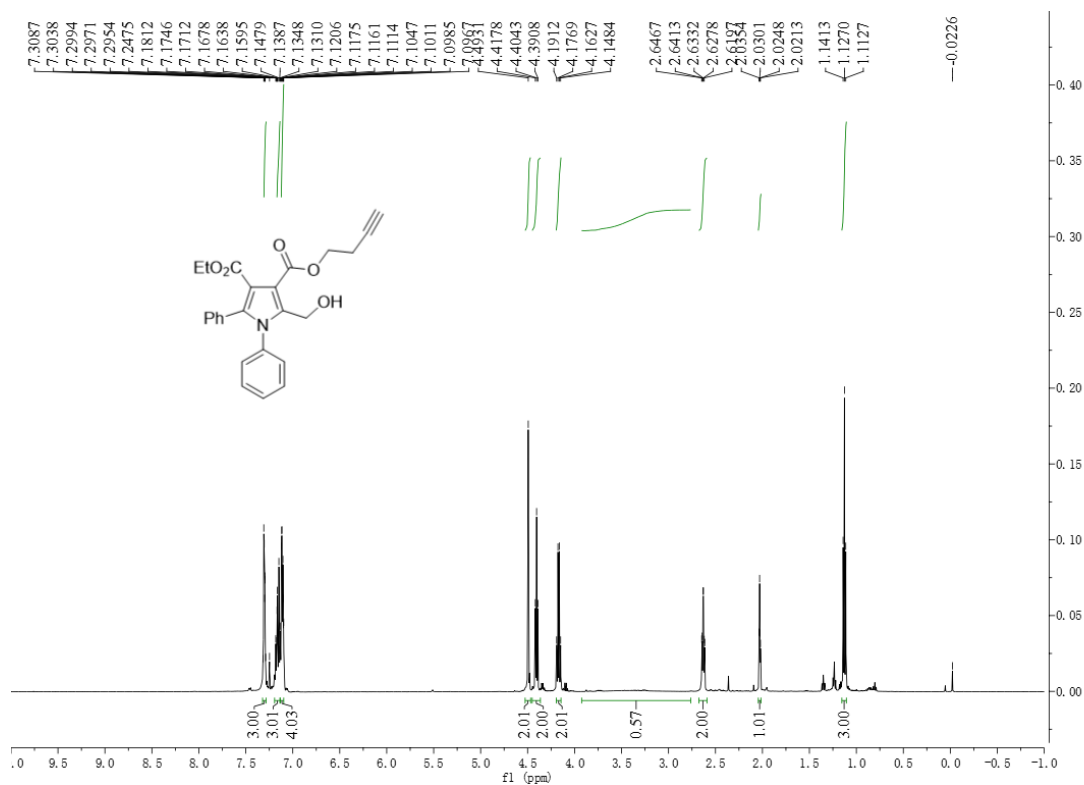



$^{13}\text{C}$  NMR (125 MHz,  $\text{CDCl}_3$ )

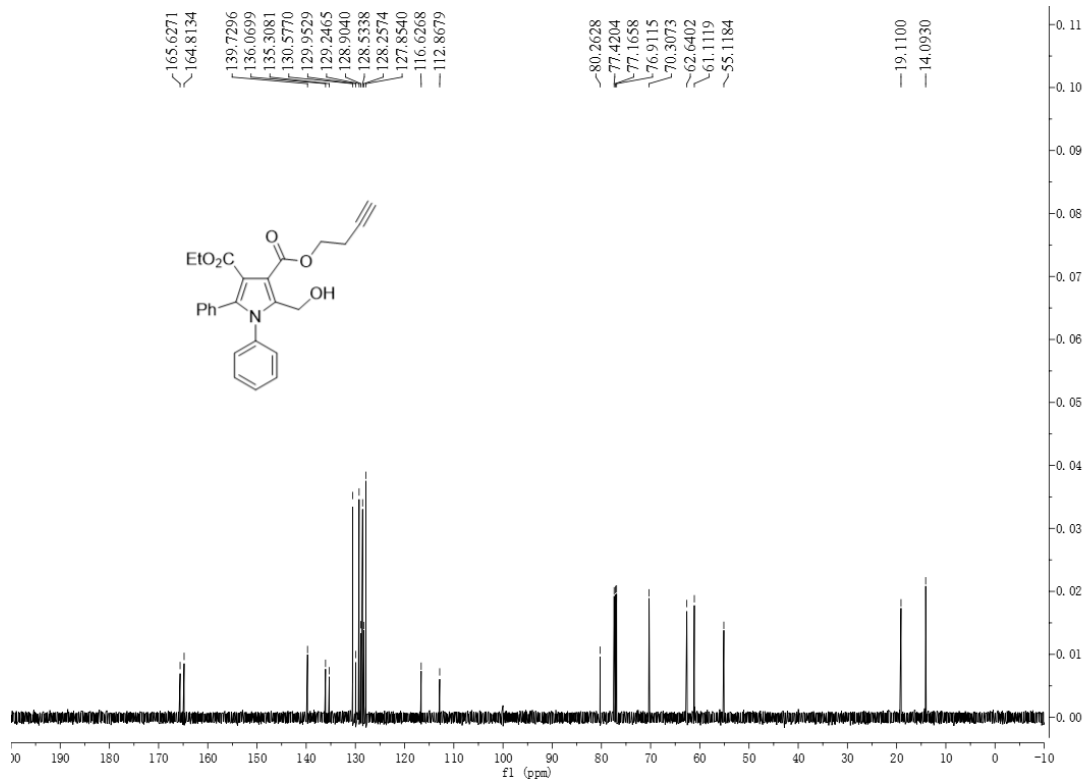

**3-(2-Cyanoethyl) 4-ethyl 2-(hydroxymethyl)-1,5-diphenyl-1H-pyrrole-3,4-dicarboxylate (4ax)**

$^1\text{H}$  NMR (500 MHz,  $\text{CDCl}_3$ )

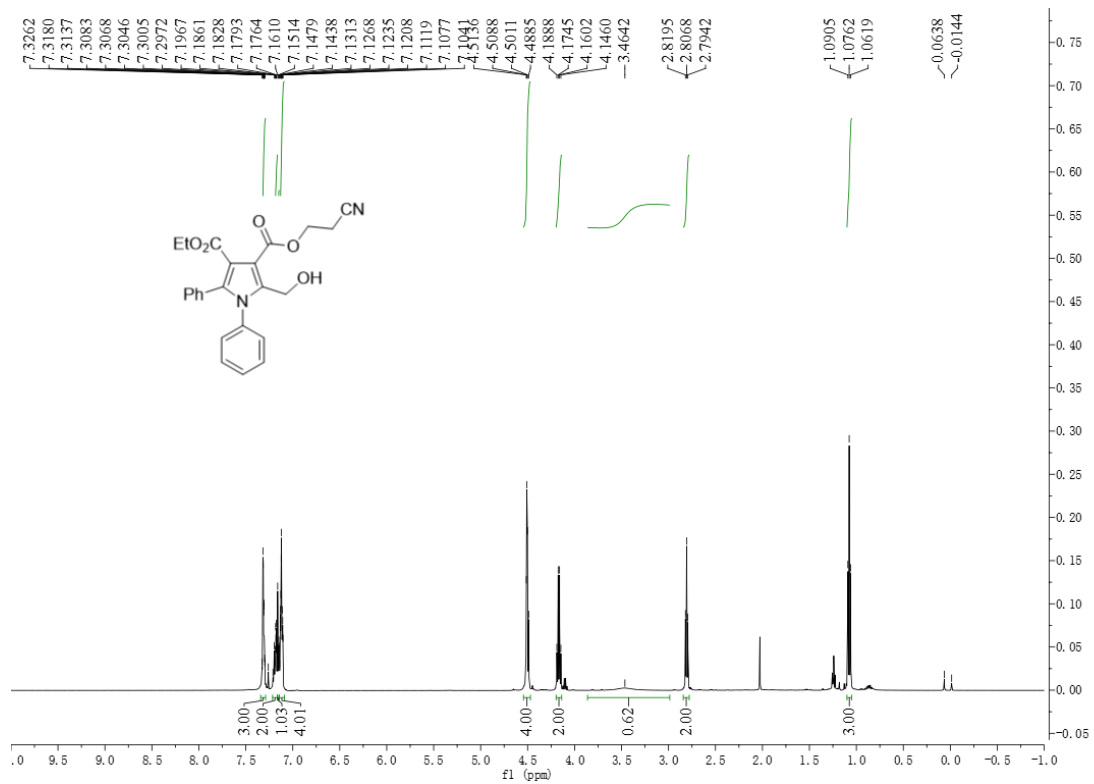

<sup>13</sup>C NMR (125 MHz, CDCl<sub>3</sub>)

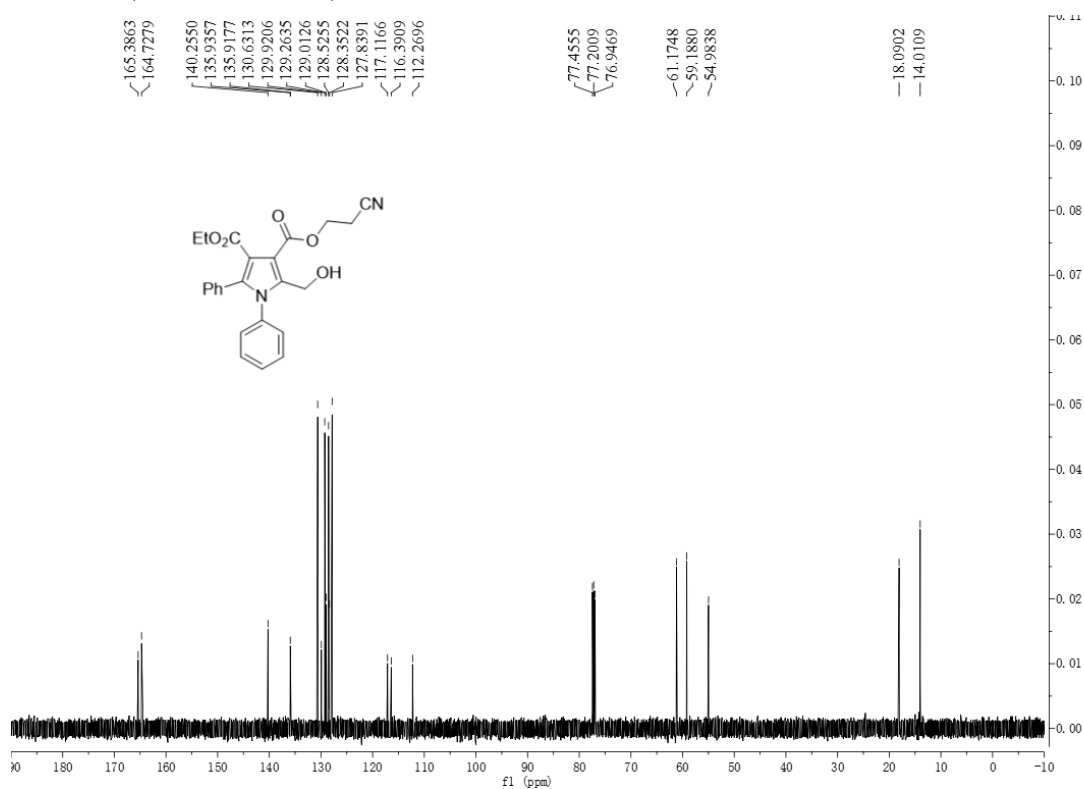

**3-Ethyl 4-methyl 5-(1-hydroxyethyl)-1,2-diphenyl-1H-pyrrole-3,4-dicarboxylate (4ay)**

<sup>1</sup>H NMR (500 MHz, CDCl<sub>3</sub>)

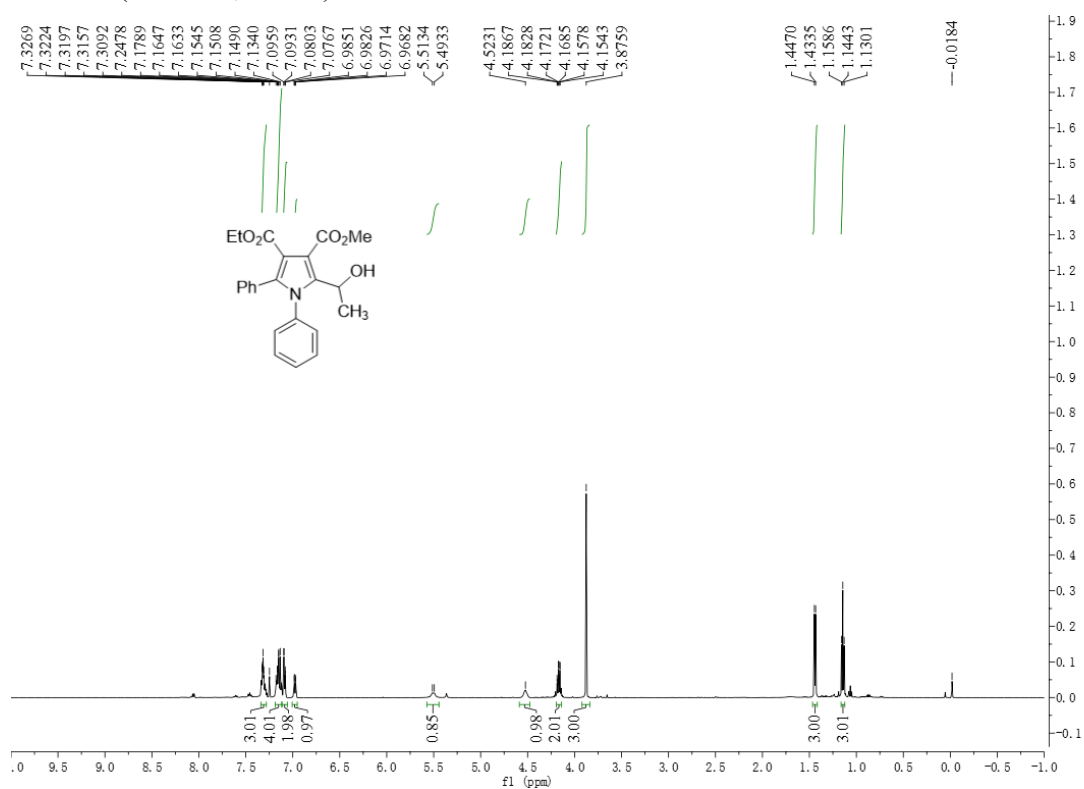

$^{13}\text{C}$  NMR (125 MHz,  $\text{CDCl}_3$ )

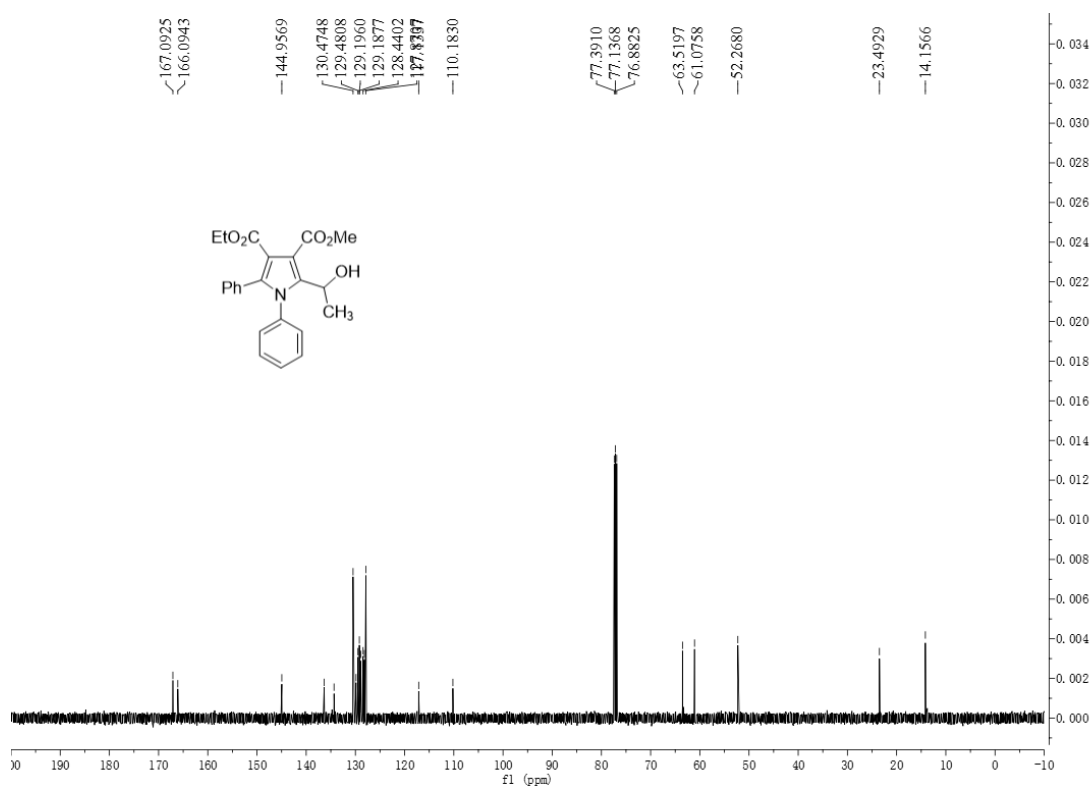

**Diethyl 2-(1-hydroxypropyl)-1,5-diphenyl-1*H*-pyrrole-3,4-dicarboxylate (4a)**

$^1\text{H}$  NMR (500 MHz,  $\text{CDCl}_3$ )

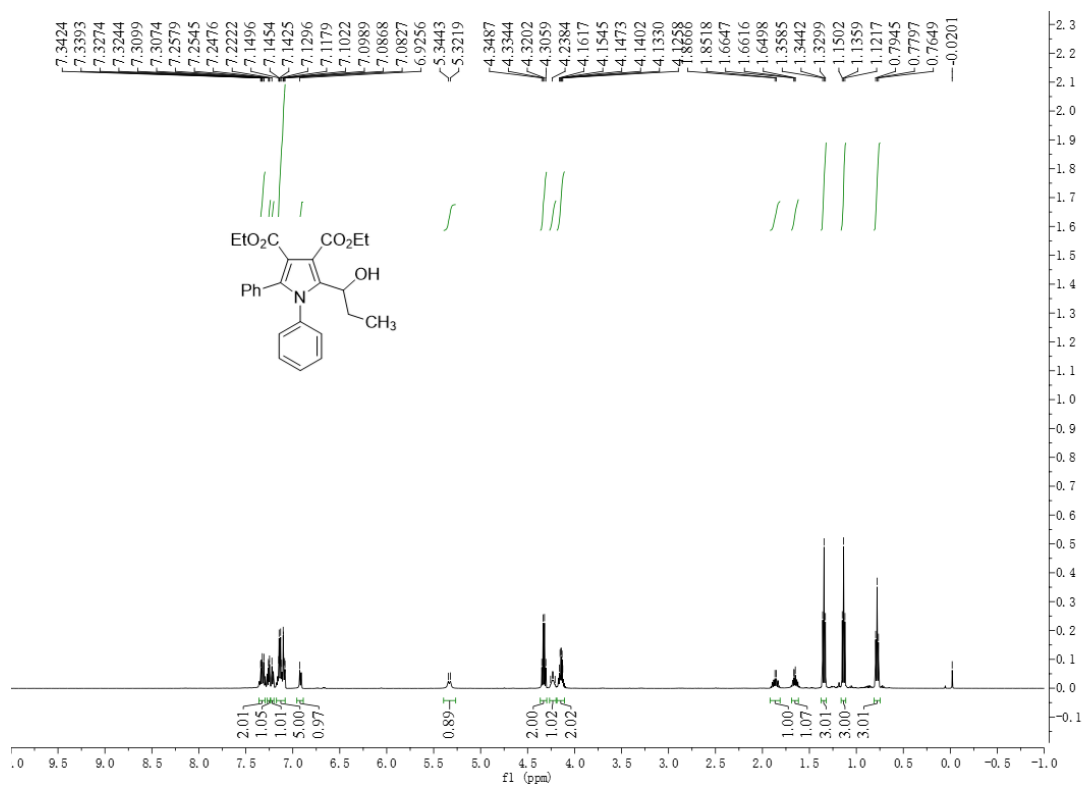

$^{13}\text{C}$  NMR (125 MHz,  $\text{CDCl}_3$ )

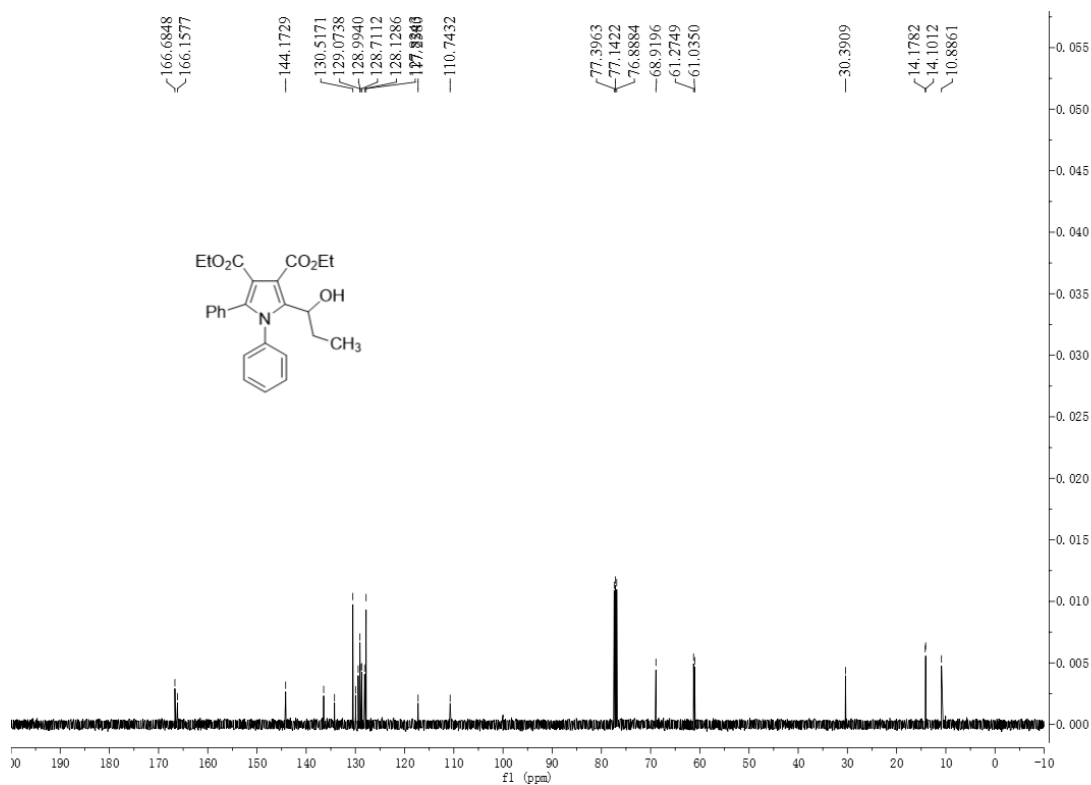

Diethyl 2-(ethoxymethyl)-1,5-diphenyl-1H-pyrrole-3,4-dicarboxylate (5aa)

$^1\text{H}$  NMR (500 MHz,  $\text{CDCl}_3$ )

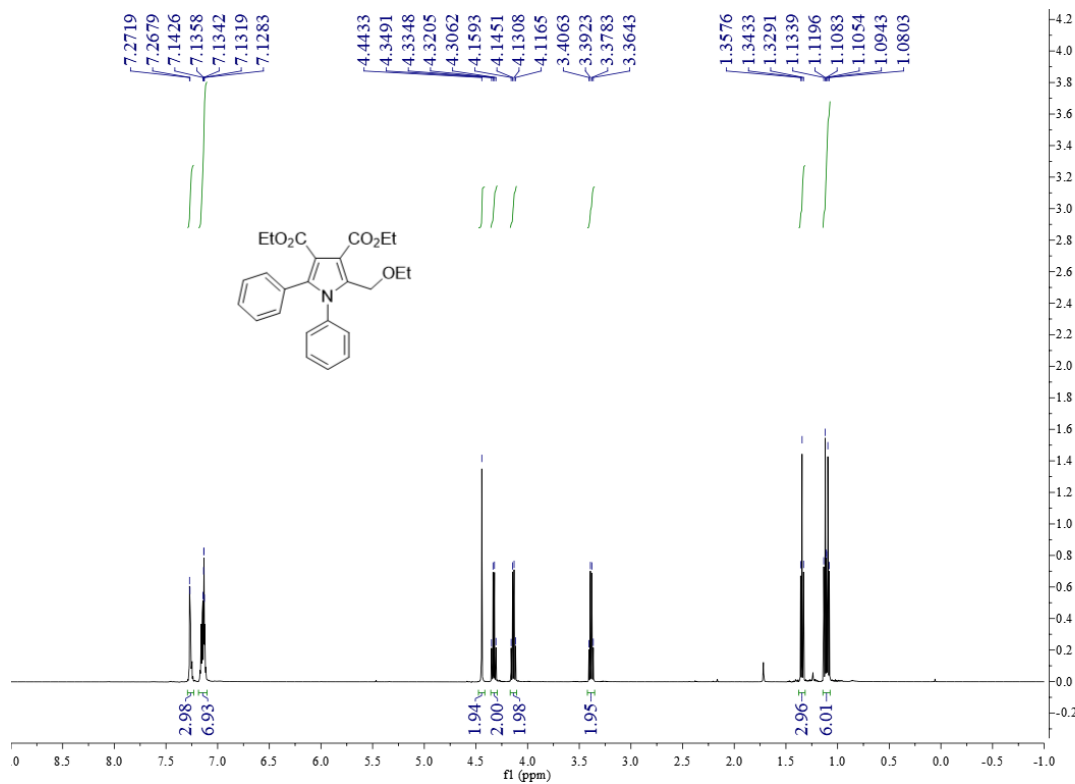

$^{13}\text{C}$  NMR (125 MHz,  $\text{CDCl}_3$ )

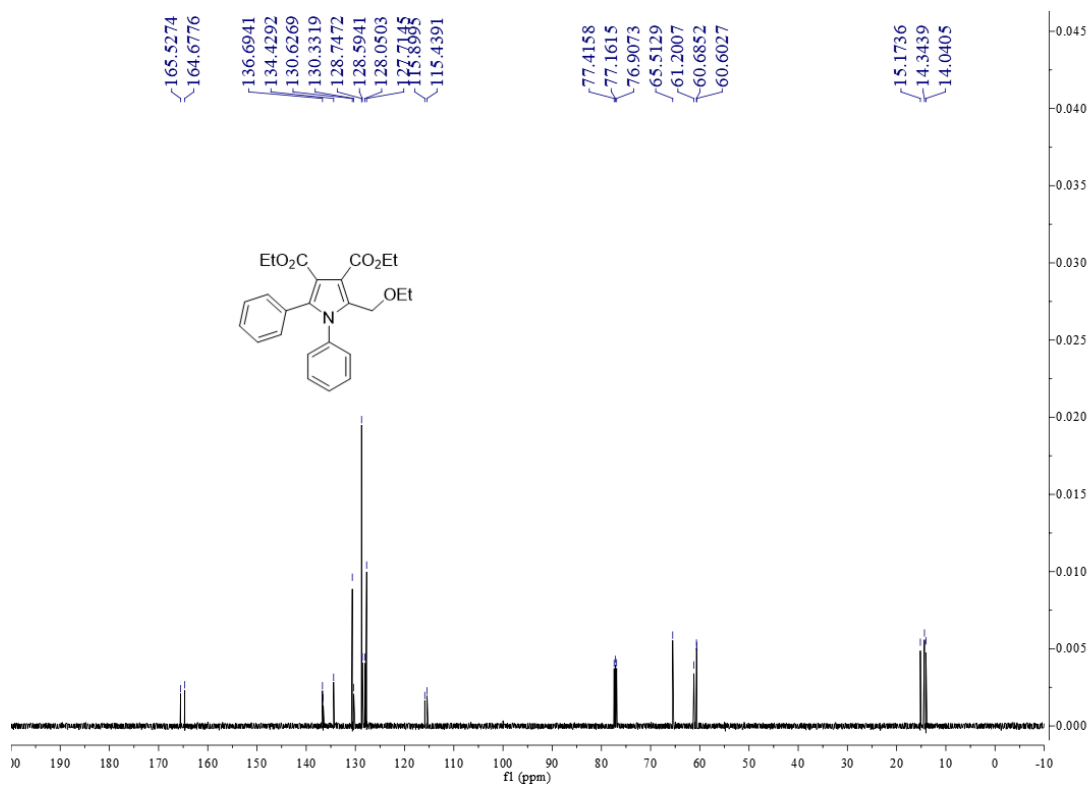

**Diethyl 2-(ethoxymethyl)-5-(4-fluorophenyl)-1-phenyl-1H-pyrrole-3,4-dicarboxylate (5ba)**

$^1\text{H}$  NMR (500 MHz,  $\text{CDCl}_3$ )

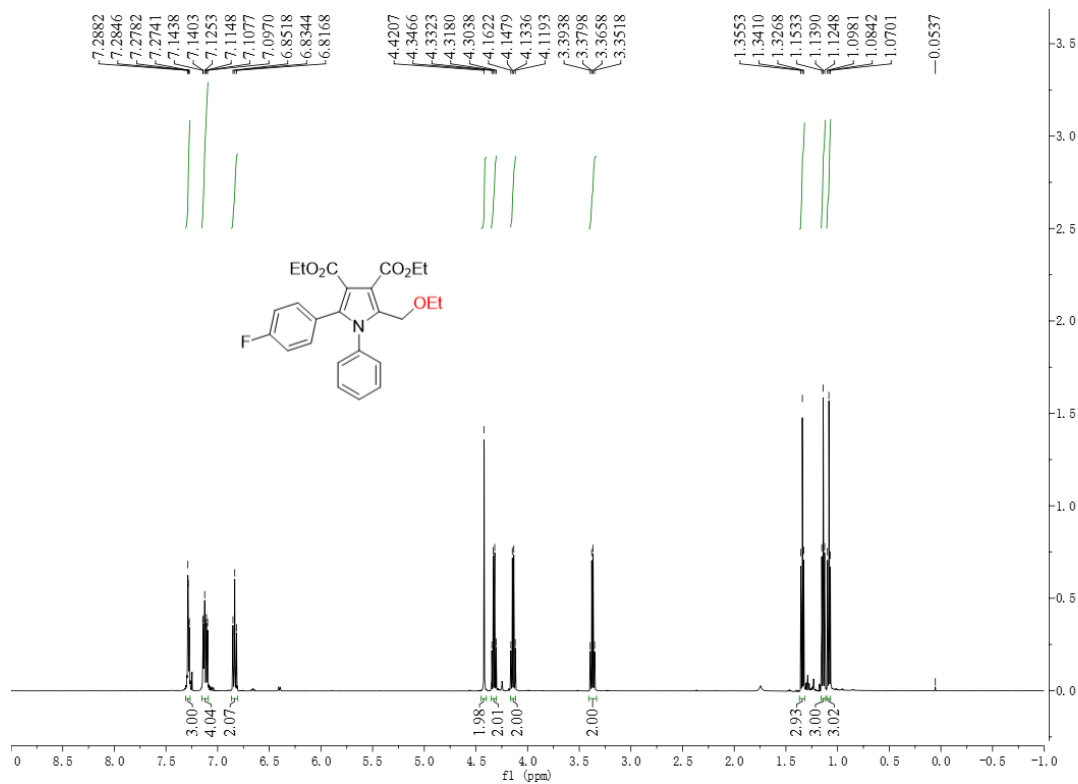

$^{13}\text{C}$  NMR (125 MHz,  $\text{CDCl}_3$ )

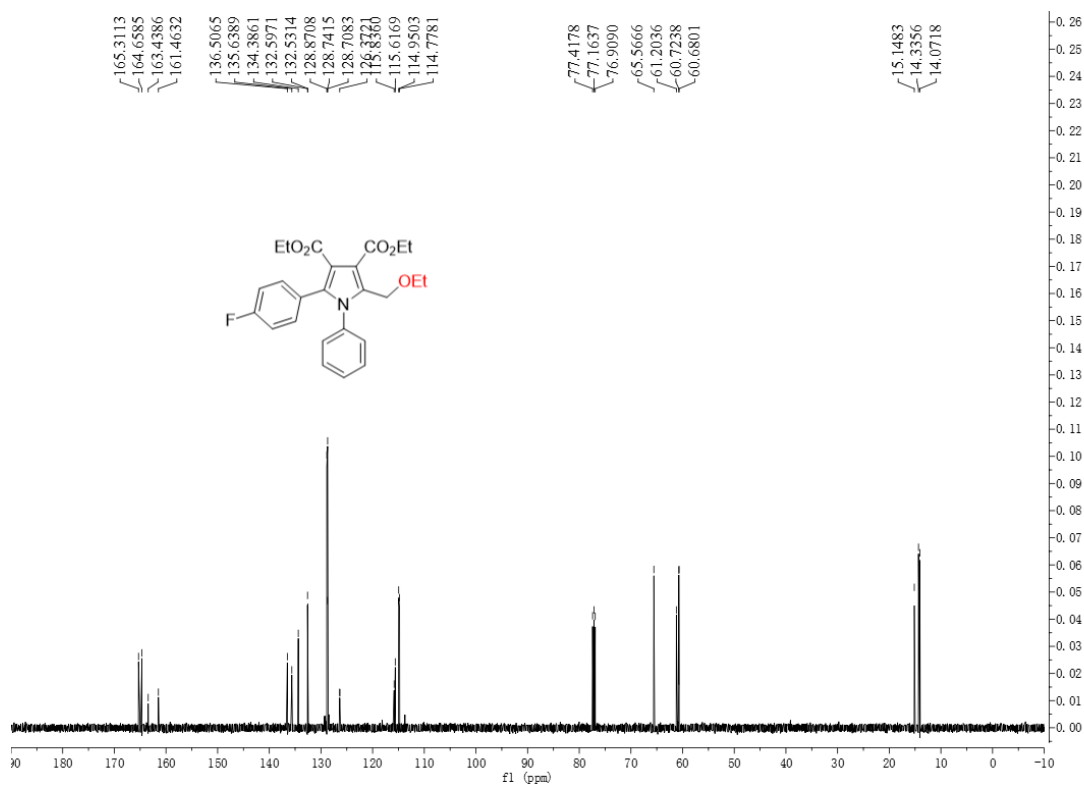

Diethyl 2-(4-bromophenyl)-5-(ethoxymethyl)-1-phenyl-1H-pyrrole-3,4-dicarboxylate (5ca)

$^1\text{H}$  NMR (500 MHz,  $\text{CDCl}_3$ )

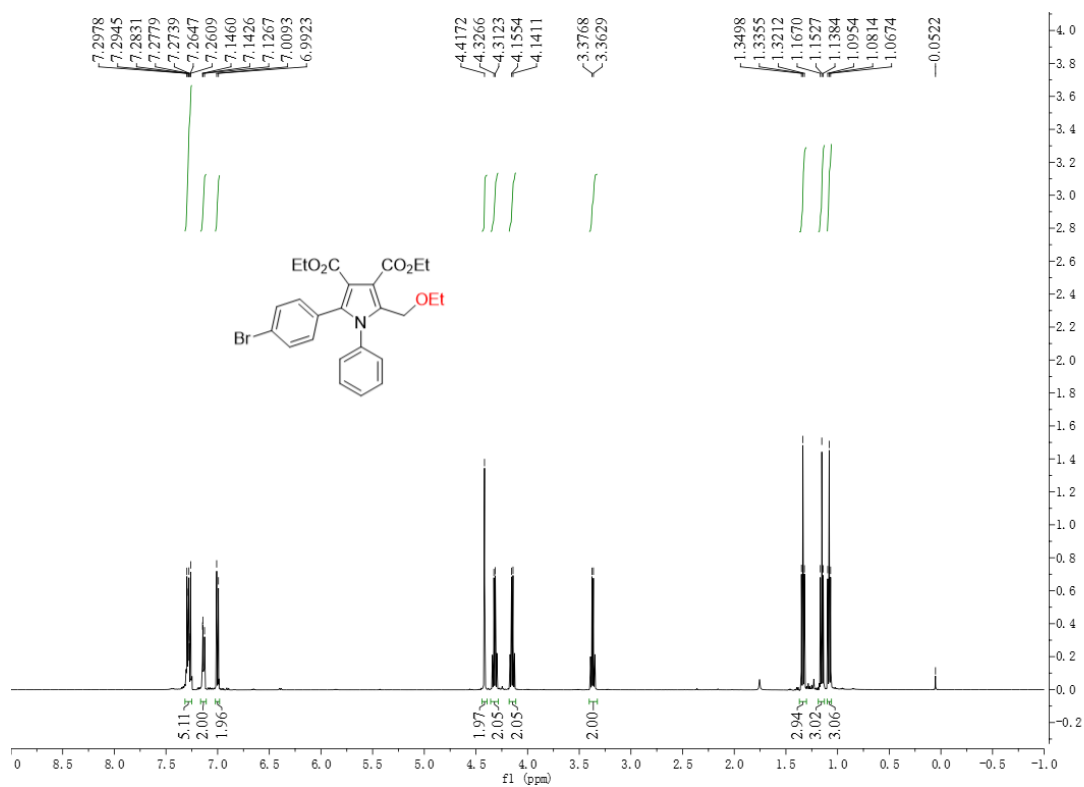

$^{13}\text{C}$  NMR (125 MHz,  $\text{CDCl}_3$ )

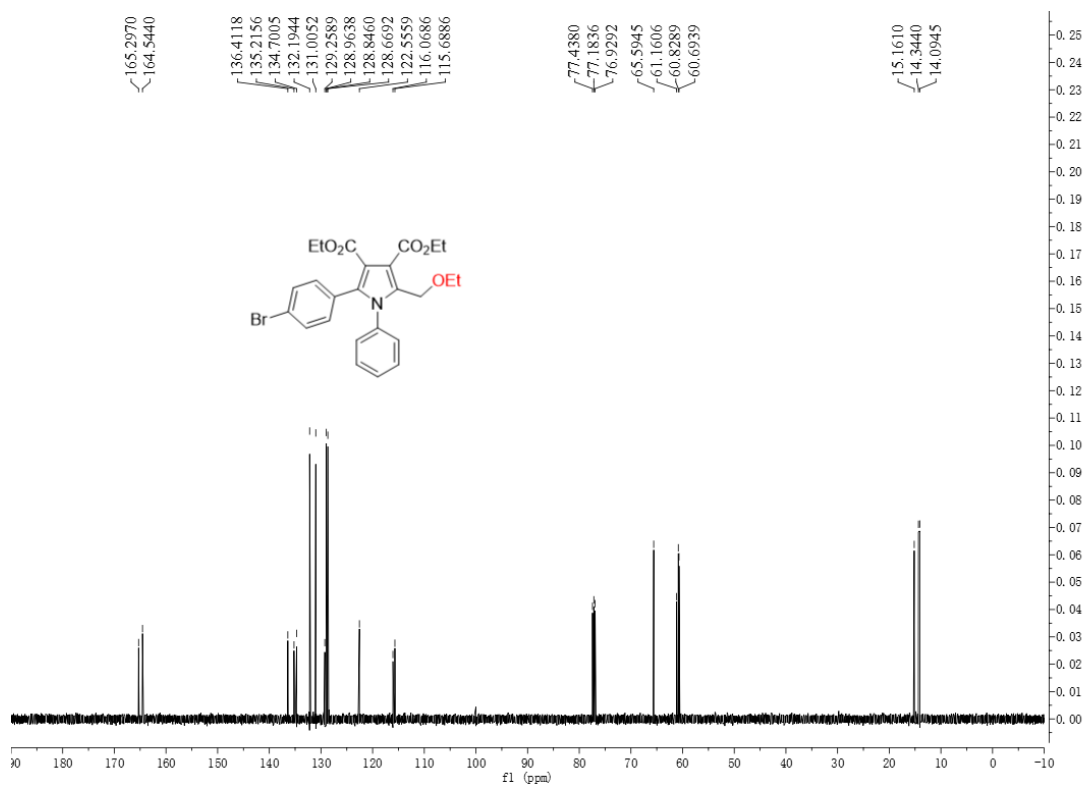

Diethyl 2-(ethoxymethyl)-1-phenyl-5-(*p*-tolyl)-1H-pyrrole-3,4-dicarboxylate (5da)

$^1\text{H}$  NMR (500 MHz,  $\text{CDCl}_3$ )

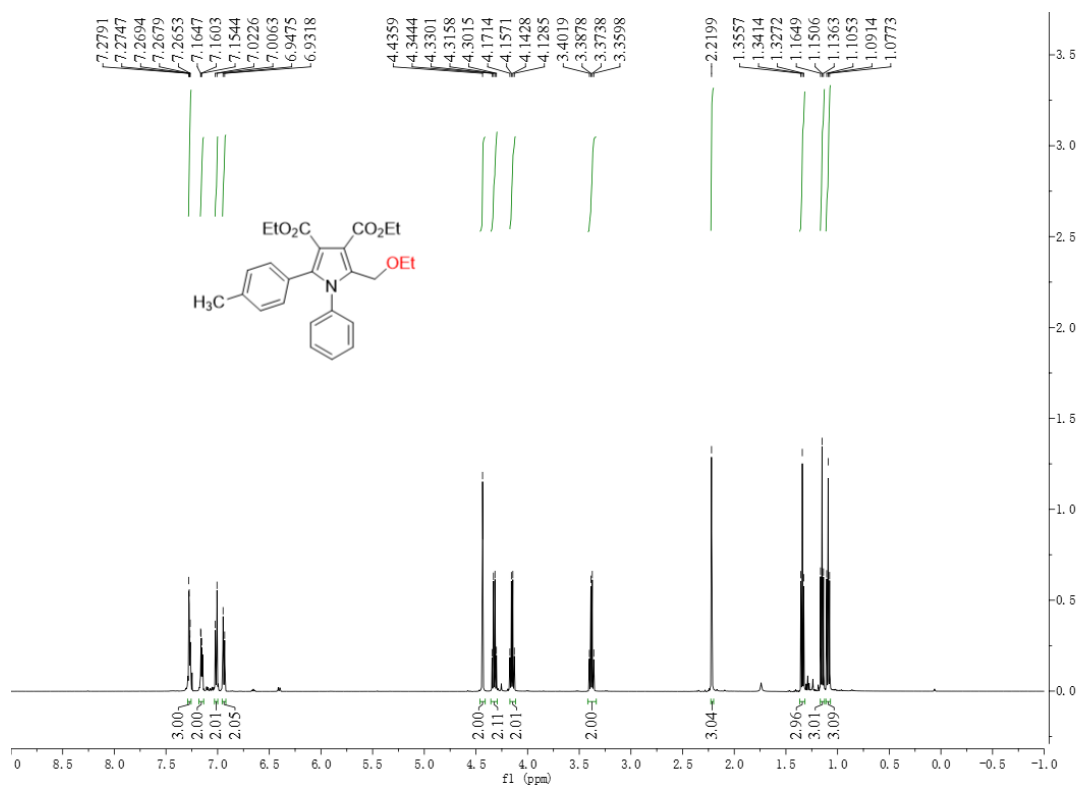

$^{13}\text{C}$  NMR (125 MHz,  $\text{CDCl}_3$ )

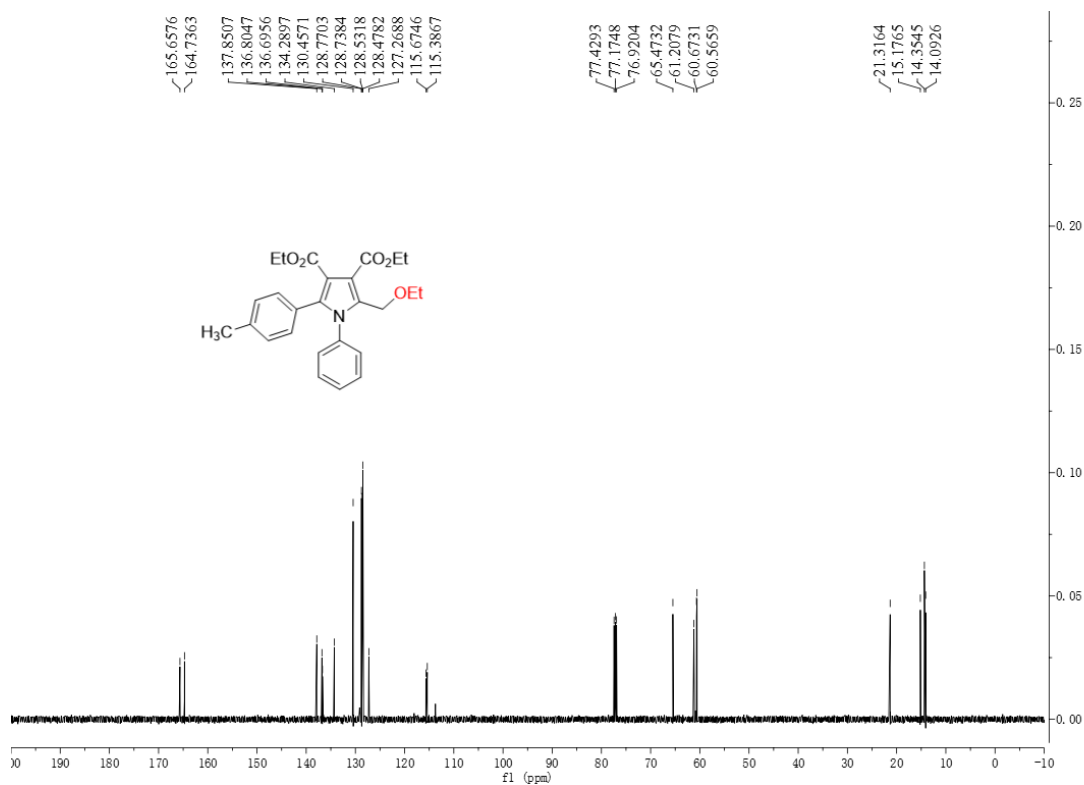

Diethyl 2-(2-bromophenyl)-5-(ethoxymethyl)-1-phenyl-1H-pyrrole-3,4-dicarboxylate (5ea)

$^1\text{H}$  NMR (500 MHz,  $\text{CDCl}_3$ )

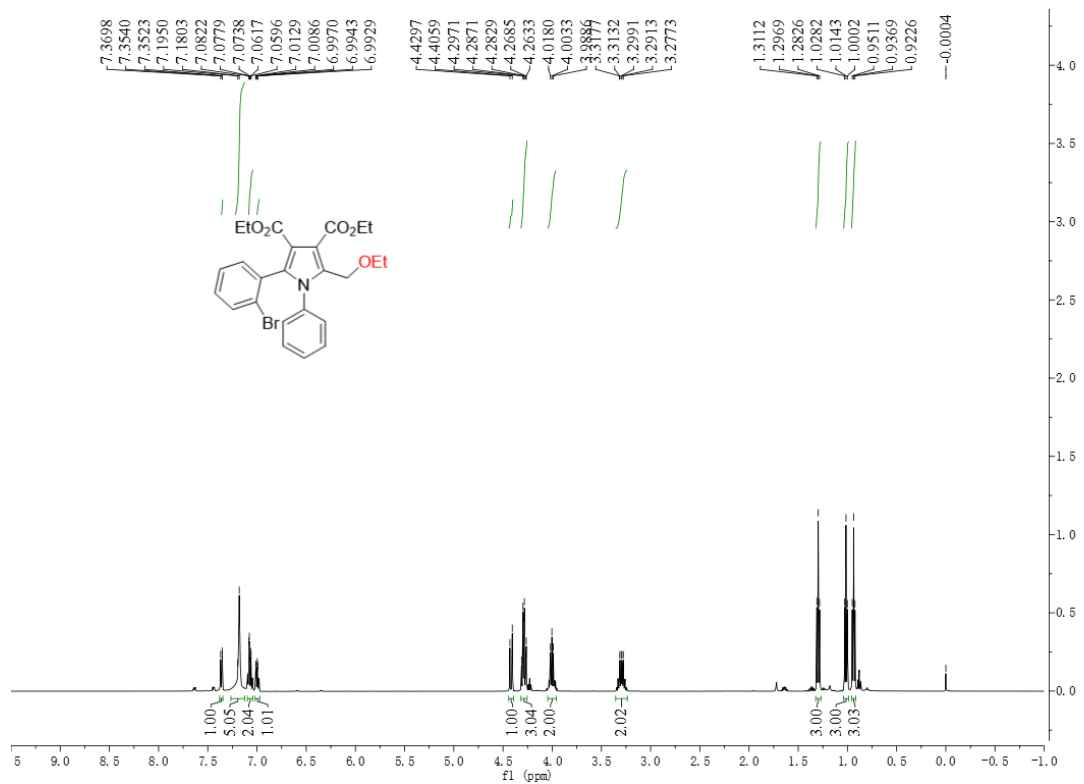



$^{13}\text{C}$  NMR (125 MHz,  $\text{CDCl}_3$ )

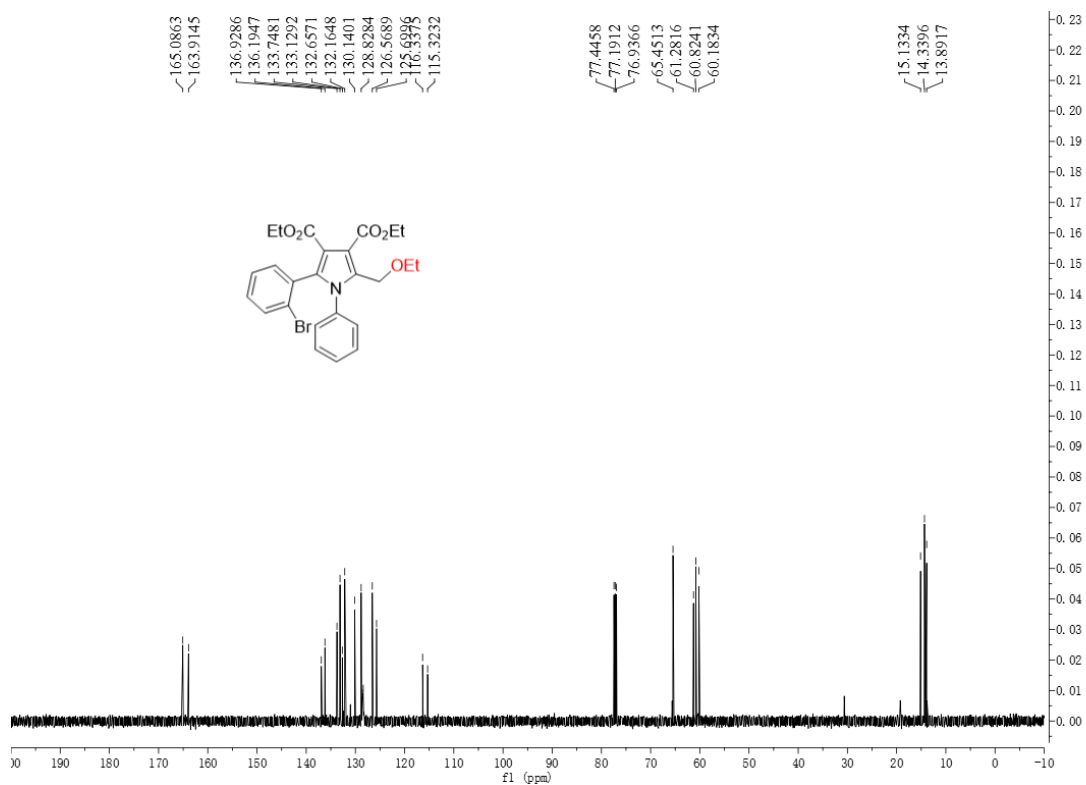

Diethyl 2-(3-bromophenyl)-5-(ethoxymethyl)-1-phenyl-1H-pyrrole-3,4-dicarboxylate (5fa)

$^1\text{H}$  NMR (500 MHz,  $\text{CDCl}_3$ )

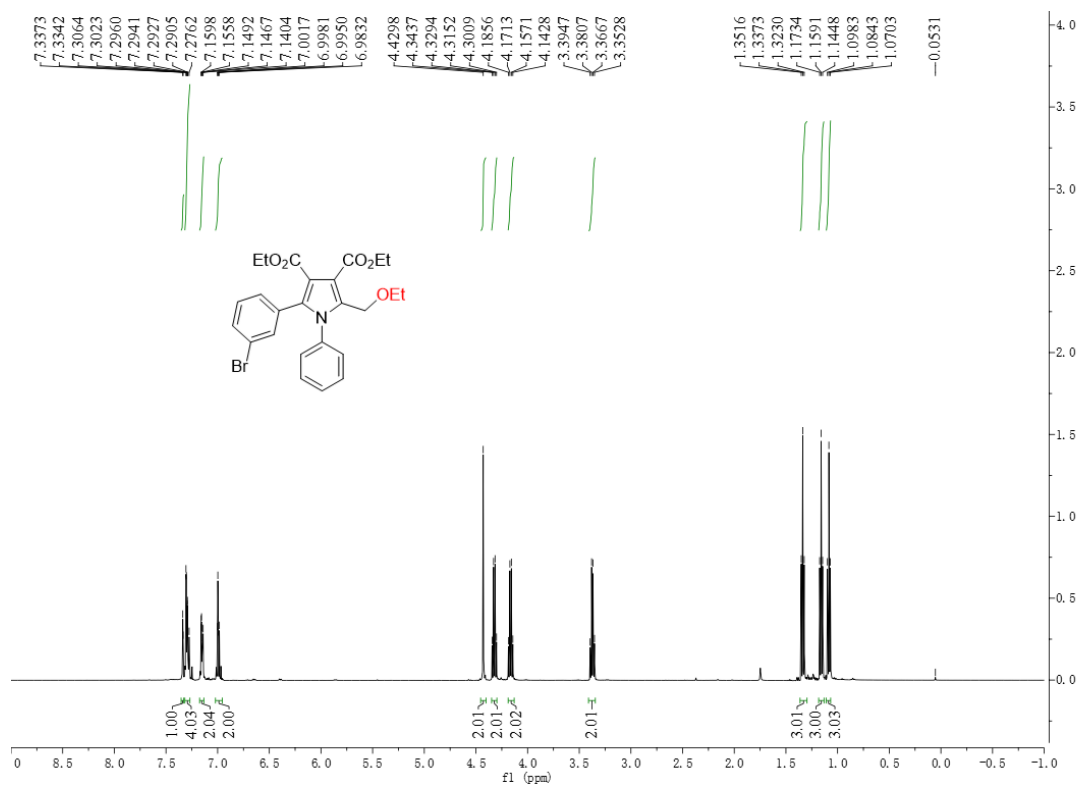

$^{13}\text{C}$  NMR (125 MHz,  $\text{CDCl}_3$ )

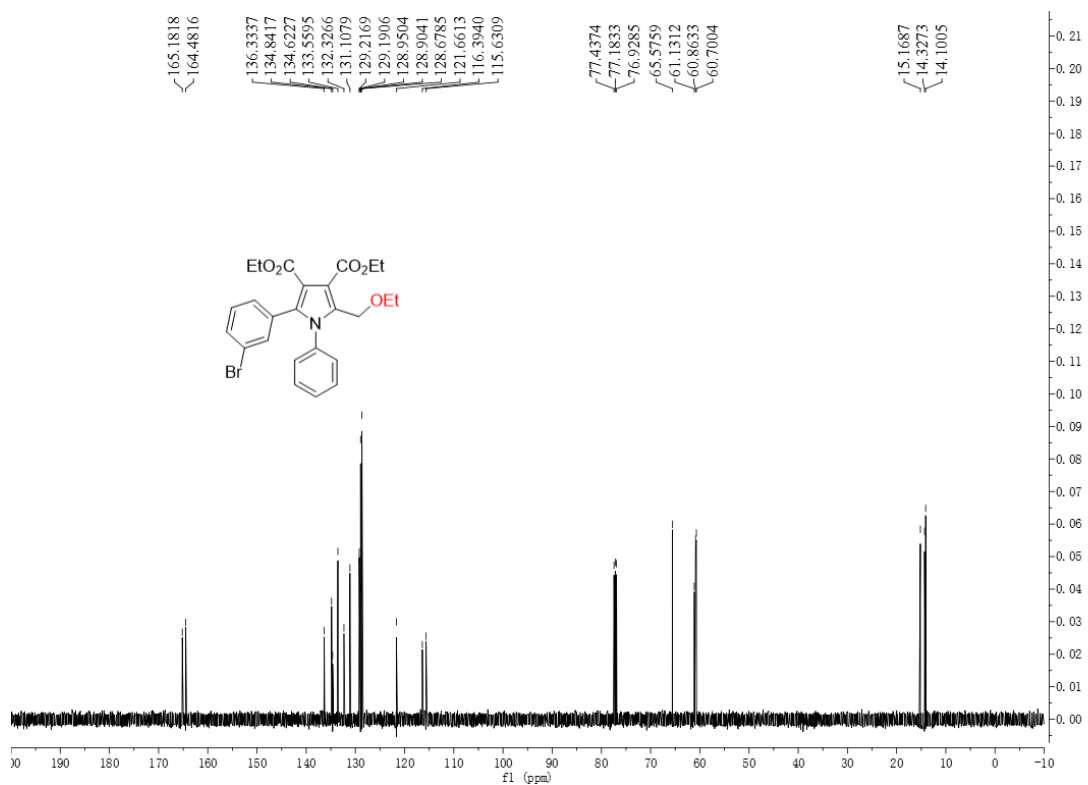

Diethyl 2-(ethoxymethyl)-5-(naphthalen-2-yl)-1-phenyl-1H-pyrrole-3,4-dicarboxylate (5g)

$^1\text{H}$  NMR (500 MHz,  $\text{CDCl}_3$ )

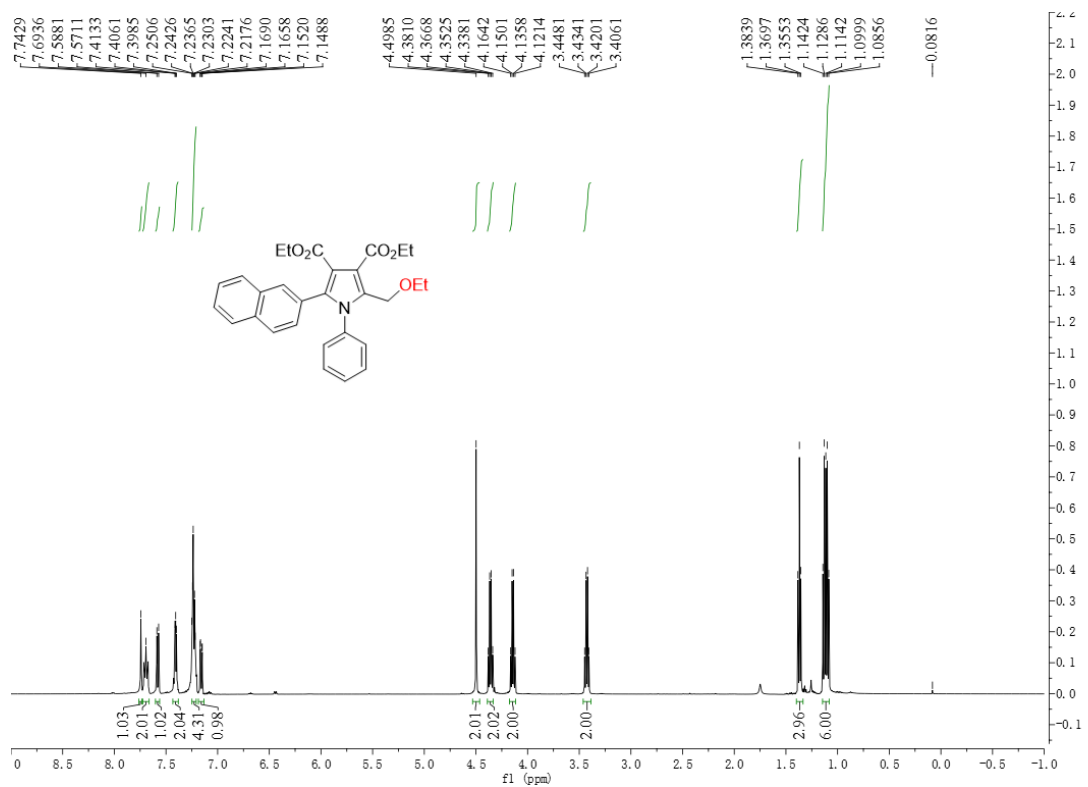

$^{13}\text{C}$  NMR (125 MHz,  $\text{CDCl}_3$ )

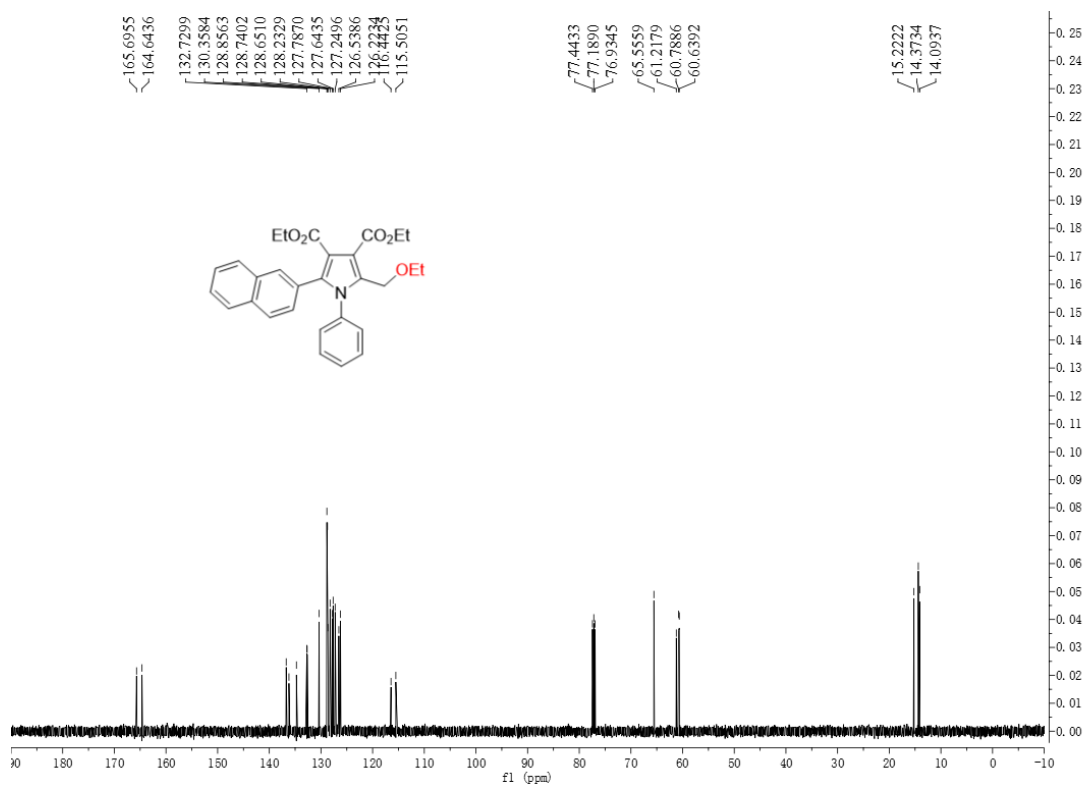

**Diethyl 2-(ethoxymethyl)-5-methyl-1-phenyl-1H-pyrrole-3,4-dicarboxylate (5ha)**

$^1\text{H}$  NMR (500 MHz,  $\text{CDCl}_3$ )

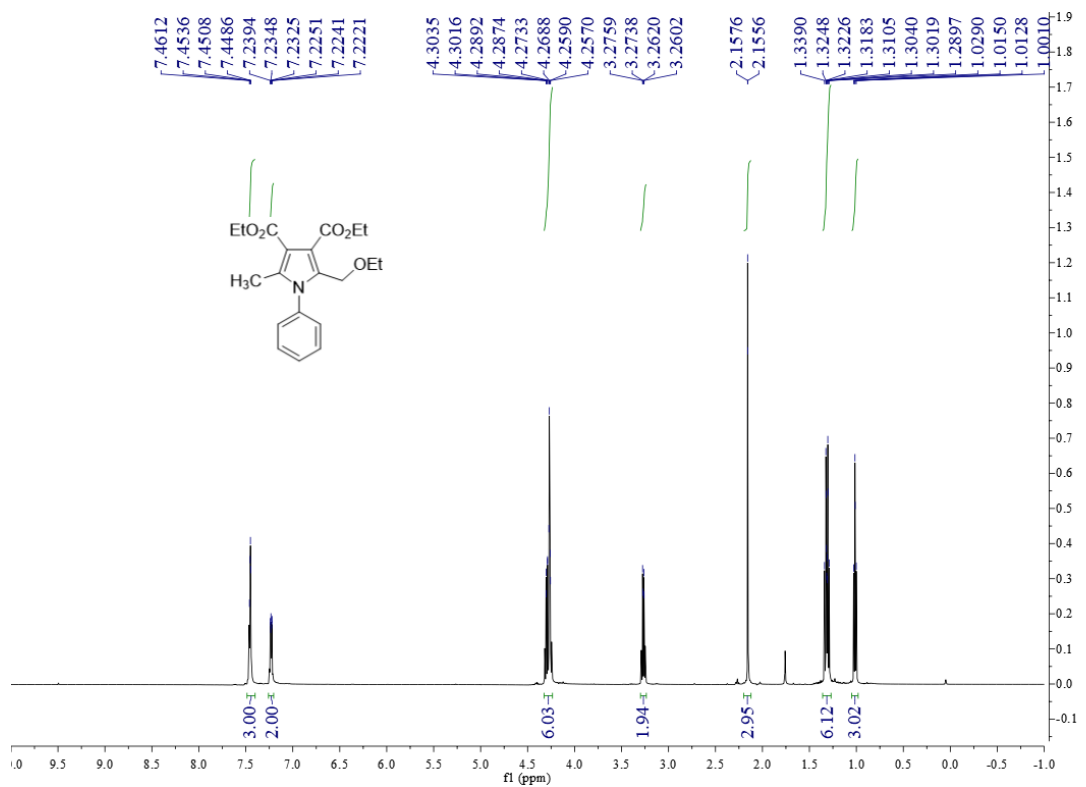

$^{13}\text{C}$  NMR (125 MHz,  $\text{CDCl}_3$ )

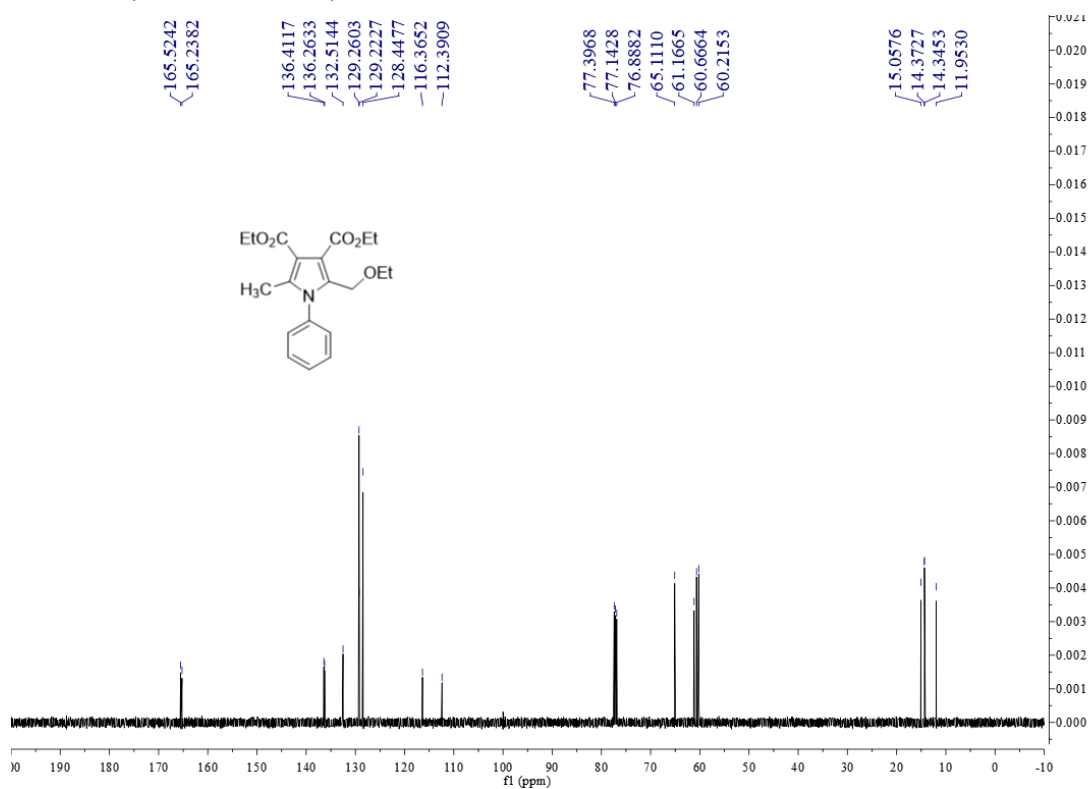

**Diethyl 2-(ethoxymethyl)-1-phenyl-5-propyl-1H-pyrrole-3,4-dicarboxylate (5ia)**

$^1\text{H}$  NMR (500 MHz,  $\text{CDCl}_3$ )

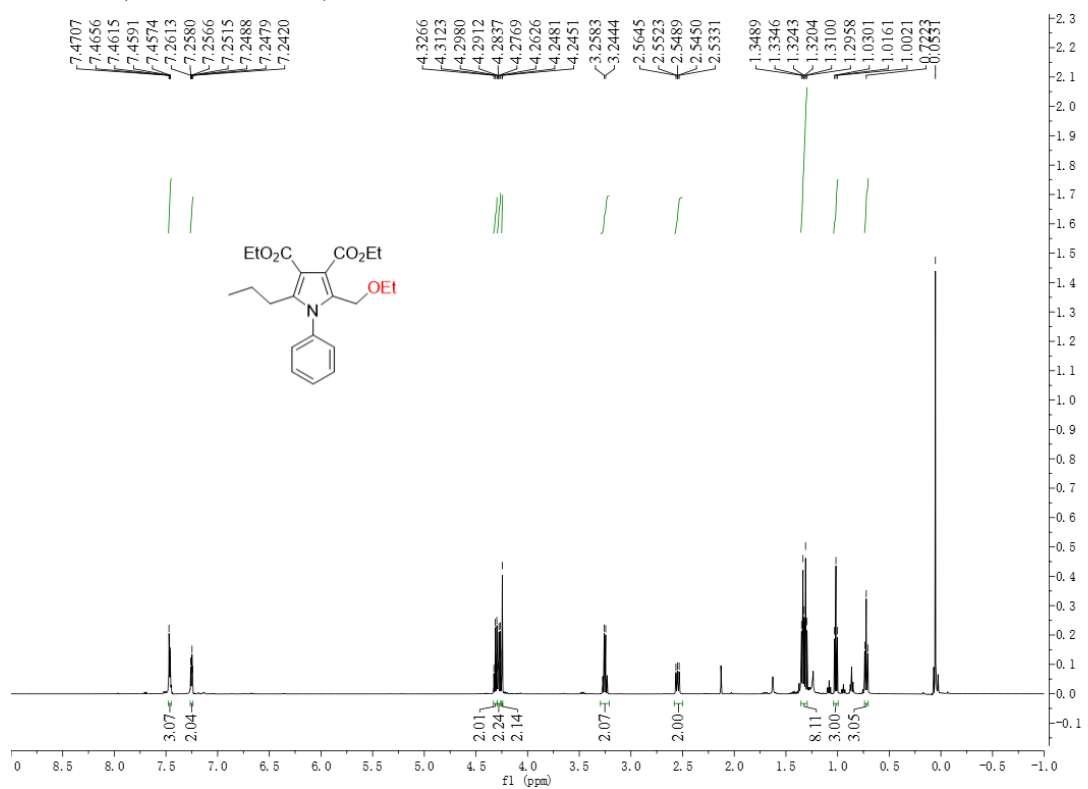

$^{13}\text{C}$  NMR (125 MHz,  $\text{CDCl}_3$ )

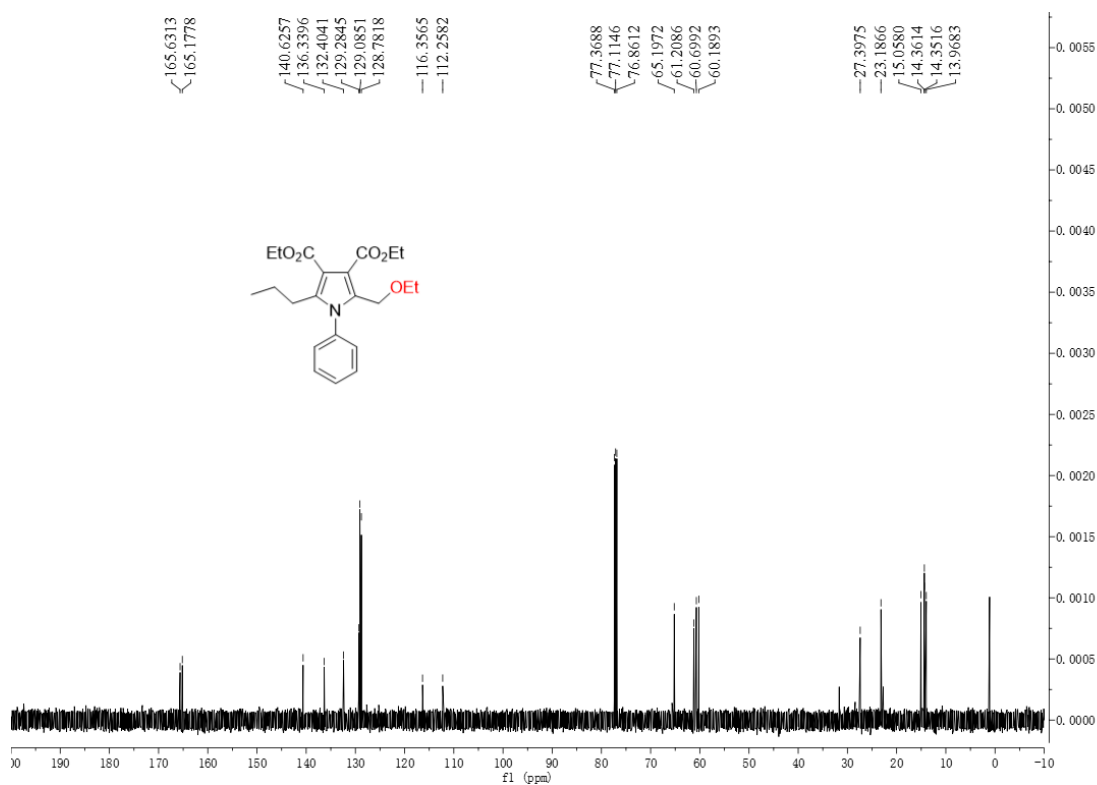

Diethyl 2-(methoxymethyl)-1,5-diphenyl-1H-pyrrole-3,4-dicarboxylate (5ab)

$^1\text{H}$  NMR (500 MHz,  $\text{CDCl}_3$ )

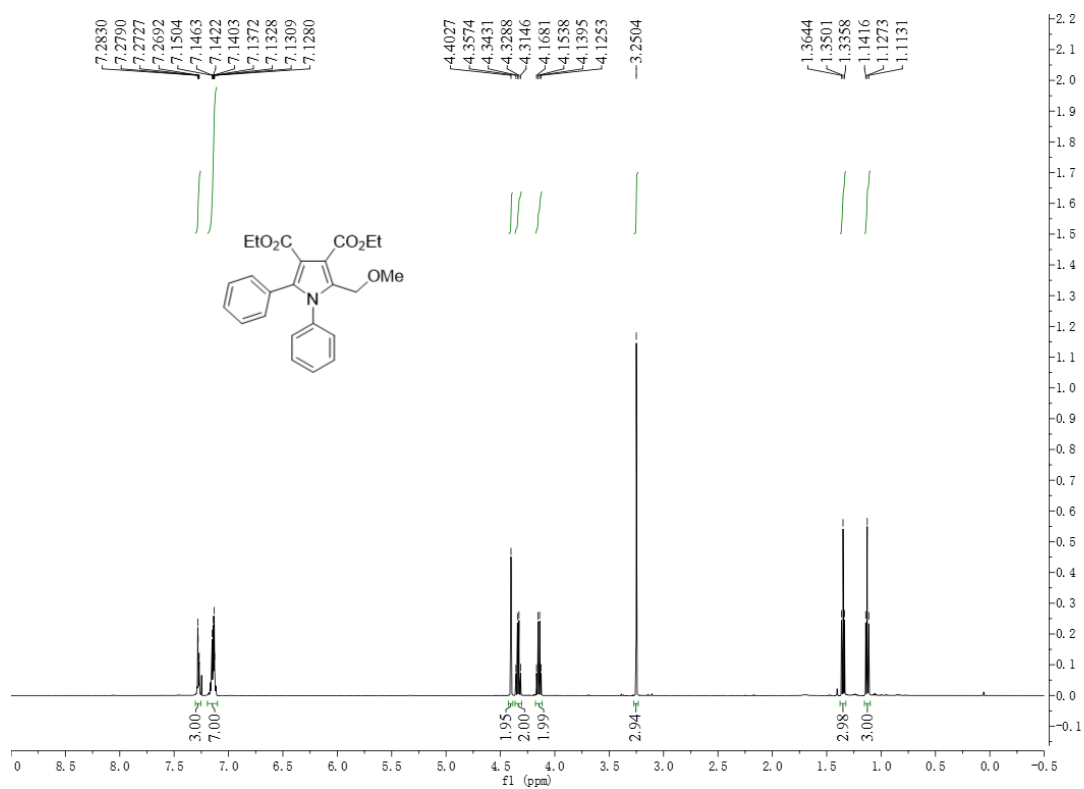

<sup>13</sup>C NMR (125 MHz, CDCl<sub>3</sub>)

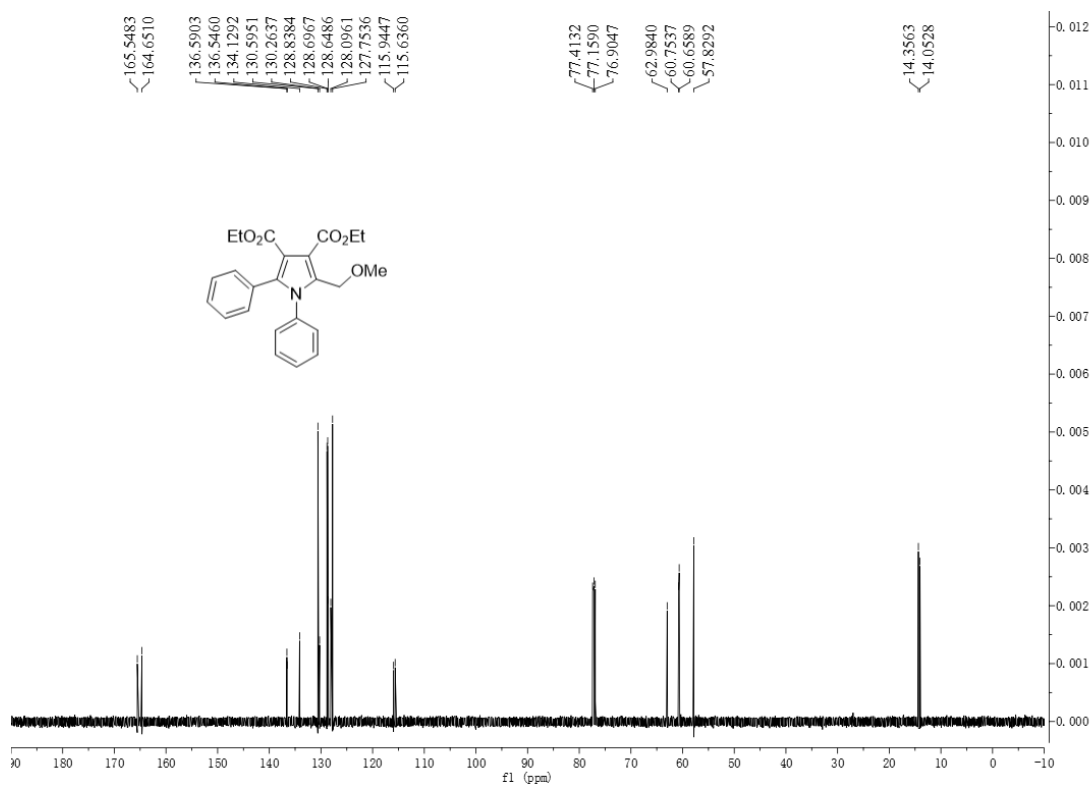

Diethyl 2-(butoxymethyl)-1,5-diphenyl-1H-pyrrole-3,4-dicarboxylate (5ac)

<sup>1</sup>H NMR (500 MHz, CDCl<sub>3</sub>)

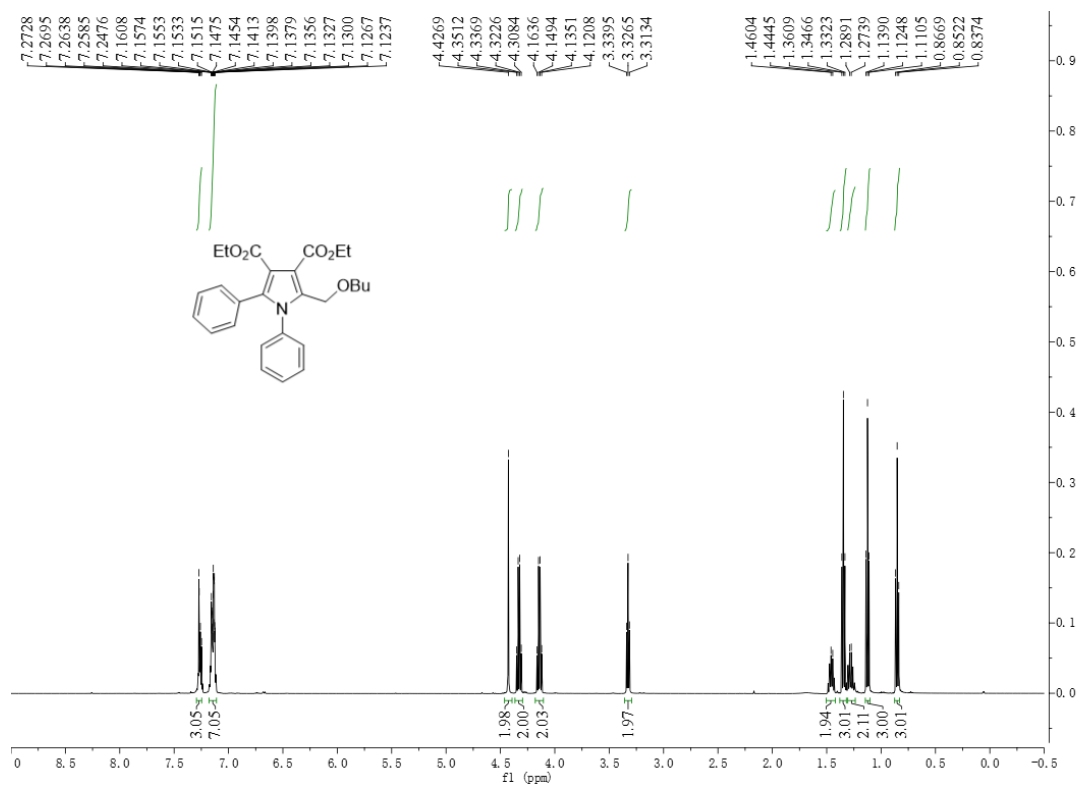

<sup>13</sup>C NMR (125 MHz, CDCl<sub>3</sub>)

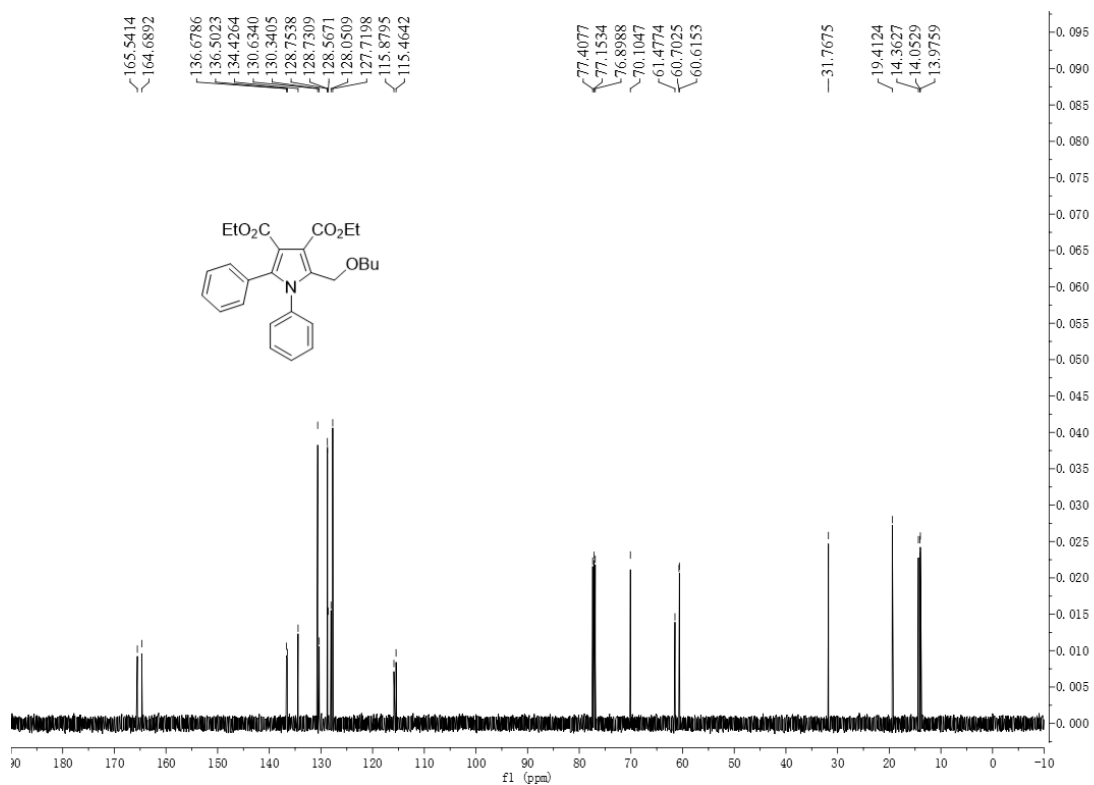

Diethyl 1,2-diphenyl-5-((phenylamino)methyl)-1H-pyrrole-3,4-dicarboxylate (6aa)

<sup>1</sup>H NMR (500 MHz, CDCl<sub>3</sub>)

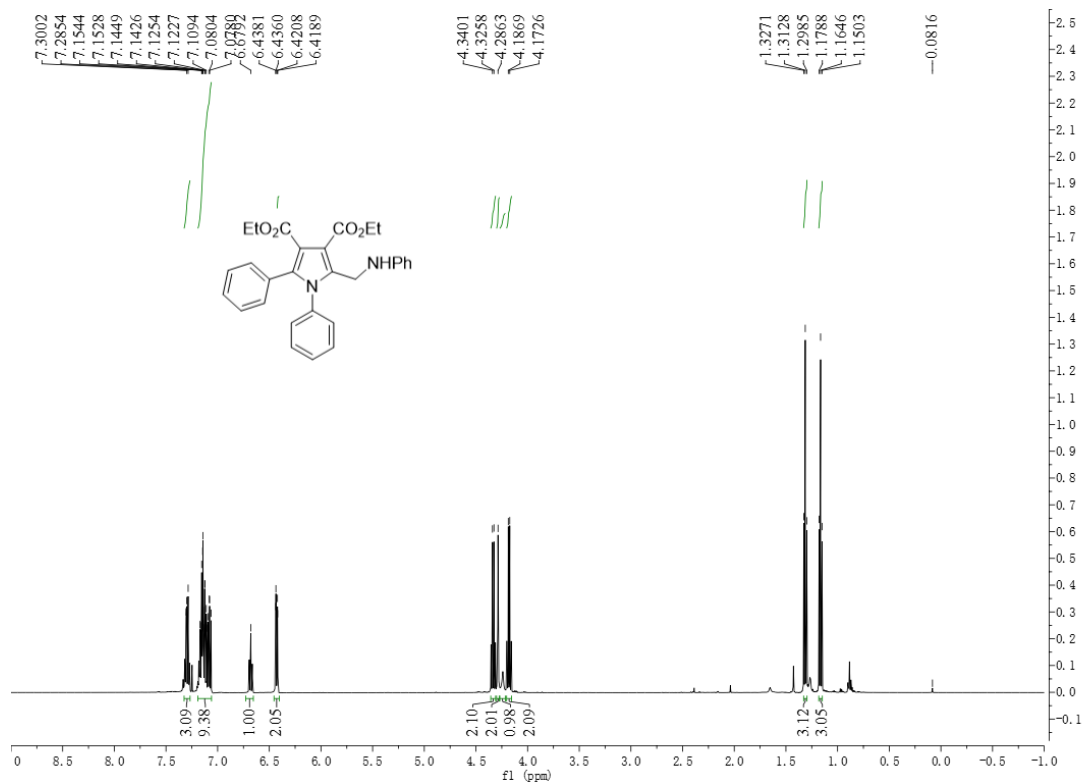

<sup>13</sup>C NMR (125 MHz, CDCl<sub>3</sub>)

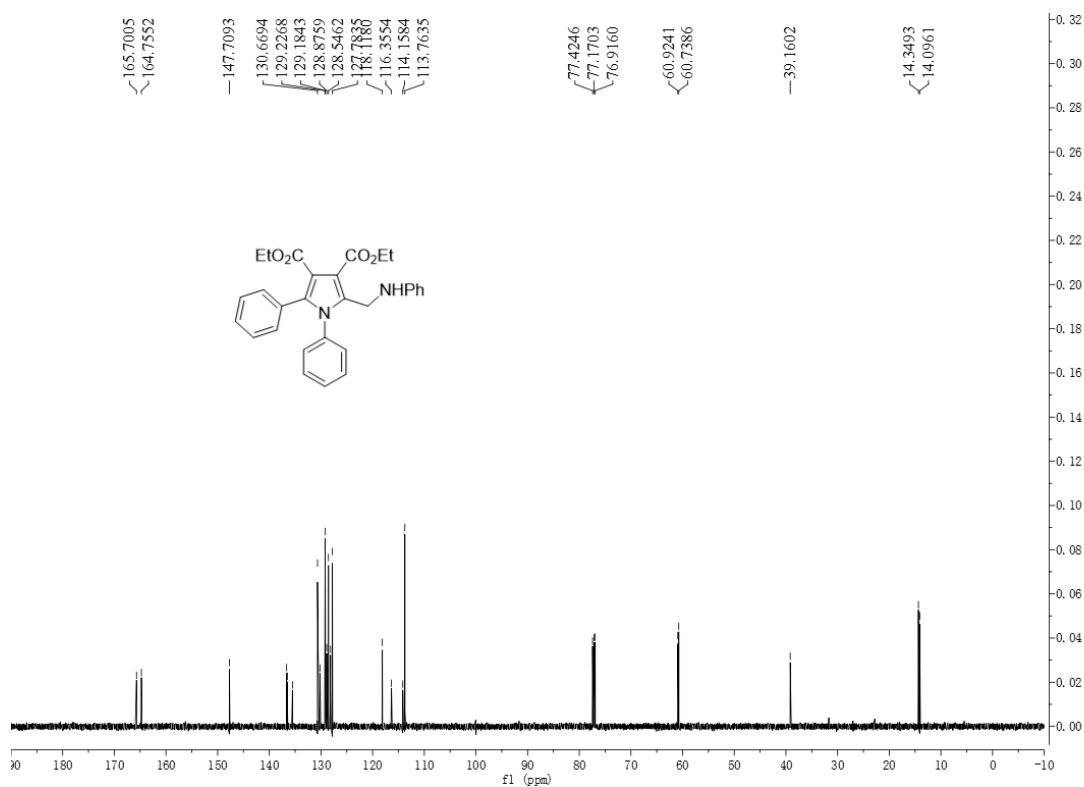

Ethyl 4-benzoyl-1,2-diphenyl-5-((phenylamino)methyl)-1H-pyrrole-3-carboxylate (6ab)

<sup>1</sup>H NMR (500 MHz, CDCl<sub>3</sub>)

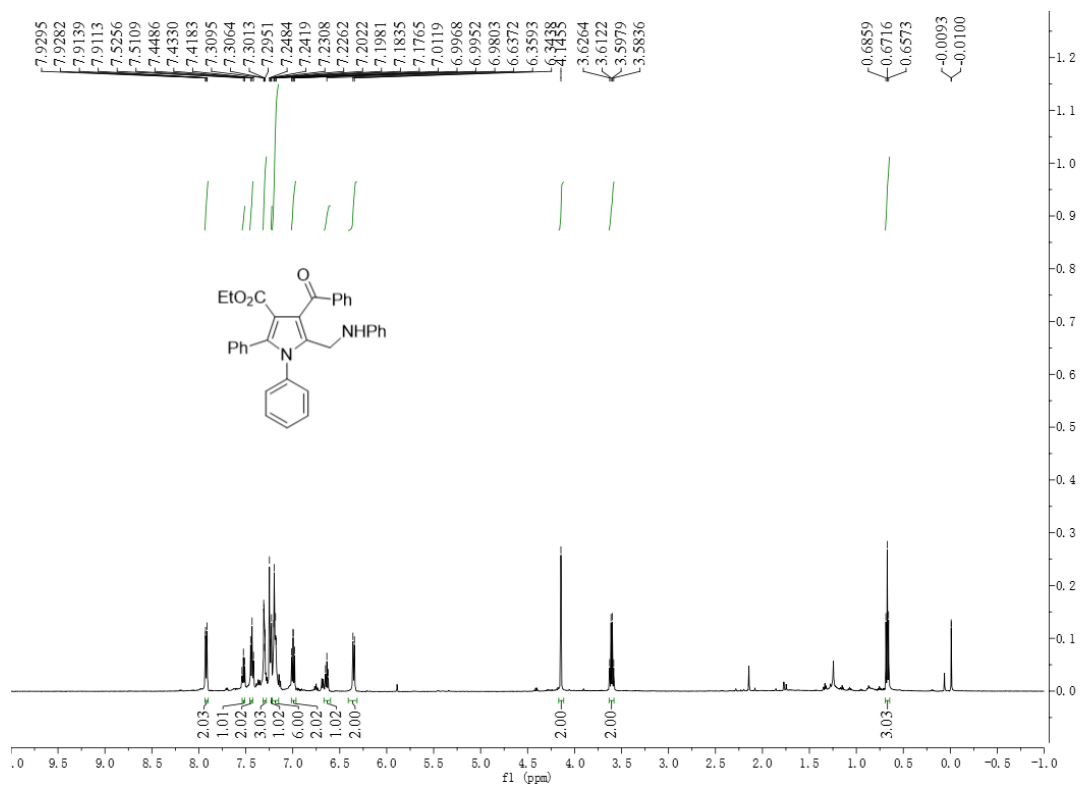



$^{13}\text{C}$  NMR (125 MHz,  $\text{CDCl}_3$ )

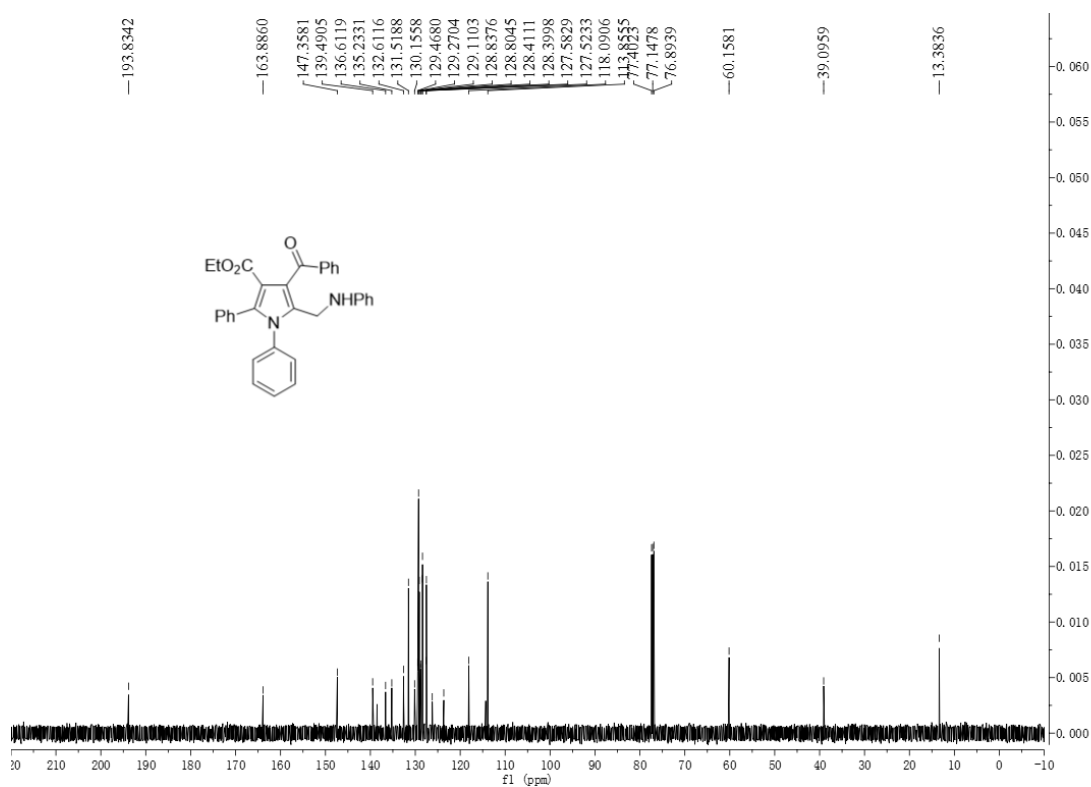

Diethyl 2-(azidomethyl)-1,5-diphenyl-1H-pyrrole-3,4-dicarboxylate (7aa)

$^1\text{H}$  NMR (500 MHz,  $\text{CDCl}_3$ )

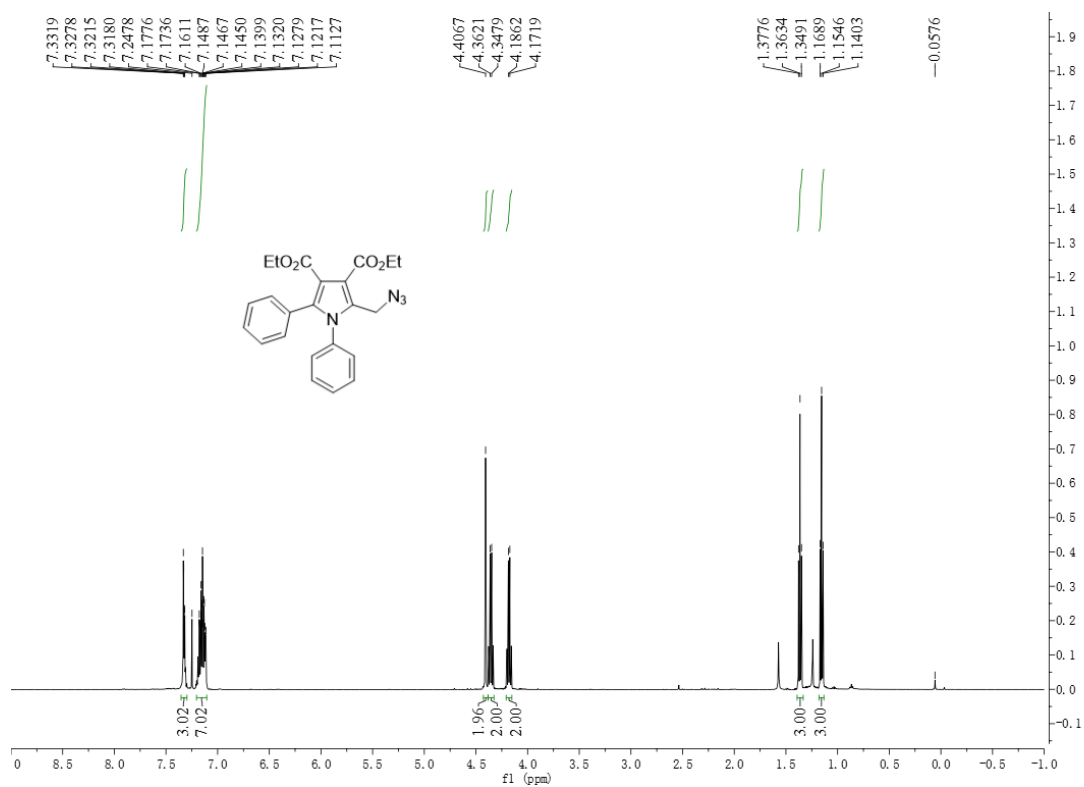

$^{13}\text{C}$  NMR (125 MHz,  $\text{CDCl}_3$ )

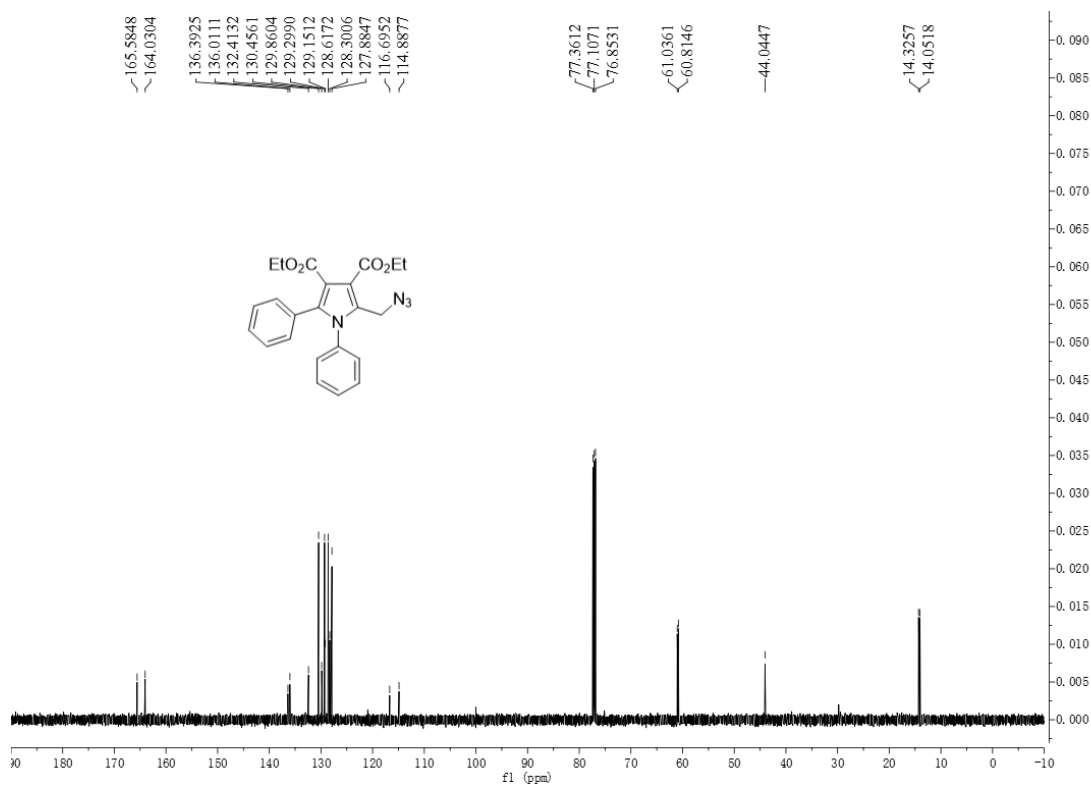

Diethyl 2-((1H-indol-3-yl)methyl)-1,5-diphenyl-1H-pyrrole-3,4-dicarboxylate (8aa)

$^1\text{H}$  NMR (500 MHz,  $\text{CDCl}_3$ )

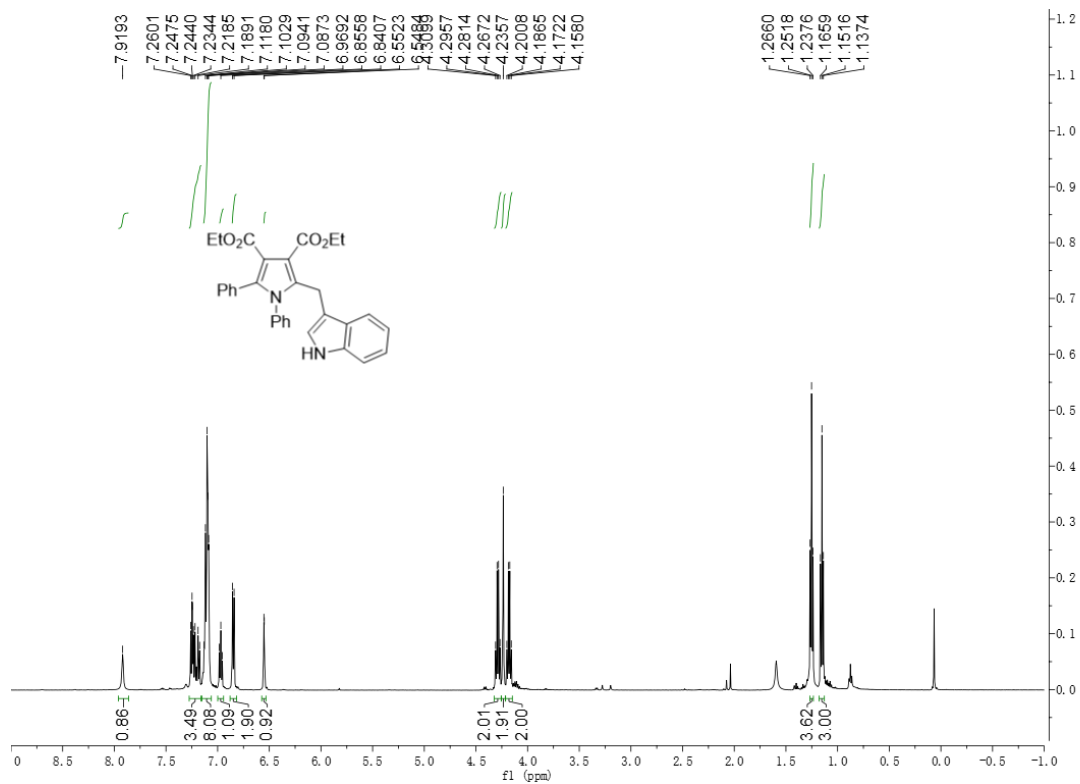

$^{13}\text{C}$  NMR (125 MHz,  $\text{CDCl}_3$ )

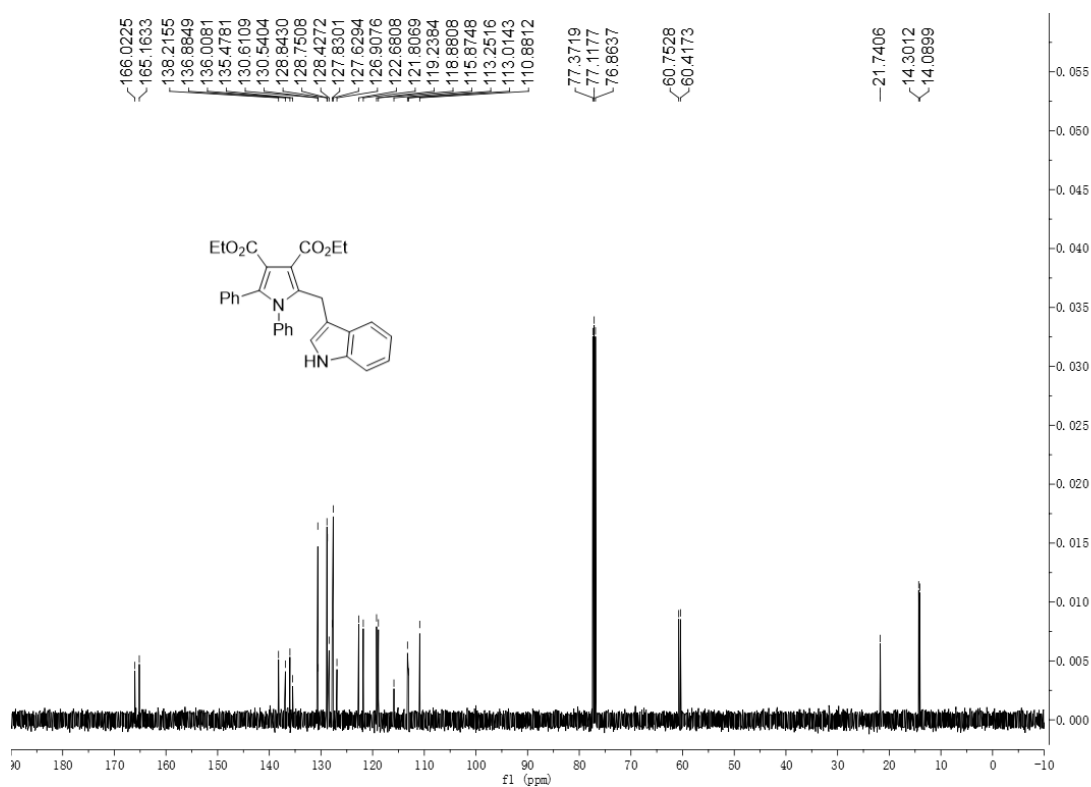

**Diethyl 2-((5-nitro-1H-indol-3-yl)methyl)-1,5-diphenyl-1H-pyrrole-3,4-dicarboxylate (8ab)**

$^1\text{H}$  NMR (500 MHz,  $\text{CDCl}_3$ )

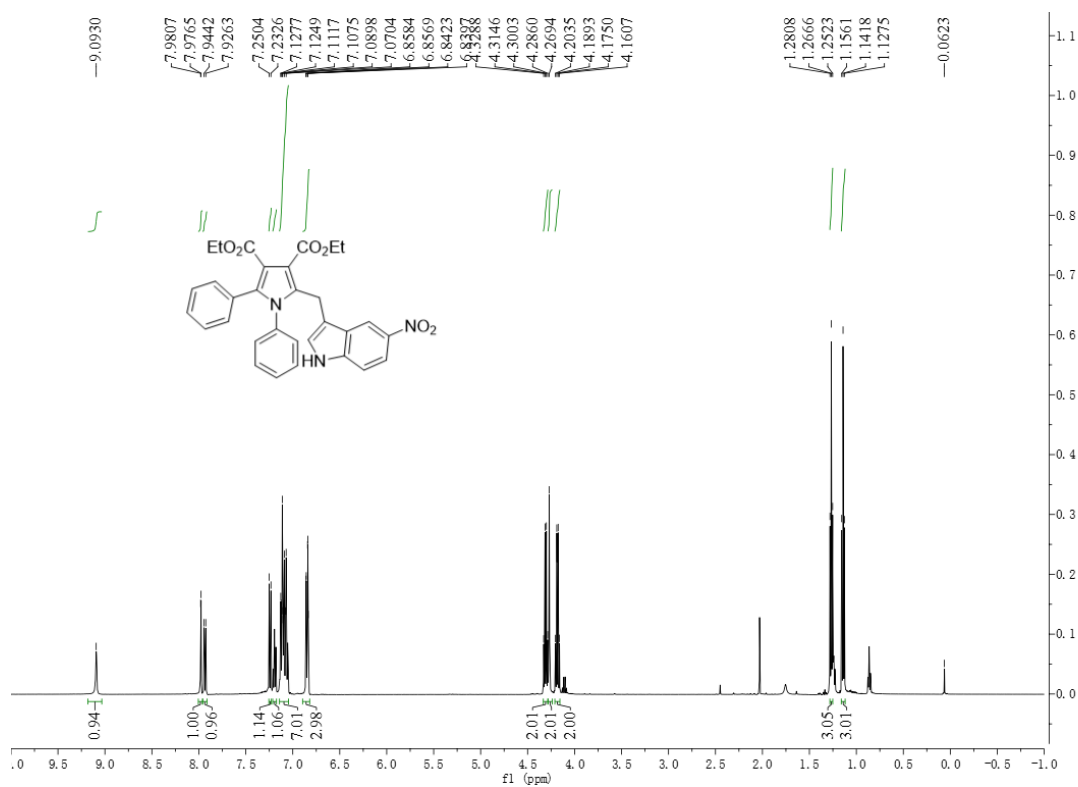

<sup>13</sup>C NMR (125 MHz, CDCl<sub>3</sub>)

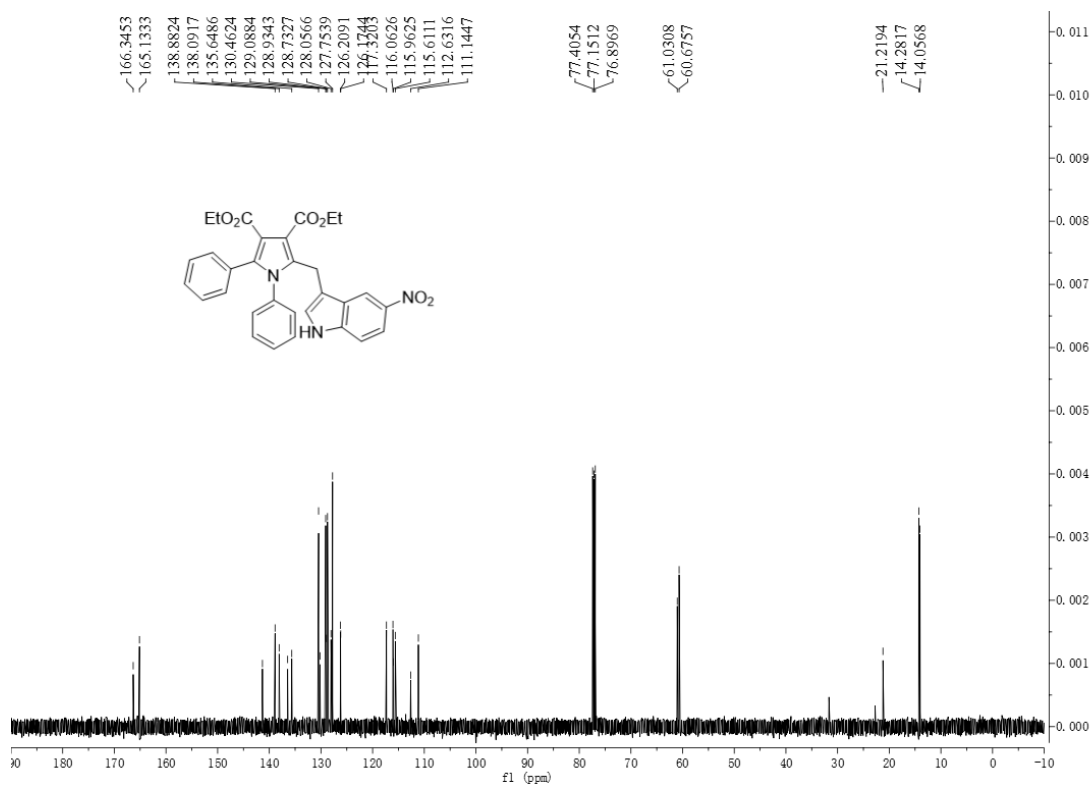

Diethyl 2-((5-methylfuran-2-yl)methyl)-1,5-diphenyl-1H-pyrrole-3,4-dicarboxylate (9aa)

<sup>1</sup>H NMR (500 MHz, CDCl<sub>3</sub>)

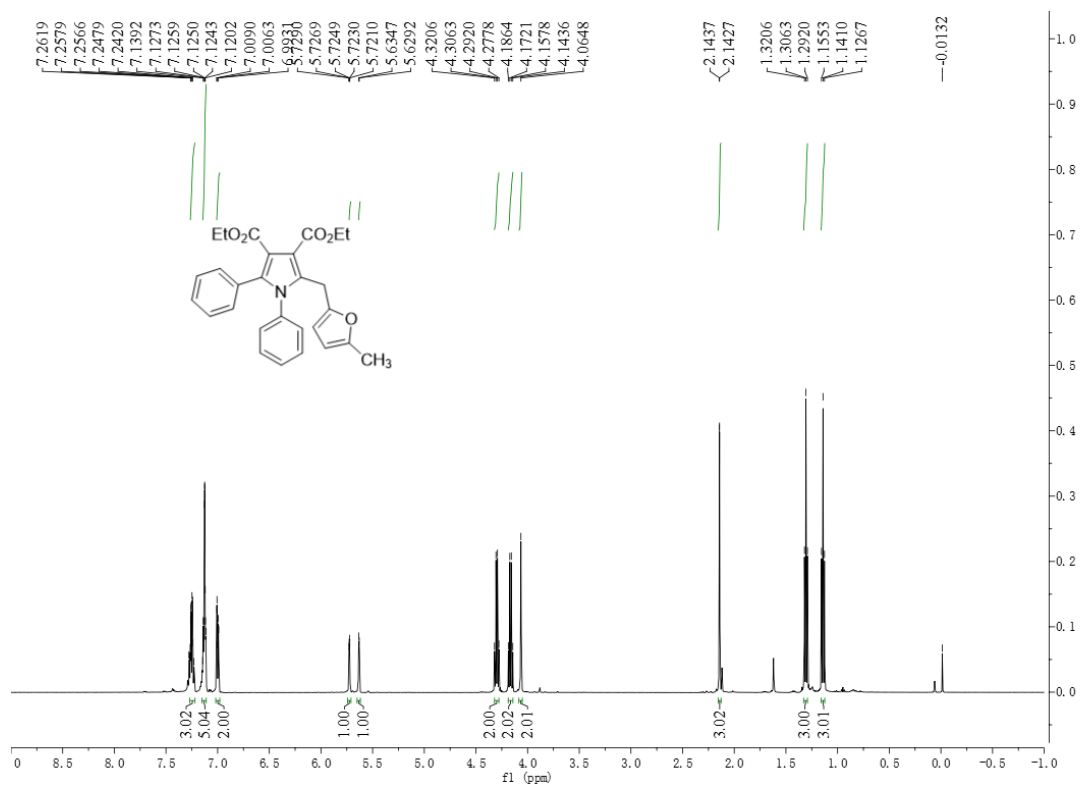

<sup>13</sup>C NMR (125 MHz, CDCl<sub>3</sub>)

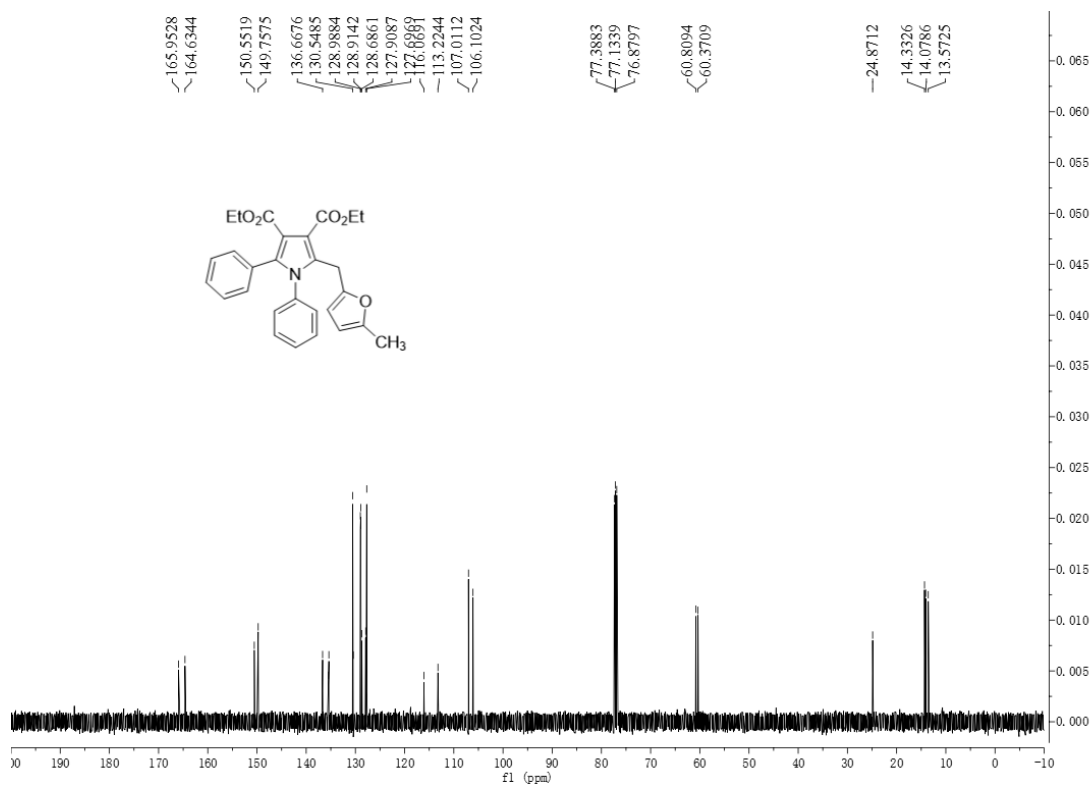

**Diethyl 1,2-diphenyl-5-(phenylsulfonamidomethyl)-1H-pyrrole-3,4-dicarboxylate (10aa)**

<sup>1</sup>H NMR (500 MHz, CDCl<sub>3</sub>)

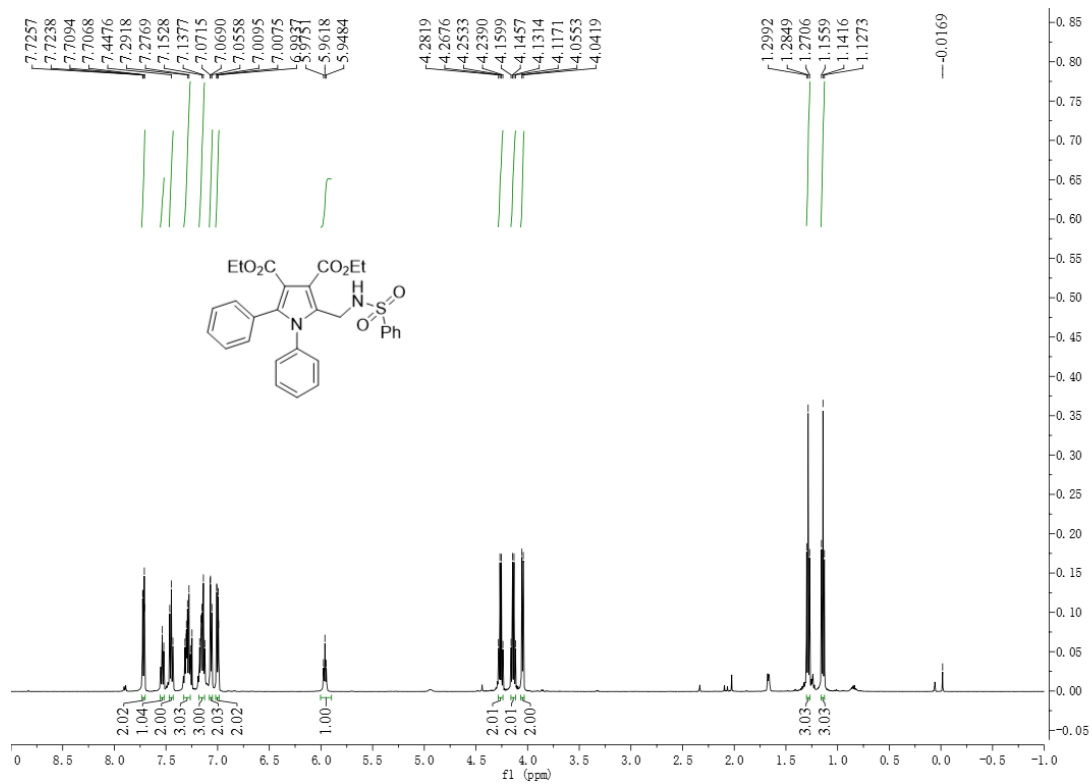

<sup>13</sup>C NMR (125 MHz, CDCl<sub>3</sub>)

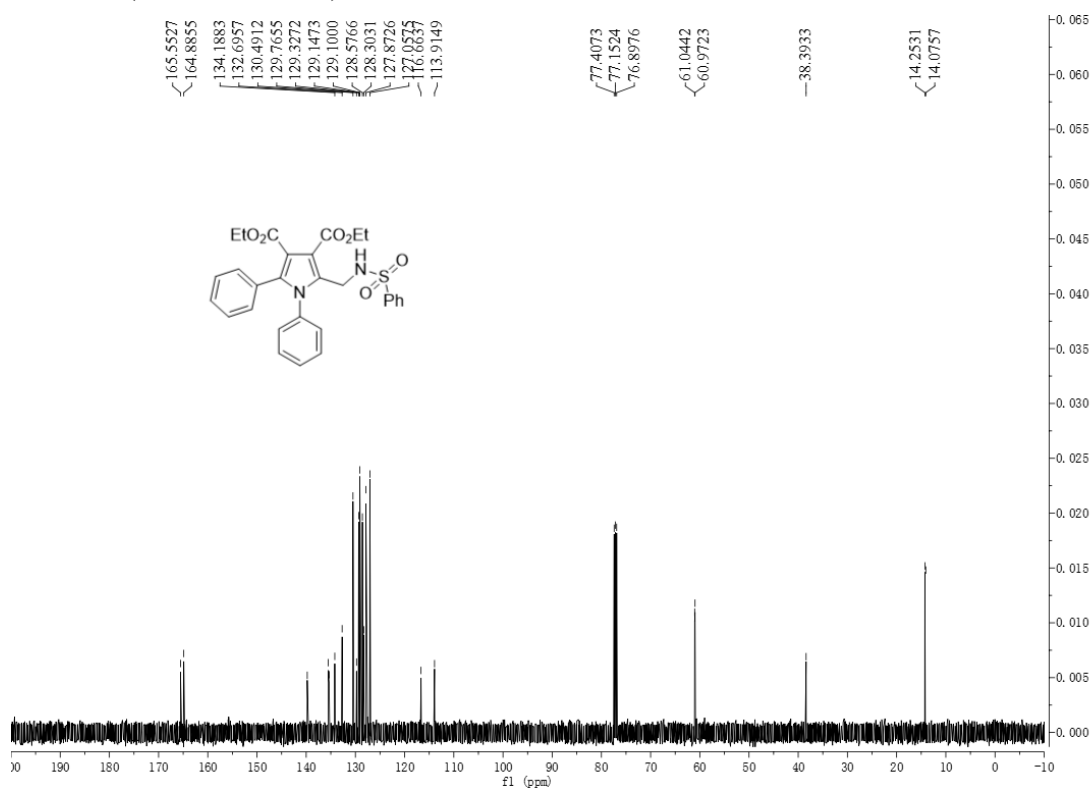

Diethyl 1,2-diphenyl-5-(2,4,6-trimethoxybenzyl)-1H-pyrrole-3,4-dicarboxylate (11aa)

<sup>1</sup>H NMR (500 MHz, CDCl<sub>3</sub>)

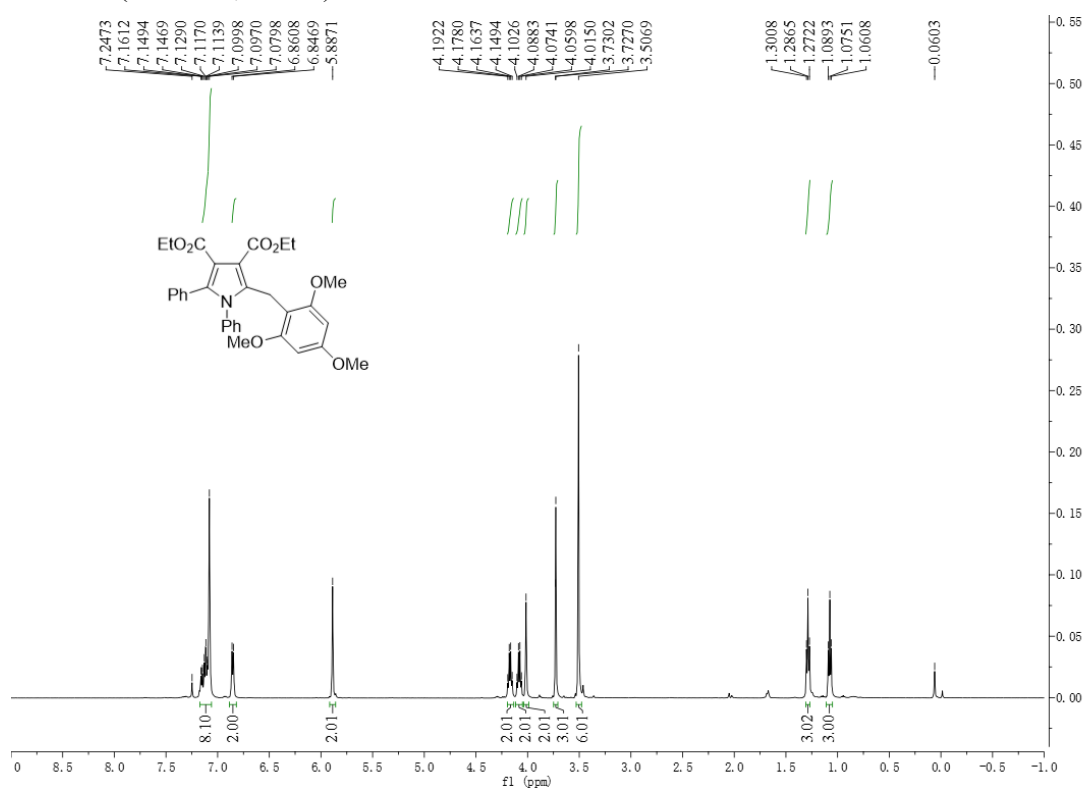

<sup>13</sup>C NMR (125 MHz, CDCl<sub>3</sub>)

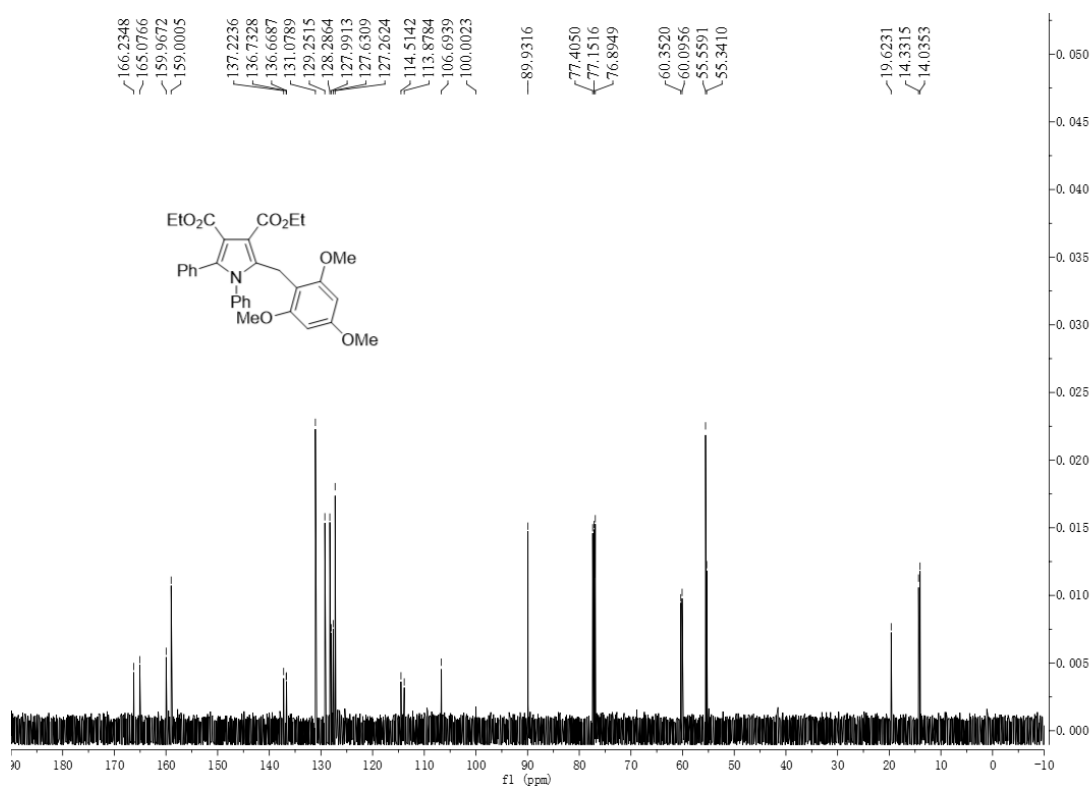

Diethyl 2-(4-(dimethylamino)benzyl)-1,5-diphenyl-1H-pyrrole-3,4-dicarboxylate (12aa)

<sup>1</sup>H NMR (500 MHz, CDCl<sub>3</sub>)

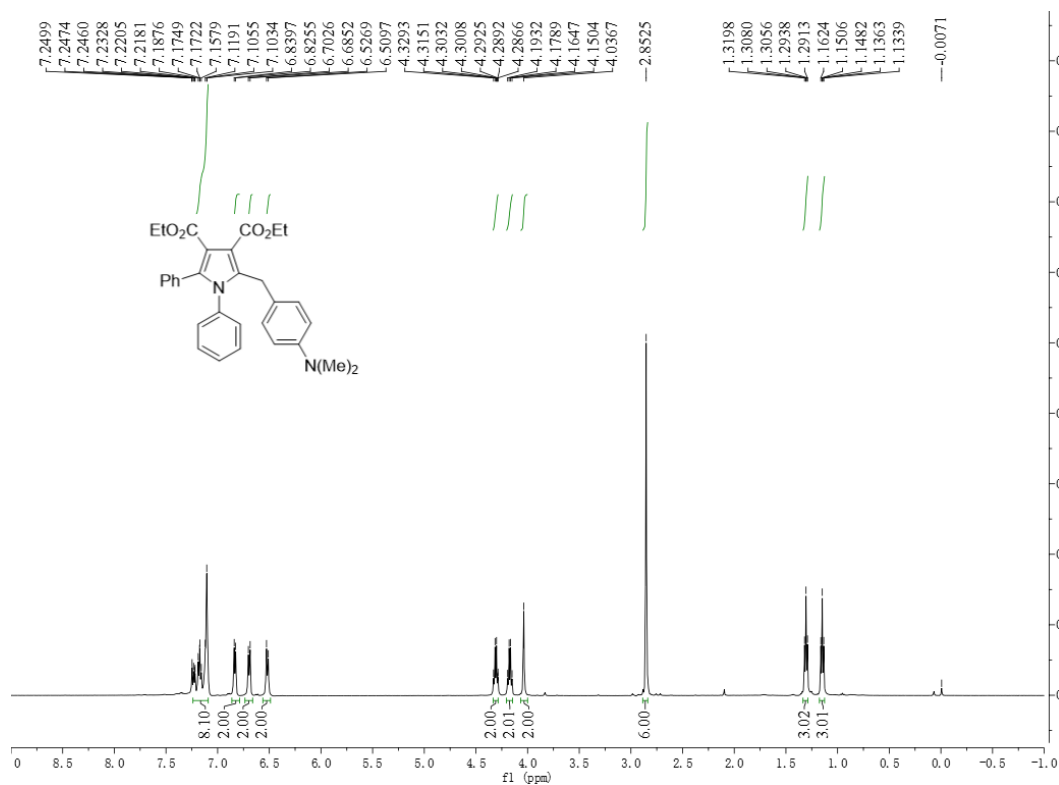

<sup>13</sup>C NMR (125 MHz, CDCl<sub>3</sub>)

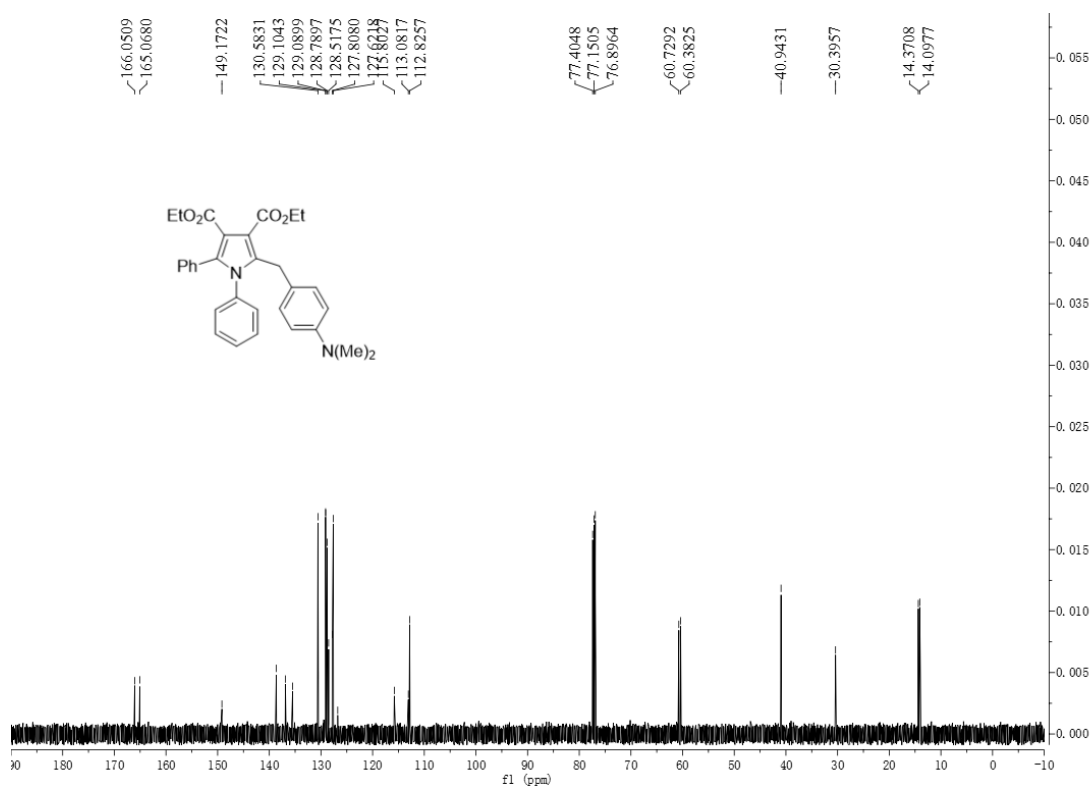

Diethyl 2-(2,5-dihydroxybenzyl)-1,5-diphenyl-1H-pyrrole-3,4-dicarboxylate (13aa)

<sup>1</sup>H NMR (500 MHz, CDCl<sub>3</sub>)

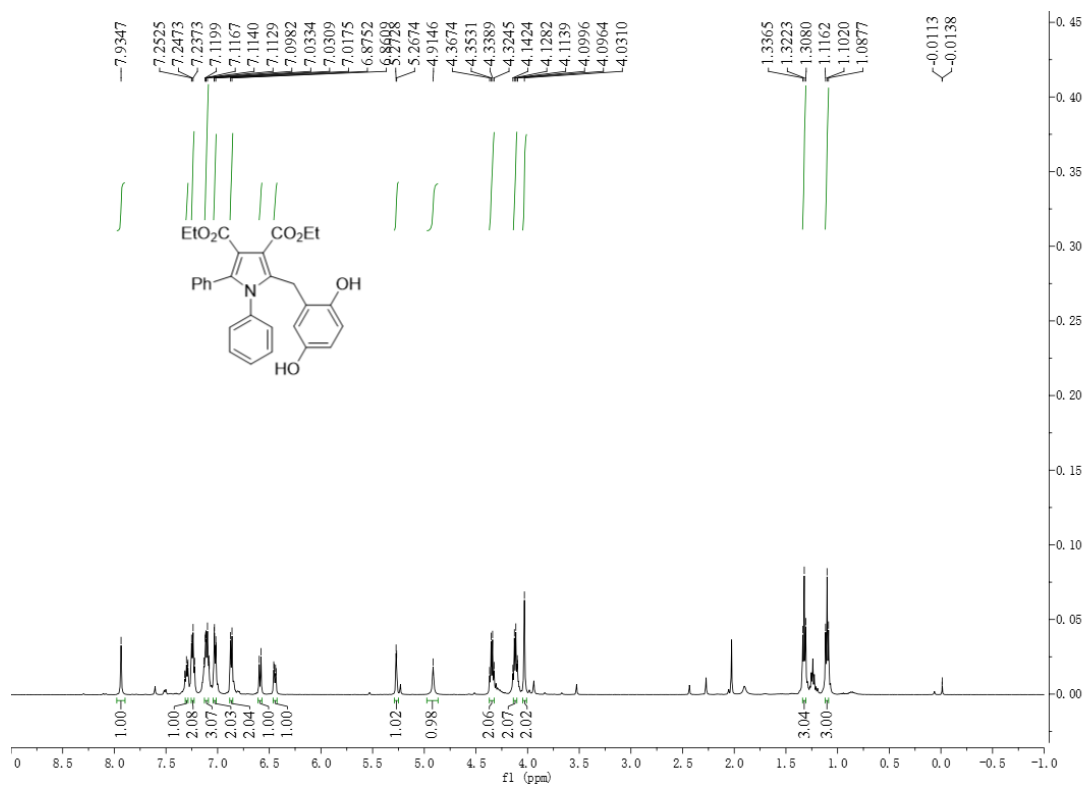



<sup>13</sup>C NMR (125 MHz, CDCl<sub>3</sub>)

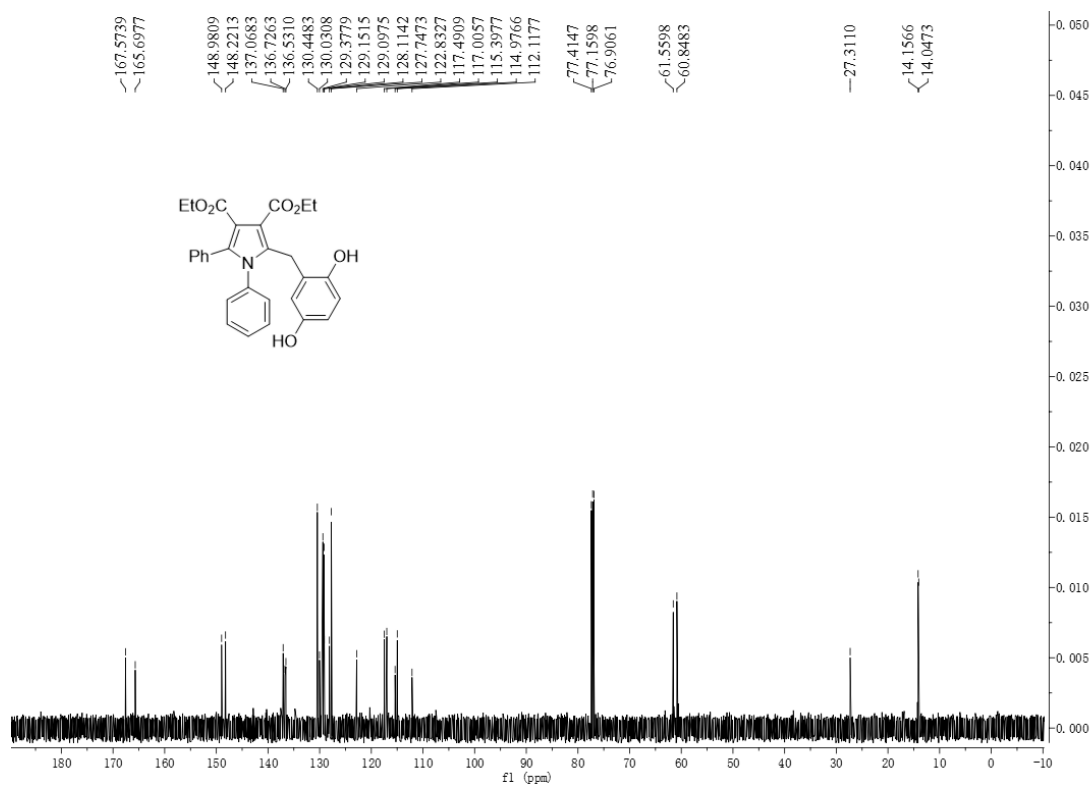

Diethyl 2-((butylthio)methyl)-1,5-diphenyl-1H-pyrrole-3,4-dicarboxylate (14aa)

<sup>1</sup>H NMR (500 MHz, CDCl<sub>3</sub>)

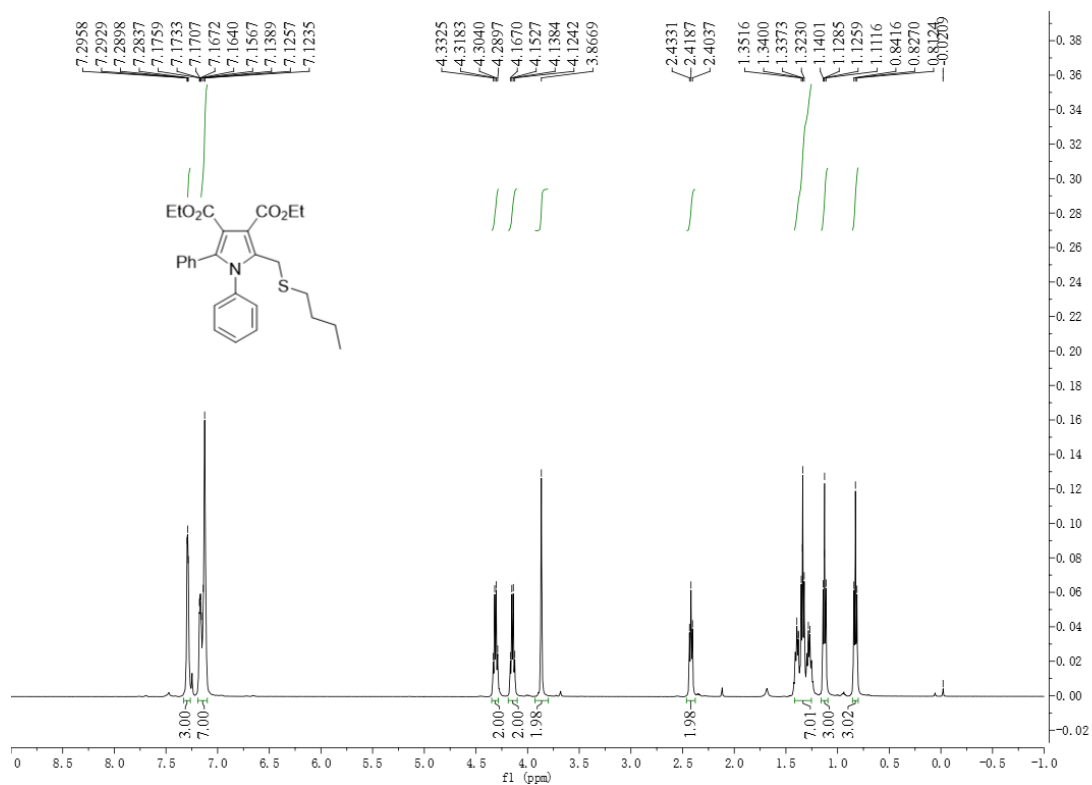

<sup>13</sup>C NMR (125 MHz, CDCl<sub>3</sub>)

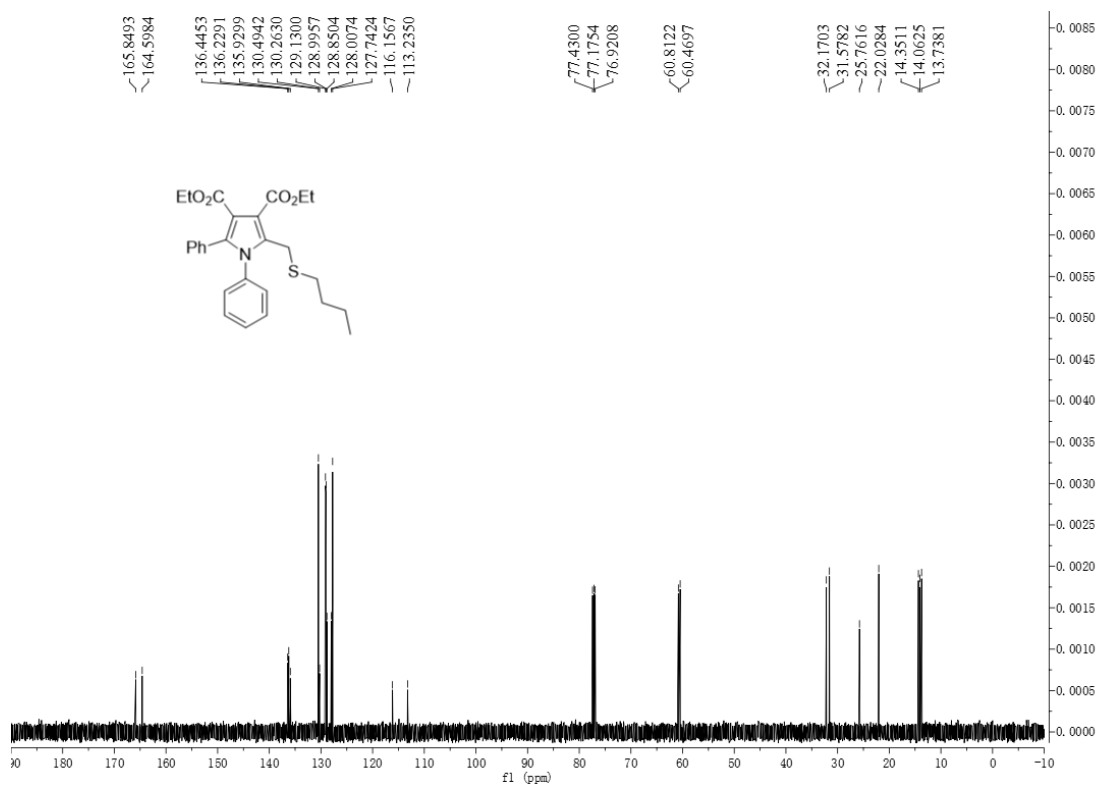

Diethyl 2-(2,4-dimethoxybenzyl)-1,5-diphenyl-1H-pyrrole-3,4-dicarboxylate (15aa)

<sup>1</sup>H NMR (500 MHz, CDCl<sub>3</sub>)

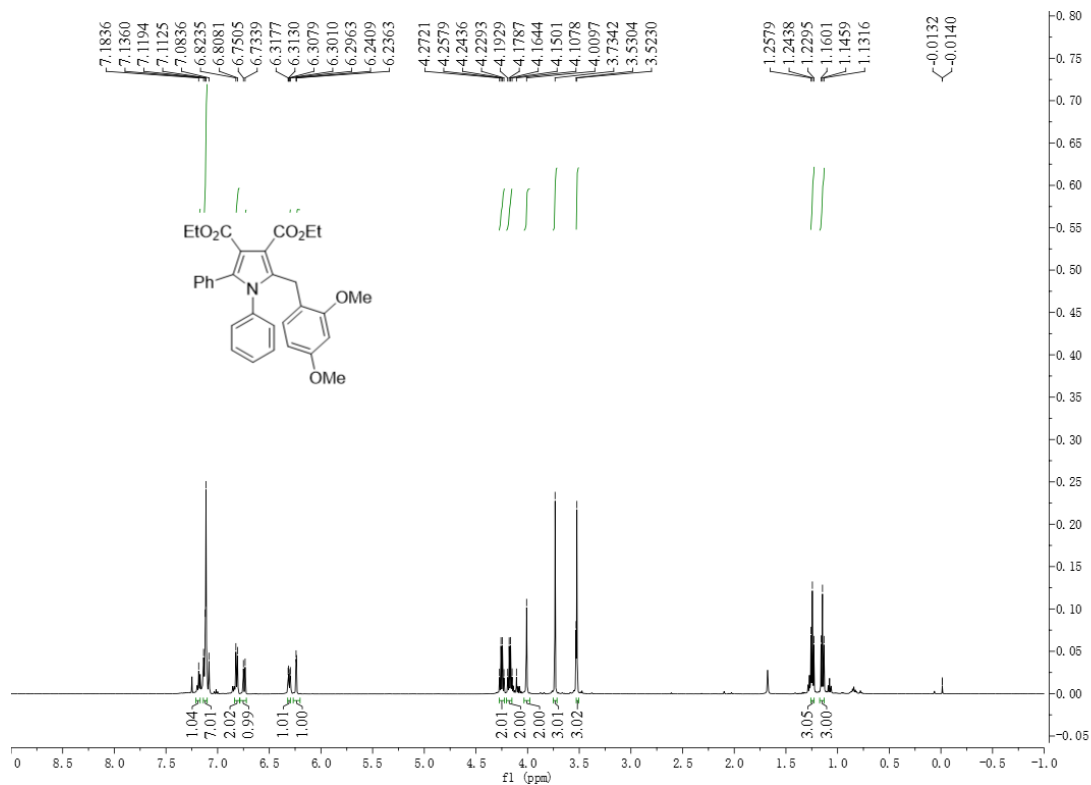

$^{13}\text{C}$  NMR (125 MHz,  $\text{CDCl}_3$ )

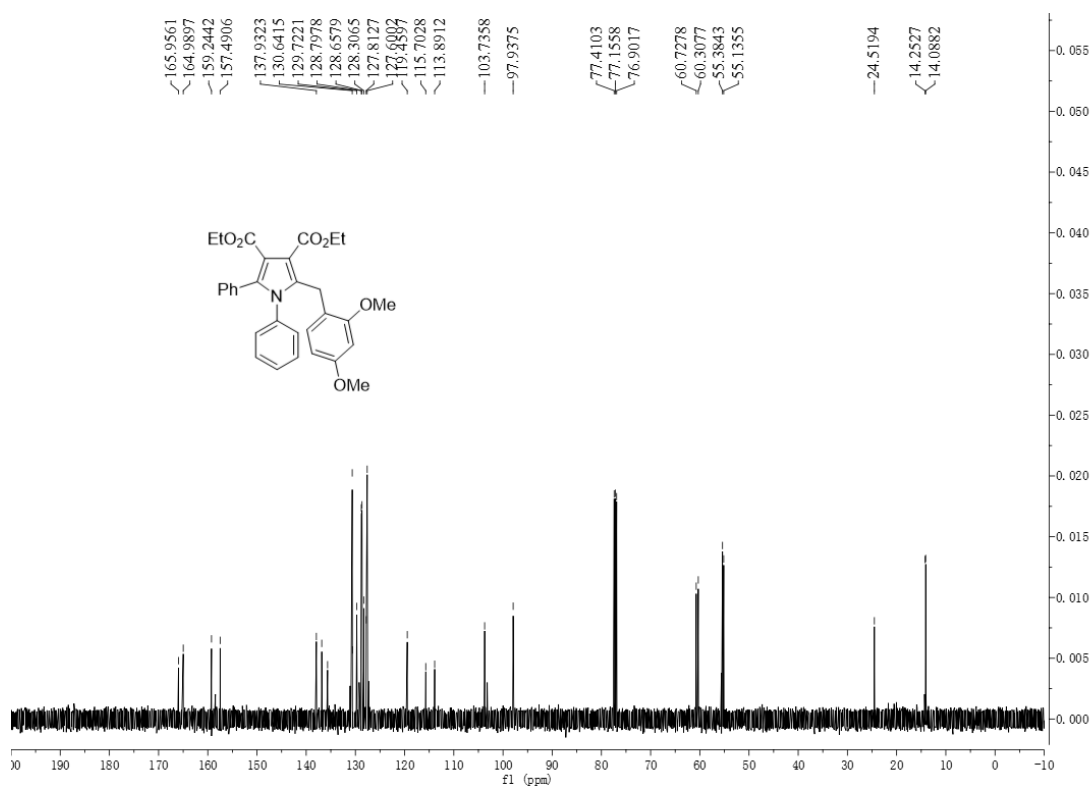

**Diethyl 2-((4-hydroxy-2-oxo-2H-chromen-3-yl)methyl)-1,5-diphenyl-1H-pyrrole-3,4-dicarboxylate (16aa)**

$^1\text{H}$  NMR (500 MHz,  $\text{CDCl}_3$ )

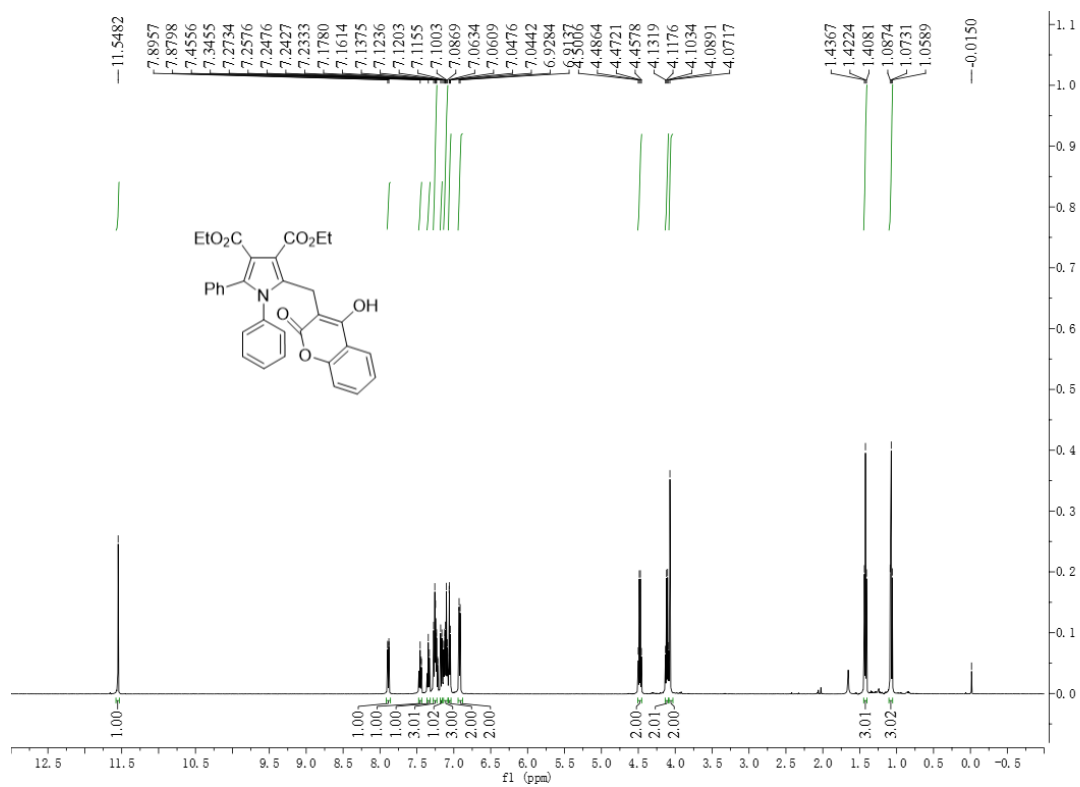

$^{13}\text{C}$  NMR (125 MHz,  $\text{CDCl}_3$ )

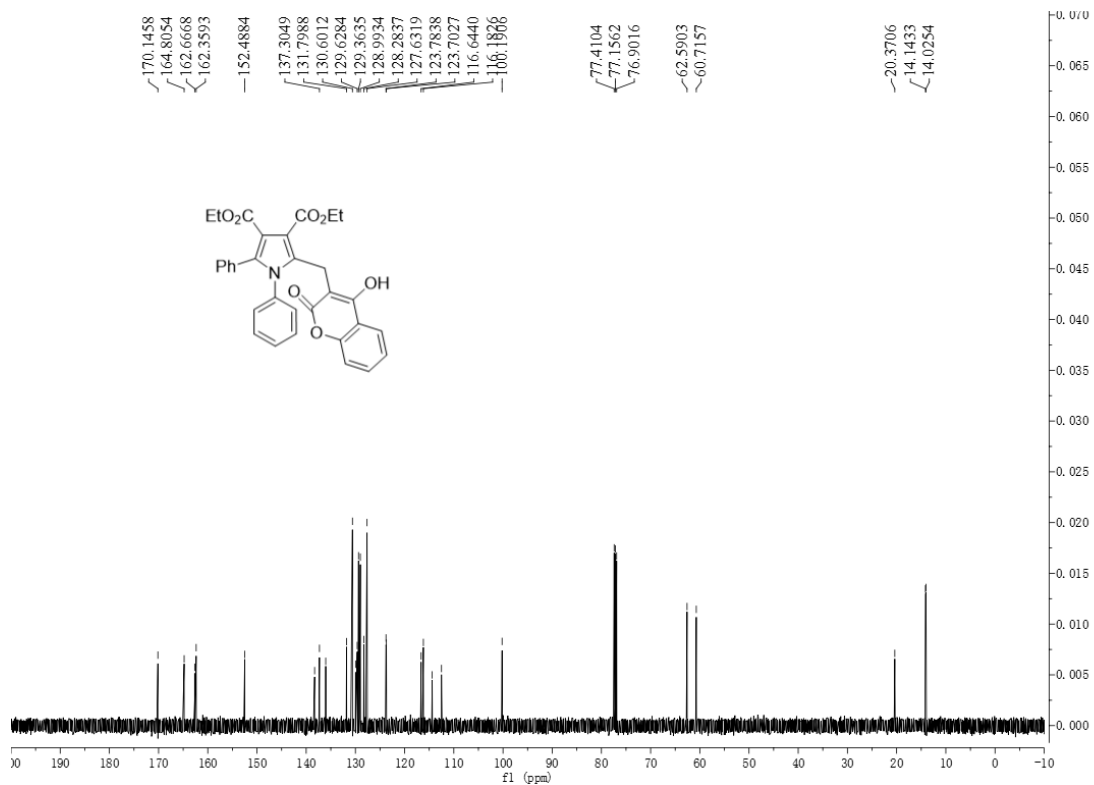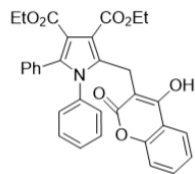

**3-Ethyl 4-((1*R*,2*S*,5*R*)-2-isopropyl-5-methylcyclohexyl) 5-(hydroxymethyl)-1,2-diphenyl-1*H*-pyrrole-3,4-dicarboxylate (17aa)**

$^1\text{H}$  NMR (500 MHz,  $\text{CDCl}_3$ )

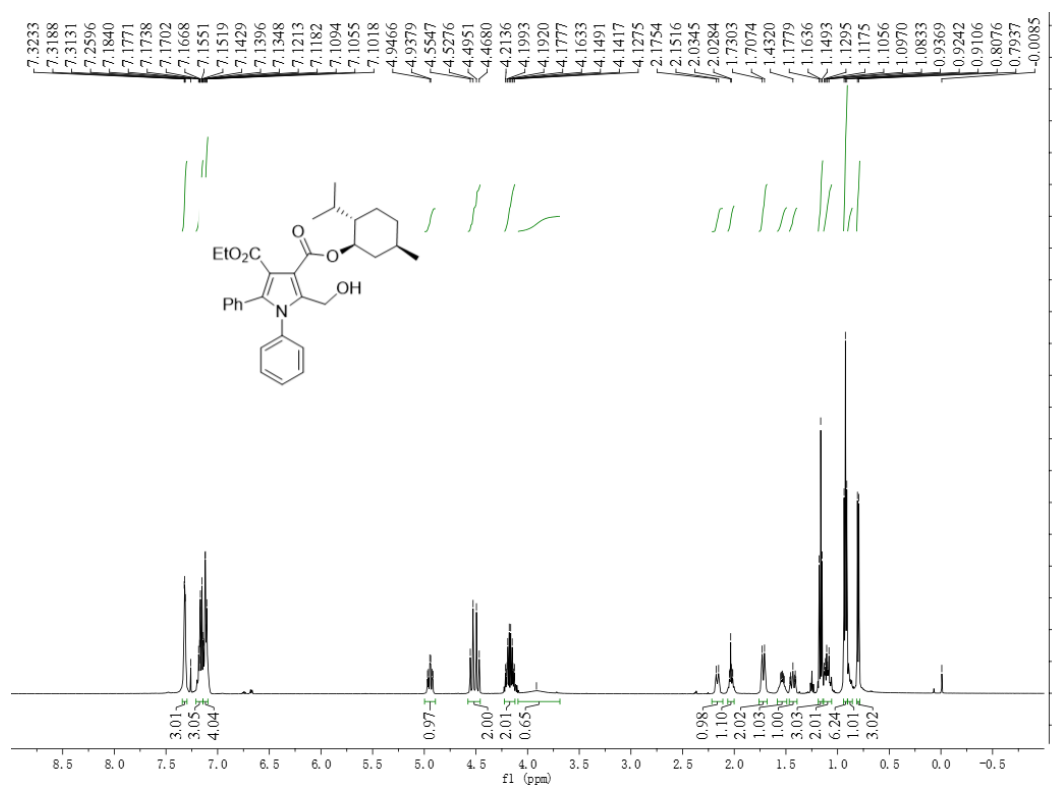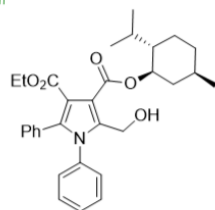

$^{13}\text{C}$  NMR (125 MHz,  $\text{CDCl}_3$ )

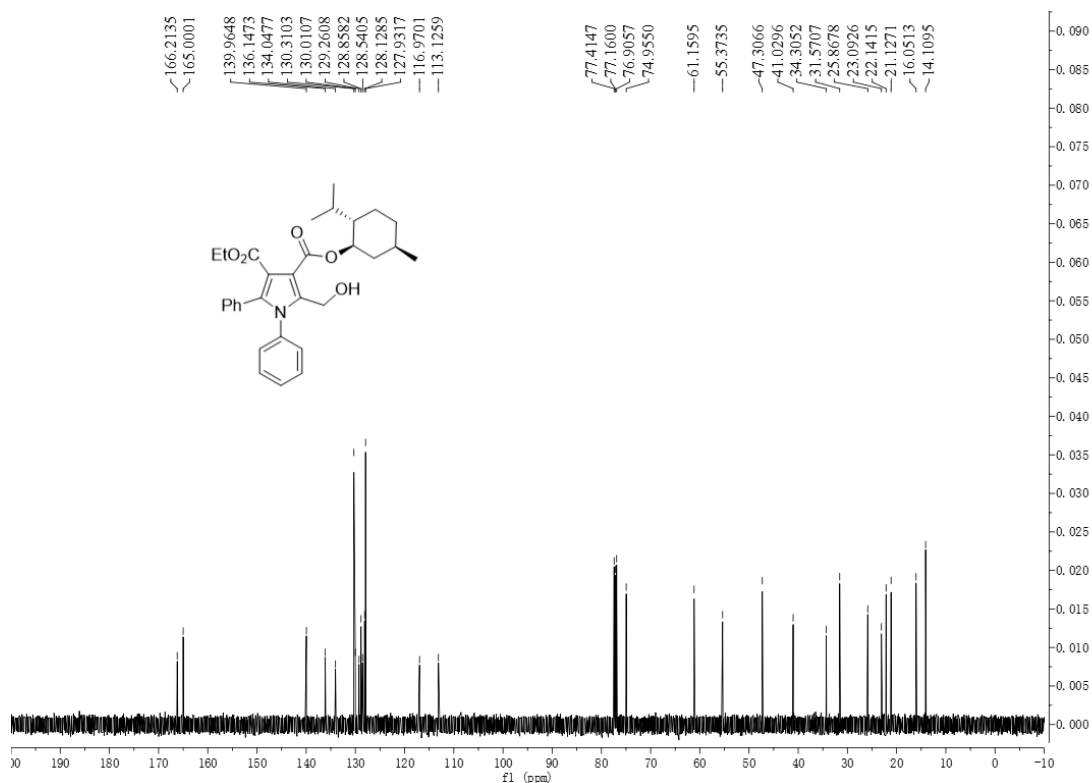

**3-((3*S*,5*S*,8*R*,9*S*,10*S*,13*R*,14*S*,17*R*)-10,13-Dimethyl-17-((*R*)-6-methylheptan-2-yl)hexadecahydro-1*H*-cyclopenta[*a*]phenanthren-3-yl) 4-ethyl 2-(hydroxymethyl)-1,5-diphenyl-1*H*-pyrrole-3,4-dicarboxylate (17ab)**

$^1\text{H}$  NMR (500 MHz,  $\text{CDCl}_3$ )

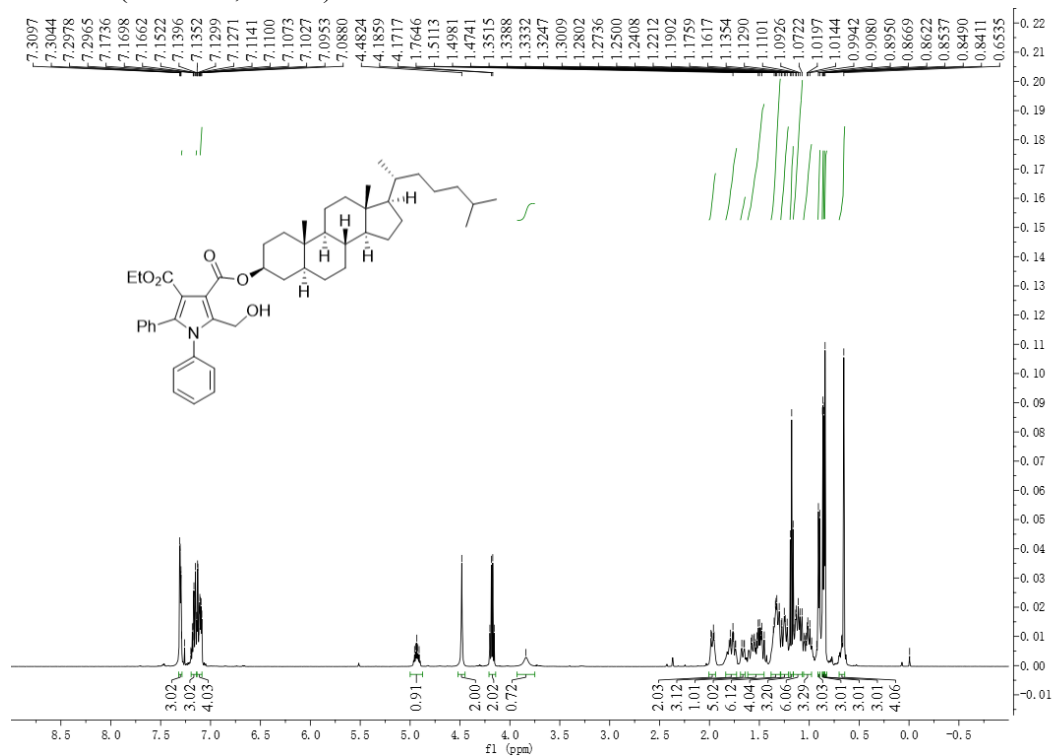

$^{13}\text{C}$  NMR (125 MHz,  $\text{CDCl}_3$ )

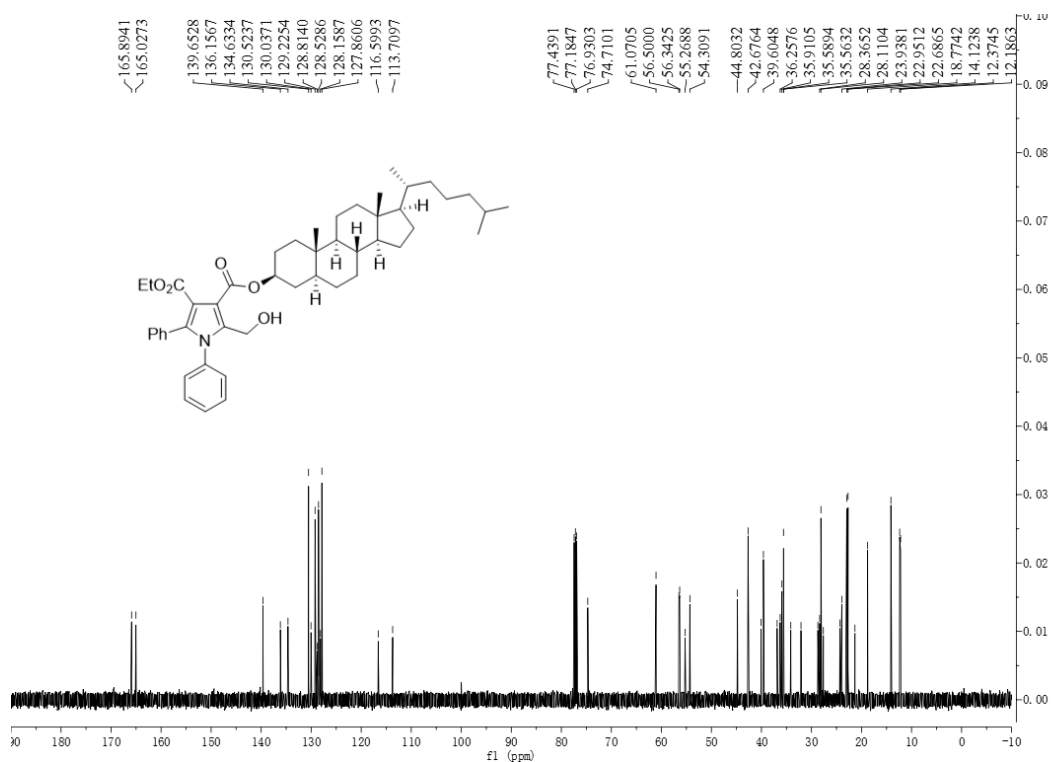

**3-Ethyl 4-((5*R*,5*aR*,8*aR*,9*R*)-8-oxo-9-(3,4,5-trimethoxyphenyl)-5,5*a*,6,8,8*a*,9-hexahydrofuro[3',4':6,7]naphtho[2,3-*d*][1,3]dioxol-5-yl) 5-(hydroxymethyl)-1,2-diphenyl-1*H*-pyrrole-3,4-dicarboxylate (17ac)**

$^1\text{H}$  NMR (500 MHz,  $\text{CDCl}_3$ )

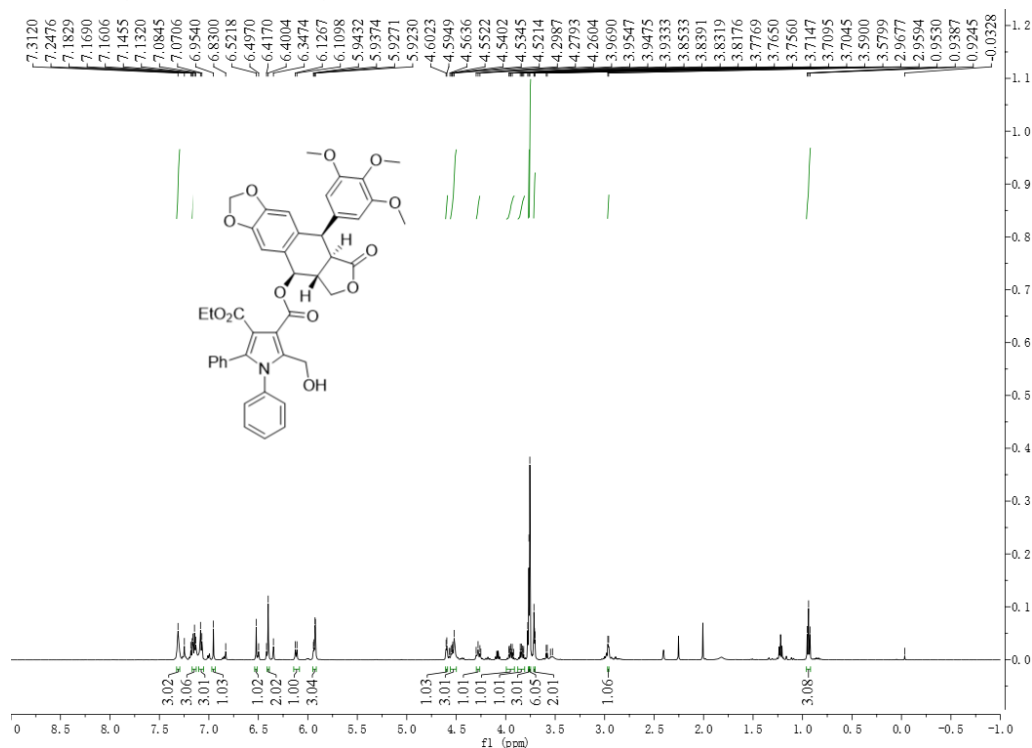

<sup>13</sup>C NMR (125 MHz, CDCl<sub>3</sub>)

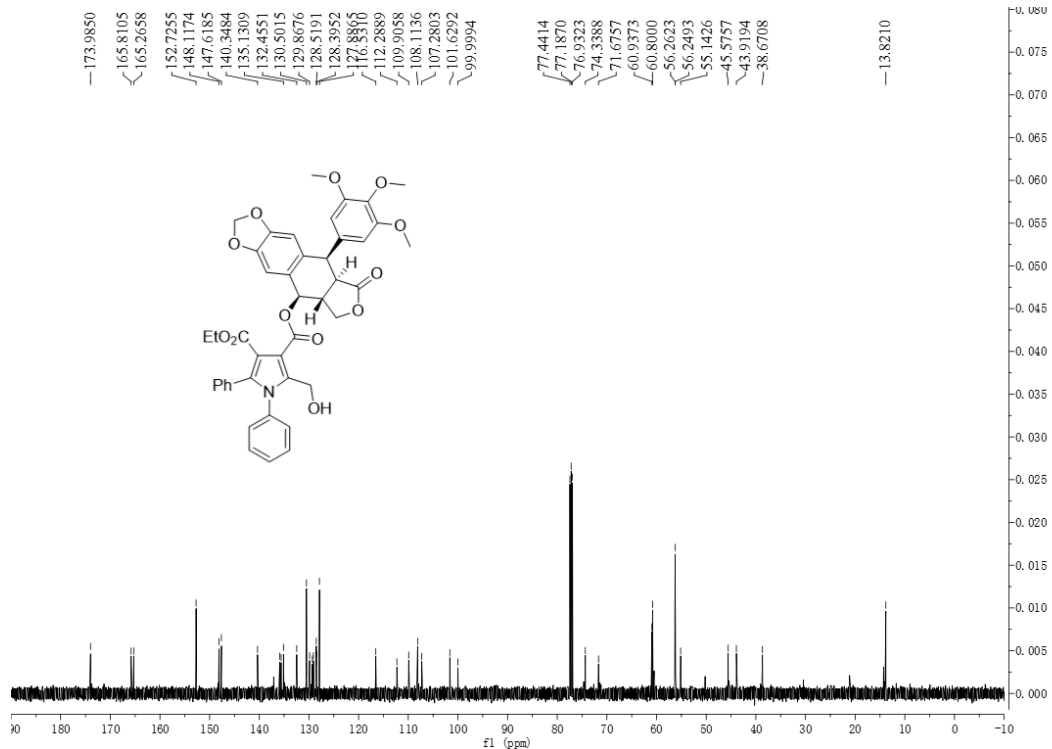

**3-Ethyl 4-((3R,4S,5R,6R)-3,4,5-tris(benzyloxy)-6-((benzyloxy)methyl)tetrahydro-2H-pyran-2-yl) 5-(hydroxymethyl)-1,2-diphenyl-1H-pyrrole-3,4-dicarboxylate (17ad)**

<sup>1</sup>H NMR (500 MHz, CDCl<sub>3</sub>)

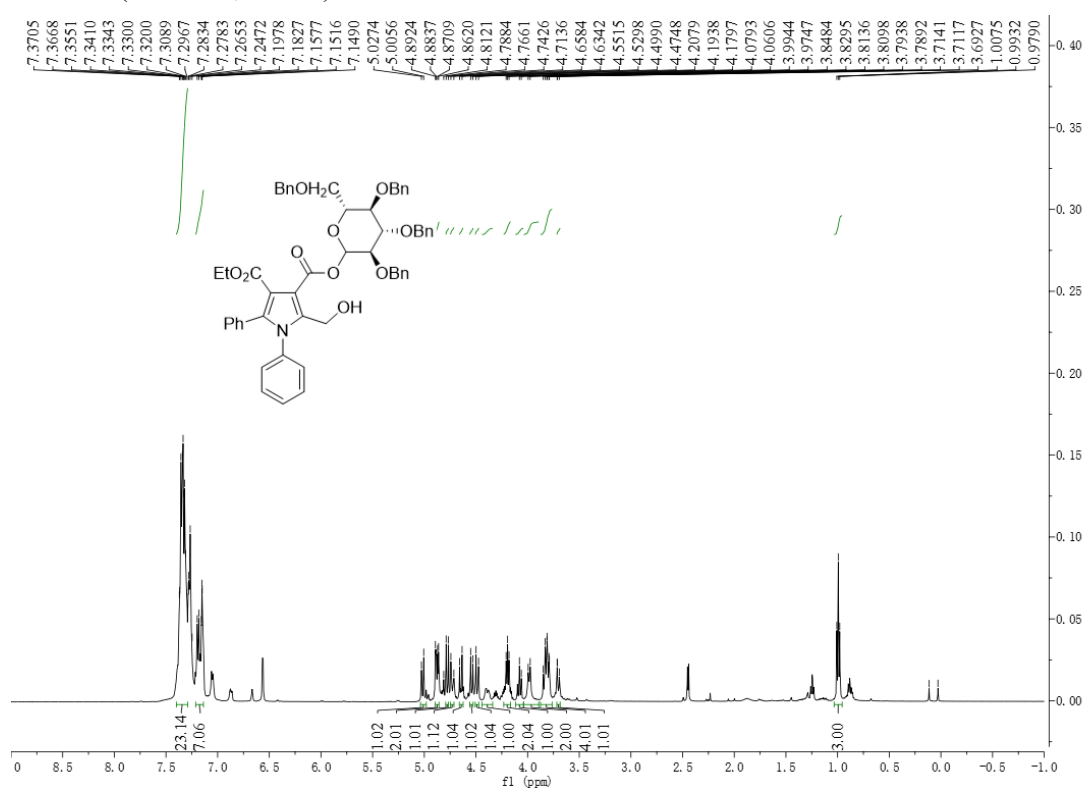

$^{13}\text{C}$  NMR (125 MHz,  $\text{CDCl}_3$ )

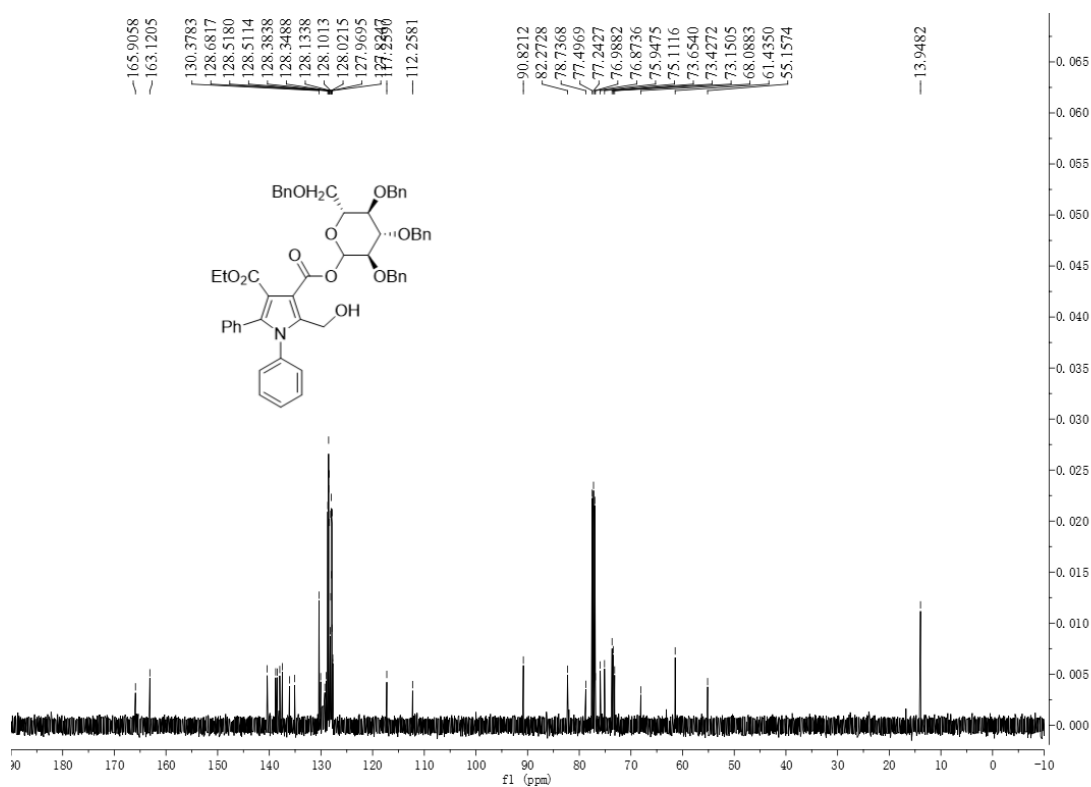

**3-Ethyl 4-(((2*S*,5*R*)-5-(5-methyl-2,4-dioxo-3,4-dihydropyrimidin-1(2*H*)-yl)-2,5-dihydrofuran-2-yl)methyl) 5-(hydroxymethyl)-1,2-diphenyl-1*H*-pyrrole-3,4-dicarboxylate (17ae)**

$^1\text{H}$  NMR (500 MHz,  $\text{CDCl}_3$ )

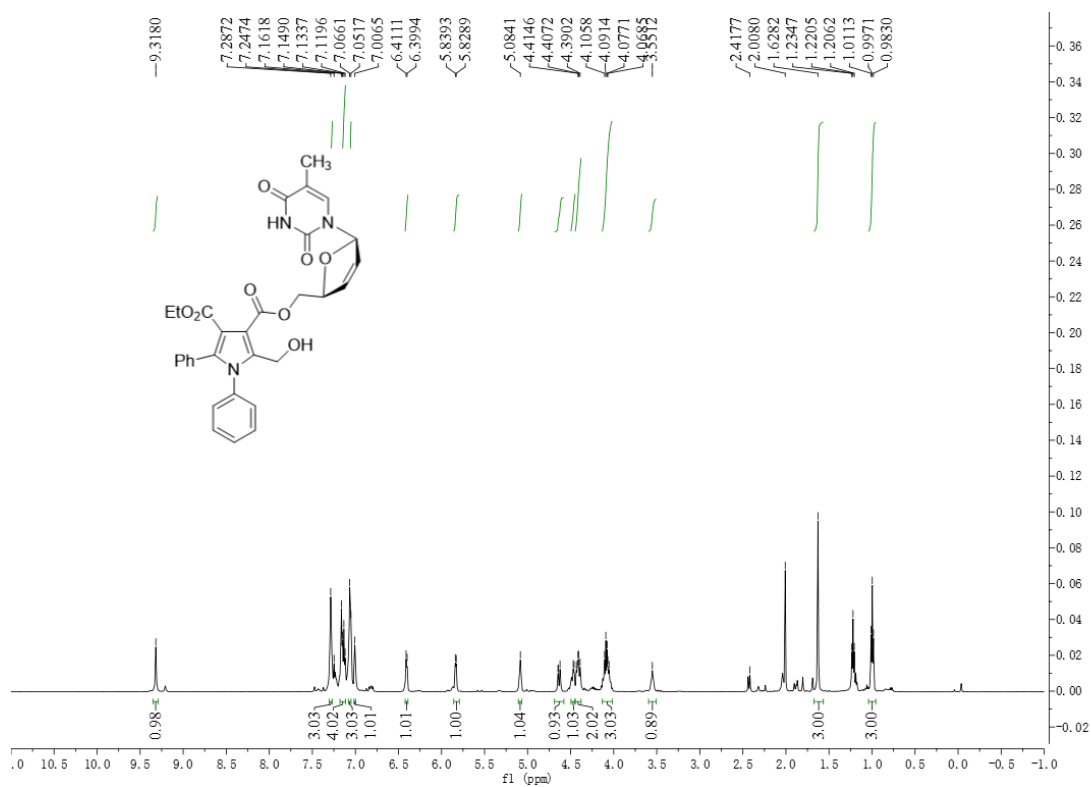



$^{13}\text{C}$  NMR (125 MHz,  $\text{CDCl}_3$ )

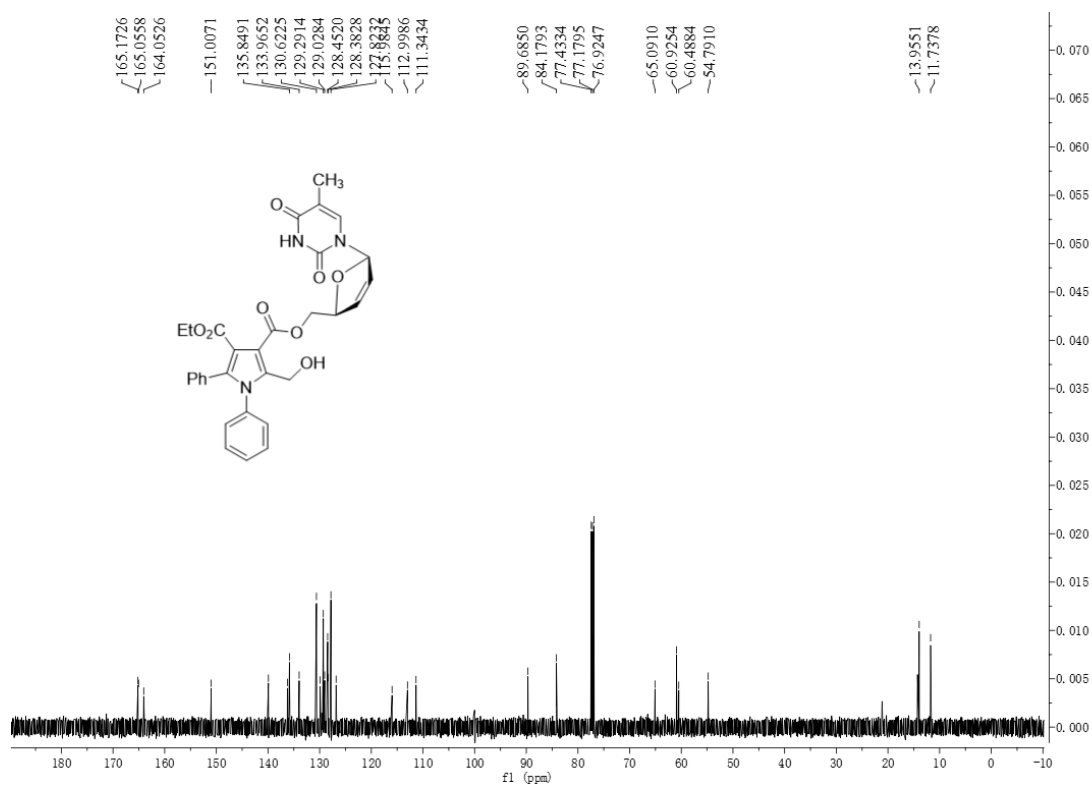

Diethyl 1-(2-(1*H*-indol-3-yl)ethyl)-2-(hydroxymethyl)-5-phenyl-1*H*-pyrrole-3,4-dicarboxylate  
(17af)

$^1\text{H}$  NMR (500 MHz,  $\text{CDCl}_3$ )

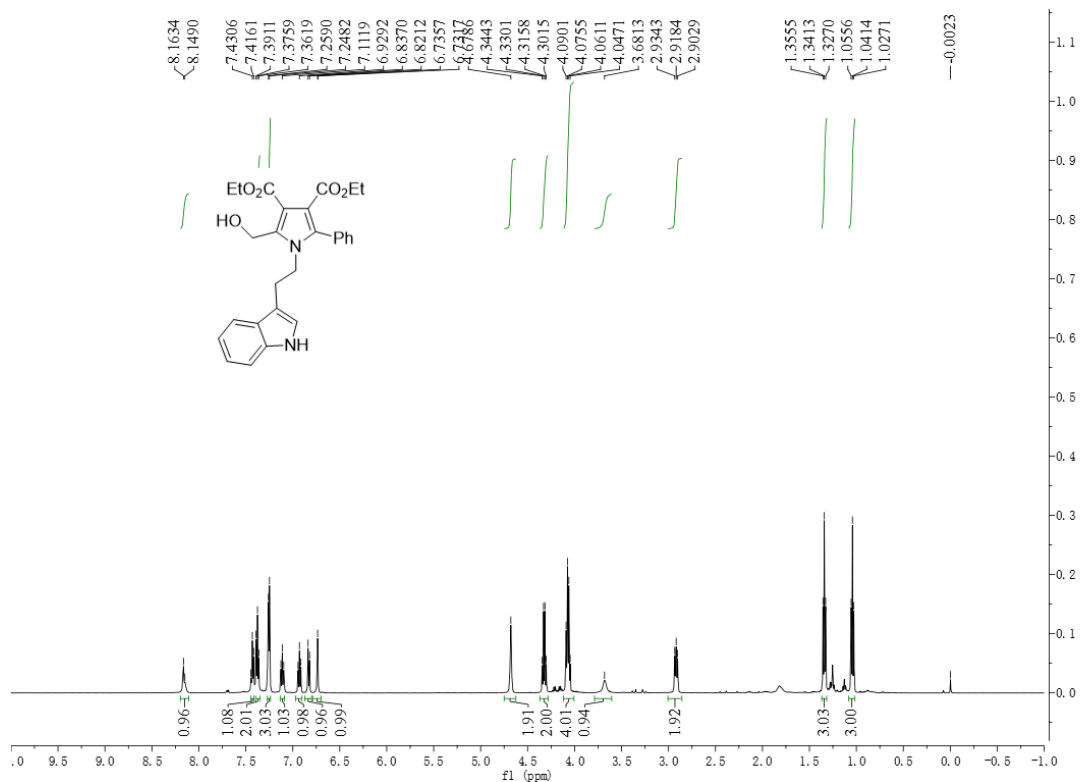

$^{13}\text{C}$  NMR (125 MHz,  $\text{CDCl}_3$ )

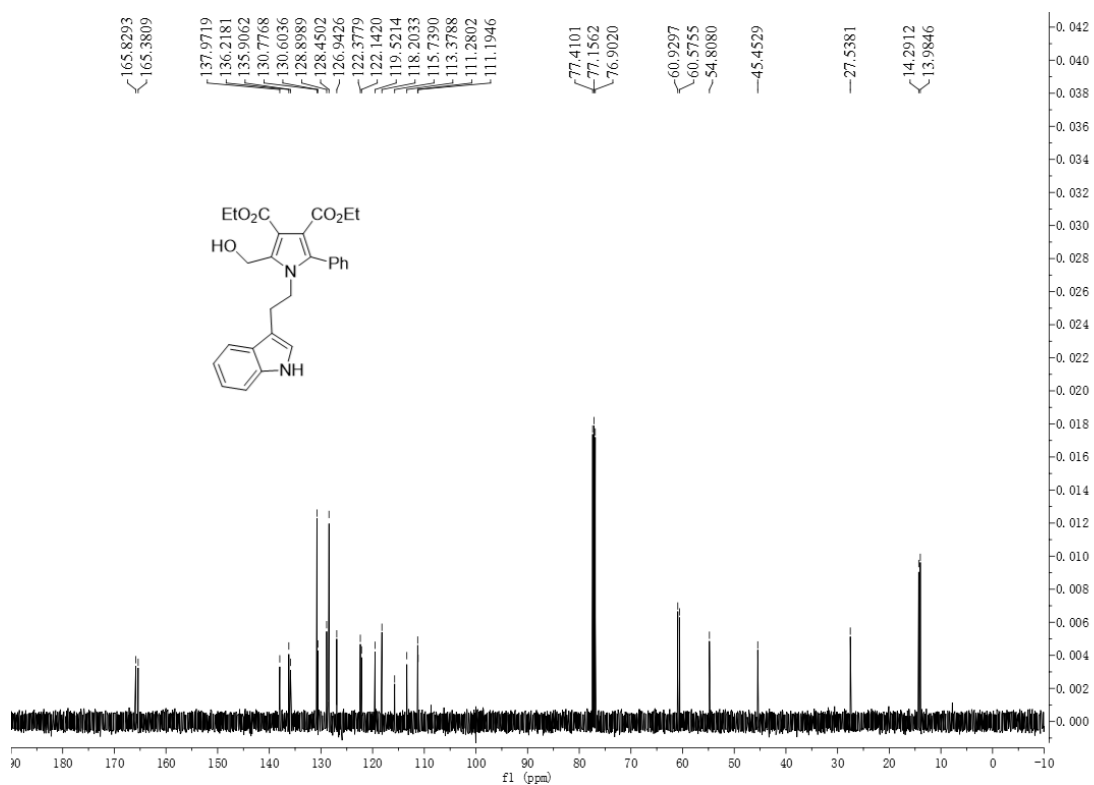

**Diethyl 2-(hydroxymethyl)-1-(2-oxo-4-(trifluoromethyl)-2H-chromen-7-yl)-5-phenyl-1H-pyrrole-3,4-dicarboxylate (17ag)**

$^1\text{H}$  NMR (500 MHz,  $\text{CDCl}_3$ )

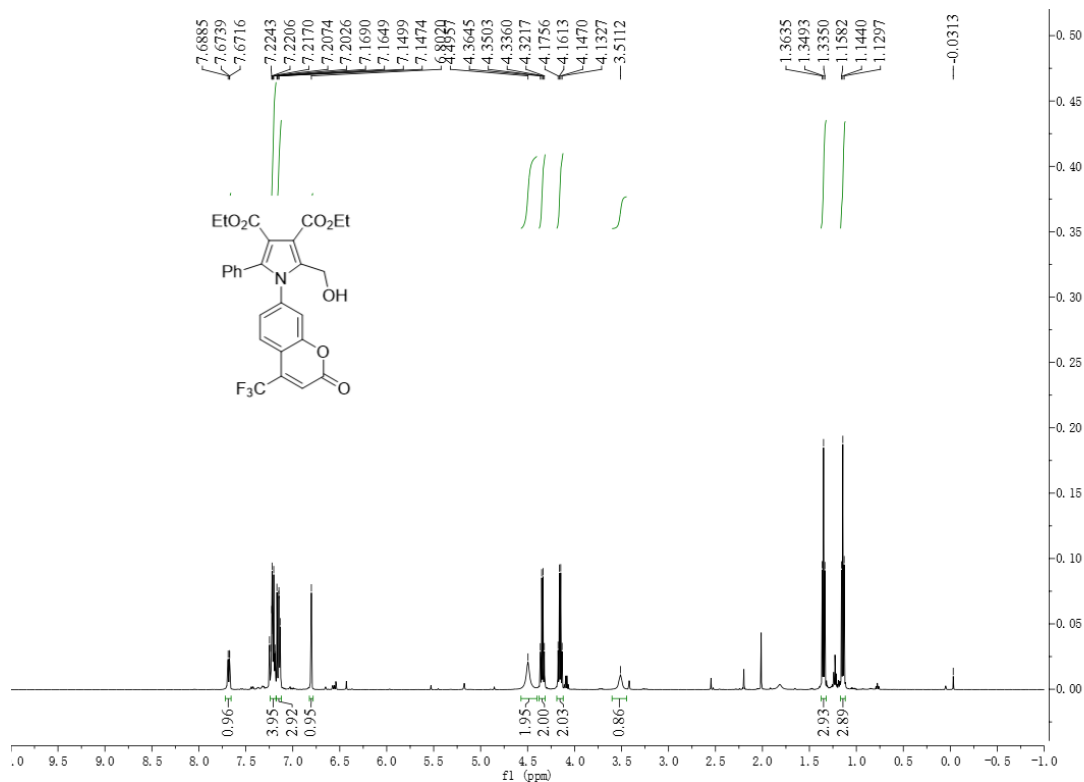

<sup>13</sup>C NMR (125 MHz, CDCl<sub>3</sub>)

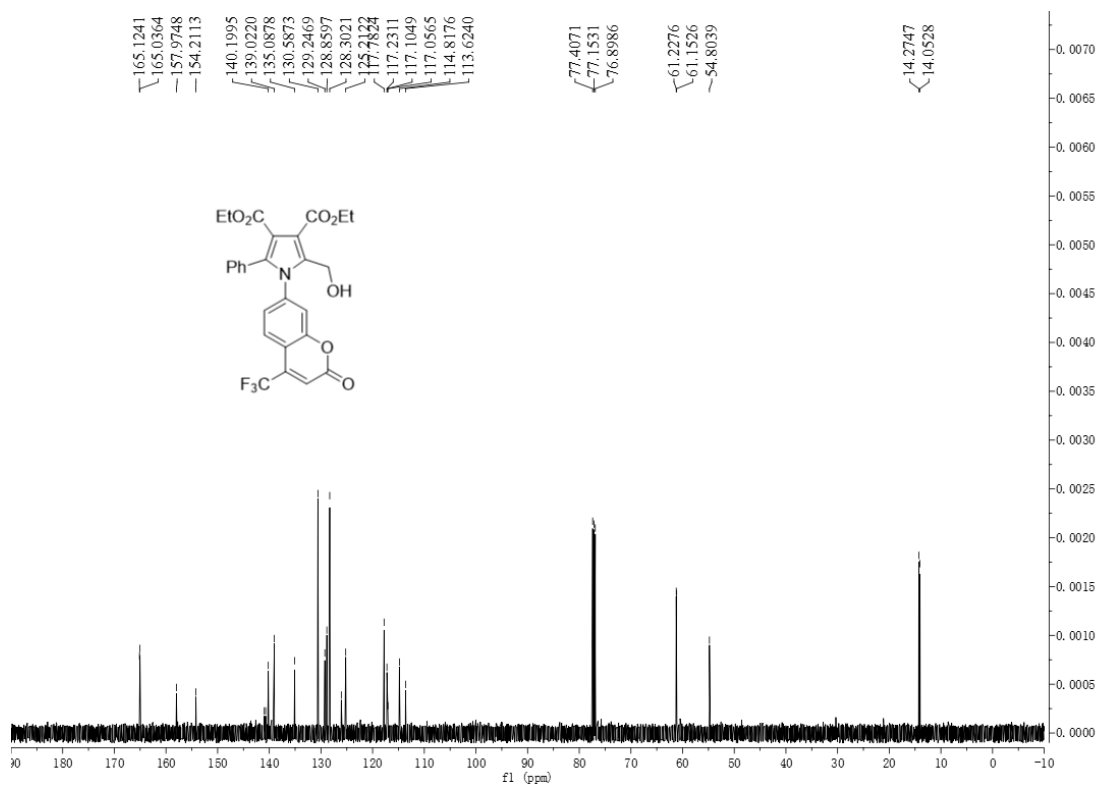

<sup>19</sup>F NMR (470 MHz, CDCl<sub>3</sub>)

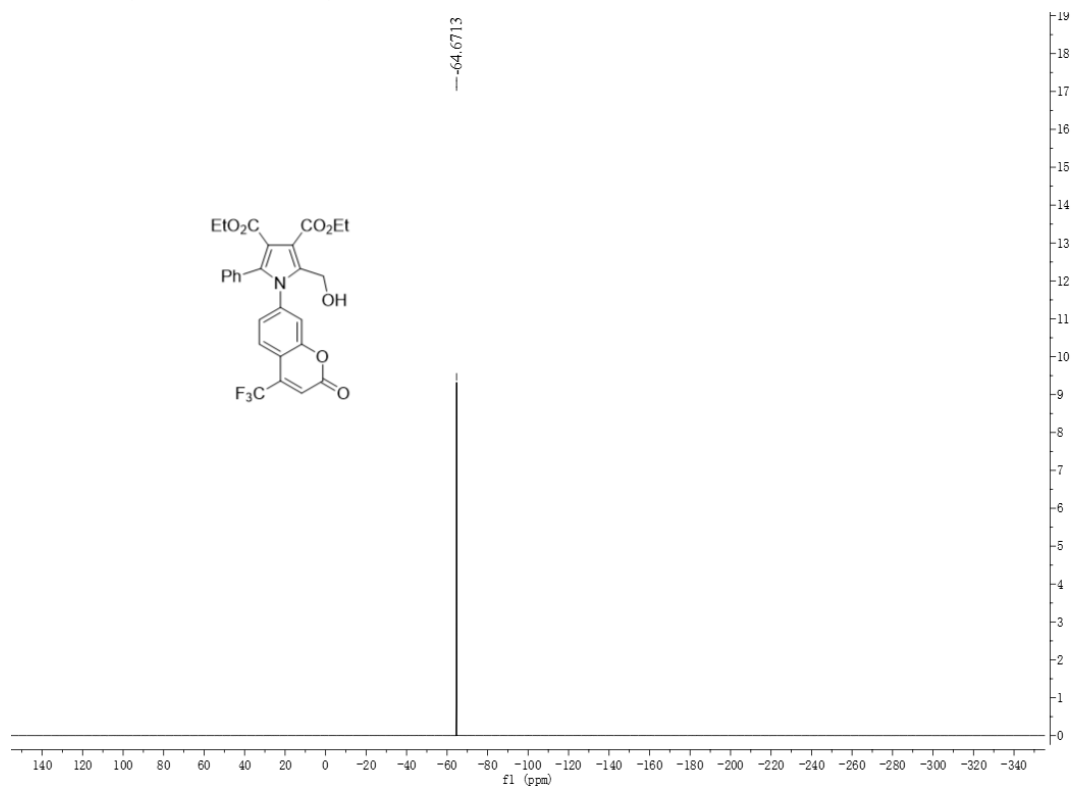

3-Ethyl 5-methyl 2-((2-(3,4-bis(ethoxycarbonyl)-2-(hydroxymethyl)-5-phenyl-1H-pyrrol-1-

yl)ethoxy)methyl)-4-(2-chlorophenyl)-6-methyl-1,4-dihydropyridine-3,5-dicarboxylate

(17ah)

<sup>1</sup>H NMR (500 MHz, CDCl<sub>3</sub>)

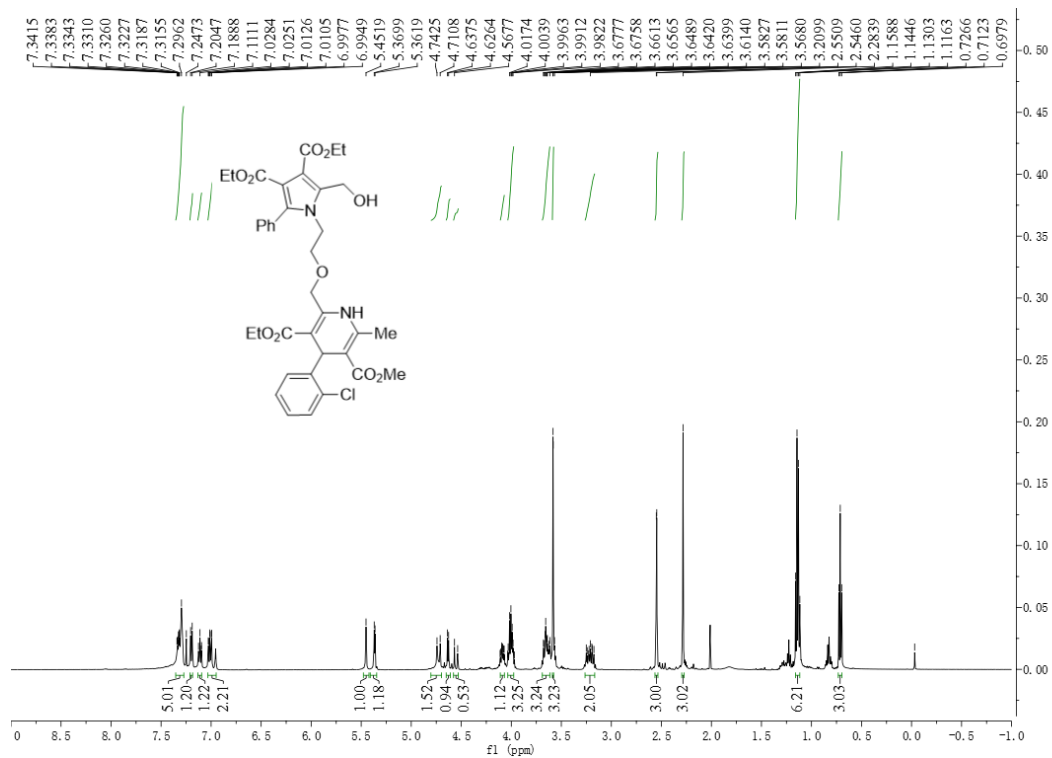

<sup>13</sup>C NMR (125 MHz, CDCl<sub>3</sub>)

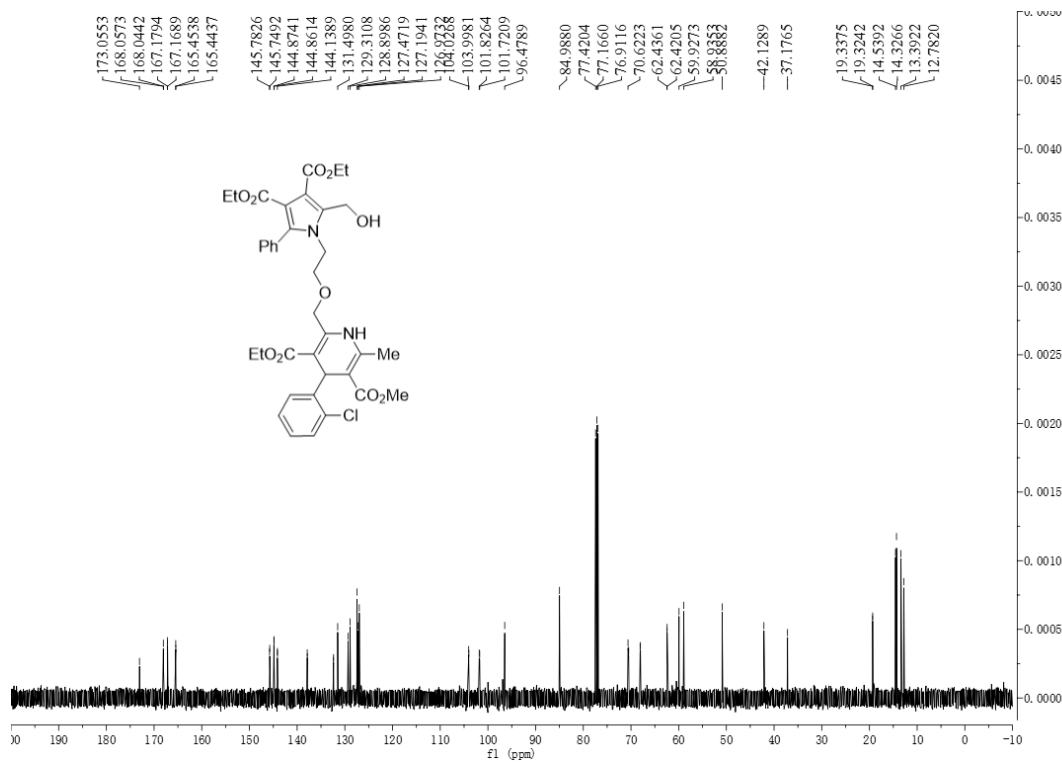

## Crystallographic data for compound 4ag

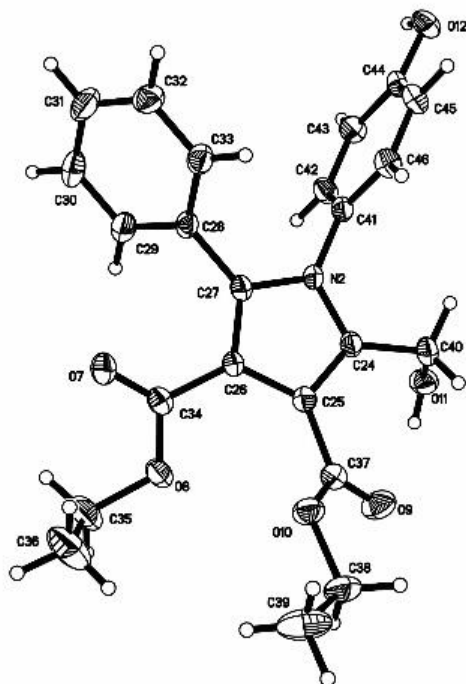

Table 1. Crystal data and structure refinement for **4ag**.

|                                 |                                                  |                 |
|---------------------------------|--------------------------------------------------|-----------------|
| Identification code             | <b>4ag</b>                                       |                 |
| Empirical formula               | C <sub>23</sub> H <sub>23</sub> N O <sub>6</sub> |                 |
| Formula weight                  | 409.42                                           |                 |
| Temperature                     | 296(2) K                                         |                 |
| Wavelength                      | 0.71073 Å                                        |                 |
| Crystal system                  | Monoclinic                                       |                 |
| Space group                     | P2 <sub>1</sub> /c                               |                 |
| Unit cell dimensions            | a = 12.4110(15) Å                                | α = 90°.        |
|                                 | b = 9.4820(13) Å                                 | β = 91.857(3)°. |
|                                 | c = 36.247(4) Å                                  | γ = 90°.        |
| Volume                          | 4263.4(9) Å <sup>3</sup>                         |                 |
| Z                               | 8                                                |                 |
| Density (calculated)            | 1.276 Mg/m <sup>3</sup>                          |                 |
| Absorption coefficient          | 0.093 mm <sup>-1</sup>                           |                 |
| F(000)                          | 1728                                             |                 |
| Crystal size                    | 0.120 x 0.100 x 0.030 mm <sup>3</sup>            |                 |
| Theta range for data collection | 2.220 to 24.997°.                                |                 |
| Index ranges                    | -14 ≤ h ≤ 14, -11 ≤ k ≤ 11, -43 ≤ l ≤ 43         |                 |

|                                   |                                             |
|-----------------------------------|---------------------------------------------|
| Reflections collected             | 40423                                       |
| Independent reflections           | 7486 [R(int) = 0.0812]                      |
| Completeness to theta = 24.997°   | 99.6 %                                      |
| Absorption correction             | Semi-empirical from equivalents             |
| Max. and min. transmission        | 0.7456 and 0.5882                           |
| Refinement method                 | Full-matrix least-squares on F <sup>2</sup> |
| Data / restraints / parameters    | 7486 / 58 / 573                             |
| Goodness-of-fit on F <sup>2</sup> | 1.072                                       |
| Final R indices [I > 2sigma(I)]   | R1 = 0.0793, wR2 = 0.1628                   |
| R indices (all data)              | R1 = 0.1405, wR2 = 0.1858                   |
| Extinction coefficient            | n/a                                         |
| Largest diff. peak and hole       | 0.297 and -0.221 e.Å <sup>-3</sup>          |

Table 2. Bond lengths [Å] and angles [°] for **4ag**.

---

|               |           |
|---------------|-----------|
| C(1)-C(2)     | 1.360(5)  |
| C(1)-N(1)     | 1.379(5)  |
| C(1)-C(5)     | 1.480(5)  |
| C(2)-C(3)     | 1.435(5)  |
| C(2)-C(11)    | 1.471(6)  |
| C(3)-C(4)     | 1.379(5)  |
| C(3)-C(14)    | 1.463(6)  |
| C(4)-N(1)     | 1.368(5)  |
| C(4)-C(17)    | 1.482(5)  |
| C(5)-C(6)     | 1.373(6)  |
| C(5)-C(10)    | 1.379(5)  |
| C(6)-C(7)     | 1.387(6)  |
| C(6)-H(6)     | 0.9300    |
| C(7)-C(8)     | 1.359(7)  |
| C(7)-H(7)     | 0.9300    |
| C(8)-C(9)     | 1.367(7)  |
| C(8)-H(8)     | 0.9300    |
| C(9)-C(10)    | 1.386(6)  |
| C(9)-H(9)     | 0.9300    |
| C(10)-H(10)   | 0.9300    |
| C(11)-O(1)    | 1.193(5)  |
| C(11)-O(2)    | 1.333(5)  |
| C(12)-C(13B)  | 1.27(3)   |
| C(12)-O(2)    | 1.445(5)  |
| C(12)-C(13A)  | 1.456(16) |
| C(12)-H(12A)  | 0.9700    |
| C(12)-H(12B)  | 0.9700    |
| C(12)-H(12C)  | 0.9700    |
| C(12)-H(12D)  | 0.9700    |
| C(13A)-H(13A) | 0.9600    |
| C(13A)-H(13B) | 0.9600    |
| C(13A)-H(13C) | 0.9600    |
| C(13B)-H(13D) | 0.9600    |
| C(13B)-H(13E) | 0.9600    |
| C(13B)-H(13F) | 0.9600    |
| C(14)-O(3)    | 1.205(5)  |

|               |           |
|---------------|-----------|
| C(14)-O(4)    | 1.317(5)  |
| C(15)-C(16A)  | 1.361(18) |
| C(15)-O(4)    | 1.459(6)  |
| C(15)-C(16B)  | 1.482(17) |
| C(15)-H(15A)  | 0.9700    |
| C(15)-H(15B)  | 0.9700    |
| C(15)-H(15C)  | 0.9700    |
| C(15)-H(15D)  | 0.9700    |
| C(16A)-H(16A) | 0.9600    |
| C(16A)-H(16B) | 0.9600    |
| C(16A)-H(16C) | 0.9600    |
| C(16B)-H(16D) | 0.9600    |
| C(16B)-H(16E) | 0.9600    |
| C(16B)-H(16F) | 0.9600    |
| C(17)-O(5)    | 1.416(5)  |
| C(17)-H(17A)  | 0.9700    |
| C(17)-H(17B)  | 0.9700    |
| C(18)-C(19)   | 1.371(5)  |
| C(18)-C(23)   | 1.374(5)  |
| C(18)-N(1)    | 1.442(5)  |
| C(19)-C(20)   | 1.367(6)  |
| C(19)-H(19)   | 0.9300    |
| C(20)-C(21)   | 1.380(6)  |
| C(20)-H(20)   | 0.9300    |
| C(21)-O(6)    | 1.361(5)  |
| C(21)-C(22)   | 1.373(6)  |
| C(22)-C(23)   | 1.376(6)  |
| C(22)-H(22)   | 0.9300    |
| C(23)-H(23)   | 0.9300    |
| C(24)-C(25)   | 1.371(5)  |
| C(24)-N(2)    | 1.375(5)  |
| C(24)-C(40)   | 1.492(5)  |
| C(25)-C(26)   | 1.434(5)  |
| C(25)-C(37)   | 1.464(5)  |
| C(26)-C(27)   | 1.372(5)  |
| C(26)-C(34)   | 1.462(5)  |
| C(27)-N(2)    | 1.382(5)  |
| C(27)-C(28)   | 1.472(5)  |



|              |          |
|--------------|----------|
| C(28)-C(29)  | 1.378(6) |
| C(28)-C(33)  | 1.388(5) |
| C(29)-C(30)  | 1.376(6) |
| C(29)-H(29)  | 0.9300   |
| C(30)-C(31)  | 1.368(7) |
| C(30)-H(30)  | 0.9300   |
| C(31)-C(32)  | 1.367(7) |
| C(31)-H(31)  | 0.9300   |
| C(32)-C(33)  | 1.364(6) |
| C(32)-H(32)  | 0.9300   |
| C(33)-H(33)  | 0.9300   |
| C(34)-O(7)   | 1.208(5) |
| C(34)-O(8)   | 1.333(5) |
| C(35)-O(8)   | 1.452(5) |
| C(35)-C(36)  | 1.453(7) |
| C(35)-H(35A) | 0.9700   |
| C(35)-H(35B) | 0.9700   |
| C(36)-H(36A) | 0.9600   |
| C(36)-H(36B) | 0.9600   |
| C(36)-H(36C) | 0.9600   |
| C(37)-O(9)   | 1.211(5) |
| C(37)-O(10)  | 1.323(5) |
| C(38)-O(10)  | 1.453(5) |
| C(38)-C(39)  | 1.464(7) |
| C(38)-H(38A) | 0.9700   |
| C(38)-H(38B) | 0.9700   |
| C(39)-H(39A) | 0.9600   |
| C(39)-H(39B) | 0.9600   |
| C(39)-H(39C) | 0.9600   |
| C(40)-O(11)  | 1.424(5) |
| C(40)-H(40A) | 0.9700   |
| C(40)-H(40B) | 0.9700   |
| C(41)-C(42)  | 1.357(5) |
| C(41)-C(46)  | 1.373(5) |
| C(41)-N(2)   | 1.436(5) |
| C(42)-C(43)  | 1.388(5) |
| C(42)-H(42)  | 0.9300   |
| C(43)-C(44)  | 1.367(5) |

|                 |          |
|-----------------|----------|
| C(43)-H(43)     | 0.9300   |
| C(44)-O(12)     | 1.369(5) |
| C(44)-C(45)     | 1.371(5) |
| C(45)-C(46)     | 1.373(5) |
| C(45)-H(45)     | 0.9300   |
| C(46)-H(46)     | 0.9300   |
| O(5)-H(5)       | 1.0362   |
| O(6)-H(6A)      | 0.8200   |
| O(11)-H(11)     | 0.79(5)  |
| O(12)-H(12)     | 0.95(5)  |
|                 |          |
| C(2)-C(1)-N(1)  | 107.7(3) |
| C(2)-C(1)-C(5)  | 130.8(3) |
| N(1)-C(1)-C(5)  | 121.5(3) |
| C(1)-C(2)-C(3)  | 107.7(3) |
| C(1)-C(2)-C(11) | 125.4(4) |
| C(3)-C(2)-C(11) | 126.7(4) |
| C(4)-C(3)-C(2)  | 106.9(4) |
| C(4)-C(3)-C(14) | 122.0(4) |
| C(2)-C(3)-C(14) | 130.9(4) |
| N(1)-C(4)-C(3)  | 107.7(3) |
| N(1)-C(4)-C(17) | 123.2(4) |
| C(3)-C(4)-C(17) | 129.1(4) |
| C(6)-C(5)-C(10) | 118.9(4) |
| C(6)-C(5)-C(1)  | 120.6(4) |
| C(10)-C(5)-C(1) | 120.5(4) |
| C(5)-C(6)-C(7)  | 120.7(5) |
| C(5)-C(6)-H(6)  | 119.7    |
| C(7)-C(6)-H(6)  | 119.7    |
| C(8)-C(7)-C(6)  | 119.7(5) |
| C(8)-C(7)-H(7)  | 120.1    |
| C(6)-C(7)-H(7)  | 120.1    |
| C(7)-C(8)-C(9)  | 120.5(5) |
| C(7)-C(8)-H(8)  | 119.7    |
| C(9)-C(8)-H(8)  | 119.7    |
| C(8)-C(9)-C(10) | 119.8(5) |
| C(8)-C(9)-H(9)  | 120.1    |
| C(10)-C(9)-H(9) | 120.1    |

|                      |           |
|----------------------|-----------|
| C(5)-C(10)-C(9)      | 120.3(4)  |
| C(5)-C(10)-H(10)     | 119.9     |
| C(9)-C(10)-H(10)     | 119.9     |
| O(1)-C(11)-O(2)      | 123.2(4)  |
| O(1)-C(11)-C(2)      | 125.8(4)  |
| O(2)-C(11)-C(2)      | 111.0(4)  |
| C(13B)-C(12)-O(2)    | 118.4(18) |
| O(2)-C(12)-C(13A)    | 107.0(9)  |
| O(2)-C(12)-H(12A)    | 110.3     |
| C(13A)-C(12)-H(12A)  | 110.3     |
| O(2)-C(12)-H(12B)    | 110.3     |
| C(13A)-C(12)-H(12B)  | 110.3     |
| H(12A)-C(12)-H(12B)  | 108.6     |
| C(13B)-C(12)-H(12C)  | 107.7     |
| O(2)-C(12)-H(12C)    | 107.7     |
| C(13B)-C(12)-H(12D)  | 107.7     |
| O(2)-C(12)-H(12D)    | 107.7     |
| H(12C)-C(12)-H(12D)  | 107.1     |
| C(12)-C(13A)-H(13A)  | 109.5     |
| C(12)-C(13A)-H(13B)  | 109.5     |
| H(13A)-C(13A)-H(13B) | 109.5     |
| C(12)-C(13A)-H(13C)  | 109.5     |
| H(13A)-C(13A)-H(13C) | 109.5     |
| H(13B)-C(13A)-H(13C) | 109.5     |
| C(12)-C(13B)-H(13D)  | 109.5     |
| C(12)-C(13B)-H(13E)  | 109.5     |
| H(13D)-C(13B)-H(13E) | 109.5     |
| C(12)-C(13B)-H(13F)  | 109.5     |
| H(13D)-C(13B)-H(13F) | 109.5     |
| H(13E)-C(13B)-H(13F) | 109.5     |
| O(3)-C(14)-O(4)      | 124.1(4)  |
| O(3)-C(14)-C(3)      | 123.6(4)  |
| O(4)-C(14)-C(3)      | 112.2(4)  |
| C(16A)-C(15)-O(4)    | 113.6(9)  |
| O(4)-C(15)-C(16B)    | 106.1(8)  |
| C(16A)-C(15)-H(15A)  | 108.8     |
| O(4)-C(15)-H(15A)    | 108.8     |
| C(16A)-C(15)-H(15B)  | 108.8     |

|                      |          |
|----------------------|----------|
| O(4)-C(15)-H(15B)    | 108.8    |
| H(15A)-C(15)-H(15B)  | 107.7    |
| O(4)-C(15)-H(15C)    | 110.5    |
| C(16B)-C(15)-H(15C)  | 110.5    |
| O(4)-C(15)-H(15D)    | 110.5    |
| C(16B)-C(15)-H(15D)  | 110.5    |
| H(15C)-C(15)-H(15D)  | 108.7    |
| C(15)-C(16A)-H(16A)  | 109.5    |
| C(15)-C(16A)-H(16B)  | 109.5    |
| H(16A)-C(16A)-H(16B) | 109.5    |
| C(15)-C(16A)-H(16C)  | 109.5    |
| H(16A)-C(16A)-H(16C) | 109.5    |
| H(16B)-C(16A)-H(16C) | 109.5    |
| C(15)-C(16B)-H(16D)  | 109.5    |
| C(15)-C(16B)-H(16E)  | 109.5    |
| H(16D)-C(16B)-H(16E) | 109.5    |
| C(15)-C(16B)-H(16F)  | 109.5    |
| H(16D)-C(16B)-H(16F) | 109.5    |
| H(16E)-C(16B)-H(16F) | 109.5    |
| O(5)-C(17)-C(4)      | 113.9(4) |
| O(5)-C(17)-H(17A)    | 108.8    |
| C(4)-C(17)-H(17A)    | 108.8    |
| O(5)-C(17)-H(17B)    | 108.8    |
| C(4)-C(17)-H(17B)    | 108.8    |
| H(17A)-C(17)-H(17B)  | 107.7    |
| C(19)-C(18)-C(23)    | 120.1(4) |
| C(19)-C(18)-N(1)     | 120.0(4) |
| C(23)-C(18)-N(1)     | 119.9(3) |
| C(20)-C(19)-C(18)    | 120.4(4) |
| C(20)-C(19)-H(19)    | 119.8    |
| C(18)-C(19)-H(19)    | 119.8    |
| C(19)-C(20)-C(21)    | 120.0(4) |
| C(19)-C(20)-H(20)    | 120.0    |
| C(21)-C(20)-H(20)    | 120.0    |
| O(6)-C(21)-C(22)     | 123.4(4) |
| O(6)-C(21)-C(20)     | 117.1(4) |
| C(22)-C(21)-C(20)    | 119.5(4) |
| C(21)-C(22)-C(23)    | 120.6(4) |

|                   |          |
|-------------------|----------|
| C(21)-C(22)-H(22) | 119.7    |
| C(23)-C(22)-H(22) | 119.7    |
| C(18)-C(23)-C(22) | 119.5(4) |
| C(18)-C(23)-H(23) | 120.3    |
| C(22)-C(23)-H(23) | 120.3    |
| C(25)-C(24)-N(2)  | 107.8(3) |
| C(25)-C(24)-C(40) | 129.2(4) |
| N(2)-C(24)-C(40)  | 123.0(3) |
| C(24)-C(25)-C(26) | 107.5(3) |
| C(24)-C(25)-C(37) | 120.0(4) |
| C(26)-C(25)-C(37) | 132.0(4) |
| C(27)-C(26)-C(25) | 107.3(3) |
| C(27)-C(26)-C(34) | 124.1(4) |
| C(25)-C(26)-C(34) | 128.1(3) |
| C(26)-C(27)-N(2)  | 107.6(3) |
| C(26)-C(27)-C(28) | 131.3(3) |
| N(2)-C(27)-C(28)  | 121.0(3) |
| C(29)-C(28)-C(33) | 118.5(4) |
| C(29)-C(28)-C(27) | 120.8(4) |
| C(33)-C(28)-C(27) | 120.8(4) |
| C(30)-C(29)-C(28) | 120.8(4) |
| C(30)-C(29)-H(29) | 119.6    |
| C(28)-C(29)-H(29) | 119.6    |
| C(31)-C(30)-C(29) | 119.9(5) |
| C(31)-C(30)-H(30) | 120.1    |
| C(29)-C(30)-H(30) | 120.1    |
| C(32)-C(31)-C(30) | 119.9(5) |
| C(32)-C(31)-H(31) | 120.1    |
| C(30)-C(31)-H(31) | 120.1    |
| C(33)-C(32)-C(31) | 120.7(5) |
| C(33)-C(32)-H(32) | 119.7    |
| C(31)-C(32)-H(32) | 119.7    |
| C(32)-C(33)-C(28) | 120.3(4) |
| C(32)-C(33)-H(33) | 119.8    |
| C(28)-C(33)-H(33) | 119.8    |
| O(7)-C(34)-O(8)   | 122.9(4) |
| O(7)-C(34)-C(26)  | 125.1(4) |
| O(8)-C(34)-C(26)  | 111.8(4) |

|                     |          |
|---------------------|----------|
| O(8)-C(35)-C(36)    | 111.2(5) |
| O(8)-C(35)-H(35A)   | 109.4    |
| C(36)-C(35)-H(35A)  | 109.4    |
| O(8)-C(35)-H(35B)   | 109.4    |
| C(36)-C(35)-H(35B)  | 109.4    |
| H(35A)-C(35)-H(35B) | 108.0    |
| C(35)-C(36)-H(36A)  | 109.5    |
| C(35)-C(36)-H(36B)  | 109.5    |
| H(36A)-C(36)-H(36B) | 109.5    |
| C(35)-C(36)-H(36C)  | 109.5    |
| H(36A)-C(36)-H(36C) | 109.5    |
| H(36B)-C(36)-H(36C) | 109.5    |
| O(9)-C(37)-O(10)    | 123.4(4) |
| O(9)-C(37)-C(25)    | 123.4(4) |
| O(10)-C(37)-C(25)   | 113.1(4) |
| O(10)-C(38)-C(39)   | 107.7(4) |
| O(10)-C(38)-H(38A)  | 110.2    |
| C(39)-C(38)-H(38A)  | 110.2    |
| O(10)-C(38)-H(38B)  | 110.2    |
| C(39)-C(38)-H(38B)  | 110.2    |
| H(38A)-C(38)-H(38B) | 108.5    |
| C(38)-C(39)-H(39A)  | 109.5    |
| C(38)-C(39)-H(39B)  | 109.5    |
| H(39A)-C(39)-H(39B) | 109.5    |
| C(38)-C(39)-H(39C)  | 109.5    |
| H(39A)-C(39)-H(39C) | 109.5    |
| H(39B)-C(39)-H(39C) | 109.5    |
| O(11)-C(40)-C(24)   | 111.5(3) |
| O(11)-C(40)-H(40A)  | 109.3    |
| C(24)-C(40)-H(40A)  | 109.3    |
| O(11)-C(40)-H(40B)  | 109.3    |
| C(24)-C(40)-H(40B)  | 109.3    |
| H(40A)-C(40)-H(40B) | 108.0    |
| C(42)-C(41)-C(46)   | 120.1(4) |
| C(42)-C(41)-N(2)    | 119.9(3) |
| C(46)-C(41)-N(2)    | 120.0(3) |
| C(41)-C(42)-C(43)   | 120.5(4) |
| C(41)-C(42)-H(42)   | 119.7    |

|                   |          |
|-------------------|----------|
| C(43)-C(42)-H(42) | 119.7    |
| C(44)-C(43)-C(42) | 119.4(4) |
| C(44)-C(43)-H(43) | 120.3    |
| C(42)-C(43)-H(43) | 120.3    |
| C(43)-C(44)-O(12) | 122.0(4) |
| C(43)-C(44)-C(45) | 119.9(4) |
| O(12)-C(44)-C(45) | 118.1(3) |
| C(44)-C(45)-C(46) | 120.5(4) |
| C(44)-C(45)-H(45) | 119.7    |
| C(46)-C(45)-H(45) | 119.7    |
| C(41)-C(46)-C(45) | 119.6(4) |
| C(41)-C(46)-H(46) | 120.2    |
| C(45)-C(46)-H(46) | 120.2    |
| C(4)-N(1)-C(1)    | 110.0(3) |
| C(4)-N(1)-C(18)   | 124.6(3) |
| C(1)-N(1)-C(18)   | 125.2(3) |
| C(24)-N(2)-C(27)  | 109.7(3) |
| C(24)-N(2)-C(41)  | 124.3(3) |
| C(27)-N(2)-C(41)  | 125.8(3) |
| C(11)-O(2)-C(12)  | 115.6(4) |
| C(14)-O(4)-C(15)  | 116.7(4) |
| C(17)-O(5)-H(5)   | 111.0    |
| C(21)-O(6)-H(6A)  | 109.5    |
| C(34)-O(8)-C(35)  | 116.6(4) |
| C(37)-O(10)-C(38) | 115.8(4) |
| C(40)-O(11)-H(11) | 109(4)   |
| C(44)-O(12)-H(12) | 107(3)   |

---

Symmetry transformations used to generate equivalent atoms:

Table 3. Torsion angles [°] for **4ag**.

---

|                         |           |
|-------------------------|-----------|
| N(1)-C(1)-C(2)-C(3)     | 0.8(4)    |
| C(5)-C(1)-C(2)-C(3)     | 178.8(4)  |
| N(1)-C(1)-C(2)-C(11)    | -174.2(4) |
| C(5)-C(1)-C(2)-C(11)    | 3.8(7)    |
| C(1)-C(2)-C(3)-C(4)     | -0.4(4)   |
| C(11)-C(2)-C(3)-C(4)    | 174.5(4)  |
| C(1)-C(2)-C(3)-C(14)    | 174.3(4)  |
| C(11)-C(2)-C(3)-C(14)   | -10.8(7)  |
| C(2)-C(3)-C(4)-N(1)     | -0.2(4)   |
| C(14)-C(3)-C(4)-N(1)    | -175.4(3) |
| C(2)-C(3)-C(4)-C(17)    | 178.7(4)  |
| C(14)-C(3)-C(4)-C(17)   | 3.4(7)    |
| C(2)-C(1)-C(5)-C(6)     | 128.3(5)  |
| N(1)-C(1)-C(5)-C(6)     | -53.9(5)  |
| C(2)-C(1)-C(5)-C(10)    | -50.0(6)  |
| N(1)-C(1)-C(5)-C(10)    | 127.8(4)  |
| C(10)-C(5)-C(6)-C(7)    | -1.2(7)   |
| C(1)-C(5)-C(6)-C(7)     | -179.5(4) |
| C(5)-C(6)-C(7)-C(8)     | 0.7(8)    |
| C(6)-C(7)-C(8)-C(9)     | 0.7(8)    |
| C(7)-C(8)-C(9)-C(10)    | -1.6(8)   |
| C(6)-C(5)-C(10)-C(9)    | 0.3(7)    |
| C(1)-C(5)-C(10)-C(9)    | 178.6(4)  |
| C(8)-C(9)-C(10)-C(5)    | 1.1(7)    |
| C(1)-C(2)-C(11)-O(1)    | 131.7(5)  |
| C(3)-C(2)-C(11)-O(1)    | -42.3(7)  |
| C(1)-C(2)-C(11)-O(2)    | -47.9(5)  |
| C(3)-C(2)-C(11)-O(2)    | 138.1(4)  |
| C(4)-C(3)-C(14)-O(3)    | -21.9(6)  |
| C(2)-C(3)-C(14)-O(3)    | 164.1(4)  |
| C(4)-C(3)-C(14)-O(4)    | 156.3(4)  |
| C(2)-C(3)-C(14)-O(4)    | -17.7(6)  |
| N(1)-C(4)-C(17)-O(5)    | -108.0(4) |
| C(3)-C(4)-C(17)-O(5)    | 73.3(6)   |
| C(23)-C(18)-C(19)-C(20) | -1.0(6)   |
| N(1)-C(18)-C(19)-C(20)  | 177.5(4)  |



|                         |           |
|-------------------------|-----------|
| C(18)-C(19)-C(20)-C(21) | 0.5(7)    |
| C(19)-C(20)-C(21)-O(6)  | -179.4(4) |
| C(19)-C(20)-C(21)-C(22) | 0.6(6)    |
| O(6)-C(21)-C(22)-C(23)  | 178.7(4)  |
| C(20)-C(21)-C(22)-C(23) | -1.3(6)   |
| C(19)-C(18)-C(23)-C(22) | 0.4(6)    |
| N(1)-C(18)-C(23)-C(22)  | -178.1(3) |
| C(21)-C(22)-C(23)-C(18) | 0.8(6)    |
| N(2)-C(24)-C(25)-C(26)  | 1.5(4)    |
| C(40)-C(24)-C(25)-C(26) | -177.4(4) |
| N(2)-C(24)-C(25)-C(37)  | -171.3(3) |
| C(40)-C(24)-C(25)-C(37) | 9.8(6)    |
| C(24)-C(25)-C(26)-C(27) | -1.5(4)   |
| C(37)-C(25)-C(26)-C(27) | 170.1(4)  |
| C(24)-C(25)-C(26)-C(34) | 171.1(4)  |
| C(37)-C(25)-C(26)-C(34) | -17.3(7)  |
| C(25)-C(26)-C(27)-N(2)  | 0.9(4)    |
| C(34)-C(26)-C(27)-N(2)  | -172.1(3) |
| C(25)-C(26)-C(27)-C(28) | 178.7(4)  |
| C(34)-C(26)-C(27)-C(28) | 5.7(7)    |
| C(26)-C(27)-C(28)-C(29) | -60.0(6)  |
| N(2)-C(27)-C(28)-C(29)  | 117.6(4)  |
| C(26)-C(27)-C(28)-C(33) | 120.5(5)  |
| N(2)-C(27)-C(28)-C(33)  | -61.9(5)  |
| C(33)-C(28)-C(29)-C(30) | -0.3(6)   |
| C(27)-C(28)-C(29)-C(30) | -179.9(4) |
| C(28)-C(29)-C(30)-C(31) | 0.6(7)    |
| C(29)-C(30)-C(31)-C(32) | -0.4(8)   |
| C(30)-C(31)-C(32)-C(33) | 0.1(8)    |
| C(31)-C(32)-C(33)-C(28) | 0.1(7)    |
| C(29)-C(28)-C(33)-C(32) | 0.0(6)    |
| C(27)-C(28)-C(33)-C(32) | 179.5(4)  |
| C(27)-C(26)-C(34)-O(7)  | -23.4(6)  |
| C(25)-C(26)-C(34)-O(7)  | 165.1(4)  |
| C(27)-C(26)-C(34)-O(8)  | 151.6(4)  |
| C(25)-C(26)-C(34)-O(8)  | -20.0(6)  |
| C(24)-C(25)-C(37)-O(9)  | -37.8(6)  |
| C(26)-C(25)-C(37)-O(9)  | 151.5(4)  |

|                         |           |
|-------------------------|-----------|
| C(24)-C(25)-C(37)-O(10) | 138.3(4)  |
| C(26)-C(25)-C(37)-O(10) | -32.4(6)  |
| C(25)-C(24)-C(40)-O(11) | 75.2(5)   |
| N(2)-C(24)-C(40)-O(11)  | -103.6(4) |
| C(46)-C(41)-C(42)-C(43) | 0.4(6)    |
| N(2)-C(41)-C(42)-C(43)  | -179.3(4) |
| C(41)-C(42)-C(43)-C(44) | -0.2(6)   |
| C(42)-C(43)-C(44)-O(12) | 178.2(4)  |
| C(42)-C(43)-C(44)-C(45) | -0.4(6)   |
| C(43)-C(44)-C(45)-C(46) | 0.8(6)    |
| O(12)-C(44)-C(45)-C(46) | -177.9(4) |
| C(42)-C(41)-C(46)-C(45) | 0.0(6)    |
| N(2)-C(41)-C(46)-C(45)  | 179.7(4)  |
| C(44)-C(45)-C(46)-C(41) | -0.5(6)   |
| C(3)-C(4)-N(1)-C(1)     | 0.7(4)    |
| C(17)-C(4)-N(1)-C(1)    | -178.3(4) |
| C(3)-C(4)-N(1)-C(18)    | -174.0(3) |
| C(17)-C(4)-N(1)-C(18)   | 7.0(6)    |
| C(2)-C(1)-N(1)-C(4)     | -0.9(4)   |
| C(5)-C(1)-N(1)-C(4)     | -179.1(3) |
| C(2)-C(1)-N(1)-C(18)    | 173.7(3)  |
| C(5)-C(1)-N(1)-C(18)    | -4.5(5)   |
| C(19)-C(18)-N(1)-C(4)   | -76.5(5)  |
| C(23)-C(18)-N(1)-C(4)   | 102.0(4)  |
| C(19)-C(18)-N(1)-C(1)   | 109.6(4)  |
| C(23)-C(18)-N(1)-C(1)   | -71.9(5)  |
| C(25)-C(24)-N(2)-C(27)  | -1.0(4)   |
| C(40)-C(24)-N(2)-C(27)  | 178.0(3)  |
| C(25)-C(24)-N(2)-C(41)  | -177.5(3) |
| C(40)-C(24)-N(2)-C(41)  | 1.5(6)    |
| C(26)-C(27)-N(2)-C(24)  | 0.0(4)    |
| C(28)-C(27)-N(2)-C(24)  | -178.0(3) |
| C(26)-C(27)-N(2)-C(41)  | 176.5(3)  |
| C(28)-C(27)-N(2)-C(41)  | -1.6(6)   |
| C(42)-C(41)-N(2)-C(24)  | 94.7(5)   |
| C(46)-C(41)-N(2)-C(24)  | -85.0(5)  |
| C(42)-C(41)-N(2)-C(27)  | -81.2(5)  |
| C(46)-C(41)-N(2)-C(27)  | 99.0(5)   |

|                         |            |
|-------------------------|------------|
| O(1)-C(11)-O(2)-C(12)   | -5.7(7)    |
| C(2)-C(11)-O(2)-C(12)   | 173.9(4)   |
| C(13B)-C(12)-O(2)-C(11) | 142(3)     |
| C(13A)-C(12)-O(2)-C(11) | 174.9(11)  |
| O(3)-C(14)-O(4)-C(15)   | -5.3(7)    |
| C(3)-C(14)-O(4)-C(15)   | 176.5(4)   |
| C(16A)-C(15)-O(4)-C(14) | 167.3(18)  |
| C(16B)-C(15)-O(4)-C(14) | -150.4(12) |
| O(7)-C(34)-O(8)-C(35)   | 3.0(6)     |
| C(26)-C(34)-O(8)-C(35)  | -172.1(4)  |
| C(36)-C(35)-O(8)-C(34)  | -83.2(6)   |
| O(9)-C(37)-O(10)-C(38)  | 2.0(6)     |
| C(25)-C(37)-O(10)-C(38) | -174.1(4)  |
| C(39)-C(38)-O(10)-C(37) | -178.0(4)  |

---

Symmetry transformations used to generate equivalent atoms:

Table 4. Hydrogen bonds for **4ag** [ $\text{\AA}$  and  $^\circ$ ].

| D-H...A              | d(D-H)  | d(H...A) | d(D...A) | $\angle(\text{DHA})$ |
|----------------------|---------|----------|----------|----------------------|
| C(19)-H(19)...O(2)#1 | 0.93    | 2.57     | 3.427(5) | 153.6                |
| C(23)-H(23)...O(1)#2 | 0.93    | 2.49     | 3.368(5) | 157.6                |
| C(36)-H(36C)...O(7)  | 0.96    | 2.65     | 3.131(7) | 111.6                |
| C(43)-H(43)...O(5)   | 0.93    | 2.62     | 3.305(5) | 130.9                |
| C(46)-H(46)...O(7)#3 | 0.93    | 2.48     | 3.189(5) | 133.5                |
| O(5)-H(5)...O(3)     | 1.04    | 2.23     | 2.945(4) | 125.0                |
| O(5)-H(5)...O(9)#4   | 1.04    | 2.05     | 2.916(4) | 139.0                |
| O(6)-H(6A)...O(11)   | 0.82    | 1.90     | 2.688(4) | 160.7                |
| O(11)-H(11)...O(3)#5 | 0.79(5) | 2.34(5)  | 2.993(4) | 141(5)               |
| O(11)-H(11)...O(9)   | 0.79(5) | 2.40(5)  | 2.997(4) | 134(5)               |
| O(12)-H(12)...O(5)   | 0.95(5) | 1.78(5)  | 2.731(4) | 176(4)               |

Symmetry transformations used to generate equivalent atoms:

#1  $-x, -y+2, -z+1$     #2  $-x, -y+1, -z+1$     #3  $-x+1, y+1/2, -z+3/2$

#4  $x-1, y, z$     #5  $x+1, y, z$
